# Supplementary material for: Gut microbiota and fecal short chain fatty acids differ with adiposity and country of origin: The METS-Microbiome Study
Source: Research Square preprint supplement (doi:10.21203/rs.3.rs-2791107/v1), 2023-04-13
Supplement: Supplementary file 1 [file 0be34a40d5796f4c407a8999.xlsx]

## Sheet: metadata & Fig. 1a&b
Metadata used in manuscript; alpha diversity data for Fig 1a &1b and Supplementary Table 1
sampleid	country	site	sample_type	age	sex	bmi	obese	diabetic	insulin	glucoseData	propionate	butyrate	valerate	acetate	totalscfa	Observed	Shannon	PD
13512.1	USA	5	stool	NA	NA	NA	NA	NA	NA	NA	798.95	471.83	70.52	1651.73	2993.03	118	3.03821	11.4802
13512.1	USA	5	stool	42	1	31.5052	1	0	0	88	1192.69	1043.66	165.55	3501.03	5902.94	155	3.66726	14.1946
13512.2	USA	5	stool	54	0	28.9815	0	0	0	98	531.02	909.24	88.83	1062.74	2591.82	137	3.32894	12.295
13512.1	USA	5	stool	41	0	20.8866	0	0	0	103	482.63	405.97	96.67	988.76	1974.02	111	2.93871	12.719
13512.1	USA	5	stool	49	0	25.9926	0	0	0	87	317.17	150.45	98.76	1101.35	1667.73	314	4.33238	24.4642
13512.1	USA	5	stool	54	0	23.0589	0	0	0	98	471.15	339	91.1	1153.6	2054.85	162	3.90067	14.0511
13512.2	USA	5	stool	45	1	27.2535	0	0	0	98	389.81	437.91	211.98	894.33	1934.03	189	3.6287	16.8997
13512.2	USA	5	stool	48	1	24.5784	0	0	0	94	233.62	211.33	53.18	396.6	894.73	267	4.22659	21.4013
13512.2	USA	5	stool	49	0	42.8649	1	0	0	87	1135.22	1176.99	275.71	1278.05	3865.97	201	4.01925	17.4074
13512.2	USA	5	stool	52	0	28.1893	0	0	0	85	1039.67	1895.63	363.37	1513.28	4811.94	113	3.05522	11.5778
13512.1	USA	5	stool	47	1	28.868	0	1	1	146	1147.5	707.52	27.05	2421.9	4303.97	129	2.91862	11.7724
13512.2	USA	5	stool	53	0	37.5107	1	0	0	85	3129.17	1310.21	186.42	2807.81	7433.61	206	3.67245	17.0962
13512.2	USA	5	stool	49	1	37.4852	1	0	0	99	1293.62	1486.3	129.06	2000.23	4909.21	148	3.4328	14.5192
13512.1	USA	5	stool	48	0	27.7363	0	0	0	101	558.93	532.62	80.78	1117.57	2289.91	156	3.50675	14.6711
13512.1	USA	5	stool	56	0	27.2051	0	1	1	210	1218.25	1495.67	81.6	3038.63	5834.15	103	2.76225	9.90032
13512.2	USA	5	stool	35	1	27.076	0	0	0	89	531.39	870.32	328.46	995.62	2725.78	258	4.13749	21.7569
13512.2	USA	5	stool	48	0	31.1577	1	0	0	104	556.15	371.52	84.01	749.45	1761.13	244	3.94994	20.6137
13512.1	USA	5	stool	53	0	21.176	0	0	0	94	619.68	1106.66	209.57	1724.99	3660.91	138	3.09584	11.9624
13512.2	USA	5	stool	42	1	30.4463	1	1	1	206	759.46	566.07	122.74	895.23	2343.52	123	3.31556	11.5639
13512.2	USA	5	stool	53	1	34.112	1	0	0	77	1885.26	2061.83	446.18	1902.84	6296.11	121	3.29923	12.0354
13512.2	USA	5	stool	40	1	26.5095	0	0	0	101	809.92	443.63	153.55	1023.49	2430.59	128	3.24316	12.3723
13512.2	USA	5	stool	49	0	27.3029	0	1	0	133	339.53	468.91	165.35	592.28	1566.06	214	3.93667	18.5407
13512.2	USA	5	stool	38	0	22.0616	0	0	0	84	1461.82	1097.63	273.67	1413.64	4246.76	119	3.1336	10.6467
13512.2	USA	5	stool	43	1	39.327	1	0	0	98	824.52	835.15	139.59	1916.32	3715.59	158	3.38652	14.3602
13512.2	USA	5	stool	40	1	36.275	1	0	0	77	604.39	440.99	86.79	713.94	1846.11	150	3.24951	13.7792
13512.1	USA	5	stool	53	0	25.057	0	0	0	88	579.68	423.63	85.02	2173.88	3262.21	167	3.75719	15.108
13512.1627a	USA	5	stool	53	1	22.7539	0	0	0	105	147.31	43.68	49.26	363.34	603.58	181	3.65279	15.202
13512.1	USA	5	stool	37	1	36.0564	1	0	0	87	479.67	421.74	102.54	1267.4	2271.34	189	4.18012	14.6229
13512.2	USA	5	stool	49	0	28.4775	0	0	0	88	390.36	452.86	102.36	616.55	1562.13	123	3.31886	11.5028
13512.1	USA	5	stool	53	0	17.8834	0	0	0	104	347.03	891.67	173.93	1850.8	3263.43	132	2.31449	12.7933
13512.2	USA	5	stool	55	1	35.0102	1	0	0	100	1665.13	1978.07	230.53	1977.75	5851.48	85	2.71278	8.97066
13512.1	USA	5	stool	34	1	44.7239	1	0	0	110	1417.15	1273.63	129.4	3209.78	6029.96	148	3.58637	12.6501
13512.1	USA	5	stool	53	1	26.8695	0	0	0	89	657.46	627.78	140.38	1314.84	2740.46	130	3.26584	11.8397
13512.1	USA	5	stool	41	1	42.6105	1	0	0	89	830.07	325.74	97.79	1995.53	3249.13	101	2.71448	10.2919
13512.1	USA	5	stool	49	1	49.5485	1	0	0	102	766.36	1382.45	263.9	1696.17	4108.88	111	3.22167	10.7388
13512.2	USA	5	stool	43	1	36.8189	1	0	0	95	1309.33	1002.01	135.82	1145.75	3592.9	116	3.32919	11.2849
13512.1	USA	5	stool	46	0	25.9155	0	0	0	96	95.01	516.32	1.53	1262.59	1875.45	84	2.37409	9.41754
13512.1	USA	5	stool	58	0	26.8317	0	0	0	108	820.07	909.74	182.51	2899.31	4811.62	156	3.5161	14.499
13512.1	USA	5	stool	34	1	31.1483	1	0	0	84	296.06	526.46	191.7	1276.11	2290.32	211	3.91017	17.1619
13512.2	USA	5	stool	42	0	25.3964	0	0	0	88	1218.95	964.85	105.16	1642.13	3931.1	201	3.83	17.0614
13512.2	USA	5	stool	53	1	33.6568	1	0	0	101	996.6	590.26	185.1	1321.35	3093.3	80	2.76516	7.8785
13512.1	USA	5	stool	41	1	28.6001	0	1	1	153	235.39	277.11	167.95	1338.56	2019.01	257	3.49317	23.6734
13512.1	USA	5	stool	59	0	23.2618	0	0	0	111	1133.79	1004.01	36.75	2379.26	4553.81	132	3.2232	12.732
13512.1	USA	5	stool	45	1	36.4293	1	0	0	104	355.29	642.76	26.67	1621.1	2645.82	189	3.34906	17.3657
13512.2	USA	5	stool	40	1	39.8016	1	0	0	104	1754.4	1449.81	59.75	1705.06	4969.03	135	3.36691	12.6677
13512.1	USA	5	stool	43	0	26.5924	0	0	0	86	552.27	314.29	107.95	1097.15	2071.66	121	3.03673	11.2396
13512.1	USA	5	stool	34	1	34.0657	1	0	0	92	555.6	1460.42	214.63	1266.8	3497.45	233	3.65841	19.8003
13512.2	USA	5	stool	40	1	34.2969	1	0	0	102	1257.03	1266.25	187.62	1056.75	3767.64	128	3.23019	11.173
13512.2	USA	5	stool	38	0	24.2593	0	1	0	143	2844.53	859.99	72.85	2959.14	6736.51	161	3.55172	14.4727
13512.1640a	USA	5	stool	44	1	35.6994	1	0	0	69	338.24	552.22	116.6	915.16	1922.23	137	3.46112	13.5439
13512.1	USA	5	stool	52	1	26.5221	0	0	0	107	792.29	626.46	123.17	2002.13	3544.05	151	2.86463	15.0453
13512.2	USA	5	stool	48	0	30.9343	1	0	0	113	2713.3	774.48	65.77	2517.14	6070.68	123	3.26258	12.1465
13512.2	USA	5	stool	43	1	36.5927	1	0	0	85	880.16	1197.44	77.13	1784.47	3939.2	170	3.70573	14.5573
13512.1	USA	5	stool	50	1	33.812	1	0	0	111	383.36	353.54	100.96	777.37	1615.23	157	3.54143	13.9345
13512.2	USA	5	stool	53	0	25.4396	0	0	0	112	1211.93	635.1	85.85	1199.39	3132.26	96	1.91829	10.5073
13512.1	USA	5	stool	44	1	39.1849	1	0	0	97	469.67	345.3	90.44	954.53	1859.93	141	3.48726	13.3966
13512.1	USA	5	stool	41	1	42.2713	1	1	0	166	789.32	1090.8	260.74	2232.13	4372.99	184	3.77206	16.0398
13512.2	USA	5	stool	41	0	27.1781	0	0	0	117	1368.29	1679.97	136.3	3312.74	6497.3	129	3.13534	12.4497
13512.1	USA	5	stool	50	1	46.1809	1	0	0	91	739.69	217.28	29.55	1059.92	2046.44	114	3.36317	10.6864
13512.2	USA	5	stool	50	1	61.5655	1	0	0	88	757.62	1476.63	320.56	1456.94	4011.75	173	3.29537	15.4833
13512.1	USA	5	stool	47	0	34.3273	1	1	1	339	903.78	997.41	92.12	2586.74	4580.04	170	3.58228	16.2414
13512.1	USA	5	stool	37	1	31.0269	1	0	0	103	486.34	1180.23	22.33	3170.75	4859.64	173	3.63229	15.758
13512.1	USA	5	stool	41	1	49.8763	1	0	0	94	436.33	541.44	70.37	1247.58	2295.72	179	3.66413	15.839
13512.2	USA	5	stool	52	1	50.9062	1	1	1	96	1352.95	596.85	109.24	1787.47	3846.51	93	2.41214	9.32834
13512.2	USA	5	stool	39	1	25.4541	0	0	0	73	564.28	269.74	112.09	614.9	1561.02	161	3.53333	14.0823
13512.2	USA	5	stool	46	1	29.0941	0	0	0	88	215.33	104.82	57.38	239.88	617.41	154	1.67411	15.0365
13512.2	USA	5	stool	38	1	71.1111	1	1	0	171	575	741.72	157.22	913.51	2387.46	202	4.18256	15.8482
13512.2	USA	5	stool	46	1	43.4484	1	1	1	117	841.53	785.25	186.88	1441.06	3254.72	203	3.33644	17.4766
13512.2	USA	5	stool	50	1	39.9584	1	0	0	87	268.37	536.18	6.56	1589.69	2400.8	81	2.2747	8.07287
13512.2	USA	5	stool	35	1	28.4268	0	0	0	105	519.93	429.78	166.29	605.76	1721.76	113	2.78548	11.7964
13512.2	USA	5	stool	39	0	51.4749	1	1	1	80	1183.09	837.57	172.28	1423.68	3616.63	117	3.1808	11.5238
13512.2	USA	5	stool	64	1	33.6467	1	0	0	87	1481.96	870.54	153.25	1732.03	4237.79	150	3.39362	13.8464
13512.2	USA	5	stool	44	1	36.1987	1	0	0	100	690.71	527.6	144.02	652.51	2014.84	130	2.95273	12.2702
13512.2	USA	5	stool	43	1	40.9688	1	0	0	110	298.68	139.48	64.21	511.07	1013.45	88	2.00725	9.56872
13512.2	USA	5	stool	35	1	52.0383	1	0	0	97	448.21	728.75	63.86	1739.52	2980.34	70	2.56318	7.5769
13512.2	USA	5	stool	55	0	28.9731	0	0	0	93	641.17	977.16	72.8	1193.69	2884.83	130	3.19452	12.4006
13512.2	USA	5	stool	47	1	38.641	1	0	0	89	806.41	1611.61	53.51	1229.8	3701.33	131	3.35333	12.4366
13512.1	USA	5	stool	38	1	48.8341	1	0	0	98	351.58	369.05	51.88	1045.21	1817.72	124	3.28486	12.7748
13512.1	USA	5	stool	39	0	44.0685	1	0	0	93	1533.46	1178.91	151.71	3101.69	5965.77	125	3.5819	12.5991
13512.1	USA	5	stool	39	0	49.603	1	0	0	91	1188.61	763.03	59.75	2254.65	4266.04	165	3.52499	13.7796
13512.1	USA	5	stool	37	1	57.3438	1	0	0	101	3800.3	1260.85	38.46	3867.35	8966.96	104	3.1372	10.048
13512.1	USA	5	stool	44	0	23.9395	0	0	0	91	1930.15	830.44	200.53	4386.8	7347.92	128	2.75039	12.669
13512.1	USA	5	stool	37	1	32.1918	1	0	0	78	717.84	615.45	103.61	1945.68	3382.58	135	2.92324	12.8348
13512.1	USA	5	stool	40	1	40.3203	1	0	0	103	1063.05	768.76	95.95	2168.78	4096.54	145	3.67218	13.1407
13512.1	USA	5	stool	44	1	40.4297	1	0	0	93	858.22	889.91	159.68	2012.04	3919.85	107	3.0917	10.3252
13512.1	USA	5	stool	52	0	54.1176	1	0	0	95	1130.83	819.86	161.11	1942.98	4054.79	89	1.85468	9.11882
13512.1	USA	5	stool	49	0	19.7826	0	0	0	95	1178.61	615.45	194.66	2900.21	4888.93	134	3.59007	12.4684
13512.2	USA	5	stool	48	1	43.8445	1	0	0	88	327.33	365.36	143.59	703.9	1540.19	185	3.50676	17.1096
13512.1	USA	5	stool	44	1	33.9506	1	0	0	106	740.8	836.16	299.39	1468.27	3344.63	71	2.3167	8.71756
13512.1	USA	5	stool	52	1	29.752	0	0	0	83	1013.41	1199.18	103.56	2469.94	4786.09	135	3.22342	12.5857
13512.1	USA	5	stool	43	0	26.1148	0	0	0	122	1649.76	1223.41	223.77	3645.16	6742.09	128	2.73386	11.9201
13512.1	USA	5	stool	52	0	24.6237	0	1	1	237	684.5	1929.61	303.58	1670.35	4588.04	114	3.42269	11.109
13512.1	USA	5	stool	50	0	25.607	0	0	0	93	2207.58	2645.94	538.74	3564.09	8956.35	179	3.93619	14.256
13512.1	USA	5	stool	41	1	36.2895	1	1	1	276	301.02	471.83	151.05	1716.29	2640.19	171	3.12653	16.5798
13512.1	USA	5	stool	46	0	32.3349	1	0	0	102	930.44	468.75	104.43	1807.26	3310.88	110	3.09189	11.5721
13512.1	USA	5	stool	34	0	20.541	0	0	0	80	811.92	594.3	103.2	1823.18	3332.6	172	3.3447	14.9222
13512.1	USA	5	stool	45	1	36.1842	1	1	1	164	1218.62	2129.62	38.51	5389.67	8776.41	137	3.04422	12.2381
13512.1	USA	5	stool	45	0	28.2206	0	0	0	89	504.86	1685.54	47.49	1272.8	3510.69	172	3.30342	14.0892
13512.1	USA	5	stool	49	0	33.9779	1	1	1	137	543.75	491.65	122.25	1523.22	2680.87	148	3.09075	14.533
13512.2	USA	5	stool	39	0	35.2401	1	0	0	89	1720.95	539.69	106.41	1501.29	3868.35	203	3.86218	18.1544
13512.1	USA	5	stool	42	1	42.5575	1	0	0	86	675.98	796.07	324.06	2366.35	4162.46	241	4.07105	19.4331
13512.2	USA	5	stool	46	0	29.6843	0	0	0	102	762.79	1211.29	411.02	1754.51	4139.6	231	3.7669	19.8987
13512.2	USA	5	stool	50	1	34.6655	1	1	1	77	1671.04	2284.08	206.83	2569.58	6731.54	137	3.34668	12.1125
13512.1	USA	5	stool	43	1	23.128	0	0	0	100	1323.81	1101.82	110.76	3314.87	5851.26	134	3.22886	12.1379
13512.1	USA	5	stool	32	1	56.7879	1	0	0	105	1077.86	3729.7	75.88	4050.51	8933.95	110	3.43885	10.4005
13512.1	USA	5	stool	52	1	23.1221	0	0	0	82	474.85	575.8	152.53	1473.68	2676.86	144	3.02073	14.0015
13512.1	USA	5	stool	32	1	29.4328	0	0	0	99	811.18	398.7	51.42	3837.32	5098.62	65	2.0748	7.75223
13512.1	USA	5	stool	53	1	45.932	1	0	0	89	375.59	272.48	74.55	849.74	1572.36	118	2.45019	12.1091
13512.1	USA	5	stool			33.6333	1	NA	NA	96	630.42	720.3	84.05	1985.32	3420.09	121	3.01619	11.3798
13512.1	USA	5	stool	46	1	27.7775	0	0	0	88	733.39	662.15	117.25	1847.5	3360.28	117	2.31298	11.2273
13512.2	USA	5	stool	48	0	26.8196	0	0	0	99	2415.72	1437.28	146.29	2268.42	6267.71	153	2.79234	13.5415
13512.1	USA	5	stool	51	0	27.7601	0	0	0	98	1843.48	2280.29	304.86	4672.05	9100.67	148	3.5263	13.8912
13512.1	USA	5	stool	42	0	31.8074	1	0	0	89	1191.21	1041.9	37.33	3023.62	5294.05	113	3.27676	10.9354
13512.2	USA	5	stool	50	0	38.1089	1	0	0	92	799.2	571.79	105.88	981.23	2458.1	144	3.32001	13.2534
13512.1	USA	5	stool	47	1	36.2057	1	1	0	144	1643.84	1152.92	268.86	4041.5	7107.11	155	3.69072	14.0888
13512.1	USA	5	stool	51	1	36.289	1	1	1	114	420.77	416.28	60.31	1192.63	2089.99	110	3.10363	11.5514
13512.2	USA	5	stool	47	0	26.1774	0	0	0	97	958.71	1002.23	173.17	1298.42	3432.53	188	3.92488	15.3847
13512.1	USA	5	stool	42	1	32.8837	1	0	0	94	NA	NA	NA	NA	NA	256	4.15077	20.4571
13512.2	USA	5	stool	42	0	29.1047	0	0	0	117	528.61	317.22	63.78	744.95	1654.57	127	3.02917	12.4772
13512.1	USA	5	stool	51	0	54.69	1	1	1	149	871.55	698.27	125.26	2306.3	4001.38	122	3.1039	11.574
13512.2	USA	5	stool	43	1	26.2528	0	0	0	93	801.24	648.95	187.95	1451.25	3089.39	123	2.81379	11.6062
13512.1	USA	5	stool	46	0	29.7433	0	0	0	115	883.4	983.31	123.17	2281.08	4270.96	194	3.62552	16.5617
13512.2	USA	5	stool	37	1	22.3438	0	0	0	91	772.03	572.23	127.05	1023.64	2494.95	127	3.13498	12.1175
13512.1	USA	5	stool	45	0			0	0	116	1012.67	846.3	172.75	2129.44	4161.17	103	2.90623	10.8697
13512.1	USA	5	stool	48	0	21.7034	0	0	0	104	899.7	980.22	323.75	2522.18	4725.86	117	3.19865	12.0438
13512.1	USA	5	stool	38	1	47.3619	1	1	0	216	885.63	2638.45	2.91	5209.51	8736.5	77	2.16757	8.34285
13512.1	USA	5	stool	46	0	31.1531	1	0	0	91	493.37	576.24	158.1	1626.21	2853.92	179	3.44199	16.0606
13512.2	USA	5	stool	50	1	33.1641	1	1	1	161	1352.4	980.46	119.05	1449	3900.91	93	2.61091	8.9702
13512.1	USA	5	stool	49	1	28.9623	0	0	0	116	467.44	447.6	109.69	1081.54	2106.27	177	3.3453	15.1311
13512.2	USA	5	stool	37	1	38.6563	1	0	0	87	1285.31	2536.89	226.58	2112.6	6161.37	84	2.07501	10.4504
13512.1	USA	5	stool	51	1	36.9096	1	0	0	98	369.4	213.93	73.89	975.24	1632.47	124	2.74643	12.4436
13512.1	USA	5	stool	48	1	40.4838	1	1	1	143	1109.72	1353.81	203.49	2764.79	5431.82	162	3.39358	14.4428
13512.1	USA	5	stool	46	0	23.7783	0	0	0	106	982.3	611.92	155.34	2042.07	3791.63	125	2.75719	12.2963
13512.2	USA	5	stool	35	1	31.7432	1	0	0	94	629.34	593.33	205.99	1204.18	2632.85	174	3.19662	15.7065
13512.2	USA	5	stool	38	0	18.8472	0	0	0	68	651.71	651.37	107.63	800.24	2210.95	128	2.93738	13.1808
13512.2	USA	5	stool	45	1	43.4854	1	0	0	107	1124.5	1137.86	121.01	1496.8	3880.18	182	3.24321	15.4508
13512.2	South Africa	2	stool	37	0	16.8	0	0	0	76	252.48	804.59	208.06	965.8	2230.93	285	4.17957	23.1628
13512.2	USA	5	stool	41	1	33.8749	1	0	0	87	2101.51	1253.5	159.21	2199.5	5713.72	139	3.32527	12.9148
13512.1	USA	5	stool	40	0	31.6029	1	0	0	93	706.72	566.11	159.12	994.16	2426.11	158	3.05439	13.7474
13512.2	USA	5	stool	51	0	20.2365	0	0	0	106	516.97	537.93	123.28	713.79	1891.97	140	3.05397	13.3942
13512.2	USA	5	stool	51	1	41.91	1	0	0	91	1363.3	2089.09	643.66	1663.11	5759.16	163	3.86778	13.6879
13512.2	USA	5	stool	42	0	62.2081	1	1	0	164	1243.9	878.68	201.48	1325.84	3649.91	141	2.99926	13.1712
13512.2	USA	5	stool	49	1	59.4307	1	0	0	117	1137.63	994.75	358.78	2111.1	4602.26	210	4.01613	18.3014
13512.2	USA	5	stool	36	1	33.7573	1	0	0	100	803.64	703.03	145.42	1132.71	2784.81	135	3.37352	12.809
13512.2	South Africa	2	stool	53	1	38.84	1	0	0	102	560.03	766.12	137.47	1116.98	2580.61	263	3.89183	22.8881
13512.2	USA	5	stool	55	1	41.8778	1	0	0	79	1400.82	1734.05	374.83	2192.01	5701.72	142	3.17397	13.4687
13512.1	USA	5	stool	39	1	30.4975	1	0	0	88	3360.64	2251.21	582.14	6419.56	12613.5	104	3.11316	11.1554
13512.2	USA	5	stool	43	1	33.1843	1	0	0	95	504.58	386.47	108.5	477.36	1476.91	185	3.62323	14.9136
13512.2	USA	5	stool					NA	NA	NA	1075.52	799.54	135.56	1583.7	3594.32	252	3.88219	20.3721
13512.2	USA	5	stool	37	1	37.4645	1	0	0	99	1634.82	1419.69	71.7	2049.67	5175.88	151	3.20241	14.5042
13512.2	USA	5	stool	45	1	35.5923	1	0	0	104	1360.35	1768.79	76.29	2081.14	5286.56	83	2.82934	9.26916
13512.2	USA	5	stool	33	1	36.102	1	0	0	89	575	2317.06	6.27	2753.87	5652.2	129	3.5363	11.5762
13512.2	USA	5	stool	44	1	35.4925	1	0	0	91	497.93	532	116.12	575.05	1721.1	119	2.24287	12.1433
13512.2	South Africa	2	stool	43	1	20.65	0	0	0	81	618.26	395.04	113.6	1093.61	2220.5	297	3.90033	23.3746
13512.2	USA	5	stool	51	0	34.8654	1	0	0	93	1219.69	2134.81	194.07	1756	5304.57	116	2.69123	11.4285
13512.2	USA	5	stool	43	1	40.6842	1	0	0	78	1827.78	967.27	262.71	1526.77	4584.53	165	3.66143	15.3349
13512.2	USA	5	stool	46	1	22.5364	0	0	0	79	334.17	466.49	178.62	534.59	1513.88	110	1.72621	12.5848
13512.2	USA	5	stool	44	1	47.9751	1	0	0	91	1078.11	1497.95	219.17	1355.66	4150.89	159	3.72939	13.4595
13512.2	USA	5	stool	52	1	22.8201	0	0	0	91	522.51	1234.81	320.81	820.47	2898.6	175	2.66795	15.5962
13512.2	USA	5	stool	43	1	48.1549	1	0	0	91	1031.53	627.41	178.37	1523.77	3361.08	236	4.14407	20.9572
13512.2	USA	5	stool	42	1	22.948	0	0	0	88	639.51	503.42	70.51	1189.65	2403.09	160	3.42696	14.7089
13512.2	USA	5	stool	45	1	34.1124	1	0	0	89	1044.47	648.51	165.4	1766.49	3624.88	178	3.52797	15.4736
13512.2	USA	5	stool	50	1	30.7717	1	0	0	100	243.42	234.34	96.04	361.09	934.89	244	4.12774	20.8661
13512.1	USA	5	stool	52	1	42.0454	1	0	0	89	368.96	292.97	71.7	821.21	1554.83	218	3.19014	17.7105
13512.1	USA	5	stool	46	1	25.8444	0	0	0	88	770.43	658.62	80.22	1874.22	3383.5	131	3.32146	12.5869
13512.2	USA	5	stool	52	1	37.7942	1	1	1	92	598.29	789.21	137.73	907.22	2432.45	120	2.58251	11.6665
13512.2	USA	5	stool	40	1	48.6684	1	0	0	91	753.37	604.11	113.04	1075.93	2546.43	126	3.12631	12.2302
13512.2	USA	5	stool	39	1	43.9151	1	0	0	94	817.87	320.96	66.3	734.02	1939.15	141	3.8134	12.3534
13512.2	South Africa	2	stool	40	0	21.26	0	0	0	86	1160.73	229.95	38.66	1425.63	2854.96	154	2.61539	13.8903
13512.2	USA	5	stool	55	1	27.5453	0	0	0	94	939.3	663.24	523.39	1790.47	3916.4	284	4.12939	23.4219
13512.2	South Africa	2	stool	40	1	44.91	1	0	0	97	2084.88	651.81	188.1	1501.29	4426.08	139	3.33106	13.1249
13512.2	South Africa	2	stool	34	1	36.64	1	0	0	88	410.51	395.92	166.78	706.6	1679.8	341	4.47841	27.0501
13512.1	USA	5	stool	50	0	33.8899	1	0	0	99	562.27	1096.09	108.87	2574.13	4341.36	195	3.51098	17.641
13512.2	USA	5	stool	43	1	53.4188	1	0	0	75	1672.52	1810.56	193	3084.99	6761.07	125	3.35964	11.2815
13512.2	South Africa	2	stool	43	1	50.47	1	0	0	81	892.54	649.39	323.87	1532.76	3398.56	316	4.16114	27.5447
13512.2	South Africa	2	stool	46	1	50.25	1	0	0	103	528.24	398.78	226.96	959.06	2113.05	322	3.31226	25.7437
13512.2	South Africa	2	stool	35	0	24.9	0	0	0	111	789.04	1263.39	298.39	1323.6	3674.41	276	4.02727	21.9138
13512.1	USA	5	stool	40	1	68.2461	1	0	0	91	514.49	512.8	162.95	1638.82	2829.05	190	3.4434	17.3427
13512.2	South Africa	2	stool	46	1	44.61	1	0	0	83	1665.87	1769.23	240.11	2265.43	5940.63	122	2.64602	11.7896
13512.2	USA	5	stool	54	1	27.3439	0	1	1	122	1163.5	613.56	341.2	1289.43	3407.69	131	2.75221	12.3554
13512.2	South Africa	2	stool	42	1	37.32	1	1	1	230	843.38	643.24	230.2	1286.74	3003.55	189	3.35356	16.8292
13512.2	USA	5	stool	49	0	24.664	0	0	0	116	4474.72	1633.59	205.35	3675.32	9988.99	92	2.58433	9.81286
13512.2	USA	5	stool	49	1	34.3061	1	0	0	85	2.45	1.31	0.65	20.44	24.85	65	1.26589	7.36002
13512.2	USA	5	stool	49	1	24.0882	0	0	0	81	711.96	1204.25	37.79	1693.08	3647.08	118	3.20329	11.6716
13512.2	USA	5	stool	38	1	34.3802	1	0	0	88	558.37	482.98	123.94	796.94	1962.23	145	3.46728	13.0999
13512.2	USA	5	stool	47	1	39.4727	1	1	1	189	766.86	696.88	82.33	1216.32	2762.38	95	2.6015	10.4595
13512.2	USA	5	stool	52	1	41.7602	1	1	1	89	2253.07	2627.02	301.96	2885.72	8067.77	183	3.01035	15.8777
13512.2	South Africa	2	stool	36	0	20.06	0	0	0	62	1662.17	758.43	28.13	1667.61	4116.34	108	1.89093	11.2312
13512.2	USA	5	stool	55	1	35.5458	1	0	0	110	1669.2	1268.01	251.09	1480.47	4668.76	141	3.32306	12.3078
13512.2	USA	5	stool	42	1	30.209	1	0	0	99	770.74	853.84	161.58	1404.65	3190.81	151	3.32402	13.6531
13512.2	USA	5	stool	48	0	22.7537	0	0	0	76	2619.04	1400.35	418.66	3269.28	7707.33	131	3.19697	12.6129
13512.1	USA	5	stool	49	1	33.737	1	1	1	102	2676.51	3055.65	297.3	4068.52	10098	158	3.47275	13.0258
13512.1	USA	5	stool	43	1	42.4413	1	0	0	89	712.28	714.57	143.44	2225.23	3795.52	212	3.82774	17.8413
13512.2	South Africa	2	stool	45	1	55.1	1	1	1	101	2639.37	773.38	70.1	1565.72	5048.56	193	3.68771	16.7984
13512.2	USA	5	stool	55	1	35.2754	1	0	0	107	552.46	544.53	59.37	1139.31	2295.66	205	3.23425	17.9593
13512.2	South Africa	2	stool	43	1	41.29	1	0	0	108	281.87	228.19	122.06	628.99	1261.09	330	4.14467	27.6431
13512.1	USA	5	stool	22	1	33.3794	1	0	0	113	547.45	756.42	168.21	1595.28	3067.37	172	3.1849	15.8263
13512.2	South Africa	2	stool	43	1	32.08	1	0	0	80	1130.6	541.23	142.9	1431.17	3245.91	311	4.03279	26.3315
13512.2	South Africa	2	stool	44	1	31.29	1	0	0	103	1248.15	421.86	37.74	855.98	2563.73	133	3.50105	12.3432
13512.2	South Africa	2	stool					NA	NA	NA	952.24	378.77	129.47	1549.24	3009.73	161	3.13209	14.6595
13512.2	South Africa	2	stool					NA	NA	NA	1042.99	984.42	191.01	1642.13	3860.55	331	4.24485	23.9166
13512.2	USA	5	stool	51	0	35.3999	1	0	0	100	1478.45	1676.68	147.89	1824.93	5127.95	241	3.37012	19.4103
13512.2	South Africa	2	stool	44	0	24.27	0	0	0	77	2458.23	2047.76	145.32	2902.2	7553.51	129	3.21466	11.1336
13512.1	USA	5	stool	52	1	62.7734	1	0	0	95	395.96	822.95	239.34	1431.04	2889.29	230	3.91254	19.2105
13512.1	USA	5	stool	46	0	24.0815	0	0	0	93	2029.05	755.98	28.57	3600.12	6413.72	144	3.39002	12.9603
13512.1	USA	5	stool	36	1	35.8997	1	0	0	96	211.05	196.53	66.49	729.63	1203.7	178	3.61801	14.6212
13512.2	USA	5	stool	45	1	45.5567	1	0	0	87	506.62	798.88	135.69	717.98	2159.17	163	3.34995	14.4231
13512.2	South Africa	2	stool	48	1	30.29	1	0	0	91	1095.49	744.36	56.98	915.31	2812.13	120	3.12713	11.4575
13512.2	South Africa	2	stool	42	0	18.52	0	0	0	96	1498.6	1373.53	140.12	1693.08	4705.32	149	3.22289	13.3373
13512.1	USA	5	stool	45	0	37.6843	1	0	0	96	652.64	971.85	13.19	3801.29	5438.98	80	2.44416	8.3681
13512.2	South Africa	2	stool	45	0	17.21	0	0	0	88	1134.67	1274.6	196.95	1738.02	4344.24	256	3.54485	21.5972
13512.2	USA	5	stool	43	1	40.5245	1	1	1	139	555.97	155.36	42.83	864.37	1618.53	105	2.62712	11.5371
13512.1	USA	5	stool	51	0	41.7345	1	1	1	174	1101.94	1856.04	296.84	1355.37	4610.19	205	3.43927	16.1948
13512.1	USA	5	stool	41	0	29.5805	0	0	0	105	1431.97	817.22	5.63	2608.96	4863.78	116	3.23233	11.11
13512.1	USA	5	stool	46	1	51.7913	1	0	0	89	438.18	376.54	75.37	1217.85	2107.95	147	3.40636	12.5655
13512.1	USA	5	stool	50	1	42.9688	1	0	0	89	908.96	657.74	147.78	2550.11	4264.59	214	3.97979	17.3403
13512.2	South Africa	2	stool	46	1	36.21	1	0	0	84	599.03	422.74	83.99	852.68	1958.44	228	3.82155	19.0772
13512.2	South Africa	2	stool	46	1	32.37	1	0	0	105	1422.08	979.58	205.18	1556.73	4163.57	276	4.16236	22.4302
13512.2	USA	5	stool	47	1	24.8591	0	0	0	103	1069.24	764.14	63.96	1094.81	2992.15	143	3.33813	13.5506
13512.2	USA	5	stool	43	0	32.6543	1	0	0	103	533.97	599.49	131.2	697.01	1961.67	161	3.78244	14.3418
13512.2	USA	5	stool	48	1	27.9492	0	1	1	400	417.16	538.37	84.39	1158.03	2197.96	81	1.94088	7.93376
13512.1	USA	5	stool	46	1	44.8394	1	0	0	93	795.62	651.13	71.34	2225.83	3743.92	139	3.24666	13.0951
13512.2	USA	5	stool	48	0	36.6687	1	1	0	151	1170.53	1520.16	76.44	1269.66	4036.78	120	3.01577	12.1651
13512.1	USA	5	stool	44	1	55.0135	1	0	0	117	847.48	1045.43	154.73	2528.19	4575.82	150	3.3861	12.4945
13512.1883a	USA	5	stool	52	1	29.9048	0	0	0	81	832.66	790.52	162.01	783.01	2568.2	125	2.74285	12.9011
13512.1	USA	5	stool	42	1	29.582	0	0	0	84	404.11	306.14	114.03	1362.58	2186.85	223	3.84579	18.7549
13512.1	USA	5	stool	48	1	45.2896	1	1	0	129	948.22	142.08	92.63	1223.26	2406.19	136	3.00578	12.8002
13512.1	USA	5	stool	40	1	40.7346	1	0	0	73	957.11	1233.54	19.57	2645.29	4855.52	155	3.19366	14.24
13512.1	USA	5	stool	42	0	34.1865	1	0	0	84	1604.57	843.65	27.13	3534.06	6009.42	147	3.65204	13.2728
13512.1	USA	5	stool	33	1	22.2178	0	0	0	97	364.77	255.08	46.35	801.69	1467.89	131	2.93053	11.1096
13512.2	USA	5	stool	52	0	26.5118	0	0	0	94	1344.27	1330.88	108.09	1564.22	4347.46	110	3.08179	11.6026
13512.2	USA	5	stool	55	0	26.7778	0	1	1	251	665.2	473.08	117.14	1330.79	2586.21	99	3.01319	10.126
13512.2	USA	5	stool	43	1	49.1429	1	1	1	130	947.25	693.8	39.32	1149.04	2829.41	109	2.96457	10.2461
13512.2	USA	5	stool	41	1	38.1818	1	0	0	80	549.5	648.51	89.29	870.36	2157.66	173	3.57482	14.7665
13512.2	USA	5	stool	43	1	38.6777	1	0	0	97	557.26	622.57	99.33	783.31	2062.47	158	3.22903	14.2782
13512.2	South Africa	2	stool	33	1	29.95	0	0	0	79	882.93	725.67	70.33	1148.44	2827.38	209	3.68004	16.5044
13512.3	South Africa	2	stool	37	0	20.14	0	0	0	90	562.62	438.57	126.08	889.99	2017.26	250	3.25718	19.3555
13512.2	South Africa	2	stool	48	1	57.32	1	0	0	125	1888.96	624.11	66.4	1352.06	3931.54	154	2.90772	12.5895
13512.2	South Africa	2	stool	51	0	19.39	0	0	0	84	856.32	542.33	61.59	1232.65	2692.89	147	3.28928	14.1207
13512.3	South Africa	2	stool	36	0	21.22	0	0	0	108	524.18	245.99	65.26	616.55	1451.98	235	3.29921	19.2706
13512.2	USA	5	stool	45	1	30.5233	1	0	0	90	393.87	604.54	265.01	1140.2	2403.63	249	3.4489	22.9003
13512.2	USA	5	stool	42	1	37.741	1	0	0	94	559.85	566.29	26.25	698.51	1850.89	138	3.24187	13.1104
13512.2	USA	5	stool	52	0	25.3918	0	0	0	99	1564.03	1442.99	177.2	1815.94	5000.16	185	3.67581	16.5175
13512.2	USA	5	stool	55	1	32.5701	1	0	0	88	1157.03	588.06	220.21	811.63	2776.93	119	3.10012	12.0773
13512.2	USA	5	stool	54	1	32.192	1	0	0	97	359.68	222.91	121.19	327.98	1031.76	165	1.98139	16.2618
13512.2	USA	5	stool	52	1	29.2092	0	0	0	90	284.45	419.66	168.66	730.87	1603.65	162	2.31957	15.5182
13512.3	South Africa	2	stool	36	0	22.05	0	0	0	112	1396.94	947.93	68.42	1365.1	3778.38	188	3.72555	13.9603
13512.2	South Africa	2	stool	34	1	29.39	0	0	0	89	1406	1434.2	448.22	2096.12	5384.54	194	3.14087	18.3638
13512.2	South Africa	2	stool	49	1	31.84	1	0	0	105	641.91	474.62	112.73	934.49	2163.75	294	4.32102	23.5302
13512.2	USA	5	stool	39	1	33.5234	1	0	0	89	976.64	1113.46	188.72	1002.81	3281.63	135	2.78641	11.0566
13512.2	South Africa	2	stool	38	0	23.43	0	0	0	120	1539.08	1469.37	156.97	1661.61	4827.03	222	3.27743	16.8345
13512.3	South Africa	2	stool	28	1	34.6	1	0	0	100	1057.41	515.29	86.64	1169.72	2829.06	155	3.41788	14.0606
13512.2	South Africa	2	stool	45	1	46.84	1	0	0	97	544.69	604.11	94.89	1190.1	2433.79	103	2.03274	12.0451
13512.2	South Africa	2	stool	33	1	29.01	0	0	0	80	617.33	743.04	60.19	1253.78	2674.33	240	3.86617	19.1793
13512.2	South Africa	2	stool	37	0	25.41	0	0	0	86	1839.79	1548.51	160.3	1833.92	5382.53	139	3.3899	13.5025
13512.2	South Africa	2	stool	44	0	18.78	0	0	0	99	390.18	477.7	121.98	502.98	1492.83	242	3.31401	20.1501
13512.2	South Africa	2	stool	38	0	21.75	0	0	0	84	1714.85	1206.89	46.78	1893.85	4862.37	193	3.71779	16.3701
13512.2	South Africa	2	stool	34	1	29.7	0	0	0	85	1036.71	1634.25	293.04	1437.02	4401.01	230	3.61523	17.7847
13512.2	South Africa	2	stool	34	0	19.43	0	0	0	87	423.81	699.95	259.15	757.24	2140.15	213	3.59572	19.0586
13512.2	South Africa	2	stool	34	1	32.47	1	0	0	89	531.57	1163.36	220.31	1310.26	3225.51	254	3.87629	19.9668
13512.2	USA	5	stool	55	1	35.7785	1	1	1	128	915.65	535.96	210.68	1039.97	2702.25	86	2.51229	9.59728
13512.2351a	South Africa	2	stool	49	1	27.16	0	0	0	86	401.45	1027.29	219.96	716.64	2365.33	241	3.69361	21.6701
13512.3	South Africa	2	stool	35	1	24.83	0	0	0	91	2145.87	1253.94	145.3	1859.39	5404.49	164	3.48839	15.2155
13512.2	South Africa	2	stool	36	0	40.44	1	0	0	99	2574.68	836.25	60.57	1555.23	5026.73	141	3.50867	12.9149
13512.2	USA	5	stool	48	1	33.4243	1	1	1	111	403.67	316.56	49.54	634.98	1404.74	110	3.05041	9.39609
13512.2	South Africa	2	stool	44	1	42.17	1	0	0	90	588.5	861.97	220.92	1187.85	2859.24	223	3.61715	18.8335
13512.2	USA	5	stool	36	1	30.0865	1	0	0	102	293.14	517.27	136.27	574.15	1520.83	197	3.18274	16.9213
13512.2	USA	5	stool	49	0	25.0916	0	0	0	86	2060.85	1177.87	34.27	2126.08	5399.08	176	2.96849	15.1089
13512.2	USA	5	stool	52	1	42.8985	1	0	0	106	298.31	197.02	91.78	479.01	1066.12	208	3.88131	17.368
13512.2	South Africa	2	stool	49	1	18.97	0	0	0	99	308.3	379.21	118.08	367.38	1172.97	112	2.9815	11.2746
13512.2	South Africa	2	stool	39	1	38.57	1	0	0	95	950.58	1711.85	366.93	1721.54	4750.91	215	3.62044	17.7127
13512.2	USA	5	stool	55	1	36.3507	1	1	1	100	750.22	1557.31	342.73	1236.84	3887.1	196	3.20366	17.4842
13512.2	USA	5	stool	51	1	41.3336	1	0	0	98	1517.82	923.3	63.37	1818.93	4323.43	94	2.77928	9.23714
13512.2	South Africa	2	stool	40	0	18.54	0	0	0	116	851.14	1109.5	128.2	1488.41	3577.25	175	3.32136	15.2722
13512.2	USA	5	stool					NA	NA	NA	566.5	517.71	97.42	632.58	1814.21	100	2.81157	10.0311
13512.3	South Africa	2	stool	25	0	19.22	0	0	0	90	950.76	681.49	147.84	1129.57	2909.66	234	3.31142	18.5855
13512.2	South Africa	2	stool	46	1	36.5	1	0	0	83	594.6	482.32	58.2	1016	2151.11	177	3.14799	15.5189
13512.2	USA	5	stool	55	1	25.5413	0	1	0	182	1621.88	594.87	30.76	1949.28	4196.79	101	3.18674	10.9807
13512.2	USA	5	stool	50	1	31.6992	1	0	0	96	972.57	1164.68	90.41	1498.3	3725.96	153	3.68783	13.6382
13512.2	South Africa	2	stool	41	1	41.88	1	0	0	82	750.22	637.52	263.73	861.82	2513.3	257	3.09802	22.0856
13512.2	USA	5	stool					NA	NA	NA	840.42	855.6	162.06	1420.99	3279.06	139	3.06622	12.8964
13512.2	USA	5	stool			25.3131	0	NA	NA	100	1286.04	1397.93	154.62	1499.8	4338.39	125	3.48928	11.7873
13512.3	South Africa	2	stool	26	1	34.59	1	0	0	73	1754.96	1235.47	98.64	1895.35	4984.41	150	3.59041	13.2343
13512.2	South Africa	2	stool	44	0	23.28	0	0	0	100	188.71	408.67	154.39	750.5	1502.27	316	4.24578	23.7301
13512.2	South Africa	2	stool	44	1	35.94	1	0	0	82	1286.41	1471.57	253.72	1405.1	4416.81	224	4.00927	19.213
13512.3	South Africa	2	stool	44	1	41.06	1	0	0	77	961.11	989.91	94.82	1631.65	3677.49	148	2.96328	14.2384
13512.2677a	South Africa	2	stool	30	1	37.93	1	0	0	75	296.47	33.7	49.66	711.69	1091.52	134	2.8069	11.6691
13512.2	South Africa	2	stool	39	0	18.45	0	0	0	89	774.07	722.16	97.26	1128.67	2722.15	169	2.8805	16.0117
13512.2	South Africa	2	stool	35	0	15.97	0	0	0	83	2140.33	2488.53	321.58	2168.04	7118.46	206	3.79677	17.45
13512.2	South Africa	2	stool	48	1	40.26	1	0	0	87	330.66	204.89	99.25	892.24	1527.03	268	4.20244	22.4288
13512.2	USA	5	stool	55	0	24.1714	0	0	0	107	1042.62	1151.05	117.04	1387.42	3698.14	190	3.27875	16.9276
13512.2	USA	5	stool	54	1	25.8023	0	0	0	93	242.13	331.07	144.25	522.01	1239.45	229	3.3177	20.1572
13512.3	South Africa	2	stool	29	1	41.26	1	0	0	115	1218.4	1126.43	173.71	1706.56	4225.1	179	3.37687	15.1312
13512.3	South Africa	2	stool	25	0	21.9	0	0	0	71	661.51	423.84	252.9	1262.17	2600.41	222	3.69043	19.3156
13512.2	South Africa	2	stool	44	0	18.11	0	0	0	88	2254.92	903.52	21.36	1422.63	4602.43	126	2.37541	12.6233
13512.2	South Africa	2	stool	32	0	23.29	0	0	0	89	943.37	1175.67	235.68	1464.89	3819.61	196	3.49852	16.927
13512.2	South Africa	2	stool	47	1	18.75	0	0	0	86	256.36	312.6	114.31	658.95	1342.22	176	3.12773	15.8825
13512.2	South Africa	2	stool	36	0	21.36	0	0	0	81	1999.86	360.31	136.96	1391.17	3888.3	129	3.39758	11.6421
13512.3	South Africa	2	stool	26	0	30.78	1	0	0	112	91.32	50.25	6.77	324.38	472.73	148	3.16103	13.6401
13512.2	South Africa	2	stool	48	0	23.02	0	0	0	94	808.26	491.33	88.19	1298.27	2686.06	241	3.71935	18.6637
13512.2	South Africa	2	stool	43	0	25.15	0	1	0	172	1249.08	231.93	24.24	1155.79	2661.03	102	2.02237	10.1495
13512.3	South Africa	2	stool	33	1	28.09	0	0	0	80	1209.71	1498.39	85.26	2454.21	5247.57	250	3.43888	19.1834
13512.2	South Africa	2	stool					NA	NA	NA	934.13	631.36	55.6	1155.49	2776.58	260	3.56794	20.4832
13512.3	South Africa	2	stool	26	1	42.78	1	0	0	114	1120.44	850.32	73.64	1321.8	3366.2	235	3.28798	17.8819
13512.3	South Africa	2	stool	37	1	34.73	1	1	0	188	510.68	571.35	208.11	1037.87	2328.01	292	3.91243	24.0441
13512.2	South Africa	2	stool	38	1	48.94	1	0	0	86	2432.36	591.13	128.55	1705.06	4857.11	172	3.18784	15.6149
13512.2	South Africa	2	stool	51	1	24.38	0	0	0	75	1136.89	954.52	180.28	1679.59	3951.28	295	3.95844	22.9687
13512.3	South Africa	2	stool	25	1	26.57	0	0	0	70	1005.1	1144.68	103.4	1694.57	3947.76	129	2.75413	13.0969
13512.3	South Africa	2	stool	29	1	31.12	1	0	0	85	1182.54	1352.42	366.17	1465.19	4366.31	266	3.31203	21.3355
13512.3	South Africa	2	stool	27	1	24.4	0	0	0	76	832.47	1578.85	195.29	1750.01	4356.62	147	2.34818	13.9376
13512.3	South Africa	2	stool	30	1	41.36	1	0	0	90	369.84	625.21	162.27	887.59	2044.91	211	3.43506	17.4225
13512.3	South Africa	2	stool	26	1	21.99	0	0	0	82	889.03	2074.8	287.43	1706.56	4957.82	95	2.51418	9.93369
13512.3	South Africa	2	stool	31	1	34.67	1	0	0	82	431.58	399.44	114.08	773.72	1718.82	156	3.42528	14.3789
13512.2	South Africa	2	stool	52	1	28.52	0	0	0	93	589.79	530.02	172.46	929.09	2221.36	257	2.81972	21.4277
13512.2	South Africa	2	stool	33	1	26.4	0	0	0	93	380.56	683.9	53.26	706.75	1824.47	244	3.53319	19.8136
13512.3	South Africa	2	stool	29	1	35.77	1	0	0	92	774.44	784.15	231.8	1015.85	2806.24	268	3.54054	21.7365
13512.3	South Africa	2	stool	30	1	29.98	0	0	0	73	759.46	1130.39	269.59	1014.95	3174.39	258	3.73417	20.8179
13512.2	South Africa	2	stool	49	0	16.31	0	0	0	72	1589.35	2220.33	56.65	2018.21	5884.53	256	3.56361	19.759
13512.2	South Africa	2	stool	42	0	24.22	0	0	0	92	4262.17	2521.5	88.24	4237.19	11109.1	183	3.63625	16.6836
13512.3	South Africa	2	stool	28	1	38.59	1	0	0	82	640.06	580.36	135.79	1100.35	2456.57	249	2.63504	20.8421
13512.3	South Africa	2	stool	31	0	22.51	0	0	0	91	739.13	386.69	118.03	1118.03	2361.88	248	3.3251	18.6451
13512.3	South Africa	2	stool					NA	NA	NA	2465.63	1334.18	52.52	2440.73	6293.05	121	3.15781	10.4681
13512.2	South Africa	2	stool	34	1	36.99	1	0	0	85	1394.54	1706.14	281.57	2018.21	5400.45	264	3.97607	22.9383
13512.3	South Africa	2	stool	36	0	16.54	0	0	0	65	277.8	1406.72	340.18	1779.98	3804.67	155	2.85936	14.1699
13512.2	South Africa	2	stool	51	1	46.21	1	0	0	85	1456.09	349.76	43.73	996.22	2845.79	153	3.2277	14.0874
13512.2	South Africa	2	stool					NA	NA	NA	1252.41	853.18	36.31	1254.82	3396.72	231	3.49283	18.2229
13512.3	South Africa	2	stool	26	1	24.71	0	0	0	99	837.46	975.19	84.45	967.45	2864.54	232	3.60684	18.8844
13512.3	South Africa	2	stool	31	0	18	0	0	0	85	622.51	985.74	133.12	1815.94	3557.3	81	2.16636	7.92812
13512.3	South Africa	2	stool					NA	NA	NA	1534.46	1222.94	248.57	2177.03	5182.99	158	3.11664	14.9297
13512.3	South Africa	2	stool	28	1	19.63	0	0	0	78	900.12	1453.33	85.41	1787.47	4226.33	146	3.28445	13.0582
13512.2	South Africa	2	stool	40	0	28.36	0	0	0	105	1305.82	823.72	119.61	1461.89	3711.04	190	3.4425	16.2446
13512.3	South Africa	2	stool	39	1	42.05	1	0	0	115	202.57	395.7	100.6	444.4	1143.27	269	4.11377	21.9657
13512.2	South Africa	2	stool	39	0	22.48	0	0	0	78	882.38	428.24	27.29	778.07	2115.97	200	3.76237	15.8891
13512.3	South Africa	2	stool					NA	NA	NA	2652.3	1232.61	51.19	1832.42	5768.53	248	3.37355	18.9974
13512.2	South Africa	2	stool	40	1	27.68	0	0	0	85	1584.54	1331.32	245.05	1538.75	4699.67	221	3.40602	19.8905
13512.3	South Africa	2	stool	27	0	28.04	0	0	0	91	783.12	753.81	132.91	1037.42	2707.27	190	3.33362	17.1193
13512.3	South Africa	2	stool	34	1	38.5	1	0	0	103	266.71	336.35	122.36	833.35	1558.77	160	2.96223	16.718
13512.3	South Africa	2	stool	38	0	20.56	0	0	0	93	1903.74	935.62	11.83	902.12	3753.32	161	3.03968	13.7619
13512.3	South Africa	2	stool	37	0	24.44	0	0	0	101	860.38	945.73	142.19	1541.75	3490.04	186	3.12764	16.215
13512.2	South Africa	2	stool	48	0	23.52	0	0	0	100	837.65	725.23	182.57	1172.42	2917.87	268	3.53977	20.3936
13512.2	South Africa	2	stool	38	1	25.52	0	0	0	84	668.53	339.2	124.78	1622.66	2755.17	228	3.77146	18.277
13512.2	South Africa	2	stool	46	1	26.51	0	0	0	94	1375.87	1475.97	174.52	911.41	3937.78	128	3.06505	11.1909
13512.2	South Africa	2	stool	51	1	29.57	0	0	0	79	2430.51	1477.29	98.21	3332.21	7338.22	156	3.44221	13.5967
13512.2	South Africa	2	stool	43	0	19.2	0	0	0	83	504.77	430	63.14	941.98	1939.89	192	3.12934	17.5098
13512.3	South Africa	2	stool	28	1	38.82	1	0	0	85	463	289.52	144.73	713.79	1611.04	350	4.25152	32.0675
13512.3	South Africa	2	stool	30	1	24.51	0	0	0	72	259.32	128.84	99.33	422.67	910.16	280	3.7674	27.6152
13512.2	South Africa	2	stool	33	1	49.37	1	0	0	81	1105.1	1245.8	276.73	1400.91	4028.53	287	4.19701	22.6646
13512.2	South Africa	2	stool	55	0	29.78	0	0	0	96	2622.73	1809.24	145.7	3338.21	7915.88	130	3.13542	11.6786
13512.3	South Africa	2	stool	45	1	25.35	0	0	0	87	227.89	0.67	50.84	519.91	799.31	200	2.68851	18.9212
13512.3	South Africa	2	stool	36	0	20.23	0	0	0	98	863.34	392.62	20.92	1565.72	2842.6	216	3.83926	17.9203
13512.2	South Africa	2	stool	44	1	43.25	1	0	0	107	1457.75	1606.77	359.8	1875.87	5300.19	194	3.36293	17.4818
13512.3	South Africa	2	stool	33	0	23.64	0	0	0	86	3023.81	908.36	39.88	2150.06	6122.1	113	3.10262	10.8401
13512.3	South Africa	2	stool	25	1	19.87	0	0	0	83	805.86	892.31	72.19	1279.25	3049.6	141	1.4782	12.1465
13512.2	South Africa	2	stool	29	1	29.56	0	0	0	85	844.86	745.9	187.21	1156.69	2934.65	199	3.29592	18.8018
13512.3	South Africa	2	stool	33	0	24.32	0	0	0	85	1406.37	674.67	48.01	1504.29	3633.34	254	3.58657	19.0901
13512.2	South Africa	2	stool	36	1	39.36	1	0	0	90	228.26	164.99	104.98	464.32	962.56	303	3.9838	25.6811
13512.2	South Africa	2	stool	52	0	18.67	0	0	0	121	416.61	213.17	79.4	619.7	1328.88	196	3.40282	17.2251
13512.3	South Africa	2	stool	35	1	47.88	1	0	0	85	1834.8	926.82	119.58	2049.67	4930.88	132	3.0121	11.5841
13512.3	South Africa	2	stool	30	0	17.56	0	0	0	85	790.89	1028.83	194.83	992.92	3007.46	174	3.29042	16.0988
13512.2	South Africa	2	stool	46	1	34.9	1	0	0	114	654.11	660.16	61.69	989.18	2365.14	253	3.6452	21.1682
13512.2	South Africa	2	stool	47	1	26.7	0	0	0	76	440.26	718.86	247.12	1426.08	2832.32	264	3.99119	23.6033
13512.3	South Africa	2	stool	28	1	27.13	0	0	0	92	443.41	468.69	103.07	727.42	1742.59	213	3.69151	19.0476
13512.3	South Africa	2	stool	32	1	44.08	1	0	0	82	659.66	540.35	134.67	1037.57	2372.25	208	3.60734	17.7038
13512.3	South Africa	2	stool	27	1	21.53	0	0	0	71	466.14	329.53	95.66	687.87	1579.2	271	3.97358	27.1857
13512.2	South Africa	2	stool	50	0	14.85	0	0	0	103	1916.68	781.29	43.01	1394.32	4135.3	198	3.14741	18.0381
13512.3	South Africa	2	stool	30	1	35.75	1	0	0	79	1002.33	693.8	120.09	1297.83	3114.05	137	2.61837	12.6525
13512.3	South Africa	2	stool	34	1	24.05	0	0	0	75	574.82	583.66	174.14	1064.69	2397.31	186	3.12198	16.9868
13512.2	South Africa	2	stool	38	1	31.35	1	0	0	90	1296.21	652.69	109.9	1311.01	3369.81	184	2.34917	16.4673
13512.2	South Africa	2	stool	36	1	33.82	1	0	0	106	3313.99	830.75	66.89	2278.91	6490.55	188	3.54659	16.2677
13512.3	South Africa	2	stool	30	1	48.72	1	0	0	107	363.74	612.24	185	709.89	1870.87	293	3.69593	21.8968
13512.2	South Africa	2	stool	44	1	43.18	1	0	0	69	918.42	547.61	103.68	828.41	2398.12	248	3.27194	19.6829
13512.2	South Africa	2	stool	53	1	38.06	1	0	0	92	1056.49	1988.62	713.48	2093.12	5851.71	189	2.19242	17.1381
13512.2	South Africa	2	stool	42	0	20.64	0	0	0	73	375.39	1168.2	385.02	1787.47	3716.08	184	3.49847	15.0132
13512.3	South Africa	2	stool	35	1	29.32	0	1	0	130	1320.61	1007.28	103.33	2482.68	4913.89	288	4.05896	23.1021
13512.3	South Africa	2	stool	30	1	31.44	1	0	0	74	1822.24	988.82	68.57	1519.27	4398.89	179	3.04831	15.5882
13512.3	South Africa	2	stool	43	1	56.08	1	0	0	78	488.13	666.54	125.01	1144.55	2424.23	235	3.76895	18.0417
13512.3	South Africa	2	stool	25	0	20.31	0	0	0	84	2388	1684.59	229.97	1988.24	6290.8	240	3.26164	20.0302
13512.3	South Africa	2	stool	36	1	46.73	1	0	0	92	676.48	479.68	101.14	978.39	2235.68	154	2.40646	14.9282
13512.3	South Africa	2	stool	27	1	38.74	1	0	0	70	470.02	474.62	114.05	1062.59	2121.29	240	3.34984	19.0799
13512.3	South Africa	2	stool	30	1	49.51	1	0	0	88	852.62	895.83	160.97	1408.4	3317.81	228	2.3367	20.8169
13512.2	South Africa	2	stool	47	1	38.21	1	0	0	94	784.6	854.06	334.83	2042.18	4015.66	284	3.92079	23.8143
13512.2	South Africa	2	stool	36	1	30.06	1	0	0	93	335.47	837.13	154.93	1421.28	2748.81	175	3.17194	15.4191
13512.3	South Africa	2	stool	35	0	19.49	0	0	0	86	801.24	989.69	59.58	1476.87	3327.38	257	3.79841	20.3235
13512.2	South Africa	2	stool	48	1	34.93	1	0	0	71	491.09	646.75	46.27	803.84	1987.96	243	3.52916	20.4782
13512.2	South Africa	2	stool	55	1	36.03	1	1	0	129	755.03	828.12	158.83	1292.73	3034.7	208	3.78846	16.7466
13512.3	South Africa	2	stool	34	0	21.6	0	0	0	104	1677.14	776.68	105.52	1517.78	4077.11	168	3.33384	15.8035
13512.2	South Africa	2	stool					NA	NA	NA	485.92	505.84	60.11	1191	2242.86	169	2.70712	16.6701
13512.2	South Africa	2	stool	48	1	19.3	0	0	0	91	412.91	807.67	194.02	1169.42	2584.02	189	3.23213	16.5393
13512.3	South Africa	2	stool	35	1	36.2	1	0	0	78	221.06	295.46	11.39	663.15	1191.05	89	2.84814	9.2096
13512.3	South Africa	2	stool	24	1	28.45	0	0	0	85	192.78	100.4	57.84	466.27	817.29	218	3.49491	18.7136
13512.3	South Africa	2	stool	28	1	30.99	1	0	0	94	881.82	1062.46	169.94	1198.79	3313.01	188	3.75861	17.0493
13512.3	South Africa	2	stool	39	1	34.02	1	0	0	77	468.17	402.3	77	543.73	1491.21	289	3.63912	21.933
13512.2	South Africa	2	stool	35	1	24.52	0	0	0	86	1992.46	1772.96	289.98	1916.32	5971.73	228	3.66311	18.1719
13512.2	South Africa	2	stool	40	0	30.23	1	0	0	101	1986.92	749.42	50.22	1654.12	4440.68	206	3.42982	16.983
13512.3	South Africa	2	stool	27	1	37.35	1	0	0	85	886.63	965.07	176.28	1186.95	3214.93	257	3.28997	20.1821
13512.3	South Africa	2	stool	33	1	25.72	0	0	0	79	930.43	1093.46	138.26	1585.2	3747.35	289	4.03369	22.9327
13512.2	South Africa	2	stool	40	1	44.59	1	0	0	89	2071.94	971.67	67.98	1363.45	4475.04	147	3.51538	13.1105
13512.3	South Africa	2	stool	32	0	18.46	0	0	0	75	1239.47	1529.39	329.73	1456.64	4555.23	134	2.50678	13.2628
13512.3	South Africa	2	stool	27	1	36.25	1	0	0	93	679.06	557.5	157.86	862.42	2256.84	180	3.45274	15.0264
13512.3	South Africa	2	stool	28	1	41.14	1	0	0	88	1183.65	898.9	185.45	1429.83	3697.83	125	2.76597	11.3556
13512.3	South Africa	2	stool	34	0	25.32	0	0	0	94	309.22	359.43	108.19	820.17	1597.01	178	3.61352	14.8933
13512.3	South Africa	2	stool					NA	NA	NA	824.71	402.08	41.03	1103.2	2371.01	192	3.5356	16.3236
13512.2	South Africa	2	stool	47	1	34.9	1	0	0	85	1002.33	1021.79	399.29	1379.48	3802.9	327	4.4741	26.7763
13512.2	South Africa	2	stool	38	1	38.08	1	0	0	94	1541.66	781.07	54.12	1217.22	3594.07	270	3.85445	23.1708
13512.3	South Africa	2	stool	26	0	23.73	0	0	0	94	1003.44	1152.59	64.98	1101.25	3322.26	265	3.54003	20.5215
13512.3	South Africa	2	stool	36	1	26.85	0	0	0	83	605.69	1565.66	500.2	1272.05	3943.6	207	3.42682	19.0311
13512.3	South Africa	2	stool	36	0	21.62	0	0	0	88	613.26	1507.18	312.66	1125.37	3558.48	228	4.26398	18.8471
13512.3	South Africa	2	stool	33	0	32.3	1	0	0	90	2297.43	2108.87	74.51	1654.12	6134.93	179	3.34543	14.9144
13512.3	South Africa	2	stool	36	1	32.58	1	0	0	82	1487.51	664.12	48.01	1550.74	3750.37	263	4.22104	20.9348
13512.3	South Africa	2	stool	36	0	17.48	0	0	0	80	1055.56	965.29	142.9	1582.2	3745.96	203	3.16253	18.4128
13512.3	South Africa	2	stool	41	1	34.67	1	0	0	87	638.4	451.98	114.51	906.62	2111.51	278	4.01117	22.271
13512.3	South Africa	2	stool	31	1	25.84	0	0	0	80	596.45	598.61	140.56	1038.02	2373.63	334	4.69492	24.2332
13512.3	South Africa	2	stool	28	1	25.09	0	0	0	77	915.09	1070.81	16.42	1217.22	3219.54	183	3.70114	15.7383
13512.3	South Africa	2	stool	38	1	54.2	1	0	0	70	817.69	1833.2	55.63	1541.75	4248.26	137	3.20463	12.0426
13512.3	South Africa	2	stool	40	0	24.93	0	0	0	77	444.33	410.21	162.9	597.82	1615.26	258	3.69524	20.9773
13512.3	South Africa	2	stool	34	1	26.23	0	0	0	82	1425.59	586.3	159.85	1201.33	3373.07	221	3.90548	17.6558
13512.3	South Africa	2	stool	30	0	19.3	0	0	0	69	241.57	513.31	155.51	1083.87	1994.27	187	3.7329	15.7544
13512.3	South Africa	2	stool	36	0	20.74	0	0	0	119	543.58	694.46	11.32	1510.28	2759.64	142	3.28312	13.4172
13512.3	South Africa	2	stool	42	0	20.51	0	0	0	71	466.69	533.98	119.15	1230.25	2350.08	239	4.08002	19.5396
13512.3	South Africa	2	stool	39	1	28.88	0	0	0	83	991.98	882.86	208.72	1547.74	3631.3	248	4.0713	19.4767
13512.3	South Africa	2	stool	39	1	48.81	1	0	0	71	784.05	661.7	69.62	1127.77	2643.13	177	2.92996	15.749
13512.3	South Africa	2	stool	30	1	34.9	1	0	0	92	742.65	942.43	31.85	1312.66	3029.59	111	3.03003	10.8643
13512.3	South Africa	2	stool	28	1	24.27	0	0	0	80	394.61	372.84	152.53	502.68	1422.66	177	2.4642	16.6176
13512.2	South Africa	2	stool	45	1	31.78	1	0	0	98	1419.31	1186.89	323.61	1856.39	4786.2	276	4.03598	24.0831
13512.3	South Africa	2	stool	36	1	31.26	1	0	0	71	894.58	571.13	41.69	1000.26	2507.66	253	4.15186	19.1071
13512.3	South Africa	2	stool	32	1	51.1	1	0	0	76	1800.06	2308.26	257.87	2190.51	6556.7	218	3.97496	17.8022
13512.2743a	South Africa	2	stool	25	1	29.37	0	0	0	75	826.74	772.28	250.84	1324.05	3173.91	221	3.911	19.2875
13512.3	South Africa	2	stool	26	0	22.03	0	0	0	82	837.28	797.34	197.35	1290.48	3122.45	226	4.18931	18.2239
13512.3	South Africa	2	stool	31	1	42.11	1	0	0	98	814.36	1056.96	299.15	1233.85	3404.32	302	4.47784	24.5207
13512.3	South Africa	2	stool	37	1	26.67	0	0	0	116	946.33	1081.59	180.64	1347.57	3556.12	246	4.02823	20.086
13512.3	South Africa	2	stool	34	1	24.62	0	0	0	71	628.61	456.6	110.64	922.2	2118.04	175	3.54727	14.716
13512.3	Ghana	1	stool	43	0	26.1246	0	1	0	271	2450	1530	19.7	3170	7169.7	124	2.41031	11.966
13512.3	Ghana	1	stool	34	1	31.1565	1	0	0	100	2010	974	204	4530	7718	250	3.99469	19.6157
13512.3	South Africa	2	stool	31	1	34.5	1	0	0	83	653.93	987.5	130.69	1395.66	3167.78	356	4.03935	25.8027
13512.2	South Africa	2	stool	41	1	27.82	0	0	0	70	67.24	546.07	38.4	986.78	1638.49	186	3.71383	15.595
13512.4	Ghana	1	stool	53	1	22.3214	0	0	0	99	1009.34	2905.43	3.93	3591.11	7509.81	179	3.88201	14.1652
13512.4	Ghana	1	stool	30	1	32.6273	1	0	0	108	1076.01	974.06	292.19	2638.38	4980.65	160	3.24248	13.9727
13512.2	South Africa	2	stool	51	1	44.64	1	0	0	88	299.61	228.63	58.86	496.84	1083.93	154	2.6499	15.2891
13512.4	Ghana	1	stool	27	1	21.8716	0	0	0	105	789.69	1007.54	108.77	2772.6	4678.6	214	4.1852	17.3508
13512.4	Ghana	1	stool	38	1	30.8984	1	0	0	94	1564.94	1300.06	40.04	3951.42	6856.46	217	4.09713	18.0238
13512.3	Ghana	1	stool	41	0	27.7977	0	1	1	120	3235.44	1855.16	75.68	6954.02	12120.3	267	4.00281	21.0736
13512.4	Ghana	1	stool	43	0	26.256	0	0	0	100	2722.07	2287.34	121.23	4648.02	9778.66	170	3.62137	14.0311
13512.3	Ghana	1	stool	48	1			NA	0	NA	1271.21	1605.36	281.57	5053.38	8211.53	309	3.68891	24.072
13512.3	South Africa	2	stool	27	1	25.87	0	0	0	81	736.92	879.56	85.06	1133.61	2835.14	270	4.12613	21.5471
13512.4	Ghana	1	stool	47	1	33.2211	1	0	0	96	871.55	1882.03	270.95	2448.32	5472.85	191	4.2056	16.2287
13512.2	South Africa	2	stool					NA	NA	NA	193.15	230.17	45.31	257.71	726.33	262	3.66461	18.8685
13512.3	Ghana	1	stool	32	1	26.1208	0	0	0	108	1631.98	1465.27	41.77	4524.92	7663.94	217	3.42752	17.6627
13512.3	Ghana	1	stool	36	1	20.2853	0	0	0	102	3221	2749.91	44.3	6362.51	12377.7	224	3.93126	18.9035
13512.4	Ghana	1	stool	50	1	28.6913	0	0	0	102	2909.12	2076.31	35.5	3933.41	8954.34	199	3.53531	16.7278
13512.3	Ghana	1	stool	51	1	27.9967	0	0	0	99	2374.63	1790.4	116.12	5840.06	10121.2	216	3.57133	19.1182
13512.4	Ghana	1	stool	42	1	26.8248	0	0	0	84	1260.47	2052.52	117.7	4792.15	8222.85	154	3.40003	14.4358
13512.4	Ghana	1	stool			23.1677	0	NA	NA	94	2463.53	3060.06	72	4954.29	10549.9	201	3.9878	16.1193
13512.3	Ghana	1	stool	51	1	26.2431	0	0	0	91	1899.78	1299.62	19.93	5107.42	8326.76	219	3.36871	18.1561
13512.3	Ghana	1	stool	33	1	34.4466	1	0	0	116	2450.2	3197.07	84	5245.54	10976.8	219	3.76973	17.7146
13512.4	Ghana	1	stool	28	1	22.9056	0	0	0	92	1700.51	3442.46	120.36	5792.02	11055.3	207	3.85043	17.424
13512.3	Ghana	1	stool	49	0	32.7776	1	0	0	98	2013.12	1739.73	55.87	6800.89	10609.6	223	4.25078	18.1723
13512.4	Ghana	1	stool	27	1	30.1484	1	0	0	92	970.45	712.81	297.1	2517.68	4498.03	355	4.84428	27.7275
13512.3	Ghana	1	stool	55	1	29.9111	0	0	0	97	2598.36	1488.62	58.93	4711.08	8856.98	203	3.48373	16.8215
13512.4	Ghana	1	stool	41	1	25.157	0	0	0	108	1129.35	941.46	193.03	3035.63	5299.46	150	3.0862	14.9862
13512.3	Ghana	1	stool	49	0	23.3547	0	0	0	87	3900.31	2188.21	77.36	7194.23	13360.1	256	4.02498	19.8217
13512.4	Ghana	1	stool	36	0	21.4284	0	0	0	86	2257.59	2171.03	336.72	5041.37	9806.71	350	4.67826	28.2081
13512.3	Ghana	1	stool	41	1	26.3155	0	0	0	108	1259.36	974.06	131.24	3813.3	6177.96	228	3.30531	18.7325
13512.3	Ghana	1	stool	29	1	28.2068	0	0	0	97	1276.77	1553.82	52.14	5404.68	8287.41	243	4.04871	19.3648
13512.3	Ghana	1	stool	35	0	30.9104	1	0	0	97	2181.29	1868.81	87.68	3425.97	7563.74	96	3.30915	9.31318
13512.3	Ghana	1	stool	46	1	40.0828	1	0	0	108	552.64	477.56	123.88	1998.23	3152.31	272	3.56677	23.5627
13512.3	Ghana	1	stool	29	1			NA	0	NA	1624.57	1573.2	158.61	4347.76	7704.15	335	4.52244	23.941
13512.4	Ghana	1	stool	39	0	23.4596	0	1	1	102	1029.34	691.22	238.52	2943.45	4902.54	344	4.39074	26.4206
13512.3	Ghana	1	stool	32	1	40.8494	1	0	0	94	1087.49	2070.14	98.96	4449.85	7706.46	140	3.21722	13.1502
13512.4	Ghana	1	stool	41	1	20.8294	0	0	0	110	1448.26	2338.44	464.79	5065.39	9316.88	274	3.95452	22.6138
13512.4	Ghana	1	stool	35	1	26.7886	0	0	0	97	3.48	0.38	0.42	1686.26	1690.54	52	2.48424	6.91233
13512.4	Ghana	1	stool	33	1			NA	0	NA	988.6	848.94	87.93	4086.54	6012.01	120	3.39653	12.0526
13512.3	Ghana	1	stool	39	0	24.2078	0	0	0	94	2083.5	1652.94	37.67	4590.98	8365.08	267	4.11315	21.5252
13512.4	Ghana	1	stool	28	1			NA	0	NA	611.53	926.92	191.9	2051.08	3781.43	188	3.76715	16.3803
13512.3	Ghana	1	stool	47	0	22.8471	0	NA	0	NA	3766.97	4942.97	195.22	5206.51	14111.7	150	3.48854	13.293
13512.3	Ghana	1	stool	35	0	33.1683	1	0	0	99	3481.39	1486.86	33.08	4215.65	9216.98	100	3.0791	9.16492
13512.4	Ghana	1	stool	35	1			NA	0	NA	1149.35	1852.07	96.56	3095.68	6193.67	153	3.05508	13.4212
13512.4	Ghana	1	stool	23	1			NA	0	NA	1293.81	2378.97	450.04	2998.7	7121.51	359	4.39831	28.772
13512.4	Ghana	1	stool	29	1	32.5482	1	0	0	100	1086.75	1115.03	125.36	2810.13	5137.28	331	4.368	25.0926
13512.4	Ghana	1	stool	25	1	34.5193	1	0	0	118	2742.81	2163.98	53.16	3678.19	8638.14	233	3.59286	18.0163
13512.3	Ghana	1	stool	51	1			NA	0	NA	1832	1840.62	168.62	3972.44	7813.67	241	3.7307	18.0404
13512.4	Ghana	1	stool	29	1	23.4217	0	0	0	94	1521.97	1344.12	203.9	3612.13	6682.12	261	3.89902	20.5853
13512.3	Ghana	1	stool	41	1	34.3122	1	0	0	100	1891.63	1500.07	172.86	3600.12	7164.68	181	3.30378	15.7681
13512.4	Ghana	1	stool	37	1	25.7453	0	NA	0	NA	2238.7	2767.54	380.59	4254.68	9641.5	214	4.02444	17.1627
13512.4	Ghana	1	stool	36	1			1	1	NA	1421.6	1311.96	224.23	3020.62	5978.4	254	4.17836	19.4293
13512.4	Ghana	1	stool	28	1	26.1774	0	NA	0	NA	1093.42	1023.4	306.7	2809.53	5233.05	322	4.6054	26.4818
13512.4	Ghana	1	stool	34	1	29.4013	0	NA	0	NA	970.08	897.84	150.74	2443.22	4461.88	234	3.69826	19.7167
13512.4	Ghana	1	stool	25	1	30.5069	1	0	0	92	2735.4	1360.86	89.52	4038.5	8224.28	221	4.16455	16.1895
13512.4	Ghana	1	stool	40	1			NA	0	NA	1249.36	1800.09	100.39	6044.23	9194.07	160	3.61781	14.9474
13512.3	Ghana	1	stool	36	1	22.5186	0	0	0	99	1281.95	2354.74	111.99	4888.23	8636.91	272	4.29485	20.523
13512.4	Ghana	1	stool	29	1			NA	0	NA	3321.01	3167.11	17.25	3765.26	10270.6	193	3.70946	16.3967
13512.4	Ghana	1	stool	46	1	28.9325	0	0	0	102	3648.07	2656.52	41.46	5536.79	11882.8	176	3.51007	15.1724
13512.4	Ghana	1	stool	31	1			NA	0	NA	1418.63	1350.29	66.54	3083.67	5919.13	155	3.78643	13.2849
13512.4	Ghana	1	stool	29	1	26.0156	0	0	0	103	1217.13	1331.78	99.93	4071.53	6720.38	212	4.19546	17.6709
13512.2	South Africa	2	stool	40	0	23.54	0	0	0	97	537.11	355.03	77.31	888.34	1857.8	205	3.36315	17.038
13512.4	Ghana	1	stool	32	1	23.593	0	0	0	69	1580.13	3609.87	83.24	6221.39	11494.6	164	3.63207	14.6597
13512.3	South Africa	2	stool	28	1	35.17	1	0	0	90	575.37	554.86	38.27	765.18	1933.69	171	3.2487	14.2524
13512.4	Ghana	1	stool	33	1	27.5798	0	0	0	110	1126.39	1651.18	74.04	3702.21	6553.82	304	4.29357	24.8796
13512.4	Ghana	1	stool	39	0	42.5003	1	0	0	89	1972.38	2384.7	277.39	3975.44	8609.9	240	4.18822	19.2365
13512.4	Ghana	1	stool	40	1			NA	0	NA	1268.62	1095.21	268.09	3182.76	5814.67	208	3.59615	17.3518
13512.4	Ghana	1	stool	39	1	22.2241	0	0	0	94	1760.88	1333.54	179.34	3368.92	6642.68	193	3.59978	15.561
13512.4	Ghana	1	stool	46	0	23.8825	0	0	0	95	1771.99	3654.8	82.98	4116.56	9626.34	177	3.2837	15.7421
13512.4	Ghana	1	stool	27	1	36.4663	1	0	0	90	1506.42	2689.12	96.72	4696.07	8988.32	148	3.28042	13.5011
13512.4	Ghana	1	stool	39	1	48.2209	1	0	0	103	1407.89	1193.89	153.65	3227.8	5983.23	248	4.08066	18.9234
13512.4	Ghana	1	stool	41	1	32.6639	1	0	0	92	3198.4	2376.33	39.7	4810.17	10424.6	205	3.82928	16.2497
13512.4	Ghana	1	stool	44	0	20.1607	0	0	0	115	1379.74	1421.21	176.53	4077.53	7055.02	285	4.46513	21.3374
13512.4	Ghana	1	stool	35	1	26.7271	0	0	0	90	872.29	2572.81	61.18	2523.39	6029.66	195	3.57027	15.9367
13512.4	Ghana	1	stool	50	0	24.206	0	NA	0	NA	1357.15	1381.56	255.02	3972.44	6966.17	297	4.25101	21.4177
13512.4	Ghana	1	stool	36	1	35.6206	1	1	0	144	2657.25	4287.43	157.18	6551.67	13653.5	155	3.55822	13.3825
13512.4	Ghana	1	stool	45	0	18.7307	0	0	0	84	2732.07	1923	90.28	3759.26	8504.61	151	3.36075	13.1685
13512.3	South Africa	2	stool	34	1	21.86	0	0	0	68	512.35	370.42	163	962.96	2008.73	274	3.72135	22.5924
13512.3	South Africa	2	stool					NA	NA	NA	600.33	731.61	104.17	1088.81	2524.92	243	4.41343	19.4235
13512.4	Ghana	1	stool	47	1	20.1804	0	NA	0	NA	1011.56	947.62	284.28	2191.6	4435.06	280	4.25513	22.2901
13512.3	South Africa	2	stool	33	1	22.24	0	0	0	102	346.74	650.93	119.33	783.16	1900.16	151	2.35523	12.9676
13512.3	South Africa	2	stool	27	1	27.27	0	0	0	93	1103.62	1595.78	187.82	1250.18	4137.4	218	3.43568	17.6096
13512.3	South Africa	2	stool	25	0	23.36	0	0	0	113	502.92	307.99	141.47	582.69	1535.07	336	4.22362	27.2838
13512.3	South Africa	2	stool	35	0	20.43	0	0	0	83	1346.67	1204.91	267.3	1238.49	4057.37	103	2.78065	10.2627
13512.4	Ghana	1	stool	40	1	18.9071	0	0	0	118	1294.92	1335.75	33.88	2271.77	4936.31	138	3.18388	12.2494
13512.4	Ghana	1	stool	30	1	30.7814	1	0	0	90	2815.04	2014.19	74.3	4266.69	9170.23	254	3.83155	20.2192
13512.4	Jamaica	3	stool	58	1	33.6128	1	0	0	108	360.79	735.57	298.9	941.53	2336.78	270	4.11337	23.2932
13512.3	South Africa	2	stool	29	0	18.88	0	0	0	83	609.2	667.64	123.87	865.42	2266.12	180	2.91201	15.5907
13512.4	Ghana	1	stool	42	0	24.7068	0	0	0	103	368.14	180.18	142.27	1238.87	1929.47	331	4.48161	27.2741
13512.4	Ghana	1	stool	36	0	19.0515	0	0	0	104	2480.94	1837.53	57.5	4633.01	9008.98	196	3.52771	15.9876
13512.4	Ghana	1	stool	37	1	35.1224	1	0	0	100	3527.69	1552.06	64.39	3149.73	8293.87	103	2.30276	9.42865
13512.3	South Africa	2	stool	44	0	27.86	0	0	0	80	906.96	1573.57	113.26	1667.61	4261.4	172	3.36774	14.7396
13512.3	South Africa	2	stool	32	1	39.11	1	0	0	84	1435.57	1549.39	137.96	1895.35	5018.27	308	3.79914	24.165
13512.3	South Africa	2	stool	25	0	18.72	0	0	0	94	1022.48	1610.07	360.82	2022.7	5016.06	295	3.98985	25.0554
13512.4	Ghana	1	stool	37	1	22.1328	0	1	0	954	2132.76	2249.01	24.79	3347.9	7754.46	121	2.87344	11.5986
13512.4	Jamaica	3	stool	43	1	29.9041	0	0	0	94	445.25	491.11	186.27	912.61	2035.25	235	3.63869	18.7158
13512.3	South Africa	2	stool	27	0	19.59	0	0	0	94	2561.74	1824.85	80.42	1886.36	6353.36	224	3.59418	18.0837
13512.4	Ghana	1	stool	45	1	24.4945	0	0	0	102	2869.49	1015.47	211.56	4071.53	8168.04	236	3.7654	18.7685
13512.4	Jamaica	3	stool	46	0	31.2406	1	0	0	101	1927.77	1159.85	120.81	1877.37	5085.79	174	3.68966	15.6752
13512.3	South Africa	2	stool	43	0	18.34	0	0	0	88	275.58	228.41	185.05	510.17	1199.21	267	3.7418	24.7234
13512.4	Ghana	1	stool	45	1	29.2012	0	0	0	99	1607.91	1795.24	89.87	4636.01	8129.04	102	2.2021	10.3431
13512.4	Jamaica	3	stool	45	1	21.5755	0	0	0	90	426.96	318.32	99.86	543.13	1388.27	197	3.18998	18.3876
13512.4	Jamaica	3	stool	33	1			0	0	95	591.09	2074.8	9.37	2148.56	4823.81	93	2.69579	9.91818
13512.4	Ghana	1	stool	44	1	27.5097	0	0	0	67	1315.29	952.47	259.92	4047.5	6575.19	197	2.63169	17.2518
13512.3	South Africa	2	stool	31	0	22.3	0	0	0	75	2044.22	801.96	68.77	1249.88	4164.83	179	3.7394	15.0669
13512.3	South Africa	2	stool	33	0	22.82	0	0	0	76	1326.34	1056.08	28.21	1735.03	4145.66	100	2.47647	8.98263
13512.4	Jamaica	3	stool	48	1	23.7933	0	0	0	91	497.56	756.45	280.04	1210.02	2744.08	164	3.56212	14.855
13512.4	Ghana	1	stool	50	1	28.0757	0	0	0	98	3609.55	1796.56	45.15	4128.58	9579.84	230	3.31842	18.507
13512.3	South Africa	2	stool	26	0	24.95	0	0	0	90	1347.96	1739.11	33.15	1235.35	4355.57	141	2.96297	13.3495
13512.4	Ghana	1	stool	50	1	25.5505	0	1	0	208	868.59	1489.5	100.75	3741.24	6200.08	221	3.76059	18.273
13512.4	Ghana	1	stool	48	0	19.9838	0	0	0	102	1583.46	1718.59	46.38	3179.75	6528.18	167	3.6387	15.1749
13512.3	South Africa	2	stool	32	0	18.1	0	0	0	92	1042.07	505.84	158.65	1275.65	2982.21	281	3.88155	23.1627
13512.4	Jamaica	3	stool	49	1	36.2076	1	0	0	120	1440.93	787.67	117.78	1430.72	3777.1	151	3.11932	14.4333
13512.4	Jamaica	3	stool					NA	NA	NA	961.67	768.76	20.58	1883.36	3634.37	76	1.74549	8.3844
13512.4	Jamaica	3	stool	32	1	31.8844	1	0	0	93	817.69	658.18	42.86	971.95	2490.68	307	3.71185	19.7492
13512.4	Ghana	1	stool	30	1	23.8531	0	0	0	88	1691.99	1950.31	117.04	2751.28	6510.63	231	3.48197	17.6892
13512.3	South Africa	2	stool	35	0	25.51	0	0	0	84	476.86	896.05	230.94	1283.44	2887.29	240	3.66676	19.9217
13512.4	Ghana	1	stool	51	1	28.0138	0	0	0	112	1684.21	1426.94	86.1	4416.82	7614.07	253	3.37739	19.3303
13512.3	South Africa	2	stool	34	0	19	0	0	0	83	2382.45	1330.22	108.12	1471.18	5291.97	216	3.68461	17.4611
13512.4	Ghana	1	stool	46	0	24.8101	0	0	0	92	836.73	640.56	201.66	2444.42	4123.37	245	3.42031	20.2833
13512.3	South Africa	2	stool	31	1	43.09	1	0	0	71	1438.71	882.42	172.71	1610.67	4104.51	164	3.3093	14.9598
13512.3	South Africa	2	stool	40	1	42.66	1	0	0	60	343.04	468.91	273.67	982.88	2068.5	289	4.1938	25.8488
13512.3	Ghana	1	stool	45	0			NA	0	NA	1370	578	38.4	5080	7066.4	135	3.01529	12.1474
13512.3	South Africa	2	stool	25	0	21.87	0	0	0	100	397.38	350.86	113.37	733.87	1595.47	265	3.5364	22.0012
13512.4	Ghana	1	stool	46	1	29.4515	0	0	0	99	1497.53	1345	88.39	3495.03	6425.95	228	3.65721	18.5785
13512.4	Ghana	1	stool	39	0	43.8613	1	1	0	130	1044.9	1425.62	332.94	2875.59	5679.05	172	3.3352	15.7922
13512.5	Seychelles	4	stool	41	1	37.4414	1	0	0	102	NA	NA	NA	NA	NA	91	3.00262	9.19902
13512.5	Seychelles	4	stool	52	1	36.2094	1	0	0	107	NA	NA	NA	NA	NA	124	2.48933	11.9964
13512.5	Seychelles	4	stool	46	1	30.9785	1	0	0	104	NA	NA	NA	NA	NA	126	2.62601	13.8076
13512.5	Seychelles	4	stool	43	0	37.4023	1	0	0	110	NA	NA	NA	NA	NA	77	2.33424	8.37772
13512.5	Seychelles	4	stool	48	0	29.2906	0	1	1	139	NA	NA	NA	NA	NA	134	3.47785	11.9931
13512.5	Seychelles	4	stool	45	1	34.0484	1	0	0	111	NA	NA	NA	NA	NA	68	2.73237	7.56038
13512.5	Seychelles	4	stool	42	0	31.4597	1	1	0	133	NA	NA	NA	NA	NA	83	2.53876	8.62913
13512.5	Seychelles	4	stool	43	0	23.6998	0	0	0	115	NA	NA	NA	NA	NA	182	3.81097	15.2759
13512.5	Seychelles	4	stool	43	1	36.4955	1	1	0	208	NA	NA	NA	NA	NA	101	2.84417	11.1533
13512.5	Seychelles	4	stool	53	1	21.2096	0	0	0	100	NA	NA	NA	NA	NA	109	2.86106	11.5747
13512.5	Seychelles	4	stool	45	1	21.5888	0	0	0	98	NA	NA	NA	NA	NA	81	2.79607	8.63592
13512.4	Ghana	1	stool	36	1	25.5015	0	0	0	100	681.91	1448.53	76.04	2144.16	4350.63	154	2.88492	14.3712
13512.5	Seychelles	4	stool	45	0	23.9926	0	0	0	97	NA	NA	NA	NA	NA	173	3.86634	15.0915
13512.5	Seychelles	4	stool	45	0	29.0812	0	0	0	109	NA	NA	NA	NA	NA	113	1.81282	12.4548
13512.5	Seychelles	4	stool	53	1	22.5832	0	1	0	144	NA	NA	NA	NA	NA	214	3.99983	17.4508
13512.5	Seychelles	4	stool	50	1	27.5987	0	0	0	105	NA	NA	NA	NA	NA	102	2.79717	10.5321
13512.5	Seychelles	4	stool	44	1	35.5678	1	NA	0	NA	NA	NA	NA	NA	NA	135	3.23906	12.6106
13512.5	Seychelles	4	stool	53	1	28.2942	0	0	0	107	NA	NA	NA	NA	NA	116	1.75392	12.3548
13512.5	Seychelles	4	stool	53	0	34.6713	1	1	1	124	NA	NA	NA	NA	NA	133	3.15186	13.0999
13512.5	Seychelles	4	stool	53	1	28.236	0	1	0	151	NA	NA	NA	NA	NA	110	2.96289	11.038
13512.5	Seychelles	4	stool	48	1	35.1148	1	0	0	105	NA	NA	NA	NA	NA	116	3.22112	11.4215
13512.3	Ghana	1	stool	42	1	22.3081	0	0	0	101	2390	1190	30.5	4230	7840.5	127	3.16587	12.43
13512.5	Seychelles	4	stool	41	0	24.0796	0	0	0	102	NA	NA	NA	NA	NA	85	2.46498	8.63158
13512.4	Ghana	1	stool	50	1	23.7237	0	0	0	100	1770.88	1593.91	29.47	2889.1	6283.37	186	3.42994	15.0571
13512.5	Seychelles	4	stool	43	1	39.2215	1	1	0	146	NA	NA	NA	NA	NA	163	3.24763	14.6634
13512.4	Jamaica	3	stool	39	1	24.2694	0	0	0	55	1032.27	1757.14	538.17	1499.8	4827.37	161	2.34634	15.3437
13512.5	Seychelles	4	stool	52	0	28.5029	0	0	0	111	3230	989	49.6	5690	9958.6	94	2.69151	8.96179
13512.5	Seychelles	4	stool	45	1	24.9079	0	0	0	108	606	215	82.1	1370	2273.1	231	3.93765	19.6052
13512.4	Jamaica	3	stool	53	1	33.458	1	0	0	105	1091.79	1003.1	97.42	1787.47	3979.78	97	2.33785	10.2584
13512.5	Seychelles	4	stool	41	1	30.564	1	0	0	113	1280	1410	37	5460	8187	122	2.95226	12.1086
13512.5	Seychelles	4	stool	52	1	25.7759	0	0	0	99	904	370	108	2850	4232	87	1.89224	10.1978
13512.4	Jamaica	3	stool	37	0	22.7027	0	0	0	94	1382.53	1159.41	221.33	1965.77	4729.03	157	3.3672	13.8139
13512.4	Ghana	1	stool	43	1	19.0864	0	0	0	88	1549.01	1374.52	46.78	3167.74	6138.05	174	3.03206	15.6919
13512.3	Ghana	1	stool	42	1	31.468	1	0	0	84	2540	1850	372	4060	8822	252	4.03954	19.6509
13512.3	Ghana	1	stool	57	0	19.2771	0	0	0	86	1440	801	281	2230	4752	295	4.26946	23.1116
13512.5	Seychelles	4	stool	53	0	24.5679	0	0	0	110	1550	335	71.5	2560	4516.5	79	1.97234	8.88913
13512.5	Seychelles	4	stool	53	1	25.924	0	0	0	117	472	165	115	4040	4792	127	3.03733	12.4449
13512.5	Seychelles	4	stool	53	1	42.9349	1	0	0	98	3960	1020	99.9	6410	11489.9	144	3.24939	13.6347
13512.5	Seychelles	4	stool	45	0	42.9349	1	0	0	119	1290	439	25.5	3540	5294.5	56	2.61405	5.90909
13512.3	South Africa	2	stool	26	1	33.61	1	0	0	100	564.84	612.46	94.97	642.17	1914.44	239	3.74231	19.693
13512.5	Seychelles	4	stool	49	1	27.7979	0	1	0	133	1550	1150	32.5	5360	8092.5	113	3.24643	10.9495
13512.3	Ghana	1	stool	44	1	32.0375	1	0	0	113	2080	753	242	4090	7165	72	0.893851	8.92654
13512.4	Ghana	1	stool	35	1	25.2124	0	0	0	94	2524.28	1745.02	81.6	4335.75	8686.65	227	3.56943	18.6026
13512.5	Seychelles	4	stool	53	0	28.3954	0	0	0	117	1860	626	78.4	3090	5654.4	233	3.88966	19.5605
13512.5	Seychelles	4	stool	42	0	24.5447	0	0	0	97	1170	405	90.8	5340	7005.8	60	1.33361	6.50083
13512.3	Ghana	1	stool	46	1	24.3342	0	0	0	102	1349.74	1656.91	208.7	6287.44	9502.79	290	4.09987	23.7381
13512.5	Seychelles	4	stool	52	1	29.5513	0	0	0	125	947	441	102	5560	7050	88	2.71015	9.5852
13512.5	Seychelles	4	stool	51	1	38.2957	1	0	0	95	1370	442	140	2520	4472	205	3.79386	16.677
13512.5	Seychelles	4	stool	41	1	27.4235	0	0	0	120	1400	431	11.9	3610	5452.9	81	2.7191	8.75564
13512.3	South Africa	2	stool	33	1	23.05	0	0	0	84	249.15	511.77	198.93	390.61	1350.46	195	2.42758	20.3086
13512.5	Seychelles	4	stool	53	0	21.201	0	0	0	114	2730	794	35.1	4520	8079.1	135	3.33083	12.1457
13512.5	Seychelles	4	stool	42	1	22.1443	0	0	0	95	973	299	91.8	1330	2693.8	104	1.47641	11.4125
13512.4	Jamaica	3	stool	39	1	34.5525	1	0	0	101	227.53	193.21	91.07	532.49	1044.3	270	3.85677	22.8957
13512.5	Seychelles	4	stool	49	1	28.9402	0	0	0	92	710	674	15.9	2350	3749.9	113	2.81533	11.6273
13512.4	Jamaica	3	stool	43	0	21.1518	0	0	0	89	1052.79	1197.88	153.47	1333.93	3738.08	125	3.13554	11.5402
13512.5	Seychelles	4	stool	49	0	31.048	1	0	0	104	1150	596	131	5030	6907	114	2.98681	11.7675
13512.5	Seychelles	4	stool	49	0	25.1162	0	0	0	120	842	466	216	1410	2934	215	3.86769	17.0453
13512.5	Seychelles	4	stool	49	0	29.881	0	0	0	125	3230	1220	52.8	5880	10382.8	106	2.85017	10.6184
13512.5	Seychelles	4	stool	52	1	26.9823	0	0	0	116	1300	721	43.1	4310	6374.1	86	2.63505	9.72719
13512.5	Seychelles	4	stool	51	0	32.3457	1	1	0	139	3150	411	13.3	2880	6454.3	63	2.05664	7.38975
13512.4	Ghana	1	stool	48	1	35.3568	1	0	0	116	2160.91	1960.89	106.32	4699.07	8927.19	137	3.17527	13.3927
13512.5	Seychelles	4	stool	52	1	37.2506	1	0	0	113	1090	819	36.6	4770	6715.6	78	1.63543	9.77029
13512.5	Seychelles	4	stool	51	1	43.5069	1	1	1	182	907	591	92.5	4730	6320.5	120	2.78423	11.2888
13512.5	Seychelles	4	stool	52	1	28.4008	0	0	0	106	972	442	71.9	2590	4075.9	111	3.12305	11.4174
13512.5	Seychelles	4	stool	52	0	32.0801	1	0	0	101	64.1	106	108	58.8	336.9	67	2.63291	7.66642
13512.4	Jamaica	3	stool	42	1	31.9535	1	0	0	93	1091.23	1633.15	46.27	2144.06	4914.72	170	3.06488	13.9843
13512.5	Seychelles	4	stool	51	1	34.3458	1	1	1	119	914	334	105	1840	3193	129	3.67871	12.0508
13512.5	Seychelles	4	stool	48	1	30.3785	1	0	0	116	1180	657	143	4320	6300	104	2.7566	11.4933
13512.5	Seychelles	4	stool	48	0	24.6751	0	0	0	103	989	1290	6.05	5670	7955.05	62	1.48937	7.50208
13512.4	Jamaica	3	stool	51	0	22.6428	0	0	0	83	893.1	338.55	65.46	1311.61	2608.71	87	2.42319	9.30453
13512.5	Seychelles	4	stool	49	0	26.1419	0	0	0	117	595	427	5.63	2910	3937.63	47	0.884895	6.74123
13512.5	Seychelles	4	stool	42	1	22.5664	0	0	0	123	483	296	102	1000	1881	170	3.12519	15.5013
13512.5	Seychelles	4	stool	32	1	28.737	0	0	0	102	631	212	141	1290	2274	155	2.81995	13.9093
13512.5	Seychelles	4	stool	42	0	36.4533	1	0	0	123	4350	861	54.6	4430	9695.6	214	4.20282	18.2109
13512.5	Seychelles	4	stool	51	1	30.138	1	0	0	108	911	880	48.6	855	2694.6	148	3.41221	14.4521
13512.5	Seychelles	4	stool	44	1	31.8278	1	0	0	104	484	179	122	1200	1985	159	1.4153	14.9851
13512.5	Seychelles	4	stool	38	1	20.3191	0	0	0	91	209	86.9	74.8	804	1174.7	181	2.97406	17.0156
13512.5	Seychelles	4	stool	43	0	37.8143	1	1	0	155	1480	910	290	2650	5330	180	3.7413	15.8369
13512.5	Seychelles	4	stool	44	1	23.7542	0	0	0	104	455	215	105	1290	2065	230	3.67197	20.0157
13512.5	Seychelles	4	stool	37	0			0	0	113	950	379	120	2800	4249	261	4.09208	21.9984
13512.4	Jamaica	3	stool	49	1	23.059	0	0	0	95	NA	NA	NA	NA	NA	142	2.51629	13.8958
13512.4	Ghana	1	stool	35	1	31.2267	1	0	0	98	393.36	210.85	58.98	1178.82	1842.01	190	3.51822	15.845
13512.5	Seychelles	4	stool	50	1	28.0445	0	0	0	105	190	74.2	109	1010	1383.2	246	3.79695	20.145
13512.5	Seychelles	4	stool	41	0			0	0	114	2580	961	33.2	3600	7174.2	193	3.63814	16.6305
13512.5	Seychelles	4	stool	34	1	21.2654	0	0	0	116	757	290	221	1600	2868	245	3.07778	22.949
13512.4	Ghana	1	stool	34	1	31.833	1	0	0	118	1710.14	1957.36	29.76	4209.65	7906.9	165	3.38265	12.7058
13512.5	Seychelles	4	stool	36	0	36.5907	1	0	0	115	522	301	139	1500	2462	280	3.93151	22.6767
13512.5	Seychelles	4	stool	39	0	23.4079	0	0	0	113	5160	1060	58.4	5290	11568.4	138	3.29817	13.4176
13512.5	Seychelles	4	stool	46	0	19.7418	0	0	0	109	2290	565	86.4	3480	6421.4	191	3.7645	17.4388
13512.5	Seychelles	4	stool	40	0	38.0949	1	0	0	118	1140	934	129	2830	5033	111	3.55137	10.9881
13512.5	Seychelles	4	stool	41	0	31.9672	1	0	0	88	1250	856	70.3	2450	4626.3	148	3.45405	14.5579
13512.5	Seychelles	4	stool	43	0	22.221	0	0	0	108	705	431	67.7	2620	3823.7	189	3.87722	16.2578
13512.5	Seychelles	4	stool	43	0	26.8866	0	0	0	125	2250	555	30.4	3880	6715.4	126	3.26937	11.8954
13512.5	Seychelles	4	stool	41	0	32.2957	1	1	0	236	1860	899	51.5	5730	8540.5	92	2.83049	10.125
13512.5	Seychelles	4	stool	42	0	29.952	0	1	0	168	1160	429	90.9	2160	3839.9	157	3.70448	13.598
13512.5	Seychelles	4	stool	48	1	33.0578	1	0	0	117	403	106	128	335	972	116	2.30376	10.6631
13512.5	Seychelles	4	stool	48	1	21.9253	0	0	0	100	1610	739	132	2960	5441	188	3.80405	16.1168
13512.5	Seychelles	4	stool	48	0	29.6048	0	0	0	122	1690	859	261	5770	8580	120	3.47279	10.7582
13512.5	Seychelles	4	stool	47	0	36.3184	1	0	0	122	2580	879	96.6	3990	7545.6	94	2.65333	9.94613
13512.5	Seychelles	4	stool	48	0	55.3206	1	0	0	121	1740	702	45.2	4450	6937.2	81	2.70317	8.71493
13512.5	Seychelles	4	stool	48	0	31.6564	1	0	0	112	876	457	125	2310	3768	124	2.61422	13.39
13512.5	Seychelles	4	stool	48	1	55.7567	1	1	0	142	1120	631	243	2770	4764	192	3.72083	16.6084
13512.5	Seychelles	4	stool	47	0	25.6858	0	0	0	121	1160	581	43.1	3390	5174.1	79	2.06616	7.80486
13512.5	Seychelles	4	stool	47	0	29.4328	0	0	0	122	2460	987	14.4	3570	7031.4	139	3.14337	13.134
13512.5	Seychelles	4	stool	46	1	22.8085	0	1	0	130	930	1360	7.63	4910	7207.63	87	2.03272	9.92938
13512.5	Seychelles	4	stool			22.7469	0	NA	NA	115	1660	1330	99.7	3580	6669.7	103	2.42729	10.9904
13512.2712a	South Africa	2	stool	27	1	35.78	1	0	0	88	453.94	471.54	200.11	876.35	2001.95	238	3.50171	20.7737
13512.5	Seychelles	4	stool	41	0			0	0	108	2160	514	18.8	2790	5482.8	125	3.13353	11.7854
13512.5362.a	Seychelles	4	stool	41	0	30.5864	1	0	0	118	1040	710	99.3	1930	3779.3	186	3.21073	15.3438
13512.5	Seychelles	4	stool	40	0	25.9739	0	0	0	107	1270	455	88.2	2870	4683.2	224	4.06289	18.8813
13512.5	Seychelles	4	stool	44	0	19.5984	0	0	0	100	981	759	275	2720	4735	150	3.06602	14.3687
13512.5	Seychelles	4	stool	46	1	44.6054	1	0	0	95	1310	768	43.1	5100	7221.1	65	2.57586	6.43325
13512.5	Seychelles	4	stool	34	1	26.8898	0	0	0	92	1440	1080	32.7	4380	6932.7	119	2.73445	11.2337
13512.5	Seychelles	4	stool	43	0	28.3419	0	1	0	169	842	701	22.4	3610	5175.4	109	3.19187	9.10348
13512.5	Seychelles	4	stool	46	0	27.0169	0	1	0	190	2100	645	21.8	3900	6666.8	105	3.0636	10.5011
13512.5	Seychelles	4	stool	45	1	28.8955	0	0	0	101	2290	838	99	7390	10617	135	3.3589	12.6434
13512.5	Seychelles	4	stool	44	1	24.958	0	0	0	118	757	515	131	2760	4163	211	3.82269	18.6583
13512.5	Seychelles	4	stool	49	1	61.1909	1	1	1	101	1300	659	175	5550	7684	111	2.4786	12.2962
13512.5	Seychelles	4	stool	38	1	23.8832	0	0	0	110	864	292	61.5	6720	7937.5	76	1.60747	8.99494
13512.5	Seychelles	4	stool	40	1	30.3516	1	0	0	108	603	544	303	560	2010	77	1.1182	9.31562
13512.4	Jamaica	3	stool	45	1	27.8486	0	0	0	80	604.21	482.98	223.34	1558.23	2868.76	177	3.2777	14.9733
13512.5	Seychelles	4	stool					NA	NA	114	1400	1100	9.51	3820	6329.51	97	2.71569	11.0154
13512.5	Seychelles	4	stool	50	1	26.2244	0	0	0	107	1280	619	67.4	2290	4256.4	98	2.83371	10.5336
13512.5	Seychelles	4	stool	37	1	40.1597	1	0	0	102	2180	916	33.5	3960	7089.5	163	2.26695	14.7734
13512.5	Seychelles	4	stool	51	0	37.2307	1	1	0	130	2160	1200	148	4400	7908	203	3.80626	17.2735
13512.5	Seychelles	4	stool	36	1			0	0	90	554	214	97.3	1130	1995.3	146	3.12234	13.8406
13512.5	Seychelles	4	stool	45	1	43.8568	1	0	0	121	2170	517	74	2690	5451	130	3.18198	12.3184
13512.5	Seychelles	4	stool	42	1			0	0	112	345	714	8.93	3790	4857.93	83	2.76873	8.31625
13512.5	Seychelles	4	stool	36	0	22.554	0	0	0	96	2670	1740	159	4360	8929	192	3.98823	16.6142
13512.5	Seychelles	4	stool					NA	NA	123	541	342	152	2060	3095	207	3.64063	18.0949
13512.4	Jamaica	3	stool	34	1	34.1702	1	0	0	98	952.06	970.57	51.09	1473.43	3447.14	130	3.07448	13.0897
13512.5	Seychelles	4	stool	52	1	30.9627	1	1	1	171	1400	568	40.2	3070	5078.2	150	3.20802	13.9764
13512.5	Seychelles	4	stool	42	1	20.4775	0	0	0	106	269	85.3	42.1	764	1160.4	135	1.61839	13.7361
13512.5	Seychelles	4	stool	36	1	31.4027	1	0	0	119	883	782	13.9	3950	5628.9	117	3.26794	10.5341
13512.4	Jamaica	3	stool	44	1	40.6166	1	0	0	93	919.71	886.15	105.47	1408.85	3320.18	91	2.47022	9.75315
13512.5	Seychelles	4	stool	46	1	30.4715	1	0	0	105	710	464	64.7	1850	3088.7	141	2.83867	12.5803
13512.4	Ghana	1	stool	35	1	32.5831	1	0	0	90	1044.16	1624.75	352.65	2548.61	5570.17	200	3.70263	17.1265
13512.4	Jamaica	3	stool	37	0	25.0284	0	0	0	84	991.24	526.06	42.43	1332.29	2892.02	151	3.11839	14.0203
13512.5	Seychelles	4	stool	47	0	31.1765	1	1	1	182	2600	917	109	4000	7626	167	3.35317	14.9698
13512.5	Seychelles	4	stool	44	0	28.4846	0	1	0	285	1570	675	61	3590	5896	143	3.17041	13.042
13512.4	Ghana	1	stool					NA	NA	NA	1896.45	1219	131.19	3894.37	7141.01	190	2.97801	18.3408
13512.4	Jamaica	3	stool	39	0	17.8029	0	0	0	88	731	2037.21	13.38	1914.82	4696.41	210	3.00814	17.6559
13512.6	Seychelles	4	stool	43	0			NA	0	NA	848	409	123	2320	3700	152	3.17504	13.82
13512.6	Seychelles	4	stool	56	0	24.8948	0	0	0	98	945	433	96.8	2430	3904.8	212	3.6872	18.9263
13512.6	Seychelles	4	stool	41	0	32.0351	1	0	0	100	2110	671	17	3360	6158	168	3.71109	13.3457
13512.3	South Africa	2	stool	29	1	32.71	1	0	0	90	310.51	655.55	302.21	692.21	1960.48	361	4.59084	29.9614
13512.6	Seychelles	4	stool			21.5081	0	NA	NA	85	1030	333	125	2410	3898	188	3.65727	16.1587
13512.4	Jamaica	3	stool	50	0	15.3796	0	0	0	87	991.98	2053.25	16.37	2000.23	5061.84	219	3.34083	17.235
13512.4	Jamaica	3	stool	36	1	21.083	0	0	0	83	811.96	938.69	94.08	1953.78	3798.51	161	3.074	13.8871
13512.4	Jamaica	3	stool	50	0			0	0	103	435.46	446.7	149.91	1024.99	2057.05	293	4.20345	21.176
13512.4	Jamaica	3	stool	45	0	25.9617	0	0	0	114	700.87	681.93	119.92	862.87	2365.59	138	3.0056	12.318
13512.5	Seychelles	4	stool	40	1	25.7554	0	1	0	180	713	211	155	2050	3129	162	3.23581	14.5417
13512.5	Seychelles	4	stool	45	1	25.9177	0	0	0	97	1130	619	273	2180	4202	264	3.93052	20.2959
13512.4	Jamaica	3	stool	50	1	36.4836	1	0	0	124	1213.78	1295.26	202.68	1806.95	4518.67	203	3.3474	16.6093
13512.4	Jamaica	3	stool	36	1	32.3962	1	0	0	95	NA	NA	NA	NA	NA	125	2.3647	12.3872
13512.6	Seychelles	4	stool	47	0	26.4125	0	0	0	117	1540	837	241	2650	5268	156	3.66795	14.7604
13512.6	Seychelles	4	stool	35	0	34.1813	1	0	0	105	2230	1020	45.3	4620	7915.3	148	3.29438	13.3384
13512.4	Jamaica	3	stool	45	0	18.3883	0	0	0	101	1365.89	2103.6	163.34	2204	5836.82	155	3.26478	14.9172
13512.6	Seychelles	4	stool	35	0	39.3519	1	0	0	110	2090	1810	18.5	5230	9148.5	133	3.29285	12.4068
13512.2715a	South Africa	2	stool	27	1	34.99	1	0	0	95	463	465.17	152.2	476.46	1556.83	201	3.76551	19.208
13512.3	South Africa	2	stool	34	1	28.59	0	0	0	78	804.56	836.03	268.83	1154.14	3063.56	275	4.19199	22.478
13512.3	South Africa	2	stool	33	1	44.71	1	0	0	60	1606.91	1572.7	258.38	1526.77	4964.75	201	3.8554	15.5566
13512.3	South Africa	2	stool	31	1	33	1	0	0	92	1003.81	1055.21	153.47	1631.65	3844.14	179	3.80478	14.4545
13512.6	Seychelles	4	stool	52	0	33.8866	1	0	0	119	2200	1610	126	4900	8836	159	3.40144	14.8341
13512.3	South Africa	2	stool	27	1	32.78	1	0	0	100	934.68	1310.43	350.62	934.34	3530.08	249	4.01272	19.9204
13512.3	South Africa	2	stool	26	1	35.59	1	0	0	69	1092.71	1055.86	252.04	1083.57	3484.18	282	4.06099	21.2397
13512.4	Jamaica	3	stool	41	0	19.9678	0	0	0	88	1462.37	1933.66	16.5	1829.42	5241.96	280	3.77031	19.8673
13512.4	Jamaica	3	stool	51	1	54.8278	1	0	0	97	622.14	720.62	62.45	902.27	2307.48	103	2.98378	10.2368
13512.6	Seychelles	4	stool	45	0	27.1501	0	0	0	104	201	398	45.9	877	1521.9	211	3.87274	18.5675
13512.5	Seychelles	4	stool	36	1	20.7285	0	0	0	100	1340	473	49.9	3600	5462.9	190	3.68799	16.7127
13512.5	Seychelles	4	stool	52	1	27.6134	0	0	0	98	1720	1150	112	5000	7982	175	3.22078	16.3901
13512.4	Jamaica	3	stool	48	0	20.4932	0	0	0	98	999.19	1651.18	84.09	1064.39	3798.84	96	2.97928	10.1363
13512.6	Seychelles	4	stool	43	0	25.0581	0	0	0	92	974	485	52.4	3790	5301.4	99	2.26491	9.57617
13512.6	Seychelles	4	stool	42	0	18.5235	0	0	0	69	628	466	1.39	2960	4055.39	130	3.28038	12.2312
13512.4	Jamaica	3	stool	48	1	31.5121	1	0	0	124	885.89	880	173.55	1459.64	3399.08	147	3.16642	14.0307
13512.4	Jamaica	3	stool	41	1	24.5242	0	0	0	72	363.93	285.35	121.04	939.43	1709.74	192	3.63871	15.5959
13512.4	Jamaica	3	stool	46	1	18.5574	0	0	0	92	1247.97	1500.15	350.62	2485.68	5584.42	102	1.71951	8.77393
13512.4	Jamaica	3	stool	44	1	31.3048	1	0	0	86	381.86	704.57	107	903.62	2097.05	139	3.18277	12.6106
13512.5	Seychelles	4	stool	43	1	17.8359	0	0	0	117	915	399	74.5	2190	3578.5	141	3.23787	12.6465
13512.6	Seychelles	4	stool	43	0	22.4877	0	0	0	87	2220	661	44.6	3010	5935.6	154	3.61895	12.7375
13512.4	Jamaica	3	stool	52	1	34.7843	1	0	0	85	443.04	415.71	128.32	940.18	1927.25	125	2.69141	12.1069
13512.6	Seychelles	4	stool	54	0	27.5781	0	1	0	215	5620	2460	70.1	5910	14060.1	114	2.41677	11.7549
13512.4	Jamaica	3	stool	46	1	31.3563	1	0	0	96	1263.31	2418.18	606.46	2046.67	6334.62	134	2.99488	12.7886
13512.6	Seychelles	4	stool	37	0	23.1067	0	0	0	98	1500	757	60.3	4610	6927.3	108	2.77837	11.5616
13512.6	Seychelles	4	stool	41	1	28.3704	0	0	0	99	739	309	120	2020	3188	176	3.16632	14.7902
13512.6	Seychelles	4	stool	41	0	30.9367	1	0	0	107	1270	564	55	5630	7519	155	3.35634	12.8174
13512.6	Seychelles	4	stool	38	1	25.2095	0	0	0	100	1180	502	91.7	2870	4643.7	195	3.53436	16.7598
13512.6	Seychelles	4	stool	38	0	31.9008	1	0	0	109	2560	890	140	4680	8270	154	3.49399	13.5373
13512.4	Jamaica	3	stool	34	1	39.9511	1	0	0	82	1381.23	1025.31	120.63	1835.41	4362.58	139	3.14961	13.4899
13512.4	Jamaica	3	stool	50	1	32.1804	1	0	0	89	188.53	576.41	116.76	668.69	1550.38	115	1.88082	11.6647
13512.6	Seychelles	4	stool	41	0	28.7397	0	0	0	108	2300	1260	41.2	4560	8161.2	171	3.61126	15.2165
13512.4	Jamaica	3	stool	45	0	41.0568	1	0	0	95	1235.03	1173.7	70.97	2055.66	4535.36	67	1.83044	8.41287
13512.4	Jamaica	3	stool	46	0	23.2992	0	0	0	91	859.09	1188.43	306.8	1082.07	3436.38	148	3.50602	12.5778
13512.4	Jamaica	3	stool	36	0	24.2348	0	0	0	102	794.77	692.7	145.63	927.3	2560.39	95	2.2078	9.55767
13512.4	Jamaica	3	stool	47	0	27.0469	0	0	0	104	830.07	726.77	112.93	1391.47	3061.24	145	3.4769	14.5357
13512.4	Jamaica	3	stool	53	1	25.7929	0	1	0	141	210.34	6.22	45.33	784.21	1046.1	254	3.96938	21.7803
13512.4	Jamaica	3	stool	46	1	21.9645	0	0	0	99	2205.02	2578.66	149.37	3146.42	8079.47	91	2.24011	8.82181
13512.4041a	Jamaica	3	stool	46	1	31.3756	1	0	0	88	511.79	526.06	159.9	1109.19	2306.94	205	3.27608	17.9393
13512.4	Jamaica	3	stool	36	1	42.0473	1	0	0	105	2899.98	1930.81	24.05	3020.57	7875.4	167	3.68618	15.6738
13512.4	Jamaica	3	stool	47	1	20.9116	0	1	1	138	295.54	21.1	168.08	150.58	635.3	129	1.86461	15.145
13512.4	Jamaica	3	stool	36	0	26.0853	0	0	0	109	551.35	434.83	179.85	935.54	2101.56	213	3.31479	18.4935
13512.4	Jamaica	3	stool	51	0			NA	0	NA	581.29	521.89	131.28	1314.31	2548.76	180	3.24294	14.5575
13512.4	Jamaica	3	stool	46	0	19.1022	0	0	0	99	2776.14	1331.54	94.77	2455.71	6658.15	80	0.821879	8.81283
13512.4	Jamaica	3	stool	52	1	30.6566	1	0	0	102	357.28	408.45	83.76	807.88	1657.37	150	3.33517	13.7026
13512.4	Jamaica	3	stool	33	1	37.0607	1	0	0	109	317.17	211.48	109.47	798.89	1437.01	184	3.34322	16.8626
13512.4	Jamaica	3	stool	47	0	26.4747	0	0	0	107	1021.18	1698.66	28.56	1877.37	4625.78	148	3.21345	14.4703
13512.5	Seychelles	4	stool	51	0	21.7426	0	0	0	51	NA	NA	NA	NA	NA	89	2.91418	9.18508
13512.5	Seychelles	4	stool	40	1	31.4975	1	0	0	9	NA	NA	NA	NA	NA	180	3.83931	15.414
13512.5	Seychelles	4	stool	47	1	23.8733	0	0	0	100	NA	NA	NA	NA	NA	98	2.43326	10.0818
13512.5	Seychelles	4	stool	42	1	29.7575	0	NA	0	NA	NA	NA	NA	NA	NA	127	3.30256	11.169
13512.5	Seychelles	4	stool	52	0	32.0248	1	1	0	138	NA	NA	NA	NA	NA	92	2.98788	9.33892
13512.5	Seychelles	4	stool	49	1	20.3857	0	0	0	101	NA	NA	NA	NA	NA	62	1.36546	7.7862
13512.5	Seychelles	4	stool	52	1	38.7704	1	0	0	105	NA	NA	NA	NA	NA	128	3.1768	11.2292
13512.5	Seychelles	4	stool	50	1	34.2328	1	1	0	148	NA	NA	NA	NA	NA	103	1.96579	11.5864
13512.4	Jamaica	3	stool	40	1	34.9979	1	0	0	116	659.29	889.01	349.1	1281.49	3178.89	250	3.697	21.8351
13512.4	Jamaica	3	stool	51	0	17.7049	0	0	0	98	423.44	547.17	1.66	1875.87	2848.14	77	1.89945	7.68122
13512.4	Jamaica	3	stool	40	1	36.92	1	0	0	100	723.05	1006.84	116.17	1550.74	3396.8	128	2.69883	12.8745
13512.4	Jamaica	3	stool	39	1	32.7555	1	0	0	113	1273.29	1410.68	208.92	1550.74	4443.63	102	3.135	9.55764
13512.4	Jamaica	3	stool	46	0	18.1433	0	0	0	88	3665.17	1811	133.24	3122.45	8731.86	173	3.34638	15.2825
13512.4	Jamaica	3	stool	54	1	33.6471	1	0	0	89	524.55	364.71	149.45	983.48	2022.18	89	2.66413	9.48805
13512.4	Jamaica	3	stool	40	1	23.5172	0	0	0	86	347.48	335.69	39.11	981.68	1703.97	129	2.81038	13.1468
13512.4	Jamaica	3	stool	49	1	27.342	0	0	0	111	1156.29	801.52	205.3	1977.75	4140.87	123	2.21191	13.1491
13512.4	Jamaica	3	stool					NA	NA	NA	494.79	490.01	130.16	1057.8	2172.76	141	2.47726	13.3888
13512.4	Jamaica	3	stool	40	0	23.8938	0	0	0	90	360.05	298.1	84.8	761.28	1504.23	159	3.30282	15.4969
13512.4	Jamaica	3	stool	38	1	38.179	1	0	0	84	1548.87	735.57	129.42	1505.79	3919.65	129	2.63866	12.0951
13512.4	Jamaica	3	stool	41	0	20.0761	0	0	0	92	1013.61	486.27	15.22	1534.26	3049.36	74	2.44732	8.32541
13512.4	Jamaica	3	stool	41	0	20.7883	0	0	0	93	894.94	577.94	105.65	864.37	2442.9	125	2.61733	12.7388
13512.4	Jamaica	3	stool	42	0	28.0175	0	0	0	102	2983.15	1171.5	23.77	2463.2	6641.62	108	2.94635	10.4099
13512.4096.a	Jamaica	3	stool	47	0	25.7233	0	0	0	79	468.73	290.18	67.07	729.67	1555.65	160	2.5306	15.2485
13512.3	South Africa	2	stool	28	0	22.56	0	0	0	108	541.55	506.28	92.8	574.45	1715.08	137	3.1403	14.2022
13512.2	USA	5	stool	38	1	29.2395	0	0	0	83	322.71	216.3	78.79	284.98	902.77	133	3.16661	13.3169
13512.3	South Africa	2	stool	27	1	26.17	0	0	0	115	1393.98	789.43	69.62	1414.09	3667.12	207	3.67536	17.9486
13512.3	South Africa	2	stool	43	1	36.56	1	0	0	86	769.63	517.49	190.93	1318.65	2796.7	287	4.00893	23.5471
13512.2	South Africa	2	stool	37	0	23.23	0	0	0	89	867.22	378.77	67.55	723.08	2036.62	246	3.69115	19.3391
13512.1	USA	5	stool	49	1	29.7302	0	0	0	102	1987.57	1614.62	120.31	3975.44	7697.93	176	3.63931	16.7449
13512.3	South Africa	2	stool	37	0	19.95	0	0	0	97	1181.99	710.72	61.36	1385.93	3339.99	168	3.10334	16.5846
13512.2	South Africa	2	stool	36	0	19.17	0	0	0	102	2600.55	1823.09	289.47	2021.2	6734.31	185	3.68627	17.2071
13512.3	South Africa	2	stool	43	1	39.28	1	0	0	97	662.8	380.97	155.39	898.23	2097.39	298	4.41102	26.3309
13512.3	South Africa	2	stool	30	0	19.11	0	0	0	96	1035.23	921.77	125.78	1175.86	3258.64	167	3.50206	15.9669
13512.1	USA	5	stool	34	0	22.7596	0	0	0	89	428.18	276.31	78.23	1414.52	2197.25	170	3.28243	15.3308
13512.2	South Africa	2	stool	48	0	19.27	0	0	0	75	892.54	382.95	112.81	1035.32	2423.62	83	3.07401	10.0953
13512.1	USA	5	stool	44	1	21.5019	0	0	0	98	484.48	393.72	85.53	1271.6	2235.34	133	2.34733	13.0966
13512.2	South Africa	2	stool	43	1	23.43	0	0	0	82	1008.8	1125.33	67.63	736.26	2938.02	123	2.8282	11.9101
13512.2	South Africa	2	stool	49	0	32.95	1	1	1	210	591.27	1003.32	136.48	1269.96	3001.03	212	3.05871	18.6162
13512.3	South Africa	2	stool	41	0	41.39	1	0	0	103	1131.71	725.89	98.87	1616.66	3573.14	219	3.85636	19.4429
13512.3	South Africa	2	stool	27	1	28.44	0	0	0	105	201.83	167.45	49.99	294.42	713.69	193	3.65535	17.7629
13512.2	South Africa	2	stool	42	0	28.27	0	0	0	109	1213.41	928.8	117.37	1374.99	3634.56	128	3.18596	12.4197
13512.2	South Africa	2	stool	38	0	27.84	0	0	0	91	900.67	648.29	341.45	1552.24	3442.65	279	4.15721	22.4834
13512.3	South Africa	2	stool	32	1	31.59	1	0	0	102	690.89	672.03	209.69	1170.32	2742.93	261	3.69137	22.466
13512.3	South Africa	2	stool	33	0	20.27	0	0	0	90	1806.71	2552.28	181.07	2367.31	6907.37	169	3.49538	15.647
13512.1	USA	5	stool	38	1	46.3744	1	0	0	95	1872.37	3105.88	94.57	5383.66	10456.5	193	3.35543	17.0586
13512.2	South Africa	2	stool	46	0	17.96	0	0	0	81	535.82	463.63	85.24	885.19	1969.88	321	4.3495	26.6274
13512.3	South Africa	2	stool					NA	NA	NA	856.69	1447.17	389.36	1580.7	4273.92	177	3.46079	17.1542
13512.2	South Africa	2	stool	44	0	21.8	0	0	0	86	1320.98	753.15	78.87	934.94	3087.93	225	3.90226	20.7065
13512.3	South Africa	2	stool	42	1	35.6	1	0	0	90	1459.41	929.02	53.56	1574.71	4016.71	265	4.44864	22.3954
13512.2	USA	5	stool	55	1	41.1417	1	1	1	144	1709.12	725.45	148.63	1735.03	4318.23	141	2.83708	15.3648
13512.3	South Africa	2	stool	34	0	22.67	0	0	0	79	1222.65	1385.84	108.04	1405.55	4122.08	185	3.69295	16.4247
13512.2	USA	5	stool	42	1	38.4375	1	0	0	89	387.4	410.87	167.67	1005.66	1971.6	263	4.07421	20.436
13512.2	South Africa	2	stool	49	0	22.87	0	1	0	131	1533.53	549.59	30.86	1435.22	3549.19	144	3.39008	13.5485
13512.2	South Africa	2	stool	46	0	23.21	0	0	0	92	2363.97	1281.85	90.28	1472.98	5209.08	222	3.6266	20.5717
13512.2	USA	5	stool	54	1	32.0606	1	0	0	85	661.87	502.98	303.99	830.36	2299.21	218	3.16561	20.5227
13512.3	South Africa	2	stool	35	0	23.47	0	0	0	104	2506.29	1399.69	173.02	1985.24	6064.24	154	2.95913	14.1617
13512.3	South Africa	2	stool	37	0	20.68	0	0	0	96	284.64	607.62	121.01	942.43	1955.7	182	3.65471	18.8116
13512.2	South Africa	2	stool	49	0	24.97	0	0	0	82	1333.55	1098.51	162.47	1925.31	4519.84	175	3.05426	16.6994
13512.2	South Africa	2	stool	50	0	18.06	0	1	1	255	1311.92	525.4	57.05	1457.84	3352.22	260	3.98784	20.1359
13512.1	USA	5	stool	36	0	28.9346	0	0	0	121	796.36	354.03	46	1963.1	3159.49	248	3.83082	21.1815
13512.2	USA	5	stool	36	1	24.9982	0	0	0	93	1346.11	916.27	216.31	1471.63	3950.32	145	3.25814	14.3371
13512.2	South Africa	2	stool	47	0	20.49	0	0	0	69	260.24	648.73	40.24	1114.28	2063.49	174	2.99435	16.1989
13512.2	South Africa	2	stool	44	0	19.3	0	0	0	106	3454.47	413.29	27.47	1941.79	5837.02	144	3.29322	13.6778
13512.2	South Africa	2	stool	44	0	21.99	0	1	0	134	559.85	545.63	261.18	1094.21	2460.87	306	4.21929	23.8439
13512.3	South Africa	2	stool	39	1	46.32	1	0	0	74	1911.14	2257.7	430.38	2527.63	7126.85	244	2.84963	21.7163
13512.2	USA	5	stool	36	1	28.887	0	0	0	95	474.27	390.65	202.53	1009.85	2077.3	178	3.62636	16.7221
13512.2	USA	5	stool	41	1	27.0359	0	0	0	89	484.81	43.62	105.19	787.36	1420.97	234	2.41329	22.4623
13512.2	South Africa	2	stool	46	0	17.4	0	0	0	88	2158.81	898.24	29.43	1361.2	4447.69	304	4.33903	25.3354
13512.2	South Africa	2	stool	45	0	18.17	0	0	0	80	1398.05	1717.79	33.99	1155.49	4305.32	219	3.78984	18.3582
13512.2	USA	5	stool	36	1	29.9174	0	0	0	97	541	404.06	166.29	717.09	1828.43	193	3.48541	17.7559
13512.3	South Africa	2	stool	39	0	22.58	0	0	0	89	463.37	598.61	61.46	935.24	2058.68	228	3.33162	19.3273
13512.2	South Africa	2	stool	43	0	19.83	0	0	0	108	483.7	128.05	21.32	1147.55	1780.62	128	2.15732	13.7653
13512.2	South Africa	2	stool	48	0	22.21	0	0	0	81	485.73	2341.24	392.92	1992.74	5212.63	298	4.01109	23.1073
13512.2476a	South Africa	2	stool	48	0	23.72	0	0	0	79	1285.12	726.11	170.37	2006.22	4187.82	227	3.17414	18.2741
13512.2	USA	5	stool	39	1	35.0219	1	0	0	93	657.81	840.21	144.33	1461.59	3103.93	99	2.33176	11.2121
13512.2	South Africa	2	stool	36	0	25.9	0	0	0	90	3036.75	2068.2	125.11	2305.88	7535.95	192	3.68754	15.8209
13512.2	South Africa	2	stool	42	0	21.14	0	0	0	83	3800.1	1612.49	47.73	2433.23	7893.54	173	3.13473	15.0744
13512.3	South Africa	2	stool	28	0	19.78	0	0	0	118	1682.32	1136.32	46.3	1583.7	4448.64	183	3.36348	16.6786
13512.2	USA	5	stool	48	1	44.5315	1	0	0	110	872.58	1271.52	150.77	1733.53	4028.41	91	2.628	9.32956
13512.3	South Africa	2	stool	40	0	28.44	0	0	0	92	156.37	46.32	1.08	803.24	1007.01	67	2.14246	8.88688
13512.2	USA	5	stool	46	0	27.8401	0	0	0	114	1623.36	1634.25	218.96	1835.41	5311.98	146	2.93145	15.0143
13512.3	South Africa	2	stool	36	0	25.51	0	0	0	103	1795.99	1224.7	144.51	1916.32	5081.51	183	3.45539	16.9139
13512.2	USA	5	stool	55	1	30.1724	1	0	0	104	2158.81	2719.35	479.05	2755.37	8112.58	169	3.64082	15.5105
13512.2538a	South Africa	2	stool	40	1	32.32	1	0	0	87	1048.91	832.29	131.74	1610.67	3623.61	303	4.02471	24.5109
13512.2	USA	5	stool	51	0	32.4369	1	0	0	80	563.55	688.52	223.04	602.62	2077.72	178	3.32446	16.4242
13512.3	South Africa	2	stool	44	0	20.68	0	0	0	87	318.28	905.72	156.35	1146.2	2526.55	266	3.5528	23.5794
13512.3	South Africa	2	stool	23	0	20.94	0	0	0	92	599.96	547.17	99.79	968.5	2215.41	204	3.64903	17.9813
13512.3	South Africa	2	stool	28	0	19.16	0	0	0	65	1348.89	797.78	119.43	2741.88	5007.98	79	1.72113	10.0935
13512.3	South Africa	2	stool	32	1	34.79	1	0	0	78	687.2	874.5	144.17	1403.01	3108.88	205	3.72732	18.7577
13512.2	USA	5	stool	44	0	23.729	0	0	0	96	1353.51	1001.57	232.52	1973.26	4560.85	157	3.42678	14.9568
13512.3	South Africa	2	stool	26	1	26.54	0	0	0	65	1458.86	1121.38	287.43	3243.81	6111.48	185	2.98459	20.3701
13512.3	South Africa	2	stool	32	0	21.6	0	0	0	99	159.62	745.68	258.38	1094.81	2258.48	205	3.71226	17.7257
13512.3	South Africa	2	stool	28	1	24.44	0	0	0	78	778.13	714.68	167.31	864.07	2524.19	193	3.66276	18.0434
13512.3	South Africa	2	stool	24	1	35.36	1	0	0	83	2343.64	997.83	25.99	2242.95	5610.41	176	2.71872	17.1663
13512.2	USA	5	stool	49	1	34.2544	1	0	0	82	716.4	457.48	155.31	1113.38	2442.57	140	2.90501	14.1011
13512.3	South Africa	2	stool	39	1	21.49	0	0	0	97	647.09	677.53	100.6	1079.82	2505.04	241	3.93651	20.6222
13512.3	South Africa	2	stool	34	1	37.61	1	0	0	124	1516.9	552.22	39.04	1316.7	3424.86	109	2.97944	11.5055
13512.2	USA	5	stool	43	1	40.4092	1	0	0	93	761.87	1561.7	99.53	1345.92	3769.02	162	3.30375	15.1707
13512.3	South Africa	2	stool	45	0	28.76	0	0	0	84	1496.38	364.27	271.12	2578.57	4710.34	166	2.58316	17.9758
13512.3	South Africa	2	stool	29	1	26.19	0	0	0	85	2092.27	1047.29	55.78	2241.45	5436.79	255	4.26152	21.141
13512.3	South Africa	2	stool	44	0	27.3	0	1	0	226	1066.1	897.8	205.13	1618.16	3787.19	264	3.69325	21.1936
13512.3	South Africa	2	stool	25	0	19.27	0	0	0	84	1890.81	857.57	34.25	1414.69	4197.32	118	3.25024	12.4518
13512.2	USA	5	stool	44	1	35.1223	1	0	0	101	1337.61	1423.65	200.39	2962.13	5923.78	116	2.85631	11.1199
13512.3	South Africa	2	stool	26	1	31.84	1	0	0	97	1652.19	732.71	129.88	1794.96	4309.74	141	3.20829	12.8297
13512.3	South Africa	2	stool	29	0	25.37	0	0	0	79	821.75	716.66	154.09	1147.1	2839.6	229	4.04492	20.354
13512.3	South Africa	2	stool	26	1	22.67	0	0	0	74	585.91	261.82	41.25	622.84	1511.83	224	4.00133	19.4665
13512.2	USA	5	stool	50	1	33.179	1	0	0	95	858.16	371.3	147.92	1817.43	3194.82	149	1.66575	14.5207
13512.3	South Africa	2	stool	40	1	42.57	1	0	0	99	670.01	1376.16	140.78	1302.17	3489.13	270	3.67402	20.7709
13512.3	South Africa	2	stool	28	1	46.51	1	0	0	87	2404.63	657.96	27.34	1757.5	4847.44	117	2.95692	11.477
13512.2	USA	5	stool	42	1	37.3303	1	0	0	88	1020.81	2218.13	33.51	2725.4	5997.85	241	3.5341	19.7528
13512.2	USA	5	stool	48	1	31.5029	1	0	0	108	1365.71	921.55	11.54	2599.55	4898.34	71	1.70739	8.71155
13512.3	South Africa	2	stool	27	1	28.01	0	0	0	88	400.16	154.92	36.64	667.64	1259.36	169	3.5119	16.2441
13512.2648a	South Africa	2	stool	32	0	16.67	0	0	0	83	745.97	600.15	41.33	1122.82	2510.28	119	3.05029	11.1251
13512.3	South Africa	2	stool	33	1	28.94	0	0	0	76	498.86	623.67	59.19	922.65	2104.37	121	2.85692	12.9168
13512.3	South Africa	2	stool	30	1	36.5	1	0	0	55	899.57	665.88	366.42	1637.64	3569.51	346	4.33811	29.5119
13512.2	USA	5	stool	54	1	34.1642	1	1	1	273	1160.36	742.82	259.66	1194.74	3357.58	144	2.90819	14.5557
13512.3	South Africa	2	stool	38	0	23.07	0	0	0	90	1169.6	841.97	152.58	1081.02	3245.17	229	4.04003	19.7035
13512.2	USA	5	stool	50	1	29.1189	0	0	0	90	290.18	113.1	90.05	504.33	997.67	229	3.1412	22.8877
13512.3	South Africa	2	stool	26	1	33.57	1	0	0	85	2016.49	1962.46	346.04	1940.3	6265.29	317	4.32047	24.7798
13512.2	USA	5	stool	54	0	30.8782	1	0	0	106	1044.84	913.63	32.57	1649.63	3640.66	180	3.8264	15.2293
13512.3	South Africa	2	stool	25	0	18.58	0	0	0	80	974.05	598.39	42.25	1265.01	2879.7	201	3.16995	18.8086
13512.3	South Africa	2	stool	32	0	25.86	0	0	0	94	818.43	946.39	244.85	1040.42	3050.08	330	4.44627	27.8298
13512.3	South Africa	2	stool	27	1	36.51	1	0	0	82	1097.89	2794.1	70.07	1847.4	5809.46	153	3.13183	15.0266
13512.3	South Africa	2	stool	28	1	30.56	1	0	0	74	1420.42	1268.66	208.77	1301.12	4198.97	290	4.31657	22.3982
13512.2	USA	5	stool	44	1	23.5814	0	1	1	471	664.65	1169.96	284.12	1333.04	3451.76	200	3.38175	18.3249
13512.2	USA	5	stool	51	0	31.8714	1	1	1	124	60.11	23.46	22.78	134.05	240.39	313	3.9576	26.0283
13512.2	USA	5	stool	48	1	28.819	0	0	0	101	456.71	410.43	77.59	697.76	1642.49	225	3.86789	19.8992
13512.3	South Africa	2	stool	30	1	20.97	0	0	0	77	1023.03	880	118.69	1291.38	3313.1	219	2.73358	18.349
13512.3	South Africa	2	stool	34	0	32.13	1	0	0	92	629.16	480.78	161.27	800.54	2071.75	305	4.34637	25.1052
13512.2	USA	5	stool	41	1	27.2313	0	0	0	86	232.89	293.04	138.34	720.98	1385.24	197	3.3679	18.6639
13512.3	South Africa	2	stool	36	1	31.35	1	0	0	92	782.57	621.91	143.41	1248.38	2796.27	80	1.79806	9.95136
13512.2	USA	5	stool	42	1	45.2133	1	0	0	95	2277.1	2369.82	233.28	3612.4	8492.59	111	2.93071	11.8006
13512.3	South Africa	2	stool	25	0	19.77	0	0	0	84	3182.77	1518.84	34.12	1441.66	6177.38	136	2.72799	13.7889
13512.2	USA	5	stool	50	1	45.7689	1	0	0	97	885.7	1316.81	40.34	1708.06	3950.91	152	3.29275	14.3207
13512.3	South Africa	2	stool	31	0	21.1	0	0	0	84	300.9	209.5	82	502.38	1094.78	205	3.64423	21.0458
13512.3	South Africa	2	stool	34	1	37.13	1	0	0	89	1050.39	640.82	133.09	1213.47	3037.76	194	3.72084	16.4802
13512.2	USA	5	stool	44	0	32.1795	1	0	0	83	940.23	1213.27	141.63	1268.91	3564.03	141	3.43696	13.1648
13512.3	South Africa	2	stool					NA	NA	NA	627.31	730.73	336.35	1406.9	3101.3	292	4.31359	26.8643
13512.3	South Africa	2	stool					NA	NA	NA	1825.75	1460.8	98.21	1552.24	4936.99	213	3.60878	18.3268
13512.2	South Africa	2	stool	49	1	19.46	0	0	0	85	862.23	291.5	34.2	749.45	1937.38	246	3.69516	19.9205
13512.2	South Africa	2	stool	30	1	57.37	1	0	0	96	1337.61	2818.28	164.89	2695.44	7016.22	156	3.55616	14.4612
13512.3	South Africa	2	stool	26	1	33.1	1	0	0	74	1021.92	1266.03	200.59	1627.15	4115.69	300	4.10917	23.3781
13512.2	South Africa	2	stool					NA	NA	NA	603.28	676.87	99.22	1200.89	2580.26	164	3.24286	15.5931
13512.2	South Africa	2	stool	32	1	22.14	0	0	0	84	702.72	2268.69	45.36	2460.2	5476.97	181	2.58531	16.8504
13512.3	South Africa	2	stool	30	1	34.52	1	0	0	79	1440.19	632.46	46.27	1438.37	3557.3	200	3.70822	17.1654
13512.3	South Africa	2	stool	29	1	37.06	1	0	0	82	976.45	930.78	208.21	1067.54	3182.98	185	3.4822	17.1915
13512.3	South Africa	2	stool	29	1	32.79	1	0	0	80	358.38	226.65	70.63	403.79	1059.46	135	3.39075	13.7043
13512.3	South Africa	2	stool	27	1	31.02	1	0	0	99	2443.45	1104.67	81.41	2079.64	5709.17	204	3.70268	17.8911
13512.3	South Africa	2	stool	37	0	21.3	0	0	0	94	1052.05	1310.65	188.21	2364.31	4915.22	136	2.93703	12.2049
13512.2	South Africa	2	stool	38	1	30.83	1	0	0	100	509.58	1140.94	297.37	816.87	2764.76	168	3.2366	16.7766
13512.3	South Africa	2	stool	30	1	24.71	0	0	0	84	2195.78	1328.02	104.78	2204	5832.57	133	3.22836	12.914
13512.2	South Africa	2	stool	35	1	28.78	0	0	0	88	338.98	217.37	71.4	490.99	1118.74	187	3.87203	17.5163
13512.3	South Africa	2	stool	31	0	22.61	0	0	0	89	921.19	411.31	152.86	995.77	2481.13	80	2.04924	9.33746
13512.3	South Africa	2	stool	32	0	21.45	0	0	0	90	1107.68	961.78	47.19	1995.73	4112.38	182	3.56375	16.0669
13512.3	South Africa	2	stool	28	1	28.2	0	0	0	89	497.93	1146	169.53	1519.27	3332.73	192	3.80058	16.5101
13512.2	South Africa	2	stool	43	1	18.6	0	0	0	77	417.35	356.79	85.9	645.47	1505.5	258	3.15198	22.2004
13512.3	South Africa	2	stool	32	1	51.68	1	0	0	85	1143.73	701.93	77.16	1234.45	3157.26	246	4.22519	21.3319
13512.3	South Africa	2	stool	28	1	27.26	0	0	0	74	244.34	309.31	45.64	416.98	1016.27	148	3.36141	13.6713
13512.3	South Africa	2	stool	33	1	31.09	1	0	0	87	57.56	15.73	36.64	236.28	346.21	313	4.43441	27.6183
13512.3	South Africa	2	stool	41	1	24.38	0	0	0	89	435.46	1291.09	268.32	1374.84	3369.7	156	2.99282	15.7233
13512.2	South Africa	2	stool	37	1	30.81	1	0	0	86	1051.31	911.21	43.93	886.99	2893.45	160	3.67269	14.2887
13512.2	USA	5	stool	54	0	23.6713	0	0	0	101	721.39	1395.73	46.73	1052.1	3215.96	219	3.26568	18.68
13512.3	South Africa	2	stool	32	1	27.23	0	0	0	75	1874.17	1807.04	306.03	2292.4	6279.64	129	2.86778	12.5244
13512.2	South Africa	2	stool	48	1	29.53	0	0	0	82	489.8	327.33	45.54	976.29	1838.96	133	3.10604	12.4939
13512.2	USA	5	stool	40	0	23.9837	0	1	1	76	1116.19	1357.7	90.94	1394.77	3959.59	155	3.07998	13.628
13512.3	South Africa	2	stool	25	1	25.28	0	0	0	78	1604.14	1630.95	335.59	1679.59	5250.27	210	3.92579	20.6336
13512.3	South Africa	2	stool	25	0	20.25	0	0	0	77	597.92	475.06	124.32	1295.88	2493.19	245	3.97611	21.0824
13512.2	South Africa	2	stool	37	0	17.77	0	0	0	88	949.65	691.16	200.87	1782.97	3624.66	165	2.6829	16.0998
13512.3	South Africa	2	stool	28	1	24.73	0	0	0	74	498.86	314.58	92.57	1028.43	1934.44	333	4.12874	26.3509
13512.2	South Africa	2	stool	34	0	20.5	0	0	0	71	381.86	595.09	158.62	910.07	2045.64	167	3.62357	17.6585
13512.3	South Africa	2	stool	38	0	19.13	0	0	0	96	878.68	863.73	137.75	1377.53	3257.7	357	4.34455	27.7812
13512.2	South Africa	2	stool	40	1	21.97	0	0	0	109	288.15	248.63	137.42	754.84	1429.05	240	3.20394	22.4769
13512.3	South Africa	2	stool	29	1	19.2	0	0	0	90	1125.8	688.96	150.29	1417.84	3382.89	280	4.01961	25.5473
13512.3	South Africa	2	stool	29	0	26.9	0	0	0	123	1171.08	660.16	47.68	1172.87	3051.79	149	3.24037	14.0887
13512.3	South Africa	2	stool	31	1	28.17	0	0	0	82	845.78	864.39	180.51	1150.39	3041.07	229	3.97266	20.6236
13512.3	South Africa	2	stool	40	1	18.05	0	0	0	77	306.45	306.89	79.12	407.09	1099.54	276	4.47161	24.1267
13512.3	South Africa	2	stool	34	1	22.78	0	0	0	76	604.95	847.46	128.55	977.79	2558.75	235	3.79814	19.9336
13512.3	South Africa	2	stool	30	1	33.03	1	0	0	85	1924.08	1090.6	56.59	1637.64	4708.91	205	3.83296	18.6633
13512.3	South Africa	2	stool	28	0	20.89	0	0	0	100	506.43	938.25	17.95	1839.91	3302.55	113	2.8999	11.5476
13512.2	South Africa	2	stool	33	1	37.42	1	0	0	92	1581.4	388.23	45.61	1385.03	3400.27	206	3.96356	19.8675
13512.3	South Africa	2	stool	26	1	34.44	1	0	0	86	1905.59	1316.59	126.85	1505.79	4854.82	254	4.18904	22.5592
13512.2	South Africa	2	stool	47	0	21.44	0	0	0	85	1571.61	2065.34	371.77	1893.85	5902.57	209	3.39271	18.9827
13512.3	South Africa	2	stool	25	0	18.93	0	0	0	78	870.36	1443.87	259.4	1669.1	4242.74	254	4.01339	21.1055
13512.3	South Africa	2	stool	36	0	20.98	0	0	0	98	626.57	635.32	116.58	839.8	2218.27	275	3.94079	23.4875
13512.3	South Africa	2	stool	40	1	41.3	1	0	0	104	1014.71	606.96	66.68	1047.31	2735.67	204	3.63257	17.6345
13512.3	South Africa	2	stool	28	1	34.6	1	0	0	69	1480.3	993.43	29.46	1355.21	3858.4	128	2.17001	13.3012
13512.3	South Africa	2	stool	27	1	26.75	0	0	0	92	1180.14	1104.45	74.71	1163.43	3522.72	278	3.89033	22.6974
13512.2	South Africa	2	stool	50	1	34.35	1	0	0	79	695.88	660.38	158.6	1230.85	2745.71	239	3.70157	21.1302
13512.3	South Africa	2	stool	31	0	22.14	0	0	0	100	2253.07	894.07	252.57	1679.59	5079.3	166	3.37655	15.7723
13512.3	South Africa	2	stool	24	1	28.3	0	0	0	75	1505.07	1447.17	172.41	1576.21	4700.85	252	3.59202	20.6818
13512.2	South Africa	2	stool	33	1	49.16	1	0	0	85	1388.62	1095.65	127.08	1838.41	4449.77	270	3.85421	23.5556
13512.3	South Africa	2	stool	36	0	30.87	1	0	0	100	264.68	135.86	24.92	508.82	934.28	248	3.63247	19.627
13512.3	South Africa	2	stool	35	0	25.52	0	0	0	81	1624.65	664.12	49.66	1345.02	3683.46	261	3.89284	19.2868
13512.2	South Africa	2	stool	48	1	40.74	1	1	1	171	1348.15	917.59	19.88	1522.27	3807.89	198	3.52578	17.2979
13512.3	South Africa	2	stool	28	0	27.73	0	0	0	100	621.4	638.62	138.87	889.54	2288.43	287	4.19868	22.2563
13512.3	South Africa	2	stool	41	0	18.36	0	0	0	80	1480.49	1272.62	427.58	1911.83	5092.51	149	2.39274	15.3165
13512.3	South Africa	2	stool	38	0	22.14	0	0	0	98	2635.67	1500.81	213.31	2382.29	6732.08	197	3.79094	18.0925
13512.3	South Africa	2	stool	29	0	28.85	0	0	0	101	475.38	497.05	132.55	788.7	1893.69	311	4.19819	24.1753
13512.2	South Africa	2	stool	54	1	24.05	0	0	0	88	1126.91	884.39	197.51	1310.26	3519.07	187	3.44446	17.9851
13512.2	South Africa	2	stool	46	1	30.28	1	1	1	201	1221.91	494.19	38.96	1050.16	2805.21	153	3.22924	14.928
13512.2	USA	5	stool	52	0	34.7652	1	1	1	89	1112.67	2040.5	536.89	1706.56	5396.63	158	3.08552	16.5263
13512.3	South Africa	2	stool	28	1	28.7	0	0	0	86	701.06	832.95	110.44	1094.51	2738.95	243	3.61076	19.3482
13512.3	South Africa	2	stool	28	0	19.63	0	0	0	83	2935.09	1201.4	150.31	1860.89	6147.69	263	4.11396	23.209
13512.3	South Africa	2	stool	30	0	23.19	0	0	0	100	418.82	359.43	125.37	673.48	1577.11	211	3.33591	19.6672
13512.2	USA	5	stool	47	0	36.5294	1	0	0	90	741.91	667.64	141.37	992.92	2543.84	111	3.09588	12.393
13512.2	USA	5	stool	47	0	43.8731	1	1	1	147	1138.37	2080.29	280.81	1666.11	5165.57	209	3.47883	18.1151
13512.2	USA	5	stool	52	1	43.5506	1	1	1	92	224.94	290.62	80.09	384.91	980.56	233	3.56958	19.4509
13512.3	South Africa	2	stool	24	0	21.48	0	0	0	94	991.61	1068.18	322.34	1516.28	3898.4	291	4.21229	25.0261
13512.3	South Africa	2	stool	29	0	17.96	0	0	0	76	275.4	466.49	193.74	461.33	1396.95	221	3.56627	23.3148
13512.3	South Africa	2	stool	35	1	20.93	0	0	0	97	276.69	402.08	90.13	764.58	1533.48	163	3.21891	14.9053
13512.3	Ghana	1	stool	49	1	23.2107	0	0	0	85	1560	1810	40.3	4360	7770.3	221	3.98832	19.6251
13512.2	South Africa	2	stool	38	0	22.27	0	0	0	111	1275.69	912.53	58.71	1556.73	3803.67	117	2.68432	13.0861
13512.3	Ghana	1	stool	35	1	30.5007	1	NA	0	NA	2170	1160	31.5	4910	8271.5	334	4.54116	25.3598
13512.3	Ghana	1	stool	43	1	27.2141	0	0	0	82	2650	1230	238	4670	8788	237	4.02769	19.6616
13512.3	Ghana	1	stool	48	1	23.4283	0	0	0	90	4920	1650	56.7	6470	13096.7	205	3.60839	16.7666
13512.3	Ghana	1	stool	42	0	26.5861	0	0	0	107	3450	1150	43.2	5470	10113.2	255	4.02023	21.4284
13512.3	Ghana	1	stool	36	1	27.5791	0	0	0	109	541	194	107	1510	2352	264	3.97177	22.3646
13512.3	Ghana	1	stool	47	0	23.4349	0	0	0	111	4320	1320	29.4	6220	11889.4	162	2.22848	15.6972
13512.3	Ghana	1	stool	40	1	36.9977	1	0	0	104	3680	1040	103	4480	9303	252	3.72348	21.5853
13512.3	Ghana	1	stool	58	0	27.4446	0	0	0	103	2310	1580	280	4860	9030	201	3.49449	17.5543
13512.3	Ghana	1	stool	52	0	22.9401	0	NA	0	NA	2750	1760	77.6	4150	8737.6	233	3.43897	20.4819
13512.3	Ghana	1	stool	50	0	22.1146	0	0	0	80	1360	558	11.6	1600	3529.6	120	3.37656	11.3997
13512.3	Ghana	1	stool	51	0	25.0709	0	0	0	95	4060	1820	34.4	6220	12134.4	123	3.35378	13.3453
13512.3	Ghana	1	stool	43	1	31.1799	1	0	0	118	3830	1940	43.1	5340	11153.1	214	3.99604	17.8724
13512.3	Ghana	1	stool	34	1	24.7195	0	0	0	121	1960	913	204	3970	7047	213	4.18763	17.6599
13512.3	Ghana	1	stool	41	0	20.9359	0	0	0	97	2940	1110	56.8	4430	8536.8	178	3.73011	16.8119
13512.3	Ghana	1	stool	48	1	27.9479	0	1	0	138	2090	564	27	3180	5861	201	3.28524	18.8884
13512.3	Ghana	1	stool	39	1	35.5625	1	1	0	144	953	2760	5.11	4830	8548.11	136	3.44925	12.9006
13512.3	Ghana	1	stool	62	0	26.7466	0	0	0	102	1260	1940	40.4	5070	8310.4	140	3.14875	13.4772
13512.3	Ghana	1	stool	45	0	28.7271	0	0	0	112	2360	658	0.73	5090	8108.73	114	3.18281	11.2571
13512.3	Ghana	1	stool	53	1	26.3508	0	0	0	106	2840	678	8.47	2120	5646.47	179	3.42124	15.5863
13512.3	Ghana	1	stool	46	0	20.3854	0	0	0	109	2220	899	16	4540	7675	155	2.47404	15.7175
13512.3	Ghana	1	stool	47	1	38.23	1	0	0	97	2660	883	39.9	4270	7852.9	163	3.16059	15.8317
13512.3	Ghana	1	stool	52	1	39.1542	1	0	0	95	5020	1560	180	6310	13070	373	4.59525	29.3138
13512.3	Ghana	1	stool	68	0	19.6389	0	NA	0	NA	1080	686	57.5	3410	5233.5	250	4.35118	21.1171
13512.3	Ghana	1	stool	39	1	26.789	0	0	0	94	1680	1140	205	5520	8545	304	3.88445	24.6569
13512.3	Ghana	1	stool	41	0	19.7586	0	NA	0	NA	2740	2100	49.1	5850	10739.1	206	3.76714	17.9258
13512.3	Ghana	1	stool	37	1	18.9215	0	0	0	99	3210	1480	49	4450	9189	197	3.77981	17.6363
13512.3	Ghana	1	stool	37	1	30.9196	1	0	0	102	2900	1820	29.8	4840	9589.8	185	3.81109	15.9775
13512.2	USA	5	stool	47	1	35.5255	1	0	0	94	1711.34	1077.41	205.76	2141.07	5135.58	180	3.63536	16.6801
13512.2	USA	5	stool	41	1	34.4789	1	0	0	94	202.76	165.16	55.5	481.25	904.67	235	3.40771	21.1939
13512.3	Ghana	1	stool	35	0	25.2939	0	0	0	100	3330	1600	50.7	6200	11180.7	180	3.15339	17.1487
13512.2	USA	5	stool	55	0	37.3577	1	0	0	92	611.97	415.93	129.88	699.85	1857.63	163	2.83891	15.8384
13512.3	Ghana	1	stool	43	1	27.3475	0	0	0	118	5390	1880	61.3	5890	13221.3	228	3.97972	19.4687
13512.3	Ghana	1	stool	38	1	33.4243	1	NA	0	NA	1440	742	170	3130	5482	241	3.98155	19.3219
13512.3	Ghana	1	stool	32	1	28.8995	0	0	0	108	1180	630	134	3070	5014	253	4.06448	21.4843
13512.3	Ghana	1	stool	42	1	37.7989	1	NA	0	NA	2430	1480	71.4	4190	8171.4	237	3.60048	20.3479
13512.3	Ghana	1	stool	49	1	30.6986	1	0	0	92	933	491	167	2230	3821	237	3.92102	20.7531
13512.3	South Africa	2	stool	26	0	20.62	0	0	0	90	584.62	310.63	76.75	874.71	1846.7	245	3.93533	19.497
13512.3	Ghana	1	stool	46	1	28.7068	0	0	0	95	5390	1440	22.8	5190	12042.8	143	3.07458	14.0088
13512.3	Ghana	1	stool	48	1			NA	0	NA	1560	960	93.1	4980	7593.1	198	4.07395	17.1752
13512.3	Ghana	1	stool	46	1	26.4356	0	0	0	76	2950	2170	22.8	5320	10462.8	226	3.89553	17.7058
13512.3	Ghana	1	stool	47	1	22.5598	0	0	0	109	5010	1450	78.9	6440	12978.9	221	4.05137	18.0504
13512.3	Ghana	1	stool	43	1	43.3804	1	0	0	103	5150	2270	367	5390	13177	241	3.94335	21.4882
13512.3	Ghana	1	stool	33	0	20.9727	0	0	0	92	4070	1360	93.3	4970	10493.3	247	4.25526	19.5875
13512.3	Ghana	1	stool	52	1	23.8205	0	0	0	99	4070	1790	360	5580	11800	204	4.03744	17.8387
13512.3	Ghana	1	stool	45	0	19.3852	0	0	0	91	3670	1560	113	5480	10823	195	2.85018	16.9745
13512.3	Ghana	1	stool	46	0	22.1434	0	0	0	103	1800	1200	53.8	4140	7193.8	278	3.20963	23.0702
13512.3	Ghana	1	stool	34	1	23.7141	0	0	0	123	1150	431	176	3500	5257	258	4.23751	20.5723
13512.3	Ghana	1	stool	50	1	22.664	0	0	0	100	793	360	118	2000	3271	302	4.33573	24.6331
13512.3	Ghana	1	stool	54	1	34.3941	1	0	0	104	1610	690	2.4	3230	5532.4	113	3.54058	10.9463
13512.3	Ghana	1	stool	44	1	29.723	0	NA	0	NA	1980	868	114	4910	7872	268	4.35658	21.9773
13512.3	Ghana	1	stool	55	0	21.4927	0	NA	0	NA	1360	803	76.4	3630	5869.4	262	4.40562	21.1297
13512.3	Ghana	1	stool	37	1	24.3517	0	NA	0	NA	1440	1140	252	3670	6502	284	4.18737	24.0255
13512.3	Ghana	1	stool	43	0	24.2419	0	0	0	94	1870	807	134	5630	8441	281	4.06096	23.6063
13512.3	Ghana	1	stool	39	1	28.0542	0	0	0	106	2460	1550	107	6030	10147	166	3.33511	15.3132
13512.3	Ghana	1	stool	37	1	23.215	0	0	0	99	3600	1360	101	5200	10261	222	3.83074	17.4542
13512.3	Ghana	1	stool	41	1	18.6678	0	0	0	117	3070	1430	62.7	8100	12662.7	206	3.95692	18.798
13512.3	Ghana	1	stool	49	0	27.8954	0	0	0	120	1670	154	12.4	2280	4116.4	81	1.64611	10.4175
13512.3	Ghana	1	stool	52	1	25.9052	0	1	0	134	3430	1090	81.3	4240	8841.3	310	4.22859	24.3692
13512.3	Ghana	1	stool	43	0	24.8983	0	0	0	87	2270	545	11.2	2310	5136.2	151	3.42905	14.654
13512.3	Ghana	1	stool	50	1	29.9673	0	0	0	113	4380	2200	50.4	5210	11840.4	215	3.6948	18.4119
13512.3	Ghana	1	stool	34	1	37.3857	1	NA	0	NA	2890	1140	42.5	4850	8922.5	210	3.8285	18.4905
13512.2	USA	5	stool	55	0	31.0032	1	0	0	95	1925.92	1137.86	111.51	2352.33	5527.62	140	3.25453	14.7683
13512.1745a	USA	5	stool	53	1	45.9404	1	1	1	221	374.65	515.73	130.01	549.73	1570.11	234	3.86482	19.9112
13512.3	Ghana	1	stool	40	1	25.0331	0	0	0	102	1600	941	127	4720	7388	300	4.62713	24.14
13512.3	Ghana	1	stool	49	1	23.4285	0	0	0	101	1810	902	83.2	4580	7375.2	258	3.38869	21.5836
13512.3	Ghana	1	stool	53	0	24.3358	0	1	0	134	3740	1990	54.5	5410	11194.5	283	4.05048	22.2187
13512.3	Ghana	1	stool	56	0	29.9025	0	0	0	105	4390	1980	46.1	4900	11316.1	231	3.89215	18.0644
13512.3	Ghana	1	stool	46	0	27.8223	0	0	0	102	1870	480	41.8	3470	5861.8	149	3.90802	13.2038
13512.3	Ghana	1	stool	54	0	23.463	0	0	0	88	1660	621	130	3810	6221	219	3.80846	19.141
13512.3	Ghana	1	stool	46	1	17.8223	0	0	0	88	3950	1040	59.6	4610	9659.6	186	3.53543	15.5151
13512.3	Ghana	1	stool	44	1	30.2677	1	0	0	89	2330	1180	55.5	5090	8655.5	162	3.65359	16.0398
13512.3	Ghana	1	stool	44	0	23.3853	0	0	0	79	983	697	178	2500	4358	242	4.00737	20.2337
13512.3	Ghana	1	stool	44	1	52.9436	1	0	0	90	2450	1060	179	4600	8289	254	4.35387	21.0236
13512.2	USA	5	stool	49	1	29.2752	0	0	0	96	321.79	488.47	112.04	531.3	1453.6	239	3.67887	18.9246
13512.3	Ghana	1	stool	38	1			NA	0	NA	1480	687	139	3460	5766	251	3.99314	20.3304
13512.3	Ghana	1	stool	55	1	29.1438	0	0	0	96	1270	1380	109	4340	7099	240	4.25622	19.803
13512.3	Ghana	1	stool	31	1	24.3496	0	0	0	107	4590	607	68.4	6020	11285.4	171	3.29199	15.6842
13512.3	Ghana	1	stool	51	1	30.5997	1	0	0	116	3210	2250	63.8	6450	11973.8	206	3.90417	17.8633
13512.3	Ghana	1	stool	34	1	21.4459	0	0	0	98	2020	1050	142	4800	8012	258	4.08994	20.3361
13512.3	Ghana	1	stool	30	1	31.5181	1	1	0	196	1853.48	1511.53	158.91	4557.95	8081.87	308	4.37899	23.5782
13512.2	USA	5	stool			24.426	0	1	NA	300	1071.83	2068.64	25.74	1875.87	5042.07	240	3.49121	19.7734
13512.3	Ghana	1	stool	33	1	35.5748	1	0	0	109	1918.3	4160.55	110.56	4825.18	11014.6	160	3.55348	14.9293
13512.3	Ghana	1	stool	46	1			NA	0	NA	2749.85	1606.69	51.88	5903.11	10311.5	309	4.49901	24.4592
13512.3	Ghana	1	stool	41	0	18.9992	0	0	0	99	569.3	1403.15	3.96	4284.71	6261.13	151	3.18928	14.7778
13512.3	Ghana	1	stool	30	1			NA	0	NA	3680	2110	46.4	4710	10546.4	175	3.35964	17.0052
13512.2	USA	5	stool	50	1	38.7595	1	0	0	86	844.3	913.19	146.42	1250.63	3154.54	200	3.80002	18.4443
13512.3	Ghana	1	stool	35	1	28.917	0	0	0	94	2102.39	2259.14	119.7	5786.01	10267.2	203	3.58493	16.8144
13512.2	USA	5	stool	52	1	40.1231	1	1	1	147	930.25	454.84	174.42	896.88	2456.39	246	3.58408	19.2632
13512.2	USA	5	stool	46	0	32.6857	1	1	0	132	499.22	1521.47	361.58	970.75	3353.03	219	3.66789	19.2265
13512.3	Ghana	1	stool	38	1	33.1155	1	0	0	99	2350	794	125	4190	7459	355	4.45866	28.3532
13512.3	Ghana	1	stool	43	1	31.2394	1	0	0	100	1777.55	1441.04	182.91	4957.29	8358.8	279	3.73174	23.2023
13512.3	Ghana	1	stool	38	1	25.3516	0	0	0	101	2014.98	2231.83	163.15	6344.49	10754.5	227	3.72248	20.3662
13512.3	Ghana	1	stool	37	1			NA	0	NA	1140	756	158	3960	6014	274	3.84306	21.9814
13512.3	Ghana	1	stool	41	1	24.3654	0	0	0	114	992.67	1433.55	314.56	4359.78	7100.56	301	4.4805	25.2119
13512.3	Ghana	1	stool	53	0	19.6628	0	0	0	98	4490	2030	15.5	4960	11495.5	176	3.58035	14.8497
13512.2	USA	5	stool	46	1	18.2828	0	0	0	84	424.55	263.14	6.33	1040.57	1734.6	54	2.09289	7.79697
13512.2	USA	5	stool	52	1	42.8478	1	0	0	115	946.33	805.25	109.8	941.98	2803.36	175	3.48323	15.988
13512.3	Ghana	1	stool	39	1	29.9734	0	0	0	99	738	518	193	2400	3849	289	4.1036	25.8504
13512.2	USA	5	stool	47	1	30.8874	1	0	0	118	606.43	584.76	132.33	654.76	1978.27	95	2.36429	10.6306
13512.3	Ghana	1	stool	38	1	32.0502	1	0	0	93	2980	1820	227	5120	10147	251	4.16464	19.8411
13512.2	USA	5	stool	55	1	36.3582	1	1	1	115	1546.65	1460.58	51.06	2000.23	5058.53	143	3.69452	13.3141
13512.3	Ghana	1	stool			29.7225	0	NA	NA	92	2930	1590	44.7	6440	11004.7	245	4.20245	20.6593
13512.3	Ghana	1	stool					NA	NA	NA	1340	588	196	3230	5354	282	3.60288	21.6587
13512.3	Ghana	1	stool	40	1			NA	0	NA	2360	1070	61	4490	7981	304	4.20458	24.0808
13512.3	Ghana	1	stool	46	1			NA	0	NA	2534.65	2165.74	141.09	4669.04	9510.53	236	4.02218	18.8845
13512.3	Ghana	1	stool	33	1	23.5237	0	0	0	88	4000	1780	58.5	5850	11688.5	213	3.81492	17.2148
13512.3	Ghana	1	stool	50	0	25.3524	0	0	0	85	1922.75	1634	45.73	5858.07	9460.55	228	4.30332	18.242
13512.3	Ghana	1	stool	33	1	19.076	0	0	0	100	1950	1550	128	5750	9378	246	4.30298	19.1555
13512.3	Ghana	1	stool	53	1	28.4248	0	0	0	104	2655.4	2252.53	114.33	4963.3	9985.56	250	3.72225	21.3242
13512.3	Ghana	1	stool	41	1	30.3761	1	0	0	89	2354.63	1951.64	74.81	5158.47	9539.55	321	4.45297	25.454
13512.3	Ghana	1	stool	56	1	20.7593	0	0	0	96	1511.97	1000.49	155.95	3011.61	5680.02	236	3.88389	20.3661
13512.2	USA	5	stool	49	1	57.1041	1	1	1	99	882.93	951.66	157.14	2105.11	4096.85	165	3.15027	15.8734
13512.3	Ghana	1	stool	39	0			NA	0	NA	1880	1450	381	3400	7111	298	4.39617	24.0472
13512.3	Ghana	1	stool	45	1	20.3794	0	0	0	98	3376.2	4440.74	28.86	5990.19	13836	209	3.56571	16.7868
13512.3	Ghana	1	stool	30	0	21.7686	0	0	0	94	903	475	44.6	2560	3982.6	134	3.54275	13.2878
13512.3	Ghana	1	stool	38	1	30.8924	1	0	0	90	4126.26	3126.14	81.35	6836.92	14170.7	240	3.89878	19.8645
13512.2	USA	5	stool	49	0	41.0311	1	0	0	91	1041.7	289.3	126.03	1242.24	2699.27	233	3.35226	18.995
13512.3	Ghana	1	stool	37	1	20.8388	0	0	0	101	1644.21	1437.96	40.35	5338.62	8461.13	311	3.98396	25.057
13512.3	Ghana	1	stool	54	0	19.7652	0	0	0	96	993.04	924.71	306.24	3422.96	5646.96	322	4.25215	26.1287
13512.3	Ghana	1	stool	43	0	23.0861	0	0	0	118	2180.92	2547.26	103.41	7272.3	12103.9	209	3.72553	18.5823
13512.3	Ghana	1	stool	33	1	23.9204	0	0	0	123	1489.75	1091.24	102.33	4317.74	7001.06	261	3.81416	21.1213
13512.3	Ghana	1	stool	53	1			NA	0	NA	585.23	298.78	198.08	3059.65	4141.74	399	4.72991	33.1798
13512.3	Ghana	1	stool	52	0	19.0258	0	0	0	106	3132.1	2671.05	148.6	6518.64	12470.4	248	3.54848	20.5467
13512.3	Ghana	1	stool	47	1	21.3022	0	0	0	101	547	373	94.1	1850	2864.1	299	4.00913	24.6756
13512.3	Ghana	1	stool	41	1			NA	0	NA	1532.34	1879.39	18.44	5659.9	9090.07	159	3.30705	15.0868
13512.3	Ghana	1	stool	39	0	24.8731	0	0	0	111	3640	1860	39.5	5550	11089.5	214	3.6624	18.4241
13512.3	Ghana	1	stool	38	1			NA	0	NA	475.96	505.31	143.29	2281.38	3405.94	327	4.40263	26.8536
13512.2	USA	5	stool	47	1			NA	0	NA	777.02	893.41	34.5	1567.22	3272.15	129	3.19421	12.7352
13512.2	USA	5	stool	44	0	37.5646	1	1	1	172	661.69	580.14	111.3	678.88	2032.01	146	2.73403	14.8001
13512.3	Ghana	1	stool	29	1	32.1589	1	1	0	126	2015.35	3549.51	134.91	6887.96	12587.7	296	4.14722	23.5269
13512.3	Ghana	1	stool	41	1	31.9112	1	0	0	104	1566.42	1533.55	336.72	3807.3	7244	237	3.79135	20.1728
13512.3	Ghana	1	stool	37	1	25.9816	0	0	0	114	1156.02	1805.81	185.47	5359.64	8506.94	364	4.57932	28.0023
13512.3	Ghana	1	stool	54	0	24.4051	0	0	0	98	1797.92	2268.39	64.5	4987.32	9118.13	282	3.96404	22.3049
13512.3	Ghana	1	stool	38	0	18.4082	0	0	0	93	2823.19	2298.79	113.16	6281.44	11516.6	302	4.52943	24.2337
13512.3	Ghana	1	stool	35	1	30.4635	1	0	0	108	3592.88	1768.37	104.48	5644.89	11110.6	125	2.54624	12.8568
13512.3	Ghana	1	stool	52	1	18.0829	0	0	0	93	3940	1700	26.5	5200	10866.5	238	3.37413	19.1349
13512.3	Ghana	1	stool	51	1	25.8478	0	0	0	114	1866.45	2373.24	114.95	5062.38	9417.02	256	3.89759	21.3616
13512.3	Ghana	1	stool	50	1	21.3439	0	0	0	98	2043.5	2636.69	75.37	4894.24	9649.8	267	4.00342	22.6744
13512.3	Ghana	1	stool	39	0	20.6179	0	NA	0	NA	2362.78	606.64	35.46	5278.57	8283.45	182	3.73066	16.5375
13512.3	Ghana	1	stool	45	0	20.3252	0	0	0	82	2940	1400	29.6	4890	9259.6	192	3.5627	17.077
13512.3	Ghana	1	stool	48	0	29.3629	0	0	0	100	1617.17	1993.05	218.46	5059.38	8888.05	170	3.43977	16.2323
13512.3	Ghana	1	stool	52	1	36.3416	1	1	1	189	1534.94	480.2	37.3	3425.97	5478.4	119	2.42335	12.5594
13512.3	Ghana	1	stool	52	1	28.88	0	0	0	94	790.8	692.54	116.48	3410.95	5010.78	348	4.45554	26.5094
13512.3	Ghana	1	stool	46	1	30.4882	1	0	0	94	2677.99	1579.37	58.16	5134.45	9449.97	186	3.4164	17.6793
13512.3	Ghana	1	stool	49	1	28.0141	0	0	0	104	2074.98	1979.39	106.98	6047.24	10208.6	190	3.63857	18.6884
13512.3	Ghana	1	stool	46	1			0	0	94	1729.77	2091.29	42.63	3993.46	7857.15	262	3.44516	22.2009
13512.3	Ghana	1	stool	45	1	31.4034	1	0	0	59	2272.77	1059.96	63.73	5188.49	8584.96	132	2.7891	13.5234
13512.3	Ghana	1	stool	32	1	24.9509	0	0	0	120	3580	1260	76	5770	10686	287	3.51947	23.4155
13512.3	Ghana	1	stool	53	1	23.0533	0	0	0	96	2690	2070	16.4	5020	9796.4	151	3.48953	14.596
13512.3	Ghana	1	stool	52	1	31.2457	1	0	0	109	213	1650	878	860	3601	160	3.46875	16.34
13512.3	Ghana	1	stool	50	1	29.1495	0	0	0	112	2040	786	69.3	3890	6785.3	299	4.20067	24.7565
13512.3	Ghana	1	stool	43	1	28.1946	0	0	0	99	4730	2910	50.6	7740	15430.6	225	3.99506	19.6864
13512.3	Ghana	1	stool	34	1	21.0158	0	0	0	115	1450	735	49.2	3310	5544.2	265	3.74948	22.9698
13512.3	Ghana	1	stool	48	0	21.07	0	0	0	92	1349	844.97	236.33	4164.61	6594.91	253	3.26267	22.826
13512.3	Ghana	1	stool	52	1	22.8553	0	0	0	98	806.73	1468.79	82.88	3627.14	5985.54	195	3.56896	16.6765
13512.3	Ghana	1	stool	54	0	24.37	0	0	0	102	2095.35	1603.6	173.88	4335.75	8208.59	239	4.15834	20.015
13512.3	Ghana	1	stool	45	1	30.3005	1	0	0	103	2617.99	1523.42	23.48	5101.42	9266.31	180	2.95533	16.3619
13512.3	Ghana	1	stool	50	1	26.2091	0	0	0	105	1822.74	1761.76	231.32	5188.49	9004.32	261	3.98366	21.2431
13512.3	Ghana	1	stool	43	1	22.9767	0	NA	0	NA	2840	1100	78.1	4070	8088.1	264	3.38108	21.1775
13512.3	Ghana	1	stool	45	1	23.6328	0	1	0	136	1430.48	1347.2	24.14	4206.64	7008.47	170	2.85562	15.5152
13512.3	Ghana	1	stool	52	1	25.6787	0	1	0	267	3929.94	3720	38.02	6404.55	14092.5	201	3.27128	19.1826
13512.3	Ghana	1	stool	48	0	22.8858	0	0	0	86	1493.45	1219.88	233.16	4359.78	7306.27	284	4.19631	24.2732
13512.3	Ghana	1	stool	49	0	20.9698	0	0	0	103	1600.5	2023.45	333.76	4846.2	8803.9	254	4.24918	22.0116
13512.5	Seychelles	4	stool	44	0	20.2801	0	0	0	98	1980	1090	203	3830	7103	172	3.9561	15.561
13512.5	Seychelles	4	stool	46	1	30.9343	1	0	0	111	1390	699	69.5	4840	6998.5	140	3.47083	14.7112
13512.5	Seychelles	4	stool	47	1	30.1568	1	0	0	119	1410	395	177	5970	7952	97	1.24645	12.6734
13512.5	Seychelles	4	stool	45	1	37.2428	1	0	0	105	1120	309	89.6	2160	3678.6	182	3.48335	17.957
13512.3	Ghana	1	stool	45	0	20.791	0	0	0	113	1060	418	75.1	3180	4733.1	359	3.96966	27.7888
13512.5	Seychelles	4	stool	53	0	29.5476	0	1	1	129	1040	771	208	2770	4789	183	3.60293	18.2991
13512.5	Seychelles	4	stool	46	1	31.1148	1	0	0	96	1870	840	24.9	4240	6974.9	176	4.1379	17.026
13512.5	Seychelles	4	stool	43	1	39.3658	1	1	0	138	796	255	105	2070	3226	271	4.23157	24.4727
13512.5	Seychelles	4	stool	44	1	30.4136	1	1	0	178	NA	NA	NA	NA	NA	89	2.89053	10.597
13512.5	Seychelles	4	stool	40	1	21.5269	0	0	0	104	320	88.6	58.6	970	1437.2	273	4.19696	24.3379
13512.5	Seychelles	4	stool	40	1	33.1032	1	0	0	85	12.4	107	162	44.5	325.9	171	2.44447	17.4645
13512.3	Ghana	1	stool	53	1	19.1715	0	0	0	86	2110	595	135	4870	7710	319	4.4266	26.8833
13512.5	Seychelles	4	stool	42	0			NA	0	NA	4480	382	16.6	3840	8718.6	112	3.02407	11.7587
13512.5	Seychelles	4	stool	40	1	31.1697	1	0	0	121	798	431	61.4	8590	9880.4	62	1.31913	8.87462
13512.3	Ghana	1	stool	53	1	32.1746	1	0	0	104	2960	1240	110	4630	8940	293	4.04585	22.9398
13512.5	Seychelles	4	stool	42	0	38.3921	1	0	0	104	3260	948	36.2	3590	7834.2	175	3.39383	16.5516
13512.5	Seychelles	4	stool	42	1	25.1454	0	0	0	92	846	462	122	3110	4540	169	2.9965	17.9071
13512.5	Seychelles	4	stool	42	1	22.0937	0	0	0	104	1390	861	17.1	6600	8868.1	70	1.92361	8.97175
13512.5	Seychelles	4	stool	40	0	26.2828	0	0	0	117	2440	1250	38	4540	8268	123	3.04117	12.9589
13512.5	Seychelles	4	stool	41	0			1	0	294	1280	226	6.07	2490	4002.07	149	3.30557	13.0995
13512.5	Seychelles	4	stool	40	1	28.2471	0	0	0	121	945	646	292	2860	4743	145	3.29554	15.8035
13512.5	Seychelles	4	stool	39	1	37.3235	1	0	0	116	1480	681	55.5	2840	5056.5	191	3.4624	16.9907
13512.5	Seychelles	4	stool	40	1	27.4701	0	1	0	131	1020	500	135	2240	3895	160	3.49022	16.2376
13512.5	Seychelles	4	stool	41	1	33.5012	1	0	0	89	1020	772	414	2540	4746	275	3.70488	27.0892
13512.5	Seychelles	4	stool	39	0	27.5135	0	1	0	138	1020	438	147	2710	4315	68	2.69019	7.85346
13512.5	Seychelles	4	stool	40	0	20.0805	0	1	0	332	1700	620	65.3	5170	7555.3	112	3.41589	12.0937
13512.5	Seychelles	4	stool	42	0	26.3753	0	1	0	347	895	812	76.9	4940	6723.9	134	2.52269	13.9614
13512.5	Seychelles	4	stool	51	1	23.6337	0	0	0	101	1040	372	42.4	5300	6754.4	119	2.36066	13.1073
13512.5	Seychelles	4	stool	41	1	22.6939	0	0	0	113	493	251	214	2090	3048	216	4.02506	19.9726
13512.5	Seychelles	4	stool	42	1	28.6678	0	0	0	111	24.1	400	162	561	1147.1	125	2.81391	13.4217
13512.5	Seychelles	4	stool	52	1	24.2389	0	0	0	107	23	74.8	164	61.6	323.4	100	1.57818	12.6999
13512.5	Seychelles	4	stool	51	0	37.1918	1	1	0	144	1260	1060	111	5930	8361	117	2.53932	13.561
13512.5	Seychelles	4	stool	52	0	32.7854	1	0	0	105	1340	676	21.4	2970	5007.4	220	3.64181	20.0012
13512.5	Seychelles	4	stool	50	1	37.7748	1	0	0	99	2890	1020	45.1	6830	10785.1	125	2.86094	13.0092
13512.5	Seychelles	4	stool	50	1	46.4842	1	0	0	111	845	656	83.6	4690	6274.6	122	2.94348	12.462
13512.5	Seychelles	4	stool	53	1	31.8754	1	0	0	114	1060	647	137	4330	6174	111	2.88725	12.8784
13512.5	Seychelles	4	stool	48	1	26.4292	0	0	0	101	4700	177	8.06	4030	8915.06	92	2.26741	9.86282
13512.5	Seychelles	4	stool	38	1	28.7846	0	0	0	98	351	255	31	719	1356	79	1.07681	9.49802
13512.3	Ghana	1	stool	40	0	19.5274	0	0	0	112	989.71	1324.73	241.69	3311.87	5868	226	3.81945	19.6082
13512.4	Ghana	1	stool	31	0	20.9771	0	0	0	96	1730.51	1781.58	113.62	3597.11	7222.83	228	3.50055	20.0463
13512.5	Seychelles	4	stool	52	0	25.2675	0	1	0	133	1050	646	125	4150	5971	95	1.54357	11.2228
13512.5	Seychelles	4	stool	40	1	21.8771	0	0	0	93	1420	878	59.6	5060	7417.6	132	2.77803	13.4711
13512.5	Seychelles	4	stool	52	1	34.8696	1	1	0	146	1220	328	92.8	1840	3480.8	176	3.67353	15.422
13512.5	Seychelles	4	stool	36	1	34.9866	1	1	1	329	3660	883	34.8	4360	8937.8	93	2.81135	10.5464
13512.5	Seychelles	4	stool	37	1	33.8664	1	0	0	102	1430	746	258	4490	6924	106	2.66782	11.6462
13512.3	Ghana	1	stool	38	0	20.5715	0	0	0	98	3082.47	2015.08	78.03	4969.3	10144.9	146	3.1873	14.0019
13512.5	Seychelles	4	stool	34	1	51.0979	1	0	0	94	645	527	172	166	1510	123	2.82718	14.2625
13512.3	Ghana	1	stool	42	0	33.7142	1	0	0	96	3089.88	2801.46	58.57	5359.64	11309.5	142	2.93309	14.5681
13512.5	Seychelles	4	stool	37	1	39.6327	1	0	0	103	3400	818	61	4780	9059	157	3.7623	15.2204
13512.5	Seychelles	4	stool	34	1	32.1796	1	0	0	114	3190	778	59.8	4000	8027.8	114	2.83652	12.3982
13512.4	Ghana	1	stool	36	1	27.8282	0	0	0	110	1498.64	1553.38	288.21	4587.97	7928.2	425	4.67369	31.8779
13512.4	Ghana	1	stool	36	1	30.8499	1	NA	0	NA	181.68	741.01	43.17	897.78	1863.63	89	2.87089	10.8379
13512.4	Ghana	1	stool	40	1	32.9913	1	0	0	103	1854.22	1621.66	104.12	3471.01	7051.01	252	3.73772	21.8294
13512.4	Ghana	1	stool	25	0			NA	0	NA	495.22	840.13	46.73	1276.41	2658.49	324	4.17049	24.6158
13512.4	Ghana	1	stool	28	0			NA	0	NA	775.25	655.1	154.06	2234.84	3819.24	239	4.18258	19.9553
13512.5	Seychelles	4	stool	37	1	26.9996	0	1	1	130	646	318	97	1690	2751	120	2.76705	12.9827
13512.4	Ghana	1	stool	44	1			NA	0	NA	2354.26	1942.83	80.43	3825.31	8202.83	287	3.68202	23.262
13512.5	Seychelles	4	stool	33	1	21.5264	0	0	0	102	2310	1190	24.8	5930	9454.8	98	2.5453	11.092
13512.5	Seychelles	4	stool	34	1	22.0934	0	0	0	98	979	357	103	3830	5269	103	2.23438	11.3762
13512.4	Ghana	1	stool	26	1	30.2819	1	0	0	102	998.97	1030.89	230.81	2927.54	5188.2	296	4.11393	25.2872
13512.4	Ghana	1	stool	28	1	27.6904	0	0	0	87	1514.2	1608.01	83.08	3744.24	6949.53	263	3.60031	22.4877
13512.4	Ghana	1	stool	39	1	38.5992	1	1	1	154	1324.18	952.03	83.08	2554.31	4913.6	242	3.68733	21.5688
13512.4	Ghana	1	stool	37	0	21.992	0	0	0	97	1632.35	1650.3	14.15	3095.68	6392.48	115	2.95475	12.7382
13512.4	Ghana	1	stool	27	1	28.6785	0	0	0	97	2509.46	2432.72	104.94	3870.35	8917.47	280	3.32363	24.0534
13512.4	Ghana	1	stool	44	0	22.4923	0	0	0	114	1936.08	1980.27	118.11	5086.4	9120.87	185	3.53331	17.9209
13512.4	Ghana	1	stool	30	0	19.7756	0	0	0	101	1716.06	2452.1	115.71	5783.01	10066.9	282	4.38832	23.6585
13512.4	Ghana	1	stool	28	1			0	0	97	1563.83	2477.21	425.12	2950.96	7417.11	216	3.76485	18.6607
13512.3	Ghana	1	stool	43	1	27.1369	0	0	0	97	4010	1370	51.1	4730	10161.1	257	3.43016	20.9191
13512.4	Ghana	1	stool	23	0			NA	0	NA	1119.35	1503.6	65.11	4314.74	7002.79	188	3.39495	15.9854
13512.4	Ghana	1	stool	28	0	19.8156	0	0	0	99	2032.76	2270.15	77.67	4101.55	8482.13	267	3.75865	21.3289
13512.4	Ghana	1	stool	24	1			NA	0	NA	1844.59	3027.02	276.98	4590.98	9739.56	199	3.49043	17.8173
13512.4	Ghana	1	stool	47	0	25.3614	0	0	0	107	NA	NA	NA	NA	NA	171	3.13782	16.1742
13512.4	Ghana	1	stool	40	1			NA	0	NA	1665.32	1781.58	240.52	4170.61	7858.03	282	4.18134	23.965
13512.4	Ghana	1	stool	30	0	20.0645	0	0	0	104	1686.8	1293.9	113.93	4870.22	7964.84	309	4.18943	23.274
13512.4	Ghana	1	stool	37	1	18.6779	0	0	0	100	1001.93	1080.23	268.4	2150.46	4501.02	398	4.19503	30.592
13512.4	Ghana	1	stool	30	0	22.4822	0	0	0	95	512.26	867.44	198.59	1989.52	3567.82	270	4.12356	21.5936
13512.3	Ghana	1	stool	47	0	21.7625	0	0	0	112	2500	1220	133	5750	9603	362	4.43443	28.8196
13512.4	Ghana	1	stool	46	1	18.1028	0	0	0	85	1998.68	2414.21	241.28	3558.08	8212.26	339	4.41481	26.518
13512.4	Ghana	1	stool	40	1	23.1162	0	0	0	112	811.92	996.52	100.04	4143.59	6052.07	347	4.59911	27.6237
13512.5	Seychelles	4	stool	34	1	21.4996	0	0	0	89	767	317	147	4490	5721	107	2.36856	12.8514
13512.5	Seychelles	4	stool	38	0	22.4776	0	0	0	92	775	675	171	2490	4111	109	2.54761	11.6235
13512.5	Seychelles	4	stool	34	1	21.2295	0	0	0	107	1410	1110	51.3	5960	8531.3	107	2.58378	11.2962
13512.5	Seychelles	4	stool	36	1	34.009	1	0	0	104	649	187	59.2	3930	4825.2	78	2.18629	8.95735
13512.5	Seychelles	4	stool	36	1	35.0073	1	1	0	135	1120	414	60.8	4620	6214.8	179	3.43001	17.6228
13512.5	Seychelles	4	stool	36	0	28.0711	0	0	0	118	2970	442	53.4	3780	7245.4	117	3.18994	11.1235
13512.5	Seychelles	4	stool	37	1	24.0506	0	0	0	96	1280	446	97.4	3670	5493.4	150	3.43057	14.1806
13512.5	Seychelles	4	stool	33	1	29.2822	0	0	0	95	1670	483	150	7340	9643	86	3.79403	9.9616
13512.4	Ghana	1	stool	40	1	31.7596	1	0	0	125	1490.12	1875.86	379.11	4825.18	8570.27	289	3.80477	22.3944
13512.4	Ghana	1	stool	48	0	29.9631	0	0	0	88	2048.31	1847.67	139.36	4170.61	8205.95	166	3.02983	16.1811
13512.4	Ghana	1	stool	47	1	28.4275	0	0	0	101	1833.11	2741.54	46.21	5500.76	10121.6	245	4.30513	20.9342
13512.4	Ghana	1	stool	23	0			NA	0	NA	1411.96	2011.99	128.12	4702.07	8254.15	307	4.53322	23.4576
13512.5	Seychelles	4	stool	38	1	43.0677	1	0	0	101	2290	1340	324	5830	9784	98	2.2107	11.745
13512.4	Ghana	1	stool	38	1	25.155	0	0	0	107	3881.79	2782.51	31.71	5410.69	12106.7	183	3.37803	18.0539
13512.5	Seychelles	4	stool	38	1	41.4488	1	0	0	98	1020	463	139	2160	3782	211	3.79395	18.4766
13512.4	Ghana	1	stool	41	0	22.8645	0	0	0	90	1496.42	1196.53	317.78	3732.23	6742.96	237	3.95722	20.1877
13512.4	Ghana	1	stool	37	0	22.8252	0	0	0	113	1924.23	1770.57	250.47	4068.52	8013.8	296	4.34959	24.445
13512.4	Ghana	1	stool	48	1	27.6948	0	0	0	96	1350.85	1300.06	109.43	3038.63	5798.98	190	2.89797	16.6759
13512.4	Ghana	1	stool			29.3755	0	NA	NA	97	1286.03	2495.72	138.54	4059.52	7979.8	141	3.2875	13.9888
13512.5	Seychelles	4	stool	35	0	28.6825	0	NA	0	NA	1210	521	167	2130	4028	161	2.28794	15.4113
13512.4	Ghana	1	stool	28	1	31.0921	1	0	0	106	1203.43	3597.97	49.62	6134.31	10985.3	243	3.63006	19.895
13512.5	Seychelles	4	stool	35	1	31.7778	1	0	0	99	1730	1070	76.4	3840	6716.4	125	3.3482	12.5323
13512.4	Ghana	1	stool	32	0	20.8185	0	0	0	87	1236.4	5828.48	59.59	6425.56	13550	203	3.69173	17.2192
13512.5	Seychelles	4	stool	37	1	28.7403	0	0	0	99	978	317	192	1180	2667	224	3.94174	19.1981
13512.5	Seychelles	4	stool	49	1	25.7091	0	0	0	95	1540	1550	111	3260	6461	146	3.28303	14.5682
13512.5	Seychelles	4	stool	49	1	22.037	0	0	0	98	1040	683	35.4	5230	6988.4	83	2.07895	9.80236
13512.5	Seychelles	4	stool	47	0	26.7709	0	0	0	96	104	1.81	29.4	973	1108.21	64	1.41827	8.99798
13512.5	Seychelles	4	stool	51	1	34.5222	1	0	0	117	714	482	43.7	2420	3659.7	150	3.17576	14.4479
13512.5	Seychelles	4	stool	43	1	28.7313	0	0	0	116	876	516	280	2140	3812	219	3.70749	19.8587
13512.5	Seychelles	4	stool	52	0	29.2445	0	0	0	123	608	493	229	2260	3590	186	3.51433	17.0118
13512.5	Seychelles	4	stool	43	1	27.1208	0	0	0	111	404	231	59.3	1030	1724.3	197	3.65346	18.089
13512.4	Ghana	1	stool	42	1	27.846	0	0	0	95	1548.64	1273.19	303.43	3702.21	6827.47	374	4.23393	29.7868
13512.4	Ghana	1	stool	33	1	26.341	0	0	0	104	1627.17	1775.42	64.85	4191.63	7659.07	236	3.84103	19.7573
13512.4	Ghana	1	stool	35	1	35.3182	1	0	0	122	2903.57	2321.7	111.73	4482.88	9819.88	189	3.66349	17.3212
13512.5	Seychelles	4	stool	47	0	30.8997	1	0	0	106	1410	952	35.7	3980	6377.7	95	3.14078	11.0461
13512.4	Ghana	1	stool	45	1	18.4879	0	0	0	94	3206.92	2495.72	132.41	4176.62	10011.7	153	3.61306	14.4603
13512.5	Seychelles	4	stool	44	1	28.6161	0	0	0	105	875	423	114	4780	6192	153	2.34169	15.9676
13512.5	Seychelles	4	stool	44	1	19.8141	0	0	0	100	1000	597	148	4800	6545	125	2.90938	14.5198
13512.4	Ghana	1	stool	46	1	27.1816	0	1	0	144	1822.74	2440.21	122.25	3600.12	7985.31	149	3.26815	14.9181
13512.4	Ghana	1	stool	30	1	28.4942	0	0	0	101	1781.25	1409.32	126.59	2799.32	6116.49	159	2.60856	15.4943
13512.4	Ghana	1	stool	39	1	37.3328	1	0	0	112	1967.94	1128.25	198.34	3912.39	7206.91	231	4.14872	19.0283
13512.5	Seychelles	4	stool	51	1	39.0358	1	0	0	110	1010	642	29.7	3500	5181.7	115	2.62388	12.4986
13512.4	Ghana	1	stool	34	1	25.1472	0	0	0	122	683.76	793.43	212.23	2199.1	3888.52	266	4.1503	21.6718
13512.5	Seychelles	4	stool	43	0	24.2023	0	0	0	113	1690	475	60.8	6830	9055.8	108	2.48212	13.227
13512.5	Seychelles	4	stool	47	1	34.7075	1	0	0	105	1110	884	16.5	3550	5560.5	107	2.99089	10.1497
13512.4	Ghana	1	stool	35	1	35.1438	1	1	0	185	1116.76	1067.01	132.36	2899.01	5215.14	322	4.33968	24.4838
13512.4	Ghana	1	stool	40	1	59.2637	1	1	0	144	1329	1387.29	163.31	3927.4	6806.99	264	4.08904	22.0072
13512.4	Ghana	1	stool	40	1	24.6931	0	0	0	119	2184.62	2164.42	58.06	4648.02	9055.13	154	3.45542	15.2735
13512.4	Ghana	1	stool	39	1	26.5752	0	0	0	85	847.85	711.05	173.01	2467.54	4199.44	219	3.36436	20.3259
13512.5	Seychelles	4	stool	49	0	22.4088	0	1	0	133	3790	1050	40	4480	9360	146	3.18687	14.8025
13512.4	Jamaica	3	stool	52	0	28.7996	0	0	0	97	441.56	537.5	156.18	681.73	1816.95	133	2.89169	12.4811
13512.3	Ghana	1	stool	33	1	29.8971	0	0	0	110	1970	1200	232	3060	6462	259	3.52158	20.4506
13512.3	Ghana	1	stool	52	0	20.5704	0	0	0	105	3790	884	209	4050	8933	244	4.09106	20.4844
13512.5	Seychelles	4	stool	46	1	20.9366	0	0	0	106	2250	210	216	1050	3726	102	1.22362	14.5689
13512.3	Ghana	1	stool	45	0	25.8426	0	0	0	79	2510	1420	35.7	4980	8945.7	244	3.37626	20.1224
13512.5	Seychelles	4	stool	41	1	33.9979	1	1	0	135	1530	466	109	3420	5525	136	2.84967	14.4324
13512.4	Jamaica	3	stool	53	1	23.4898	0	0	0	113	1722.24	1339.67	15.96	2334.35	5412.22	85	2.23529	9.6755
13512.5	Seychelles	4	stool	53	1	30.1928	1	1	0	132	573	312	177	1840	2902	198	3.08604	19.6399
13512.5	Seychelles	4	stool	46	1	33.8363	1	0	0	113	567	240	104	2950	3861	99	1.50041	11.987
13512.5	Seychelles	4	stool	50	1	31.2323	1	0	0	112	1290	266	296	3670	5522	96	2.99194	10.8624
13512.5	Seychelles	4	stool	48	1	33.677	1	0	0	109	866	792	76.2	2360	4094.2	140	2.40037	14.7731
13512.4	Ghana	1	stool	22	1	27.8214	0	NA	0	NA	1108.24	1407.12	123.37	3311.87	5950.59	205	2.76792	18.9141
13512.3	Ghana	1	stool	52	0	21.6029	0	0	0	103	3420	1790	72.5	4950	10232.5	239	3.43165	20.1437
13512.4	Ghana	1	stool	34	0	24.7834	0	0	0	97	1227.51	901.81	187.1	3386.93	5703.35	225	3.53031	20.6943
13512.4	Jamaica	3	stool	42	0	25.8971	0	0	0	103	1176.81	762.83	68.39	1706.56	3714.59	154	2.0346	15.8908
13512.5	Seychelles	4	stool	33	1	38.6857	1	0	0	108	1310	552	225	2410	4497	245	4.03597	21.1207
13512.5	Seychelles	4	stool	48	1	19.5346	0	0	0	91	1570	928	57.8	5570	8125.8	105	3.0469	10.5219
13512.4	Jamaica	3	stool					NA	NA	NA	NA	NA	NA	NA	NA	147	3.38665	13.4972
13512.5	Seychelles	4	stool	46	1	28.2915	0	0	0	114	1450	660	115	2950	5175	134	3.30933	14.6884
13512.5	Seychelles	4	stool	50	1	16.7769	0	0	0	105	925	792	27	4250	5994	109	2.71956	11.7486
13512.4	Jamaica	3	stool	32	1	29.9252	0	0	0	96	644.13	1038.28	15.22	885.49	2583.13	87	2.46059	10.2176
13512.4	Jamaica	3	stool	50	1	39.3194	1	0	0	96	736.18	682.37	195.57	919.51	2533.62	102	2.6036	11.5559
13512.4	Jamaica	3	stool	45	1	27.4656	0	0	0	118	993.64	753.59	13.32	1450.8	3211.36	84	2.27131	9.03058
13512.5	Seychelles	4	stool	39	0	20.7889	0	0	0	109	1830	630	39.9	4510	7009.9	94	2.38898	11.3684
13512.5	Seychelles	4	stool	49	1	24.0588	0	0	0	121	778	248	175	3260	4461	168	3.6401	17.0612
13512.5	Seychelles	4	stool	53	1	34.8097	1	0	0	97	1460	488	88.8	4790	6826.8	100	2.37734	12.1773
13512.5	Seychelles	4	stool	49	1	46.1825	1	1	0	134	1160	599	61.6	3980	5800.6	98	2.64826	10.2026
13512.5	Seychelles	4	stool	47	1	30.9749	1	1	0	129	280	585	2.17	3900	4767.17	108	2.87101	10.9832
13512.5	Seychelles	4	stool	51	1	36.462	1	0	0	102	1570	393	111	1930	4004	267	4.21248	22.5862
13512.5	Seychelles	4	stool	39	0			0	0	117	1610	543	80	2720	4953	151	3.4458	15.686
13512.5	Seychelles	4	stool	40	0	31.0906	1	0	0	114	979	537	79.9	2260	3855.9	166	3.53299	14.3534
13512.5	Seychelles	4	stool	39	1	32.3761	1	0	0	106	456	262	173	2380	3271	193	3.04841	19.5254
13512.5	Seychelles	4	stool	51	1	50.1098	1	0	0	105	1610	459	57.3	2640	4766.3	72	1.50003	8.07252
13512.5	Seychelles	4	stool	42	1	31.8555	1	0	0	115	1040	580	110	3410	5140	141	2.14508	14.2615
13512.5	Seychelles	4	stool	47	0	23.996	0	0	0	117	3170	766	76.3	4270	8282.3	148	3.24599	13.5319
13512.5	Seychelles	4	stool	43	0	28.6041	0	1	0	141	1400	230	1.89	2410	4041.89	82	2.109	9.19835
13512.5	Seychelles	4	stool	42	1	28.4079	0	0	0	92	524	153	70.9	1180	1927.9	137	3.48227	13.0774
13512.5	Seychelles	4	stool	49	1	31.2489	1	0	0	106	894	415	34.8	2630	3973.8	162	3.62675	14.587
13512.5	Seychelles	4	stool	47	1	30.7852	1	0	0	102	40.4	132	170	84.6	427	108	2.11879	11.7452
13512.5	Seychelles	4	stool	50	1	25.7098	0	0	0	120	1360	771	104	4090	6325	109	2.49865	12.549
13512.5	Seychelles	4	stool	47	0	26.1286	0	0	0	91	867	555	2.28	2610	4034.28	115	3.21479	12.1571
13512.5	Seychelles	4	stool	33	1	22.6985	0	0	0	93	1220	549	212	3850	5831	179	3.44185	18.0272
13512.3	Ghana	1	stool	50	1	37.8545	1	0	0	98	2430	1090	164	4550	8234	314	4.30494	25.9716
13512.3	Ghana	1	stool	50	1	26.4984	0	0	0	97	1670	818	120	4520	7128	353	4.20397	27.7645
13512.3	Ghana	1	stool	54	1	32.8442	1	NA	0	NA	3830	1270	5.22	5070	10175.2	173	3.4828	16.0849
13512.5	Seychelles	4	stool	42	1	23.4632	0	0	0	113	1350	405	240	3700	5695	125	2.86847	12.9319
13512.3	Ghana	1	stool	45	1	30.1843	1	NA	0	NA	1470	931	154	3230	5785	274	3.71604	22.7486
13512.5	Seychelles	4	stool	49	1	27.2062	0	0	0	104	442	156	45.1	1040	1683.1	140	2.89186	13.9462
13512.3	Ghana	1	stool	35	0	20.7762	0	0	0	86	2690	1950	37.5	4670	9347.5	174	3.69632	15.1485
13512.3	Ghana	1	stool	38	1	29.8314	0	0	0	82	1930	1300	7.39	3250	6487.39	121	2.83354	11.1444
13512.5	Seychelles	4	stool	42	1	30.8463	1	0	0	94	876	288	161	4700	6025	120	2.58803	13.3796
13512.5	Seychelles	4	stool	39	0	31.3364	1	1	0	130	1330	336	35.2	2040	3741.2	172	3.81209	17.1123
13512.3	Ghana	1	stool	58	1	27.6993	0	0	0	99	5090	1120	133	5160	11503	153	3.20877	13.4907
13512.5	Seychelles	4	stool	41	0	23.8367	0	0	0	98	2100	781	67.1	3770	6718.1	147	3.6981	14.2976
13512.3	Ghana	1	stool	50	1	29.1578	0	0	0	105	3640	858	17.1	4050	8565.1	157	3.54669	14.0378
13512.5	Seychelles	4	stool	46	0	28.0686	0	0	0	124	3920	926	27.1	4690	9563.1	172	3.7067	15.7681
13512.3	Ghana	1	stool	33	0	17.8842	0	0	0	105	1710	563	83.2	2920	5276.2	215	4.0976	18.3277
13512.5	Seychelles	4	stool	46	1	28.9617	0	0	0	98	152	40.1	46.6	530	768.7	268	3.67116	24.2194
13512.5	Seychelles	4	stool	49	0	24.2607	0	0	0	115	711	381	36.5	2150	3278.5	172	3.61988	17.078
13512.3	Ghana	1	stool	53	1	28.4374	0	NA	0	NA	4660	1600	49.6	7000	13309.6	281	4.26178	22.4563
13512.5	Seychelles	4	stool	44	1	36.2509	1	0	0	96	1210	397	95.7	2400	4102.7	188	3.57344	17.2211
13512.3	Ghana	1	stool	54	1	24.4947	0	0	0	98	1480	581	188	3050	5299	389	4.65511	29.5743
13512.5	Seychelles	4	stool	41	1	22.865	0	0	0	95	584	304	144	1690	2722	262	3.85663	24.8779
13512.3	Ghana	1	stool	51	1	34.3184	1	NA	0	NA	1240	585	159	2960	4944	327	4.54837	27.8233
13512.3	Ghana	1	stool	59	0	20.9368	0	0	0	92	1890	2070	14.8	4920	8894.8	155	3.69103	14.0696
13512.5	Seychelles	4	stool	42	0	29.367	0	0	0	120	1970	600	105	2410	5085	147	3.37502	14.4923
13512.3	Ghana	1	stool	50	0	19.8129	0	0	0	93	1360	746	172	3950	6228	321	4.68646	23.8853
13512.5	Seychelles	4	stool	38	1	31.0459	1	0	0	101	733	282	135	1540	2690	193	3.54953	17.4841
13512.3	Ghana	1	stool	39	1	36.7122	1	0	0	95	788	716	4.72	1950	3458.72	132	3.37624	12.5268
13512.5	Seychelles	4	stool	47	1	29.3199	0	0	0	99	1740	522	52.8	2790	5104.8	115	2.57126	13.9395
13512.3	Ghana	1	stool	41	1	28.5142	0	NA	0	NA	3450	1140	77.1	5130	9797.1	238	3.81564	19.7612
13512.5	Seychelles	4	stool	40	0	31.1798	1	0	0	105	1690	517	105	2500	4812	150	3.71068	13.3013
13512.3	Ghana	1	stool	52	0			NA	0	NA	2250	1690	80	4680	8700	206	3.9413	17.6765
13512.3	Ghana	1	stool	41	0	25.3839	0	0	0	90	4030	1830	372	7780	14012	179	3.59225	16.2297
13512.3	Ghana	1	stool	42	0	19.8718	0	0	0	94	1740	1040	52.5	3560	6392.5	294	4.57291	21.8733
13512.5	Seychelles	4	stool	43	1	39.1564	1	1	1	154	858	442	116	1520	2936	173	3.6621	16.5196
13512.5	Seychelles	4	stool	36	0			0	0	103	965	429	94.4	2010	3498.4	162	3.00945	15.8136
13512.5	Seychelles	4	stool	33	0	29.5098	0	0	0	113	1870	243	30.4	3270	5413.4	101	2.98635	10.5489
13512.5	Seychelles	4	stool	36	1	29.5478	0	0	0	108	604	291	190	1360	2445	194	2.85997	18.4957
13512.5	Seychelles	4	stool	51	1	19.9023	0	0	0	97	461	393	76.3	1680	2610.3	229	3.94964	19.6407
13512.5	Seychelles	4	stool	52	1	47.6886	1	0	0	125	1730	736	43.7	3500	6009.7	103	3.11002	11.4356
13512.3	Ghana	1	stool	40	1			NA	0	NA	2840	1240	58.1	3910	8048.1	255	3.42328	22.601
13512.3	Ghana	1	stool	46	0	29.2262	0	0	0	106	3690	1230	27	5430	10377	161	3.78639	14.9511
13512.3	Ghana	1	stool	57	0	27.4516	0	NA	0	NA	3710	999	3	5250	9962	236	3.39194	19.057
13512.3	Ghana	1	stool	38	0	23.4971	0	0	0	99	1900	1100	134	4480	7614	212	3.78632	18.5871
13512.3	Ghana	1	stool	49	0	19.9854	0	0	0	109	3140	1050	77.3	5160	9427.3	200	3.78412	16.3396
13512.3	Ghana	1	stool	49	0	15.4873	0	0	0	95	2510	666	21.6	4900	8097.6	159	2.74067	15.1076
13512.3	Ghana	1	stool	53	1	24.5826	0	0	0	89	1650	852	247	3590	6339	237	3.99027	21.6592
13512.3	Ghana	1	stool	35	1			NA	0	NA	2070	1270	37.7	5370	8747.7	270	4.23209	22.4092
13512.3	Ghana	1	stool	42	0	19.9573	0	0	0	98	1140	486	61.4	2930	4617.4	307	4.29438	24.6332
13512.5	Seychelles	4	stool	48	0	21.7181	0	0	0	108	898	188	33.2	1630	2749.2	96	2.65003	10.9329
13512.5	Seychelles	4	stool	50	0	28.2697	0	1	0	163	1590	352	62	2730	4734	148	3.21588	14.5468
13512.5	Seychelles	4	stool	49	0	20.7373	0	0	0	101	1760	646	102	3460	5968	168	3.31723	16.3616
13512.5	Seychelles	4	stool	51	0	25.8592	0	0	0	115	499	224	105	1440	2268	280	4.05438	24.7552
13512.4	Ghana	1	stool	50	1	30.2276	1	0	0	102	862.66	596.95	217.59	2634.18	4311.38	234	3.30176	19.3277
13512.5	Seychelles	4	stool	49	0	22.6914	0	0	0	111	987	434	114	1980	3515	223	4.22537	18.962
13512.5	Seychelles	4	stool	49	0	26.0933	0	0	0	118	834	487	96.2	2440	3857.2	140	3.57173	13.7976
13512.5	Seychelles	4	stool	52	0	35.0544	1	1	0	126	3510	1640	129	7970	13249	191	3.87526	16.599
13512.5	Seychelles	4	stool	45	0	29.3334	0	1	0	381	1550	809	38.8	2880	5277.8	165	3.55522	16.0019
13512.4	Ghana	1	stool	26	0	25.5424	0	0	0	82	2270.55	2223.46	210.23	3984.45	8688.69	239	3.70978	20.8472
13512.5	Seychelles	4	stool	48	0			0	0	113	1800	701	82.5	3530	6113.5	237	4.18979	20.2369
13512.5	Seychelles	4	stool	43	1	28.6098	0	0	0	100	372	158	97.8	1380	2007.8	172	3.4879	17.5675
13512.5	Seychelles	4	stool	44	0	27.8702	0	1	0	140	2690	823	86.3	4010	7609.3	160	3.45577	14.1553
13512.5	Seychelles	4	stool	44	0	25.928	0	0	0	104	1170	997	19.8	3290	5476.8	128	2.71502	12.9751
13512.5	Seychelles	4	stool	52	0			0	0	100	4330	1030	45.1	5400	10805.1	119	3.47998	12.4248
13512.5	Seychelles	4	stool	41	1	31.3815	1	0	0	114	2000	1240	320	4440	8000	219	3.94949	18.8463
13512.5	Seychelles	4	stool	45	1			0	0	100	541	118	100	1150	1909	189	3.62707	17.8639
13512.3	Ghana	1	stool	45	0	32.8724	1	0	0	97	2220	1420	43.3	3880	7563.3	153	3.2862	14.1001
13512.5	Seychelles	4	stool	33	1	29.1555	0	0	0	118	1090	335	116	2220	3761	191	3.69086	17.6163
13512.5	Seychelles	4	stool	51	0			0	0	100	1960	688	170	2480	5298	130	3.36971	12.8742
13512.3	Ghana	1	stool	36	0	24.1397	0	0	0	111	1560	525	132	2430	4647	160	2.64489	15.1198
13512.5	Seychelles	4	stool	39	1	27.1836	0	0	0	99	1460	605	108	2610	4783	227	3.87366	18.9467
13512.5	Seychelles	4	stool	49	0	37.2536	1	0	0	110	2660	1000	44.2	2670	6374.2	161	3.58896	15.0493
13512.5	Seychelles	4	stool	33	0	26.9964	0	0	0	117	904	523	67.4	2360	3854.4	276	4.23371	22.7898
13512.5	Seychelles	4	stool	37	1	34.2936	1	0	0	100	2520	919	136	4110	7685	145	3.42771	13.7482
13512.5	Seychelles	4	stool			26.9314	0	1	NA	149	2300	935	47.8	4030	7312.8	195	3.77136	17.5998
13512.4	Ghana	1	stool	26	1	20.64	0	0	0	101	1117.13	975.38	129.81	3125.71	5348.02	191	3.62515	16.746
13512.5	Seychelles	4	stool	50	1			1	1	127	384	174	122	1150	1830	251	3.74988	24.0447
13512.5	Seychelles	4	stool	48	1	33.5884	1	0	0	103	792	315	91.3	1430	2628.3	192	3.92449	17.7899
13512.5	Seychelles	4	stool	40	0	19.0551	0	0	0	112	3780	1010	33.5	4950	9773.5	155	3.42924	14.5638
13512.5	Seychelles	4	stool					NA	NA	92	2070	1050	9.76	4710	7839.76	88	3.15698	9.67174
13512.5	Seychelles	4	stool	43	1	41.9871	1	0	0	114	1300	538	79.9	3210	5127.9	200	3.62168	17.3856
13512.5	Seychelles	4	stool	48	1	33.8867	1	0	0	101	1350	832	36.2	3640	5858.2	109	2.5143	11.8102
13512.5	Seychelles	4	stool	51	1			0	0	99	605	283	102	1500	2490	163	3.52311	16.3599
13512.5	Seychelles	4	stool	33	1	30.3205	1	0	0	110	902	391	97.3	1520	2910.3	158	3.61411	14.4472
13512.5	Seychelles	4	stool	40	0	32.0847	1	0	0	116	1290	713	43.4	4230	6276.4	147	3.43502	15.1047
13512.5	Seychelles	4	stool	36	1			0	0	103	837	383	128	1890	3238	173	2.80422	17.1624
13512.5	Seychelles	4	stool	43	0	24.1988	0	1	1	153	566	408	42.3	2050	3066.3	141	2.86324	13.8258
13512.5	Seychelles	4	stool	35	1			0	0	100	378	90.6	72	1550	2090.6	218	3.91292	20.9099
13512.5	Seychelles	4	stool	50	1	28.4008	0	0	0	114	870	520	142	2270	3802	184	3.61407	17.6679
13512.5	Seychelles	4	stool	38	0	31.2948	1	1	0	135	2590	540	77.8	3740	6947.8	87	2.91888	9.38881
13512.5	Seychelles	4	stool	44	0	34.714	1	0	0	112	1090	809	59.6	4310	6268.6	118	3.27281	12.9899
13512.5	Seychelles	4	stool	41	0	19.1037	0	0	0	122	1510	792	127	3160	5589	179	3.37003	17.0055
13512.5	Seychelles	4	stool	40	0	35.682	1	0	0	109	454	334	13.8	1360	2161.8	84	2.62653	10.1141
13512.5	Seychelles	4	stool	44	0	28.6082	0	0	0	120	5600	910	40.9	4700	11250.9	177	3.90508	17.2434
13512.5	Seychelles	4	stool	41	1	44.444	1	0	0	115	1810	1060	99.2	3910	6879.2	129	3.04746	13.0158
13512.5	Seychelles	4	stool	42	0	24.9257	0	0	0	100	2670	348	24.9	3630	6672.9	128	3.28176	11.9534
13512.5	Seychelles	4	stool	42	0	29.8426	0	0	0	115	1360	1310	29.2	4940	7639.2	148	3.32724	13.3776
13512.5	Seychelles	4	stool	40	0	30.8801	1	0	0	115	2690	611	6.29	3040	6347.29	77	2.73884	9.31484
13512.5	Seychelles	4	stool	46	0	22.6946	0	0	0	95	1630	432	64.1	2010	4136.1	110	2.76005	11.8992
13512.5	Seychelles	4	stool	43	0			1	0	147	4300	2750	287	6370	13707	165	3.43327	16.1094
13512.5	Seychelles	4	stool	44	0	29.8303	0	0	0	113	447	743	2.89	3430	4622.89	75	2.27868	8.04855
13512.5	Seychelles	4	stool	48	0	35.9088	1	0	0	118	316	1130	2.24	4040	5488.24	101	3.07475	11.2113
13512.5	Seychelles	4	stool	48	0	23.9352	0	0	0	109	695	447	147	1850	3139	196	3.79431	17.5437
13512.5	Seychelles	4	stool	47	0	26.3412	0	1	1	208	2210	1070	241	3200	6721	205	3.43613	18.099
13512.5	Seychelles	4	stool	56	0	23.0204	0	0	0	104	1880	679	51.7	3370	5980.7	165	3.37365	14.7878
13512.5	Seychelles	4	stool	48	0	26.9186	0	1	0	132	1070	669	98.9	2790	4627.9	125	3.33897	13.2136
13512.5	Seychelles	4	stool	47	0	22.046	0	1	0	135	1290	306	86.8	2750	4432.8	212	3.31002	20.9157
13512.5	Seychelles	4	stool	47	0	22.4367	0	1	0	130	722	372	146	2110	3350	125	2.93657	13.5728
13512.5	Seychelles	4	stool	47	0	37.2355	1	1	0	281	1000	456	183	2510	4149	165	3.74355	14.9486
13512.5	Seychelles	4	stool	48	0	29.8039	0	0	0	117	641	199	76	1270	2186	208	3.78365	19.3225
13512.5	Seychelles	4	stool	46	0	28.0012	0	0	0	111	639	390	148	1240	2417	217	3.79572	17.9958
13512.5	Seychelles	4	stool	50	0	28.515	0	0	0	115	1460	523	7.71	2020	4010.71	70	2.5426	7.87495
13512.5	Seychelles	4	stool	52	0	31.3633	1	0	0	105	1490	320	13.2	2630	4453.2	122	2.7337	12.2039
13512.5	Seychelles	4	stool	51	0			NA	0	NA	1460	871	52	4370	6753	170	3.5824	15.5967
13512.3	Ghana	1	stool	39	0	23.5048	0	0	0	109	1800	1190	44.8	4130	7164.8	224	3.89474	19.4962
13512.3	Ghana	1	stool	33	1	32.7913	1	0	0	93	1200	796	79	2540	4615	145	3.49601	13.7129
13512.5	Seychelles	4	stool	40	1	22.3839	0	0	0	97	1650	374	182	4050	6256	234	3.36096	18.9091
13512.5	Seychelles	4	stool	49	1	37.7324	1	1	0	129	1330	394	63.5	3000	4787.5	170	2.89039	16.6761
13512.5	Seychelles	4	stool	45	0	29.0625	0	0	0	108	809	261	64.6	2140	3274.6	269	3.5468	21.2863
13512.5	Seychelles	4	stool	48	1	30.4157	1	0	0	99	1420	595	109	2020	4144	120	2.92538	11.8959
13512.5	Seychelles	4	stool	38	0	28.9515	0	0	0	107	1510	1260	146	3430	6346	261	3.53504	20.6373
13512.5	Seychelles	4	stool	51	1			0	0	114	468	153	143	1680	2444	278	3.55098	22.267
13512.3	Ghana	1	stool	46	1	26.3047	0	0	0	81	1120	556	130	3470	5276	251	3.29178	21.2758
13512.3	Ghana	1	stool	56	0	26.8631	0	0	0	90	2250	1230	108	5110	8698	280	4.17954	23.422
13512.5	Seychelles	4	stool	43	1	36.9914	1	0	0	120	985	483	91.1	3210	4769.1	168	3.29265	17.0397
13512.5	Seychelles	4	stool	34	1	27.8924	0	0	0	96	1060	907	89.6	3260	5316.6	159	3.26948	15.3437
13512.3	Ghana	1	stool	49	1	38.0804	1	0	0	102	927	852	33.4	3270	5082.4	291	3.65462	22.6306
13512.3	Ghana	1	stool	54	1	21.1471	0	0	0	105	1890	1930	121	5830	9771	242	3.39855	19.111
13512.5	Seychelles	4	stool	36	1	25.8669	0	0	0	94	796	413	119	2470	3798	180	3.1499	17.4654
13512.5	Seychelles	4	stool	44	0			0	0	110	1610	814	57	3270	5751	130	3.1333	14.917
13512.5	Seychelles	4	stool	33	1	29.6891	0	0	0	90	1970	1320	65.2	5060	8415.2	126	2.94152	12.3831
13512.3	Ghana	1	stool	55	1	18.1956	0	NA	0	NA	4900	1220	34.3	4150	10304.3	285	3.60294	21.7046
13512.3	Ghana	1	stool	46	0	26.9249	0	0	0	89	2670	1430	232	4700	9032	316	4.12033	23.9019
13512.5	Seychelles	4	stool	35	1	20.8933	0	0	0	90	423	78.7	76.8	1400	1978.5	237	3.73379	22.1718
13512.3	Ghana	1	stool	49	0	31.9026	1	0	0	94	4680	1380	34.8	5270	11364.8	158	3.08193	15.2484
13512.5	Seychelles	4	stool	35	1	25.7392	0	0	0	111	351	136	149	2050	2686	265	3.53278	21.266
13512.5	Seychelles	4	stool	34	0	40.0112	1	0	0	113	1830	1140	101	5160	8231	236	4.18701	19.7354
13512.5	Seychelles	4	stool	51	0	24.2644	0	1	0	137	1010	561	136	2270	3977	173	3.53701	17.0088
13512.5	Seychelles	4	stool	44	0	28.5413	0	0	0	116	2660	1030	29.5	4250	7969.5	159	3.47904	15.1327
13512.5	Seychelles	4	stool	43	0	32.2491	1	0	0	87	2980	217	33.3	3730	6960.3	136	3.49162	12.6152
13512.5	Seychelles	4	stool	47	1	22.4343	0	0	0	111	786	316	121	1210	2433	143	3.55784	13.2744
13512.5	Seychelles	4	stool	37	1	34.9284	1	0	0	101	696	469	38.1	3220	4423.1	180	3.78079	16.5342
13512.5	Seychelles	4	stool	49	1	25.6118	0	0	0	109	437	194	118	1520	2269	130	3.30939	13.9257
13512.5	Seychelles	4	stool	47	0	32.6627	1	0	0	100	2720	594	26.5	4640	7980.5	165	3.50358	15.84
13512.5	Seychelles	4	stool	48	0	28.3447	0	0	0	114	2000	389	1.03	3360	5750.03	111	2.54171	10.6723
13512.5	Seychelles	4	stool	38	1	25.7371	0	0	0	117	1100	558	199	2550	4407	135	2.64544	14.8858
13512.5	Seychelles	4	stool	49	1	30.0264	1	0	0	114	2590	980	36	5280	8886	173	3.70165	16.5823
13512.5	Seychelles	4	stool	36	1	35.3622	1	0	0	108	1370	588	28.4	4090	6076.4	122	3.01	13.1399
13512.5	Seychelles	4	stool	45	1	25.6058	0	0	0	111	623	443	108	2420	3594	163	3.08413	16.7031
13512.5	Seychelles	4	stool	49	1	26.7128	0	0	0	103	1200	639	147	2550	4536	202	3.97538	18.0636
13512.5	Seychelles	4	stool	51	0	28.6111	0	1	0	138	1830	1290	80	4950	8150	149	3.19381	13.2503
13512.5	Seychelles	4	stool	42	0	24.5076	0	0	0	104	3070	895	43	4770	8778	149	3.1729	14.1958
13512.5	Seychelles	4	stool	45	0	24.3932	0	0	0	103	2120	550	28.3	4070	6768.3	122	3.20156	11.8414
13512.5	Seychelles	4	stool	38	1	24.6648	0	0	0	112	1330	776	36.8	3660	5802.8	179	3.5536	16.5224
13512.M1810	USA	5	stool	55	1	27.2345	0	1	1	89	270.96	580.14	164.94	574.6	1590.64	168	2.84901	16.7856
13512.M4430	Jamaica	3	stool	47	0	25.4711	0	0	0	101	1633.34	657.09	141.98	1733.53	4165.94	102	2.38604	11.4871
13512.M3628	Ghana	1	stool	35	1	30.532	1	0	0	92	2627.99	1974.55	60.05	5302.59	9965.18	120	2.0674	13.6052
13512.M4435	Jamaica	3	stool	51	0	23.7756	0	0	0	122	652.08	828.56	280.55	813.28	2574.46	169	2.64111	16.2544
13512.M4440	Jamaica	3	stool	39	0	24.1031	0	0	0	109	1322.27	2083.59	476.76	2012.21	5894.83	180	3.29812	18.2881
13512.M4265	Jamaica	3	stool	51	0	21.2505	0	0	0	88	NA	NA	NA	NA	NA	186	3.30179	17.8542
13512.M2613	South Africa	2	stool	44	0	21.4	0	0	0	92	1239.1	1122.04	79.35	1409	3849.48	160	2.95863	16.5723
13512.M4338	Jamaica	3	stool	49	1	31.3144	1	0	0	98	664.83	916.27	51.5	1045.36	2677.96	166	3.40315	14.9487
13512.M4341	Jamaica	3	stool	47	1	28.933	0	0	0	89	187.23	178	110.33	459.83	935.39	207	3.48042	19.4215
13512.M2705	South Africa	2	stool	37	0	27.56	0	0	0	110	950.02	791.62	165.5	1110.39	3017.54	210	3.13223	19.628
13512.M4443	Jamaica	3	stool	51	0	30.1669	1	1	1	417	607.35	589.38	105.29	1657.12	2959.13	207	3.82943	19.1939
13512.M1006	USA	5	stool	48	0	18.8533	0	0	0	87	1028.23	778.45	161.16	2555.51	4523.36	221	3.49459	20.8805
13512.M1099	USA	5	stool	39	1	32.57	1	0	0	97	1024.16	1230.02	158.97	2375.96	4789.09	192	3.67907	17.3496
13512.M4346	Jamaica	3	stool	51	1	18.1716	0	0	0	83	1929.62	1561.26	55.55	2040.68	5587.12	208	3.50881	18.4465
13512.M2714A	South Africa	2	stool	29	1	55.28	1	0	0	71	2450.84	1859.8	42.04	1980.75	6333.43	165	3.1	15.5239
13512.M4349	Jamaica	3	stool	49	1	36.0502	1	0	0	122	34.71	1.56	1.41	460.73	498.4	123	0.604912	13.7923
13512.M1231	USA	5	stool	39	1	36.7284	1	0	0	108	299.62	391.16	33.51	861.15	1585.44	140	2.50702	13.8972
13512.M2737	South Africa	2	stool	25	1	20.52	0	0	0	78	218.1	98.31	44.06	378.17	738.64	236	3.64229	21.5335
13512.M4449	Jamaica	3	stool	47	0	25.3172	0	0	0	96	728.6	735.79	83.48	1622.66	3170.52	227	3.43615	21.6216
13512.M1238	USA	5	stool	41	0	23.4586	0	0	0	83	938.22	663.91	136.85	1431.64	3170.63	131	2.61223	14.2231
13512.M1271	USA	5	stool	49	1	29.298	0	0	0	79	709.69	1048.07	9.49	2953.36	4720.6	109	2.0131	13.2937
13512.M4459	Jamaica	3	stool	51	0	24.8778	0	0	0	119	777.02	1025.31	28.84	1328.24	3159.42	114	3.1766	13.0415
13512.M2759	South Africa	2	stool					NA	NA	NA	2595.01	1630.51	96.57	1651.12	5973.22	220	3.39062	19.887
13512.M1307	USA	5	stool	43	1	42.4953	1	0	0	96	970.82	748.05	218.92	2591.84	4529.63	175	3.15179	15.9124
13512.M4353	Jamaica	3	stool	49	0	22.0136	0	0	0	7	1761.24	1502.79	65.64	1875.87	5205.54	172	3.47878	17.063
13512.M4460	Jamaica	3	stool	41	0	18.8583	0	0	0	92	838.39	1586.33	182.93	1532.76	4140.4	212	3.48136	19.9827
13512.M3006	Ghana	1	stool	52	0	20.8103	0	0	0	86	1370	1510	76.3	4510	7466.3	205	3.27728	18.2267
13512.M1314	USA	5	stool	51	0	28.1114	0	0	0	96	615.6	560.38	69.96	1560.45	2806.39	106	2.4482	11.6951
13512.M3029	Ghana	1	stool	44	1	27.5829	0	0	0	104	1650	1120	117	4130	7017	318	4.08636	26.85
13512.M4358	Jamaica	3	stool	47	0	27.7735	0	0	0	100	385.74	799.54	181.63	867.51	2234.42	235	3.78138	23.4444
13512.M4461	Jamaica	3	stool	40	0	28.9157	0	0	0	91	2583.92	1978.95	15.3	3228.83	7807	158	3.53539	15.0921
13512.M1329	USA	5	stool	38	0	56.3031	1	1	1	100	859.33	790.35	180.41	3236.8	5066.89	162	3.24321	16.0565
13512.M3169	Ghana	1	stool	42	1	38.2833	1	NA	0	NA	4680	1100	53.2	4990	10823.2	271	4.03312	25.685
13512.M1353	USA	5	stool	51	1	37.2732	1	0	0	98	187.9	212.3	69.4	580.1	1049.7	188	2.50816	19.1518
13512.M4364	Jamaica	3	stool	33	0	19.3276	0	0	0	81	433.24	472.86	175.85	612.8	1694.76	213	3.16958	20.8207
13512.M3234	Ghana	1	stool	46	0	19.6146	0	0	0	112	2660	844	72.7	4120	7696.7	216	3.54241	19.1958
13512.M4464	Jamaica	3	stool	46	0	20.5698	0	0	0	79	1005.47	787.67	149.96	1230.4	3173.5	189	3.29335	18.4813
13512.M1363	USA	5	stool	40	0	41.1123	1	0	0	100	516.71	1169.66	100.14	1455.36	3241.87	140	2.61093	12.8653
13512.M1406	USA	5	stool	43	1	28.8955	0	1	1	97	382.25	418.43	213.71	1270.4	2284.79	145	1.28309	16.9256
13512.M3235	Ghana	1	stool	56	1	20.5137	0	0	0	102	956	1820	19	3410	6205	97	2.8892	10.8455
13512.M4365	Jamaica	3	stool	40	1			0	0	94	1024.7	924.84	193.96	1739.52	3883.03	228	3.58868	21.5273
13512.M1447	USA	5	stool	43	1	36.1089	1	0	0	94	695.61	593.42	64.04	1938.18	3291.25	118	2.64319	12.079
13512.M4468	Jamaica	3	stool	38	0	19.0266	0	0	0	88	2698.51	1617.76	58.94	2262.43	6637.64	122	2.58725	12.53
13512.M3295	Ghana	1	stool	52	1	30.7384	1	0	0	114	1970	774	65.3	3550	6359.3	112	2.04613	12.1494
13512.M4469	Jamaica	3	stool	33	0	20.5838	0	0	0	95	765.01	581.46	230.99	1054.05	2631.51	287	4.00081	27.4447
13512.M4367	Jamaica	3	stool	47	0	18.0212	0	0	0	88	1432.98	2310.46	131.56	2801.82	6676.82	131	2.80606	14.1122
13512.M4470	Jamaica	3	stool	46	0			0	0	108	1268.3	1246.46	60.88	1877.37	4453	118	2.80432	13.2158
13512.M3322	Ghana	1	stool	33	1	17.5648	0	1	0	128	691.54	359	145.99	2540.8	3737.34	300	4.03863	25.2005
13512.M4369	Jamaica	3	stool	36	1	25.9795	0	0	0	83	346.74	223.13	153.63	897.78	1621.28	191	3.28252	18.9938
13512.M4533	Jamaica	3	stool	29	0	29.6825	0	0	0	89	853.91	1177.87	373.3	1571.71	3976.8	229	2.50446	21.8348
13512.M4475	Jamaica	3	stool	37	0	28.2402	0	0	0	96	2363.97	1993.68	361.58	2439.23	7158.46	162	2.79642	16.2311
13512.M3383	Ghana	1	stool	52	0	21.7873	0	0	0	102	1636.43	1464.39	166.63	5344.63	8612.07	320	4.24324	27.2853
13512.M4542	Jamaica	3	stool	35	0	33.8222	1	0	0	100	1872.32	2677.58	116.78	2992.1	7658.79	101	2.19091	11.7549
13512.M4478	Jamaica	3	stool	32	0	22.6642	0	NA	0	NA	441.56	2124.26	2.66	1893.85	4462.32	98	2.7541	10.9694
13512.M3457	Ghana	1	stool	30	1	37.0256	1	0	0	88	1602.72	1872.78	85.74	4581.97	8143.2	250	3.63683	21.7722
13512.M4545	Jamaica	3	stool	28	1	27.3038	0	0	0	84	NA	NA	NA	NA	NA	199	3.66504	18.5373
13512.M4546	Jamaica	3	stool	34	1	60.9663	1	0	0	105	2293.74	1804.84	111.71	2180.02	6390.31	107	2.35102	12.2577
13512.M4491	Jamaica	3	stool	47	0	27.9378	0	0	0	80	777.21	535.3	122.03	895.83	2330.37	113	2.41005	12.5185
13512.M1597	USA	5	stool	51	0	32.7556	1	0	0	119	3180.92	1615.78	57.97	2876.73	7731.4	149	3.49552	14.7272
13512.M3501	Ghana	1	stool	37	1	36.2464	1	0	0	105	1370.85	992.56	38.05	2724.56	5126.02	141	2.68071	14.9948
13512.M4547	Jamaica	3	stool	32	0	19.1747	0	0	0	104	1289.19	1812.32	340.43	1609.17	5051.11	206	3.41497	19.2794
13512.M4495	Jamaica	3	stool	42	0	24.4709	0	0	0	77	1780.09	1861.12	77.16	2153.05	5871.42	154	3.24717	15.7402
13512.M1630	USA	5	stool	51	1	26.1121	0	0	0	104	1129.86	1118.08	234.2	1567.22	4049.36	252	4.05208	22.154
13512.M4376	Jamaica	3	stool	47	0	30.868	1	0	0	91	2049.76	2244.51	98.94	2801.82	7195.03	138	2.75589	15.4151
13512.M4550	Jamaica	3	stool	37	0	25.5032	0	0	0	108	928.03	998.93	213.46	1514.78	3655.19	208	3.56914	19.6524
13512.M3512	Ghana	1	stool	30	1	25.7974	0	0	0	102	1687.17	1465.27	205.49	4221.66	7579.58	252	3.90651	22.5768
13512.M1631	USA	5	stool	54	1	46.9949	1	0	0	97	753	666.32	128.12	987.83	2535.26	170	3.57808	17.597
13512.M4551	Jamaica	3	stool	31	1	53.2777	1	0	0	91	1153.89	1530.05	131.74	1350.72	4166.39	107	2.47028	12.0626
13512.M4502	Jamaica	3	stool	49	1	29.6599	0	0	0	118	1803.01	1432.22	118.64	2340.34	5694.22	217	3.64525	20.7311
13512.M4553	Jamaica	3	stool	47	1	30.9545	1	0	0	95	564.1	499.9	106.1	1231.6	2401.71	192	2.88488	18.7484
13512.M4554	Jamaica	3	stool	36	1	33.5547	1	0	0	101	1011.39	242.92	65.54	786.16	2106	62	2.10619	9.54514
13512.M3513	Ghana	1	stool	45	1			NA	0	NA	1681.99	777.57	27.72	4509.91	6997.19	93	2.24594	11.471
13512.M3514	Ghana	1	stool	41	1	35.6863	1	1	0	195	2681.7	3551.71	35.38	4984.32	11253.1	122	1.87971	12.6928
13512.M1632	USA	5	stool	55	1	38.1431	1	1	1	150	580	791.4	89.82	1475.22	2936.44	96	1.66318	10.5536
13512.M4503	Jamaica	3	stool	36	0	20.2537	0	0	0	86	479.63	395.04	167.97	622.24	1664.89	117	1.6512	13.1419
13512.M4563	Jamaica	3	stool	42	1	23.3808	0	0	0	87	1447.4	1178.75	83.38	1651.12	4360.65	209	3.77595	18.9222
13512.M3516	Ghana	1	stool	35	1			1	1	NA	1330.11	963.04	134.1	2339.33	4766.57	165	3.13493	15.3162
13512.M4508	Jamaica	3	stool	29	0	28.5168	0	0	0	100	1949.95	955.62	107.96	2102.11	5115.65	199	2.86313	19.2813
13512.M4566	Jamaica	3	stool	36	1	58.1311	1	0	0	115	780.54	1374.4	62.61	1961.27	4178.82	173	3.08263	16.4543
13512.M1639	USA	5	stool	41	1	33.8445	1	0	0	101	486.29	591.57	61.18	626.74	1765.78	210	3.17116	19.7887
13512.M4568	Jamaica	3	stool	40	1	50.1909	1	0	0	92	1070.35	1616.88	124.86	2262.43	5074.52	153	2.71023	14.6755
13512.M4510	Jamaica	3	stool	31	1	38.7096	1	1	1	240	1717.99	1028.39	59.75	2385.29	5191.42	86	1.72607	10.5539
13512.M4570	Jamaica	3	stool	39	1	19.2878	0	0	0	103	747.82	870.32	34.09	1405.85	3058.09	69	1.53845	9.4634
13512.M3520	Ghana	1	stool	50	1	21.2084	0	0	0	104	1094.53	1018.99	157.38	2351.64	4622.54	242	3.67152	21.358
13512.M4520	Jamaica	3	stool	29	1	23.067	0	NA	0	NA	764.64	739.96	125.88	977.49	2607.97	236	3.8747	20.7767
13512.M4573	Jamaica	3	stool	44	1	31.3209	1	0	0	98	1091.42	3213.98	65.79	2824.29	7195.48	110	2.22057	12.1602
13512.M4575	Jamaica	3	stool	46	1	28.6326	0	0	0	105	996.6	1353.74	109.8	2060.16	4520.3	94	2.22894	10.9175
13512.M1641	USA	5	stool	53	1	30.8637	1	0	0	102	816.21	816.47	193.53	1026.03	2852.24	191	2.73296	17.5876
13512.M4576	Jamaica	3	stool	43	1	24.6609	0	0	0	119	1024.88	965.51	172.23	1333.04	3495.66	194	3.28572	19.3842
13512.M3532	Ghana	1	stool	38	1	20.8855	0	0	0	88	1603.83	1161.29	189.81	2795.42	5750.35	169	3.30483	17.214
13512.M4521	Jamaica	3	stool	28	1	35.2645	1	0	0	92	1225.97	1360.56	453.31	1934.3	4974.15	218	3.86241	19.9191
13512.M1648	USA	5	stool	51	1	21.6947	0	0	0	98	2293.74	2394	160.35	2485.68	7333.76	122	3.49625	12.8949
13512.M3575	Ghana	1	stool	49	1	34.0521	1	0	0	100	2336.85	2529.64	101.72	4044.5	9012.72	140	2.23991	15.0529
13512.M4580	Jamaica	3	stool	48	0	20.1456	0	0	0	98	1674.56	1093.02	67.68	1935.8	4771.05	193	3.36907	19.8884
13512.M4589	Jamaica	3	stool	46	1	25.1969	0	0	0	99	183.57	80.64	33.31	633.19	930.71	112	1.95861	12.1255
13512.M4522	Jamaica	3	stool	36	0	24.4795	0	0	0	102	3456.31	1357.7	9.32	2589.06	7412.39	124	2.33409	14.2205
13512.M1651	USA	5	stool	47	0	32.3109	1	0	0	113	814.91	998.71	421.97	1223.51	3459.1	214	3.4977	20.4735
13512.M3588	Ghana	1	stool	55	0			NA	0	NA	3186.18	920.75	72.51	4882.23	9061.67	137	2.89672	14.7191
13512.M4597	Jamaica	3	stool	37	1	25.324	0	0	0	91	1880.15	937.84	133.26	3380.93	6332.18	223	3.97542	21.5659
13512.M1787	USA	5	stool	53	1	35.9041	1	1	1	113	1026.54	779.09	386.04	1576.21	3767.89	179	2.52767	19.0889
13512.M3603	Ghana	1	stool	33	0	21.412	0	0	0	97	1006.01	587.69	154.11	2484.95	4232.77	307	4.05297	25.9404
13512.M4524	Jamaica	3	stool	40	1	42.4375	1	0	0	100	NA	NA	NA	NA	NA	108	1.84977	13.878
13512.M4695	Jamaica	3	stool	43	1	19.1954	0	0	0	101	1237.14	579.94	119.04	3313.67	5249.79	204	2.77289	18.4292
13512.M4599	Jamaica	3	stool	47	1	23.5787	0	0	0	107	1445.89	1804.49	789.87	3103.49	7143.75	173	2.58017	17.392
13512.M4602	Jamaica	3	stool	34	0	31.3385	1	0	0	103	1016.38	473.5	155.4	2860.88	4506.16	125	2.14028	14.5918
13512.M4625	Jamaica	3	stool	42	1	15.8127	0	0	0	103	1040.82	295.17	164.88	1268.3	2769.17	152	1.57303	15.0792
13512.M4696	Jamaica	3	stool	53	1	24.5089	0	0	0	95	2377.97	726.56	118.29	3408.55	6631.36	131	3.43733	13.6895
13512.M4697	Jamaica	3	stool	46	1	43.3078	1	0	0	102	318.99	218.16	171.88	1334.36	2043.39	181	3.02349	16.3358
13512.M4631	Jamaica	3	stool	28	1	31.346	1	0	0	92	3226.92	1554.79	106.42	3676.38	8564.52	172	2.59937	18.0421
13512.M4603	Jamaica	3	stool	43	1	26.1123	0	0	0	72	1245.88	696.07	73.96	2145.06	4160.97	149	2.31155	14.7421
13512.M4638	Jamaica	3	stool	42	0	21.7414	0	0	0	92	1209.73	346.62	207.53	2762.39	4526.27	236	3.7003	21.8754
13512.M4720	Jamaica	3	stool	35	1	37.4687	1	1	1	91	787.32	1078.47	15.16	2082.6	3963.55	134	2.73093	12.5525
13512.M4698	Jamaica	3	stool	48	0	21.1073	0	0	0	94	1651.98	417.82	46.92	2470.54	4587.26	152	2.75056	16.1333
13512.M4607	Jamaica	3	stool	36	1	25.629	0	0	0	106	902.89	591.92	179.65	1849.6	3524.06	233	3.79069	19.2432
13512.M4641	Jamaica	3	stool	46	0	29.3827	0	0	0	90	1248.84	824.71	217.54	1979.31	4270.4	94	1.46291	11.6738
13512.M4609	Jamaica	3	stool	44	1	32.277	1	NA	0	NA	678.42	649.19	24.72	1866.42	3218.75	162	2.19937	17.1094
13512.M4612	Jamaica	3	stool	31	1	28.4613	0	0	0	93	391.74	58.49	106.99	1143.03	1700.24	167	2.0292	18.049
13512.M4699	Jamaica	3	stool	42	1	28.9285	0	0	0	80	499.15	237.37	119.7	1330.75	2186.97	83	1.47644	10.0682
13512.M4745	Jamaica	3	stool	56	1	30.9687	1	0	0	99	717.84	422.4	198.13	1437.64	2776.01	268	3.98471	24.4515
13512.M4746	Jamaica	3	stool	52	1	32.7048	1	0	0	100	2084.61	556.33	121.04	3559.88	6321.86	129	2.75842	13.9624
13512.M4655	Jamaica	3	stool	39	0	19.9998	0	0	0	90	505.23	356.14	136.65	1142.43	2140.45	212	2.93532	21.1963
13512.M4747	Jamaica	3	stool	46	0	26.8251	0	0	0	101	904.07	847.62	270.24	1616.6	3638.53	167	3.35784	15.7539
13512.M4700	Jamaica	3	stool	44	1	42.3094	1	0	0	109	792.8	486.9	172.03	1208.25	2659.97	215	3.39132	20.8471
13512.M4656	Jamaica	3	stool	31	0	17.4344	0	0	0	84	1595.68	768.67	9.92	3021.82	5396.09	166	2.78725	18.1035
13512.M4386	Jamaica	3	stool	47	0	26.5096	0	0	0	103	693.11	643.46	228.03	906.62	2471.22	254	3.51569	24.5475
13512.M4749	Jamaica	3	stool	37	1			0	0	94	1304.1	495.88	38.93	2877.69	4716.61	155	3.28822	15.6054
13512.M4701	Jamaica	3	stool	50	1	29.4618	0	0	0	91	1074.31	523.55	109.01	2589.44	4296.31	322	4.3514	25.7644
13512.M4721	Jamaica	3	stool	43	1	31.9843	1	1	1	127	807.32	691.49	45.39	2901.71	4445.91	97	2.59241	11.3514
13512.M4750	Jamaica	3	stool	33	1	30.7548	1	0	0	104	1441.89	682.15	230.2	3041.03	5395.28	134	2.82978	14.1818
13512.M4661	Jamaica	3	stool	47	0	27.4366	0	0	0	104	1346.33	440.02	79.52	2547.41	4413.28	193	3.30459	17.9414
13512.M4722	Jamaica	3	stool	51	0			0	0	95	1887.56	1452.05	242.25	3350.9	6932.77	249	3.21368	23.6824
13512.M4662	Jamaica	3	stool	40	0	19.8327	0	0	0	99	1164.09	1430.73	110.32	3528.66	6233.8	120	2.44144	12.9138
13512.M4664	Jamaica	3	stool	38	0	26.4464	0	0	0	105	1325.29	1788.63	12.98	3544.27	6671.17	231	3.72808	20.6774
13512.M4680	Jamaica	3	stool	43	1	39.9517	1	0	0	91	444.33	5.85	8.78	634.87	1093.83	228	3.73169	21.8347
13512.M4702a	Jamaica	3	stool	42	0	30.5447	1	0	0	94	940.22	537.12	55.82	2048.97	3582.14	153	3.60876	15.6677
13512.M4681	Jamaica	3	stool	34	1	21.5821	0	0	0	72	497.97	207.41	149.21	1357.18	2211.76	203	2.96152	19.0438
13512.M4684	Jamaica	3	stool	50	0	20.1255	0	0	0	109	998.45	488.13	12.46	2454.93	3953.96	361	4.53036	29.3985
13512.M4389	Jamaica	3	stool	32	0	20.2888	0	0	0	87	1959.19	900.66	76.27	1836.91	4773.03	148	3.50171	15.1655
13512.M4723	Jamaica	3	stool	42	1	38.6846	1	0	0	104	955.04	696.25	223.66	2659.1	4534.05	187	2.81909	19.2788
13512.M4751	Jamaica	3	stool	44	0	45.531	1	1	1	217	1748.29	717.57	59.19	3367.72	5892.77	152	2.70552	15.336
13512.M4685	Jamaica	3	stool	48	1	36.5974	1	1	1	110	873.55	1030.71	187.78	2735.97	4828.01	240	3.38446	21.3305
13512.M4724	Jamaica	3	stool	51	1	30.2282	1	0	0	91	793.84	536.24	43.16	3009.81	4383.05	165	1.902	17.3824
13512.M4686	Jamaica	3	stool	52	1	25.5391	0	0	0	98	1058.31	648.49	124.58	3033.83	4865.2	224	3.32015	19.8984
13512.M4725	Jamaica	3	stool	53	1	34.2592	1	0	0	94	1086.31	435.44	91.45	2593.05	4206.24	145	3.11172	14.3077
13512.M4687	Jamaica	3	stool	39	1	38.4642	1	0	0	86	962.89	533.07	220.6	1631.01	3347.57	129	1.60142	13.4895
13512.M4689	Jamaica	3	stool	38	1	30.9763	1	0	0	98	1091.2	1800.97	41.08	2602.65	5535.9	124	2.11483	13.9829
13512.M4752	Jamaica	3	stool	51	1	25.5928	0	1	1	184	922.89	694.48	62.56	2776.8	4456.74	227	3.67724	22.4405
13512.M4391	Jamaica	3	stool	53	1	31.8063	1	0	0	113	1781.57	1758.02	112.09	2758.37	6410.05	106	2.50829	12.3636
13512.M4703	Jamaica	3	stool	50	1	43.3169	1	0	0	85	324.91	131.3	89.3	852.38	1397.9	218	3.76826	20.8918
13512.M4726	Jamaica	3	stool	55	1	35.4192	1	NA	0	NA	1096.83	839.69	43.65	3580.3	5560.47	256	3.60769	22.087
13512.M4690	Jamaica	3	stool	45	0	36.0404	1	0	0	87	857.7	347.68	107.67	1619	2932.05	165	2.5518	17.0702
13512.M4691	Jamaica	3	stool	54	0	23.5936	0	0	0	77	664.65	408.13	58.99	2182.29	3314.05	239	3.35233	19.8797
13512.M4693	Jamaica	3	stool	37	1	34.9953	1	0	0	95	631.31	461.34	51.41	1552.94	2697.01	334	4.23262	28.8023
13512.M4727	Jamaica	3	stool	49	1	28.402	0	0	0	101	959.48	1302.09	30.9	3054.24	5346.72	203	3.05247	18.3665
13512.M4393	Jamaica	3	stool	52	1	40.0796	1	0	0	102	695.14	835.15	63.35	1606.17	3199.82	163	2.69322	15.1667
13512.M4694	Jamaica	3	stool	55	0	21.0526	0	0	0	92	1512.71	903.3	77.41	3743.64	6237.07	108	2.25602	12.33
13512.M4771	Jamaica	3	stool	37	1	26.117	0	0	0	94	672.2	438.96	135.14	2417.69	3664	195	3.41242	16.9596
13512.M4753	Jamaica	3	stool	50	1	32.6745	1	0	0	93	884.81	401.96	168.96	1996.13	3451.86	260	3.98662	23.2387
13512.M4704	Jamaica	3	stool	45	1	37.5919	1	0	0	106	879.03	545.93	149.21	2235.14	3809.31	139	1.94914	14.9544
13512.M4772	Jamaica	3	stool	51	1	32.9297	1	0	0	101	766.73	97.26	101.31	1135.7	2101	93	2.6832	11.164
13512.M4729a	Jamaica	3	stool	48	0	24.181	0	0	0	91	1170.91	619.59	199.19	1964.9	3954.59	234	3.92863	20.4708
13512.M4705	Jamaica	3	stool	47	1	35.0665	1	1	1	299	896.37	1899.65	12.96	3132.31	5941.29	116	2.82262	12.1452
13512.M4754	Jamaica	3	stool	55	0	28.0142	0	0	0	111	922.3	335.52	43.73	1597.38	2898.93	125	3.19841	14.2318
13512.M4398	Jamaica	3	stool	52	0	22.5424	0	0	0	111	438.79	160.37	98.36	780.46	1477.98	238	3.95201	21.1159
13512.M4755	Jamaica	3	stool	44	1	29.171	0	0	0	91	304.47	103.41	103.11	908.95	1419.93	265	3.80014	26.2823
13512.M4773	Jamaica	3	stool	30	1	42.3584	1	0	0	81	2189.8	787	48.33	3724.43	6749.56	178	3.37989	17.0099
13512.M4706	Jamaica	3	stool	46	1	25.7948	0	0	0	100	840.36	588.05	217.33	1879.63	3525.37	208	3.73358	20.1036
13512.M4730	Jamaica	3	stool	41	0	23.144	0	0	0	89	485.22	294.11	150.27	1376.39	2306	217	2.77595	21.7485
13512.M4756	Jamaica	3	stool	44	1	46.4179	1	0	0	115	2099.43	970.8	34.58	2989.39	6094.19	155	2.23094	16.2584
13512.M4731	Jamaica	3	stool	55	1	32.0569	1	0	0	83	936.67	592.45	93.35	2331.22	3953.68	100	2.92637	12.4031
13512.M4404	Jamaica	3	stool	42	0	25.6736	0	0	0	78	747.27	625.43	173.63	669.74	2216.06	147	3.00097	15.4648
13512.M4707	Jamaica	3	stool	52	1	41.315	1	1	1	116	183.13	81.03	4.3	697.8	966.25	112	2.49064	11.5493
13512.M4732	Jamaica	3	stool	52	1	45.1616	1	0	0	118	862.88	1808.02	70.47	2841.66	5583.03	194	3.51518	17.0215
13512.M4774a	Jamaica	3	stool	50	0	26.4791	0	0	0	101	1252.25	262.39	89.49	1975.71	3579.84	152	3.75424	15.6286
13512.M4733	Jamaica	3	stool	41	0	25.4296	0	0	0	85	3203.22	648.31	22.33	2874.09	6747.95	141	3.08364	14.6162
13512.M4410	Jamaica	3	stool	47	1	32.0862	1	0	0	78	502.37	243.14	143.13	1051.8	1940.44	138	1.51199	15.8646
13512.M4757	Jamaica	3	stool	37	1	34.6621	1	0	0	112	683.17	845.15	38.73	2791.22	4358.26	156	3.13713	14.7231
13512.M4708	Jamaica	3	stool	55	1	33.7112	1	0	0	91	1657.91	740.12	100.95	2342.03	4841.01	153	2.29889	16.166
13512.M4734	Jamaica	3	stool	35	1	35.0047	1	0	0	91	629.38	210.94	65.47	1413.62	2319.41	220	3.14618	19.7176
13512.M4759	Jamaica	3	stool	53	1	27.5171	0	0	0	108	653.83	365.83	180.99	1974.51	3175.17	268	4.02436	23.8186
13512.M4413	Jamaica	3	stool	50	0	33.3557	1	0	0	113	861.31	72	156.61	1559.73	2649.64	234	3.23532	22.4358
13512.M4735	Jamaica	3	stool	51	0	21.8629	0	0	0	107	1274.18	1301.74	453.46	2970.17	5999.54	208	3.49506	19.8659
13512.M4709	Jamaica	3	stool	54	1	22.7073	0	0	0	94	345.21	256.58	139.37	983.05	1724.21	174	3.4525	17.5268
13512.M4775	Jamaica	3	stool	41	1	30.7174	1	0	0	105	603.16	690.08	173.66	2513.78	3980.68	119	2.72718	12.3473
13512.M4736a	Jamaica	3	stool	47	1	41.5334	1	0	0	94	828.36	725.32	251.44	2277.17	4082.3	244	3.28037	20.9982
13512.M4737	Jamaica	3	stool	36	1	38.504	1	NA	0	NA	426.7	65.98	130.67	728.43	1351.77	210	3.07669	19.6782
13512.M4738	Jamaica	3	stool	37	1	26.2913	0	0	0	91	419.44	161.56	90.94	636.07	1308.01	148	2.15709	13.7836
13512.M4739	Jamaica	3	stool	49	0	29.9043	0	0	0	102	2487.61	1419.98	526.38	4021.08	8455.05	134	3.18573	13.1984
13512.M4740	Jamaica	3	stool	48	1	25.3614	0	1	1	185	371.88	140.99	109.2	1275.5	1897.58	269	3.58101	24.7291
13512.M4776	Jamaica	3	stool	33	0	19.6381	0	0	0	78	1520.12	592.28	140.24	3119.1	5371.74	264	3.96446	26.3225
13512.M4741	Jamaica	3	stool	50	1	25.2104	0	0	0	100	937.41	715.28	83.05	1819.58	3555.31	199	3.40167	18.4737
13512.M4710	Jamaica	3	stool	37	1	23.8169	0	0	0	97	470.26	276.84	21.53	1520.52	2289.15	157	3.37238	15.6182
13512.M4743	Jamaica	3	stool	39	1	48.3225	1	0	0	106	1506.79	597.56	90.53	2561.82	4756.7	230	3.31366	21.5365
13512.M4760	Jamaica	3	stool	38	1	28.4624	0	0	0	103	1204.99	717.74	60.32	2702.34	4685.39	220	3.81543	19.4546
13512.M4744	Jamaica	3	stool	48	1	33.7011	1	1	1	340	2453.53	1018.02	107.26	3361.71	6940.52	171	2.41513	17.753
13512.M4777a	Jamaica	3	stool	46	1	39.3367	1	0	0	95	1071.34	1379.8	74.6	3365.31	5891.06	190	3.40223	18.9601
13512.M4761	Jamaica	3	stool	36	1	46.7324	1	0	0	93	774.43	452.71	90.61	1970.91	3288.66	200	3.38614	19.6142
13512.M4790	Jamaica	3	stool	48	0	25.0038	0	0	0	95	1614.94	1206.23	15.07	2023.75	4859.99	135	3.27184	13.0716
13512.M4762	Jamaica	3	stool	56	1	22.6805	0	1	1	339	636.94	498	201.75	1807.57	3144.25	196	3.30813	17.7396
13512.M4711	Jamaica	3	stool	51	0	26.4725	0	0	0	112	900.66	336.93	38.32	1703.07	2978.99	199	3.85701	17.4469
13512.M4778a	Jamaica	3	stool	47	1	25.3836	0	0	0	123	810.29	532.71	283.92	2077.8	3704.72	195	3.44997	18.8497
13512.M4763	Jamaica	3	stool	48	1	36.7179	1	0	0	88	943.33	478.08	68.77	2368.45	3858.64	181	3.07252	17.5561
13512.M4791	Jamaica	3	stool	31	0	34.4588	1	0	0	102	1229.43	1089.22	156.79	2310.8	4786.24	127	2.638	13.0464
13512.M4764	Jamaica	3	stool	35	1	39.7273	1	0	0	94	672.65	610.6	156.61	2004.54	3444.39	212	3.87548	19.1417
13512.M4765	Jamaica	3	stool	55	1	38.0243	1	0	0	113	654.87	481.79	156.95	1472.48	2766.08	192	3.67687	18.4232
13512.M4792	Jamaica	3	stool	56	1	43.8635	1	0	0	93	1466.64	231.38	24.82	1993.73	3716.56	97	2.19673	10.8662
13512.M4766	Jamaica	3	stool	50	0	29.5464	0	0	0	100	538.86	575.89	194.33	1620.2	2929.28	256	3.70951	23.2995
13512.M4767	Jamaica	3	stool	55	1	37.8843	1	NA	0	NA	793.1	599.15	57.05	2750.38	4199.68	195	3.85662	18.4343
13512.M4414	Jamaica	3	stool	34	0	27.8676	0	0	0	100	5282.43	1003.32	28.87	2797.32	9111.95	159	3.70738	17.3515
13512.M4793	Jamaica	3	stool	51	1	34.6058	1	0	0	97	873.4	550.86	95.55	2230.33	3750.15	165	3.41076	15.3191
13512.M4779a	Jamaica	3	stool	59	1	24.3339	0	0	0	96	835.47	193.84	127.58	2275.97	3432.87	217	3.0502	21.0679
13512.M4712	Jamaica	3	stool	39	1	26.083	0	1	1	167	744.8	711.58	219.78	2434.51	4110.67	185	2.76784	19.7675
13512.M4714	Jamaica	3	stool	50	1	31.6072	1	0	0	64	408.33	217.81	59.03	1072.89	1758.06	165	3.49768	15.8176
13512.M4418	Jamaica	3	stool	33	0	28.8436	0	0	0	86	2271.56	1182.27	314.44	2524.63	6292.9	117	3.32451	13.4408
13512.M4715	Jamaica	3	stool	51	1	26.5899	0	1	1	211	197.94	65.2	88.22	928.52	1279.89	203	3.62044	19.8631
13512.M4716	Jamaica	3	stool	49	0	32.0969	1	0	0	57	756.8	236.49	138.06	1783.54	2914.89	66	1.57151	7.61243
13512.M4419	Jamaica	3	stool	50	0	19.9184	0	0	0	117	1092.16	2189.77	107.4	1419.64	4808.97	139	3.0708	14.6136
13512.M4768a	Jamaica	3	stool	39	1	32.9786	1	0	0	90	1046.6	1296.45	58.34	2805.63	5207.02	203	3.4969	17.507
13512.M4429	Jamaica	3	stool	47	0	28.9352	0	0	0	94	3042.3	5306.8	171.46	3216.84	11737.4	155	3.008	14.9326
13512.M4794	Jamaica	3	stool	53	1	18.8898	0	0	0	82	728.21	677.39	251.24	1931.27	3588.11	220	3.59293	18.9821
13512.M4717	Jamaica	3	stool	46	1	26.2428	0	0	0	106	951.93	493.94	144.39	2759.99	4350.25	278	3.8894	25.7426
13512.M4795	Jamaica	3	stool	38	1	25.9013	0	0	0	97	285.65	447.6	227.14	784.16	1744.55	148	2.82799	15.2743
13512.M4780a	Jamaica	3	stool	34	1	35.0119	1	0	0	91	1038.9	1288.34	158.4	2808.03	5293.68	138	2.70356	14.5801
13512.M4814	Jamaica	3	stool	54	1	31.3273	1	0	0	90	847.77	736.6	66.65	2266.36	3917.38	238	3.57867	20.9552
13512.M4796	Jamaica	3	stool	51	1	26.0099	0	0	0	97	560.04	201.42	116.51	1673.05	2551.02	259	3.74052	21.9546
13512.M4815	Jamaica	3	stool	37	1	32.5449	1	0	0	95	1086.9	1039.35	250.42	2836.86	5213.53	115	2.8508	12.0721
13512.M4718	Jamaica	3	stool	54	1	39.0675	1	1	1	155	719.46	1397.25	5.3	2681.92	4803.93	112	2.41959	11.1353
13512.M4719	Jamaica	3	stool	54	0	25.1129	0	1	1	162	519.6	192.43	85.16	826.56	1623.74	128	2.62232	14.174
13512.M4769	Jamaica	3	stool	44	1	28.0938	0	0	0	86	1774.96	1205.87	105.38	3054.24	6140.45	141	3.06118	16.0428
13512.M4797	Jamaica	3	stool	49	1	29.5873	0	1	1	115	1511.23	1103.31	201.48	4347.76	7163.79	132	2.69133	14.1575
13512.M4816	Jamaica	3	stool	48	1	25.6833	0	NA	0	NA	161.49	12.79	59.99	746.33	980.61	215	2.46945	24.1086
13512.M4798	Jamaica	3	stool	37	1	47.6854	1	0	0	101	1514.2	611.48	80.27	2477.75	4683.7	158	2.57399	15.5376
13512.M4781	Jamaica	3	stool	54	0	29.3063	0	0	0	96	3573.62	1705.63	225.71	4603.59	10108.5	155	2.86942	15.4122
13512.M4770	Jamaica	3	stool	50	1	40.1308	1	0	0	96	1484.56	670.16	92.49	2494.56	4741.78	108	1.78825	11.4268
13512.M4817	Jamaica	3	stool	44	1	26.1991	0	0	0	89	870.29	542.05	166.94	2374.46	3953.74	203	3.47727	18.7777
13512.M4839	Jamaica	3	stool	55	1	24.5872	0	0	0	98	508.93	343.45	56.74	2236.34	3145.46	201	3.27271	19.0512
13512.M4799	Jamaica	3	stool	52	1	26.4979	0	0	0	114	928.96	256.4	45.2	1878.43	3108.99	102	2.94783	11.8332
13512.M4782a	Jamaica	3	stool	40	0	25.705	0	0	0	92	486.56	247.41	108.48	1121.53	1963.98	176	3.15286	16.0617
13512.M4864	Jamaica	3	stool	53	1	19.1484	0	0	0	106	1614.94	918.99	63.3	3459	6056.23	128	2.69448	13.181
13512.M4840	Jamaica	3	stool	43	1	41.1829	1	0	0	91	531.3	348.21	99.64	1090.42	2069.57	226	3.62172	21.3041
13512.M4800a	Jamaica	3	stool	50	1	29.756	0	0	0	94	1366.48	1082.17	211	3095.08	5754.73	186	3.45347	17.0682
13512.M4865	Jamaica	3	stool	40	1	30.4118	1	0	0	100	944.96	856.25	327.02	1969.71	4097.94	174	3.05083	16.8001
13512.M4842	Jamaica	3	stool	53	1	36.376	1	0	0	106	719.61	259.92	163.33	1597.38	2740.25	274	3.68771	24.1926
13512.M4818	Jamaica	3	stool	47	1	65.9064	1	0	0	94	1021.71	1420.86	38.83	4016.28	6497.68	172	3.52982	15.3466
13512.M4866	Jamaica	3	stool	57	1	33.0201	1	0	0	118	339.88	265.74	133.5	1408.82	2147.94	180	2.86124	18.6348
13512.M4867	Jamaica	3	stool	54	1	27.6635	0	0	0	99	1095.2	697.83	146.58	2087.41	4027.01	187	3.35238	18.1253
13512.M4819	Jamaica	3	stool	33	1	32.9496	1	0	0	104	385.51	197.19	102.8	1514.51	2200.02	163	2.15913	18.5391
13512.M4843	Jamaica	3	stool	35	0	22.0574	0	0	0	87	1016.38	63.69	52.31	2322.81	3455.19	69	2.49296	9.95332
13512.M4868	Jamaica	3	stool	43	1	23.0691	0	0	0	103	988.23	825.94	98.21	2472.94	4385.32	223	3.73962	20.9665
13512.M4783	Jamaica	3	stool	52	1	32.8552	1	0	0	103	1311.36	532.89	77.78	2248.35	4170.38	222	3.24215	21.9275
13512.M4820	Jamaica	3	stool	39	0	31.9114	1	0	0	100	NA	NA	NA	NA	NA	133	3.26927	13.7421
13512.M4869	Jamaica	3	stool	36	1	28.0157	0	0	0	92	746.28	1198.3	68.98	2230.33	4243.89	154	2.73399	14.9513
13512.M4844	Jamaica	3	stool	47	1	38.7968	1	0	0	87	2819.48	1000.93	99.74	4102.75	8022.91	148	2.94851	14.3683
13512.M4845	Jamaica	3	stool	47	1	33.6859	1	1	0	214	741.99	141.73	86.59	1078.53	2048.84	74	2.53364	9.42128
13512.M4801	Jamaica	3	stool	40	1	29.8593	0	0	0	94	865.4	803.21	44.1	2035.76	3748.48	153	3.32379	15.4711
13512.M4802	Jamaica	3	stool	30	0	24.1524	0	0	0	87	1969.05	996.17	35.83	2349.23	5350.28	171	3.27035	15.9389
13512.M4821	Jamaica	3	stool	42	1	24.8132	0	0	0	78	1663.84	996.88	224.07	4376.59	7261.38	208	3.72012	18.2688
13512.M4846	Jamaica	3	stool	37	1	42.5451	1	0	0	114	851.48	455.18	21.79	2015.35	3343.79	112	2.69518	11.7818
13512.M4784	Jamaica	3	stool	40	0	20.9104	0	0	0	95	561.82	797.04	58.66	1733.1	3150.63	225	3.5303	21.4821
13512.M4803	Jamaica	3	stool	60	1	28.8789	0	0	0	116	1336.26	1069.13	382.58	3592.31	6380.27	220	3.95144	19.9622
13512.M4870	Jamaica	3	stool	58	1	32.8718	1	0	0	92	2671.32	1027.72	23.33	2432.11	6154.47	298	3.7544	25.3004
13512.M4804	Jamaica	3	stool	45	1	28.9852	0	0	0	95	338.4	90.22	71.8	787.88	1288.3	176	3.33048	17.0523
13512.M4822	Jamaica	3	stool	37	1	35.2547	1	0	0	118	2579.47	1199.88	19.02	2615.87	6414.23	88	1.52991	10.2408
13512.M4785	Jamaica	3	stool	47	1	31.2459	1	0	0	91	1081.86	843.04	305.16	2112.63	4342.69	191	2.41462	19.4442
13512.M4805	Jamaica	3	stool	39	1	33.9117	1	0	0	92	679.61	523.9	239.6	1358.38	2801.49	227	3.23433	22.3112
13512.M4823	Jamaica	3	stool	39	1	36.991	1	0	0	112	879.63	566.02	271.67	2414.09	4131.4	225	3.97208	20.5178
13512.M4806	Jamaica	3	stool	36	1	34.4056	1	0	0	80	1554.2	1021.55	177.34	3364.11	6117.2	152	3.23727	14.9327
13512.M4786	Jamaica	3	stool	54	1	30.1454	1	0	0	96	1323.07	1010.45	243.07	2828.45	5405.03	155	3.00346	15.3675
13512.M4847	Jamaica	3	stool	49	1	34.3887	1	0	0	107	678.87	357.55	129.5	2137.85	3303.77	242	3.85803	21.6787
13512.M4807	Jamaica	3	stool	55	1	29.4941	0	1	1	190	1275.06	1228.96	29.64	3748.45	6282.11	126	3.06553	12.9474
13512.M4787	Jamaica	3	stool	40	1	35.9708	1	0	0	97	702.72	528.66	94.92	1889.24	3215.54	152	3.31696	14.7235
13512.M4848	Jamaica	3	stool	38	1	35.4806	1	1	0	140	1573.46	773.25	96.08	2905.32	5348.11	118	2.16936	12.0852
13512.M4871	Jamaica	3	stool	38	1	44.5927	1	1	1	74	334.25	225.91	163.14	943.06	1666.36	253	3.61786	22.22
13512.M4872	Jamaica	3	stool	45	0	21.9626	0	0	0	87	701.39	570.6	166.39	1712.68	3151.06	171	2.92406	18.0782
13512.M4825	Jamaica	3	stool	55	0	30.4535	1	1	1	126	968.37	667.17	148.66	2348.03	4132.24	180	3.70175	17.9112
13512.M4788	Jamaica	3	stool	44	1	26.6193	0	0	0	101	570.86	389.62	63.69	1902.45	2926.62	186	3.27229	18.1088
13512.M4808	Jamaica	3	stool	52	0	27.4129	0	0	0	101	4561.85	1391.08	17.69	4686.46	10657.1	137	2.85568	14.969
13512.M4809	Jamaica	3	stool	56	1	35.2642	1	0	0	84	417.07	181.15	230.41	1656.23	2484.86	189	2.92297	18.1375
13512.M4810	Jamaica	3	stool			32.5145	1	NA	NA	105	561.08	215.16	173.03	1361.98	2311.25	221	3.56762	20.2705
13512.M4789	Jamaica	3	stool	53	0	22.8736	0	0	0	91	1450.63	576.24	138.41	2710.75	4876.03	142	2.91189	13.4945
13512.M4849	Jamaica	3	stool	48	0	19.6099	0	0	0	94	1249.14	493.59	25.37	2076.6	3844.7	155	2.51139	15.8223
13512.M4873	Jamaica	3	stool	39	1	33.4791	1	0	0	97	900.52	1098.38	173.64	3370.12	5542.66	154	3.19034	15.0211
13512.M4811	Jamaica	3	stool	54	1	34.6675	1	0	0	116	1433.15	694.48	122.98	3332.89	5583.51	118	2.14513	12.8768
13512.M4850a	Jamaica	3	stool	39	1	29.7596	0	0	0	108	1324.25	1904.94	382.37	2063.39	5674.95	151	2.17856	15.2627
13512.M4874	Jamaica	3	stool	37	0	24.3974	0	0	0	90	1601.61	1277.07	350.92	2394.87	5624.47	277	3.25065	26.1113
13512.M4890	Jamaica	3	stool	50	1	34.8383	1	0	0	94	217.35	91.93	125.15	836.64	1271.08	314	4.4263	27.8528
13512.M4826	Jamaica	3	stool	47	0	31.6725	1	0	0	100	910	971.85	2.08	4066.72	5950.65	120	3.20636	13.1355
13512.M4891	Jamaica	3	stool	56	1	43.4419	1	NA	0	NA	874.74	401.96	113.43	2035.76	3425.88	106	2.93205	12.6392
13512.M4875	Jamaica	3	stool	47	1	27.3725	0	0	0	99	624.2	207.76	213.66	1980.51	3026.13	204	3.40038	19.902
13512.M4812	Jamaica	3	stool	59	1	28.8133	0	0	0	104	1090.46	1047.8	60.69	4162.8	6361.75	187	3.18545	19.0557
13512.M4813	Jamaica	3	stool	56	1	26.0977	0	1	1	217	615.9	492.01	89.3	2122.24	3319.45	181	2.73134	17.6144
13512.M4851	Jamaica	3	stool	41	1	29.7277	0	0	0	99	557.23	183.8	70.27	1124.77	1936.07	268	3.92222	22.6079
13512.M4827	Jamaica	3	stool	43	1	31.9634	1	0	0	88	826.44	585.4	250.63	1974.51	3636.98	237	3.60056	21.5337
13512.M4852	Jamaica	3	stool	51	1	47.6332	1	1	0	222	770.14	893.79	64.81	3156.33	4885.07	207	3.28364	18.1154
13512.M4828	Jamaica	3	stool	34	1	32.6149	1	0	0	104	1154.76	707.7	113.28	2862.08	4837.82	177	3.39319	17.2253
13512.M4916	Jamaica	3	stool	45	1	33.2225	1	0	0	96	504.48	412.35	176.13	1426.84	2519.81	236	3.42981	21.5612
13512.M4917	Jamaica	3	stool	48	1	35.8728	1	1	1	243	NA	NA	NA	NA	NA	176	3.63029	16.3805
13512.M4876	Jamaica	3	stool	49	1	33.6082	1	0	0	92	870.29	302.22	151.3	1972.11	3295.91	201	3.36961	18.5639
13512.M4877	Jamaica	3	stool	59	1	34.6442	1	0	0	102	601.53	361.43	138.49	1970.91	3072.35	275	4.42772	25.4577
13512.M4893	Jamaica	3	stool	55	1	36.7301	1	0	0	82	946.45	703.12	89.69	2874.09	4613.34	240	3.50205	23.0631
13512.M4853	Jamaica	3	stool	38	1	36.8066	1	0	0	91	1497.9	804.44	136.75	2866.88	5305.98	140	2.7618	13.5121
13512.M4829	Jamaica	3	stool	53	1	22.7734	0	0	0	108	43.38	19.1	21.47	224.95	308.91	208	2.61791	21.4974
13512.M4878	Jamaica	3	stool	37	1	34.2531	1	0	0	87	1640.13	519.32	19.04	4541.13	6719.62	66	1.97537	9.17868
13512.M4918	Jamaica	3	stool	54	1	33.4838	1	0	0	88	NA	NA	NA	NA	NA	122	2.66474	12.8155
13512.M4830	Jamaica	3	stool	38	1	36.183	1	0	0	108	894.44	241.42	115.12	1412.42	2663.41	149	3.20425	13.8336
13512.M4831	Jamaica	3	stool	45	1	25.5428	0	0	0	93	649.68	484.08	72.29	2230.33	3436.38	155	3.21523	15.5894
13512.M4894	Jamaica	3	stool	47	1	43.3493	1	0	0	94	924.81	603.2	198.74	2865.68	4592.44	218	3.50926	20.0885
13512.M4919	Jamaica	3	stool	46	1	27.8311	0	1	1	197	NA	NA	NA	NA	NA	157	3.16233	15.1089
13512.M4854	Jamaica	3	stool	56	0	26.5356	0	0	0	108	5676.01	425.4	98.68	4257.69	10457.8	308	4.06794	25.912
13512.M4920	Jamaica	3	stool	42	1	20.6371	0	0	0	94	NA	NA	NA	NA	NA	138	2.11085	13.9577
13512.M4832	Jamaica	3	stool	54	1	21.9304	0	0	0	98	5339.69	2229.18	127.05	6220.19	13916.1	158	2.40263	16.2803
13512.M4879	Jamaica	3	stool	46	1	36.4096	1	1	1	100	2031.27	870.53	25.23	4138.78	7065.81	136	2.91648	13.8122
13512.M4921	Jamaica	3	stool	54	1	28.2039	0	0	0	93	NA	NA	NA	NA	NA	201	2.89573	19.9065
13512.M4895	Jamaica	3	stool	57	0	19.2117	0	0	0	124	3164.7	561.08	18.18	2549.81	6293.77	142	2.63181	15.5454
13512.M4855	Jamaica	3	stool	35	1	36.7125	1	0	0	99	727.91	344.86	133.79	1436.44	2643.01	314	3.8435	27.4393
13512.M4880	Jamaica	3	stool	35	1	34.9871	1	0	0	98	294.99	35.98	67.61	894.29	1292.88	290	3.54154	28.2476
13512.M4833	Jamaica	3	stool	54	0	37.969	1	0	0	110	727.32	303.98	214.06	2475.34	3720.7	250	3.56068	22.0385
13512.M4922	Jamaica	3	stool	52	1	25.8536	0	0	0	92	NA	NA	NA	NA	NA	185	2.63126	19.1863
13512.M4923	Jamaica	3	stool					NA	NA	NA	NA	NA	NA	NA	NA	56	2.15549	8.29972
13512.M4924	Jamaica	3	stool					NA	NA	NA	NA	NA	NA	NA	NA	192	3.65428	17.4778
13512.M4896	Jamaica	3	stool	23	0	27.3947	0	0	0	76	936.52	551.57	182.47	2160.67	3831.22	234	3.69515	22.7307
13512.M4881	Jamaica	3	stool	44	0	19.495	0	0	0	108	1841.63	734.66	180.89	2689.13	5446.31	220	2.90122	21.5322
13512.M4856	Jamaica	3	stool	55	1	33.6365	1	0	0	121	569.68	393.85	197.17	1978.11	3138.81	257	4.10364	22.1257
13512.M4897	Jamaica	3	stool	50	1	37.611	1	0	0	85	594.12	403.02	203.93	1420.83	2621.9	257	3.7978	22.381
13512.M4834	Jamaica	3	stool	53	0	30.4927	1	0	0	104	76.85	296.58	44.3	1354.77	1772.51	114	2.8012	13.5406
13512.M4925	Jamaica	3	stool	49	1	29.7265	0	0	0	89	NA	NA	NA	NA	NA	121	2.7152	13.794
13512.M4857	Jamaica	3	stool	51	0	28.1269	0	0	0	88	1194.02	1086.04	30.68	2727.56	5038.31	135	2.38794	13.8253
13512.M4926	Jamaica	3	stool	49	1	25.8133	0	1	1	152	NA	NA	NA	NA	NA	199	3.64791	18.6314
13512.M4882	Jamaica	3	stool	57	1	30.8921	1	1	1	116	694.57	331.47	196.58	2869.28	4091.91	217	3.34892	21.0076
13512.M4858	Jamaica	3	stool	47	1	27.0048	0	0	0	108	521.97	526.9	161.53	2110.23	3320.62	231	3.99954	20.5125
13512.M4898	Jamaica	3	stool	56	1	21.1148	0	0	0	70	800.66	440.55	188.74	1949.29	3379.23	182	3.20161	17.7729
13512.M4927	Jamaica	3	stool	52	1	31.6443	1	NA	0	NA	NA	NA	NA	NA	NA	98	2.58821	11.5002
13512.M4835	Jamaica	3	stool	56	1	27.2737	0	0	0	95	478.41	222.92	116.63	1145.55	1963.51	254	3.67508	23.1812
13512.M4899	Jamaica	3	stool	48	0	31.8235	1	1	1	104	NA	NA	NA	NA	NA	170	3.84838	15.6844
13512.M4928	Jamaica	3	stool	54	0	23.3682	0	0	0	97	NA	NA	NA	NA	NA	164	3.27819	17.5452
13512.M4859	Jamaica	3	stool	56	0	29.9301	0	1	1	132	1346.92	386.1	125.52	2701.14	4559.68	196	3.63871	18.7049
13512.M4929	Jamaica	3	stool	49	0	24.3664	0	0	0	77	NA	NA	NA	NA	NA	233	3.56332	21.4353
13512.M4836	Jamaica	3	stool	50	1	36.8463	1	0	0	100	880.37	716.69	141.2	2011.74	3750	175	3.07386	15.9314
13512.M4900	Jamaica	3	stool	41	1	36.7394	1	0	0	107	484.19	144.15	111.63	1563.75	2303.72	285	3.95464	26.7176
13512.M4883	Jamaica	3	stool	56	0	26.4494	0	1	1	163	664.79	703.82	0.74	3097.48	4466.84	128	3.41188	12.2083
13512.M4930	Jamaica	3	stool	48	1	23.2233	0	1	1	220	NA	NA	NA	NA	NA	107	2.1777	12.964
13512.M4860	Jamaica	3	stool	49	1	31.9154	1	0	0	119	590.57	437.2	160.51	1459.26	2647.54	141	2.79986	14.8493
13512.M4837	Jamaica	3	stool	56	1	30.2273	1	0	0	104	311.14	56.21	112.89	1153.84	1634.08	264	3.39691	24.4205
13512.M4884	Jamaica	3	stool	54	1	35.0643	1	0	0	102	1179.65	411.12	74.17	1727.1	3392.03	137	3.27189	13.9484
13512.M4885	Jamaica	3	stool	64	0	26.1399	0	0	0	86	1258.62	1290.81	339.48	1668.24	4557.16	94	0.838231	11.2381
13512.M4931	Jamaica	3	stool	34	1	33.6863	1	0	0	80	NA	NA	NA	NA	NA	194	3.52303	18.1163
13512.M4861	Jamaica	3	stool	34	1			NA	0	NA	755.32	564.43	90.73	1751.12	3161.6	200	3.3018	19.439
13512.M4838	Jamaica	3	stool	56	1	31.8807	1	0	0	115	1155.5	537.82	175.11	3201.97	5070.41	137	2.80899	14.2017
13512.M4903	Jamaica	3	stool	56	1	35.2327	1	0	0	111	1471.97	623.82	234.29	3055.45	5385.52	161	2.76509	17.095
13512.M4932	Jamaica	3	stool	39	1	39.9327	1	1	1	106	NA	NA	NA	NA	NA	209	3.85231	19.9683
13512.M4886	Jamaica	3	stool	53	1	34.1606	1	0	0	112	737.84	571.83	97.49	2142.66	3549.82	205	3.71304	18.4629
13512.M4862	Jamaica	3	stool	56	1	39.2827	1	0	0	123	1629.76	1452.93	372.57	3628.34	7083.61	309	3.93822	27.3098
13512.M4904	Jamaica	3	stool	31	1	29.7519	0	0	0	87	301.95	195.08	133.85	1051.03	1681.91	232	3.83704	21.8553
13512.M5056	Seychelles	4	stool	49	1	26.0845	0	0	0	110	766	450	103	3960	5279	121	2.49418	13.1465
13512.M5061	Seychelles	4	stool	51	1	28.4403	0	0	0	104	2490	3710	52.9	10400	16652.9	148	3.16288	15.6609
13512.M4933	Jamaica	3	stool	38	1	21.1556	0	0	0	83	NA	NA	NA	NA	NA	207	2.38647	22.8512
13512.M4888	Jamaica	3	stool	58	1	30.5493	1	0	0	101	765.1	285.12	41.55	2177.49	3269.25	109	2.42978	11.3151
13512.M4863	Jamaica	3	stool					NA	NA	NA	398.25	116.29	93.41	954.83	1562.78	270	3.45881	23.7491
13512.M4934	Jamaica	3	stool	36	1	25.9871	0	0	0	81	NA	NA	NA	NA	NA	218	3.81882	21.4841
13512.M4905	Jamaica	3	stool	42	1	32.5576	1	1	1	111	522.56	240.72	89.83	986.41	1839.52	220	3.65414	20.906
13512.M4889	Jamaica	3	stool	56	1	39.4379	1	0	0	91	963.34	653.25	246.75	2159.47	4022.8	192	2.66991	18.4312
13512.M5065	Seychelles	4	stool	40	0	25.0341	0	0	0	112	1110	553	19.3	2820	4502.3	163	2.95846	17.9489
13512.M5429	Seychelles	4	stool	51	0	37.021	1	0	0	119	1160	550	37	2680	4427	162	2.77488	16.7514
13512.M4935	Jamaica	3	stool	34	1	29.7805	0	1	1	279	NA	NA	NA	NA	NA	155	2.87509	15.6907
13512.M4936	Jamaica	3	stool	55	1	41.9363	1	0	0	91	NA	NA	NA	NA	NA	121	2.71344	13.7867
13512.M5441	Seychelles	4	stool	40	1			0	0	99	814	562	42.4	2440	3858.4	124	2.50002	13.5226
13512.M5068	Seychelles	4	stool	49	1	20.5296	0	0	0	81	552	330	35.9	3310	4227.9	213	3.33974	21.5579
13512.M4906	Jamaica	3	stool	40	1	28.8887	0	0	0	82	480.63	347.51	148.5	1030.61	2007.25	218	3.53682	20.893
13512.M5070	Seychelles	4	stool	49	1	22.9112	0	0	0	96	1170	600	191	4700	6661	147	2.33171	16.3681
13512.M5443	Seychelles	4	stool	40	0	28.601	0	0	0	99	882	476	94.9	3050	4502.9	189	2.96527	18.7038
13512.M5154	Seychelles	4	stool	32	1	45.8475	1	0	0	98	1340	411	16.4	2920	4687.4	130	2.78318	14.6911
13512.M5445	Seychelles	4	stool	32	1			0	0	96	1070	829	352	3740	5991	208	3.0229	20.6373
13512.M5165	Seychelles	4	stool	36	1	43.1776	1	0	0	91	878	232	99.8	1900	3109.8	132	3.27333	14.5675
13512.M4907	Jamaica	3	stool	58	0	20.5477	0	0	0	90	1166.32	1147.02	38.46	3114.3	5466.09	117	2.84307	13.4414
13512.M5022	Seychelles	4	stool	44	0	30.2605	1	1	1	167	NA	NA	NA	NA	NA	201	3.75548	19.3505
13512.M5213	Seychelles	4	stool	49	1	29.8255	0	1	1	257	511	105	105	1400	2121	268	3.78195	24.1534
13512.M5226	Seychelles	4	stool	47	0	23.6958	0	0	0	118	914	249	62	2610	3835	141	3.3095	14.1264
13512.M5027	Seychelles	4	stool	51	1	25.7031	0	0	0	95	NA	NA	NA	NA	NA	147	2.88479	14.6667
13512.M5447	Seychelles	4	stool	38	0	31.1905	1	0	0	110	982	300	84.9	2270	3636.9	253	3.73367	23.8218
13512.M5037	Seychelles	4	stool	39	1	24.9998	0	0	0	97	776	216	45.8	1860	2897.8	95	2.49559	12.2455
13512.M5479	Seychelles	4	stool	45	0	39.419	1	0	0	96	888	1050	172	4910	7020	107	2.46907	11.6474
13512.M5239	Seychelles	4	stool	50	1	29.6774	0	0	0	105	1430	452	26.2	3410	5318.2	243	3.84247	23.0134
13512.M5247	Seychelles	4	stool	44	1	29.3894	0	1	1	233	660	293	147	1370	2470	191	3.43529	18.3212
13512.M5054	Seychelles	4	stool	51	1	34.8161	1	1	1	149	835	316	254	3510	4915	206	3.18032	20.3599
13512.M5480	Seychelles	4	stool	33	0			0	0	113	682	1340	58.7	4060	6140.7	85	1.67103	11.2072
13512.M5503	Seychelles	4	stool	38	0	23.782	0	0	0	99	1460	577	35.1	2800	4872.1	133	3.25425	12.4951
13512.M5261	Seychelles	4	stool	44	0	29.9103	0	0	0	112	974	1320	20.5	4730	7044.5	149	3.24191	14.9045
13512.M4908	Jamaica	3	stool	55	1	30.2645	1	0	0	88	808.81	442.84	118.37	2238.74	3608.75	232	3.50691	21.8593
13512.M5513	Seychelles	4	stool	46	0	27.5783	0	0	0	98	4010	974	42.5	4930	9956.5	171	3.44793	17.0683
13512.M5274	Seychelles	4	stool					NA	NA	104	194	43.1	69	361	667.1	117	1.38747	16.2614
13512.M4909	Jamaica	3	stool	47	1	30.0596	1	0	0	79	1973.49	1503.69	134.69	4030.69	7642.56	215	3.67144	20.3956
13512.M5281	Seychelles	4	stool	36	1	30.6285	1	0	0	108	891	512	78	1460	2941	146	2.66529	15.4094
13512.M5288	Seychelles	4	stool	48	1	32.0908	1	0	0	102	189	88.3	49	678	1004.3	233	3.30217	21.433
13512.M5570	Seychelles	4	stool					NA	NA	NA	NA	NA	NA	NA	NA	195	3.63787	19.4099
13512.M4910	Jamaica	3	stool	35	1	26.5061	0	0	0	8	658.87	195.43	48.04	2091.01	2993.35	234	3.61347	22.3421
13512.M5306	Seychelles	4	stool	42	1	23.5858	0	0	0	106	242	155	131	1140	1668	204	2.9618	19.8918
13512.M5310	Seychelles	4	stool	37	0	24.3847	0	0	0	117	1500	829	74.9	4000	6403.9	231	3.11179	21.836
13512.M4911	Jamaica	3	stool	49	1	28.8817	0	1	1	80	317.21	130.67	133.1	870.03	1451.01	190	2.55874	20.9592
13512.M5314	Seychelles	4	stool	45	1	28.3325	0	0	0	99	2770	1160	291	5660	9881	177	2.8832	18.7089
13512.M5333	Seychelles	4	stool	49	1	29.7661	0	0	0	98	963	232	77.1	1550	2822.1	135	2.12426	14.1748
13512.M4912	Jamaica	3	stool	55	1	30.1492	1	0	0	92	1007.19	652.9	62.52	2797.22	4519.83	311	4.26934	25.1867
13512.M5339	Seychelles	4	stool	52	1	31.7535	1	0	0	109	757	371	37.3	2610	3775.3	267	4.16809	24.6778
13512.M4913	Jamaica	3	stool	41	1	33.5755	1	0	0	85	871.18	596.33	84.13	2547.41	4099.05	181	3.19052	17.518
13512.M5342	Seychelles	4	stool	35	0	25.0183	0	0	0	115	2480	631	15.2	4160	7286.2	216	3.11436	20.1086
13512.M4914	Jamaica	3	stool	44	1	35.6312	1	1	1	255	1398.63	753.69	149.68	2565.42	4867.43	216	3.73169	20.0257
13512.M4915	Jamaica	3	stool	44	0	27.1886	0	0	0	78	763.47	200.01	70.53	1209.45	2243.46	192	3.21641	18.125
13512.M5346	Seychelles	4	stool	33	1			0	0	105	544	183	163	1750	2640	258	4.04156	23.4184
13512.M5365	Seychelles	4	stool	41	0	17.9512	0	0	0	108	1990	1040	8.59	4150	7188.59	94	2.62242	9.97938
13512.M5393	Seychelles	4	stool	46	0			0	0	115	1110	524	191	2900	4725	269	4.05772	26.5686
13512.M5415	Seychelles	4	stool	45	0	31.4909	1	0	0	120	2050	584	81.7	4390	7105.7	211	3.58857	20.5132

## Sheet: Fig.2
Differentially abundant taxa among countries (Fig. 2a) or obesity status (Fig. 2b) by Ancombc. Tests adjusted for age, sex, country (obesity status), bmi (for country). Shown are representative taxa with >1.4 log fold change in at least one group for country only. se- standard error of beta; q-val FDR corrected p values; ci-low and up- lower and upper bound of 95% confidence interval, star- FDR-a…
Fig. 2a
asv	log_fold_change	se	p_val	q_val	Kingdom	Phylum	Class	Order	Family	Genus	Species	Taxa	ci_low	ci_up	star	type
ASV10084	1.60877	0.184478	2.77e-18	8.7e-18	k__Bacteria	p__Firmicutes	c__Clostridia	o__Clostridia_UCG-014	f__Clostridia_UCG-014	Clostridia_UCG-014	NA	ASV10084_Clostridia_UCG-014	1.24719	1.97035	***	Ghana-USA
ASV10349	-2.15758	0.136824	5.09e-56	8.68e-55	k__Bacteria	p__Firmicutes	c__Bacilli	o__Erysipelotrichales	f__Erysipelotrichaceae	[Clostridium]_innocuum	NA	ASV10349_[Clostridium]_innocuum	-2.42576	-1.88941	***	Ghana-USA
ASV10646	0.515825	0.218015	0.017981	0.0220383	k__Bacteria	p__Firmicutes	c__Negativicutes	o__Veillonellales-Selenomonadales	f__Veillonellaceae	Dialister	NA	ASV10646_Dialister	0.088516	0.943134	*	Ghana-USA
ASV10945	1.51627	0.150452	6.9e-24	2.95e-23	k__Bacteria	p__Firmicutes	c__Negativicutes	o__Veillonellales-Selenomonadales	f__Veillonellaceae	Veillonella	NA	ASV10945_Veillonella	1.22139	1.81116	***	Ghana-USA
ASV11120	-1.38263	0.136287	3.49e-24	1.54e-23	k__Bacteria	p__Firmicutes	c__Clostridia	o__Lachnospirales	f__Lachnospiraceae	Anaerostipes	NA	ASV11120_Anaerostipes	-1.64975	-1.11551	***	Ghana-USA
ASV11364	-2.24923	0.17723	6.63e-37	5.47e-36	k__Bacteria	p__Firmicutes	c__Clostridia	o__Lachnospirales	f__Lachnospiraceae	Sellimonas	NA	ASV11364_Sellimonas	-2.5966	-1.90185	***	Ghana-USA
ASV11529	-2.45516	0.132932	3.65e-76	1.45e-74	k__Bacteria	p__Firmicutes	c__Clostridia	o__Lachnospirales	f__Lachnospiraceae	Eisenbergiella	NA	ASV11529_Eisenbergiella	-2.71571	-2.19461	***	Ghana-USA
ASV165	2.76703	0.160136	6.75e-67	1.79e-65	k__Bacteria	p__Proteobacteria	c__Gammaproteobacteria	o__Pasteurellales	f__Pasteurellaceae	Haemophilus	NA	ASV165_Haemophilus	2.45316	3.0809	***	Ghana-USA
ASV1716	-1.38109	0.156639	1.18e-18	3.9e-18	k__Bacteria	p__Bacteroidota	c__Bacteroidia	o__Bacteroidales	f__Rikenellaceae	Alistipes	NA	ASV1716_Alistipes	-1.6881	-1.07408	***	Ghana-USA
ASV1853	-1.17573	0.146259	9.08e-16	2.55e-15	k__Bacteria	p__Bacteroidota	c__Bacteroidia	o__Bacteroidales	f__Tannerellaceae	Parabacteroides	NA	ASV1853_Parabacteroides	-1.46239	-0.889058	***	Ghana-USA
ASV227	2.94548	0.177064	3.88e-62	9.27e-61	k__Bacteria	p__Proteobacteria	c__Gammaproteobacteria	o__Enterobacterales	f__Enterobacteriaceae	Enterobacteriaceae	NA	ASV227_Enterobacteriaceae	2.59843	3.29252	***	Ghana-USA
ASV2718	2.40728	0.146057	4.96e-61	1.08e-59	k__Bacteria	p__Firmicutes	c__Bacilli	o__RF39	f__RF39	Bacilli_RF39	NA	ASV2718_Bacilli_RF39	2.12101	2.69355	***	Ghana-USA
ASV3067	3.09902	0.137156	4.87e-113	1.16e-110	k__Bacteria	p__Firmicutes	c__Bacilli	o__Lactobacillales	f__Leuconostocaceae	Weissella	NA	ASV3067_Weissella	2.83019	3.36785	***	Ghana-USA
ASV3652	-2.02681	0.115453	5.42e-69	1.62e-67	k__Bacteria	p__Firmicutes	c__Clostridia	o__Peptostreptococcales-Tissierellales	f__Anaerovoracaceae	[Eubacterium]_brachy	NA	ASV3652_[Eubacterium]_brachy	-2.2531	-1.80053	***	Ghana-USA
ASV3819	-0.670823	0.188614	0.000376	0.000534	k__Bacteria	p__Firmicutes	c__Clostridia	o__Peptostreptococcales-Tissierellales	f__Anaerovoracaceae	Mogibacterium	NA	ASV3819_Mogibacterium	-1.04051	-0.30114	***	Ghana-USA
ASV4633	0.843826	0.157002	7.67e-08	1.37e-07	k__Bacteria	p__Firmicutes	c__Clostridia	o__Oscillospirales	f__Oscillospiraceae	Oscillospiraceae_UCG-002	NA	ASV4633_Oscillospiraceae_UCG-002	0.536102	1.15155	***	Ghana-USA
ASV5363	1.36422	0.14413	2.93e-21	1.05e-20	k__Bacteria	p__Actinobacteriota	c__Coriobacteriia	o__Coriobacteriales	f__Atopobiaceae	Olsenella	NA	ASV5363_Olsenella	1.08173	1.64672	***	Ghana-USA
ASV5405	-1.64423	0.138225	1.25e-32	8.8e-32	k__Bacteria	p__Actinobacteriota	c__Coriobacteriia	o__Coriobacteriales	f__Eggerthellaceae	Adlercreutzia	NA	ASV5405_Adlercreutzia	-1.91515	-1.37331	***	Ghana-USA
ASV551	-1.37388	0.161774	2.02e-17	6.04e-17	k__Bacteria	p__Bacteroidota	c__Bacteroidia	o__Bacteroidales	f__Bacteroidaceae	Bacteroides	NA	ASV551_Bacteroides	-1.69095	-1.0568	***	Ghana-USA
ASV5519	-2.19484	0.170493	6.35e-38	5.62e-37	k__Bacteria	p__Actinobacteriota	c__Coriobacteriia	o__Coriobacteriales	f__Eggerthellaceae	Eggerthella	NA	ASV5519_Eggerthella	-2.52901	-1.86068	***	Ghana-USA
ASV5665	2.47999	0.13203	1.03e-78	4.93e-77	k__Bacteria	p__Firmicutes	c__Clostridia	o__Oscillospirales	f__Butyricicoccaceae	Butyricicoccaceae	NA	ASV5665_Butyricicoccaceae	2.22121	2.73877	***	Ghana-USA
ASV6820	-2.69839	0.127515	2.17e-99	1.73e-97	k__Bacteria	p__Firmicutes	c__Clostridia	o__Oscillospirales	f__Ruminococcaceae	Ruminococcaceae_UBA1819	NA	ASV6820_Ruminococcaceae_UBA1819	-2.94832	-2.44846	***	Ghana-USA
ASV7374	1.98689	0.171584	5.22e-31	3.28e-30	k__Bacteria	p__Firmicutes	c__Clostridia	o__Lachnospirales	f__Lachnospiraceae	[Eubacterium]_ruminantium	NA	ASV7374_[Eubacterium]_ruminantium	1.65058	2.32319	***	Ghana-USA
ASV7981	-0.707588	0.127643	2.96e-08	5.49e-08	k__Bacteria	p__Firmicutes	c__Clostridia	o__Lachnospirales	f__Lachnospiraceae	Lachnoclostridium	NA	ASV7981_Lachnoclostridium	-0.957769	-0.457408	***	Ghana-USA
ASV8198	1.41248	0.149871	4.32e-21	1.47e-20	k__Bacteria	p__Firmicutes	c__Clostridia	o__Peptostreptococcales-Tissierellales	f__Peptostreptococcaceae	Romboutsia	NA	ASV8198_Romboutsia	1.11873	1.70622	***	Ghana-USA
ASV8565	-2.37095	0.109815	2.21e-103	2.64e-101	k__Bacteria	p__Firmicutes	c__Clostridia	o__Oscillospirales	f__Ruminococcaceae	Ruminococcaceae	NA	ASV8565_Ruminococcaceae	-2.58619	-2.15571	***	Ghana-USA
ASV8650	-2.03815	0.10733	2.08e-80	1.24e-78	k__Bacteria	p__Firmicutes	c__Clostridia	o__Oscillospirales	f__Ruminococcaceae	Ruminococcaceae_DTU089	NA	ASV8650_Ruminococcaceae_DTU089	-2.24852	-1.82779	***	Ghana-USA
ASV884	3.07748	0.193181	3.89e-57	7.15e-56	k__Bacteria	p__Bacteroidota	c__Bacteroidia	o__Bacteroidales	f__Prevotellaceae	Prevotella	NA	ASV884_Prevotella	2.69885	3.45612	***	Ghana-USA
ASV9026	-1.82533	0.128386	7.13e-46	9.47e-45	k__Bacteria	p__Firmicutes	c__Clostridia	o__Oscillospirales	f__Oscillospiraceae	Flavonifractor	NA	ASV9026_Flavonifractor	-2.07697	-1.5737	***	Ghana-USA
ASV9733	2.60691	0.147453	6.02e-70	2.06e-68	k__Bacteria	p__Firmicutes	c__Clostridia	o__Clostridiales	f__Clostridiaceae	Clostridium_ss_1	NA	ASV9733_Clostridium_ss_1	2.3179	2.89592	***	Ghana-USA
ASV10084	2.85765	0.179739	6.45e-57	2.2e-55	k__Bacteria	p__Firmicutes	c__Clostridia	o__Clostridia_UCG-014	f__Clostridia_UCG-014	Clostridia_UCG-014	NA	ASV10084_Clostridia_UCG-014	2.50536	3.20993	***	Jamaica-USA
ASV10349	-1.16202	0.140658	1.44e-16	5.74e-16	k__Bacteria	p__Firmicutes	c__Bacilli	o__Erysipelotrichales	f__Erysipelotrichaceae	[Clostridium]_innocuum	NA	ASV10349_[Clostridium]_innocuum	-1.43771	-0.886334	***	Jamaica-USA
ASV10646	1.94955	0.206961	4.51e-21	2.45e-20	k__Bacteria	p__Firmicutes	c__Negativicutes	o__Veillonellales-Selenomonadales	f__Veillonellaceae	Dialister	NA	ASV10646_Dialister	1.54391	2.35519	***	Jamaica-USA
ASV10945	1.96981	0.158045	1.18e-35	1.76e-34	k__Bacteria	p__Firmicutes	c__Negativicutes	o__Veillonellales-Selenomonadales	f__Veillonellaceae	Veillonella	NA	ASV10945_Veillonella	1.66004	2.27958	***	Jamaica-USA
ASV11120	-1.08522	0.136079	1.52e-15	5.69e-15	k__Bacteria	p__Firmicutes	c__Clostridia	o__Lachnospirales	f__Lachnospiraceae	Anaerostipes	NA	ASV11120_Anaerostipes	-1.35193	-0.818502	***	Jamaica-USA
ASV11364	-1.32492	0.19175	4.86e-12	1.45e-11	k__Bacteria	p__Firmicutes	c__Clostridia	o__Lachnospirales	f__Lachnospiraceae	Sellimonas	NA	ASV11364_Sellimonas	-1.70075	-0.949089	***	Jamaica-USA
ASV11529	-0.694998	0.149503	3.34e-06	6.09e-06	k__Bacteria	p__Firmicutes	c__Clostridia	o__Lachnospirales	f__Lachnospiraceae	Eisenbergiella	NA	ASV11529_Eisenbergiella	-0.988024	-0.401971	***	Jamaica-USA
ASV165	1.71184	0.172281	2.89e-23	1.77e-22	k__Bacteria	p__Proteobacteria	c__Gammaproteobacteria	o__Pasteurellales	f__Pasteurellaceae	Haemophilus	NA	ASV165_Haemophilus	1.37417	2.04951	***	Jamaica-USA
ASV1716	1.40787	0.157175	3.33e-19	1.62e-18	k__Bacteria	p__Bacteroidota	c__Bacteroidia	o__Bacteroidales	f__Rikenellaceae	Alistipes	NA	ASV1716_Alistipes	1.09981	1.71594	***	Jamaica-USA
ASV1853	0.938525	0.147234	1.84e-10	4.77e-10	k__Bacteria	p__Bacteroidota	c__Bacteroidia	o__Bacteroidales	f__Tannerellaceae	Parabacteroides	NA	ASV1853_Parabacteroides	0.649947	1.2271	***	Jamaica-USA
ASV227	3.38559	0.16288	5.81e-96	6.95e-94	k__Bacteria	p__Proteobacteria	c__Gammaproteobacteria	o__Enterobacterales	f__Enterobacteriaceae	Enterobacteriaceae	NA	ASV227_Enterobacteriaceae	3.06635	3.70484	***	Jamaica-USA
ASV2718	2.92466	0.161419	2.28e-73	1.36e-71	k__Bacteria	p__Firmicutes	c__Bacilli	o__RF39	f__RF39	Bacilli_RF39	NA	ASV2718_Bacilli_RF39	2.60827	3.24104	***	Jamaica-USA
ASV3067	0.251393	0.119121	0.0348234	0.044036	k__Bacteria	p__Firmicutes	c__Bacilli	o__Lactobacillales	f__Leuconostocaceae	Weissella	NA	ASV3067_Weissella	0.0179164	0.484869	*	Jamaica-USA
ASV3652	-0.844621	0.12391	9.34e-12	2.69e-11	k__Bacteria	p__Firmicutes	c__Clostridia	o__Peptostreptococcales-Tissierellales	f__Anaerovoracaceae	[Eubacterium]_brachy	NA	ASV3652_[Eubacterium]_brachy	-1.08749	-0.601756	***	Jamaica-USA
ASV3819	-1.02432	0.176535	6.54e-09	1.43e-08	k__Bacteria	p__Firmicutes	c__Clostridia	o__Peptostreptococcales-Tissierellales	f__Anaerovoracaceae	Mogibacterium	NA	ASV3819_Mogibacterium	-1.37032	-0.678308	***	Jamaica-USA
ASV4633	2.22722	0.154113	2.44e-47	6.48e-46	k__Bacteria	p__Firmicutes	c__Clostridia	o__Oscillospirales	f__Oscillospiraceae	Oscillospiraceae_UCG-002	NA	ASV4633_Oscillospiraceae_UCG-002	1.92515	2.52928	***	Jamaica-USA
ASV5363	1.14998	0.151922	3.75e-14	1.28e-13	k__Bacteria	p__Actinobacteriota	c__Coriobacteriia	o__Coriobacteriales	f__Atopobiaceae	Olsenella	NA	ASV5363_Olsenella	0.852212	1.44775	***	Jamaica-USA
ASV5405	-1.25278	0.141658	9.26e-19	4.34e-18	k__Bacteria	p__Actinobacteriota	c__Coriobacteriia	o__Coriobacteriales	f__Eggerthellaceae	Adlercreutzia	NA	ASV5405_Adlercreutzia	-1.53043	-0.975132	***	Jamaica-USA
ASV551	1.73479	0.158341	6.22e-28	4.95e-27	k__Bacteria	p__Bacteroidota	c__Bacteroidia	o__Bacteroidales	f__Bacteroidaceae	Bacteroides	NA	ASV551_Bacteroides	1.42444	2.04514	***	Jamaica-USA
ASV5519	-0.894189	0.171395	1.82e-07	3.62e-07	k__Bacteria	p__Actinobacteriota	c__Coriobacteriia	o__Coriobacteriales	f__Eggerthellaceae	Eggerthella	NA	ASV5519_Eggerthella	-1.23012	-0.558255	***	Jamaica-USA
ASV5665	-0.274851	0.0825819	0.000874015	0.00130556	k__Bacteria	p__Firmicutes	c__Clostridia	o__Oscillospirales	f__Butyricicoccaceae	Butyricicoccaceae	NA	ASV5665_Butyricicoccaceae	-0.436712	-0.112991	**	Jamaica-USA
ASV6820	0.407882	0.13113	0.00186755	0.00267272	k__Bacteria	p__Firmicutes	c__Clostridia	o__Oscillospirales	f__Ruminococcaceae	Ruminococcaceae_UBA1819	NA	ASV6820_Ruminococcaceae_UBA1819	0.150868	0.664896	**	Jamaica-USA
ASV7374	1.46304	0.153579	1.63e-21	9.06e-21	k__Bacteria	p__Firmicutes	c__Clostridia	o__Lachnospirales	f__Lachnospiraceae	[Eubacterium]_ruminantium	NA	ASV7374_[Eubacterium]_ruminantium	1.16203	1.76406	***	Jamaica-USA
ASV7981	0.513798	0.12936	7.13e-05	0.000117552	k__Bacteria	p__Firmicutes	c__Clostridia	o__Lachnospirales	f__Lachnospiraceae	Lachnoclostridium	NA	ASV7981_Lachnoclostridium	0.260252	0.767344	***	Jamaica-USA
ASV8198	0.601166	0.153504	8.99e-05	0.000145218	k__Bacteria	p__Firmicutes	c__Clostridia	o__Peptostreptococcales-Tissierellales	f__Peptostreptococcaceae	Romboutsia	NA	ASV8198_Romboutsia	0.300297	0.902035	***	Jamaica-USA
ASV8565	-1.06068	0.102753	5.57e-25	3.6e-24	k__Bacteria	p__Firmicutes	c__Clostridia	o__Oscillospirales	f__Ruminococcaceae	Ruminococcaceae	NA	ASV8565_Ruminococcaceae	-1.26207	-0.859282	***	Jamaica-USA
ASV8650	-0.564946	0.130436	1.48e-05	2.55e-05	k__Bacteria	p__Firmicutes	c__Clostridia	o__Oscillospirales	f__Ruminococcaceae	Ruminococcaceae_DTU089	NA	ASV8650_Ruminococcaceae_DTU089	-0.820601	-0.309292	***	Jamaica-USA
ASV884	2.09741	0.180691	3.76e-31	4.28e-30	k__Bacteria	p__Bacteroidota	c__Bacteroidia	o__Bacteroidales	f__Prevotellaceae	Prevotella	NA	ASV884_Prevotella	1.74326	2.45157	***	Jamaica-USA
ASV9026	0.618744	0.14298	1.51e-05	2.57e-05	k__Bacteria	p__Firmicutes	c__Clostridia	o__Oscillospirales	f__Oscillospiraceae	Flavonifractor	NA	ASV9026_Flavonifractor	0.338503	0.898985	***	Jamaica-USA
ASV9733	1.45284	0.133239	1.1e-27	8.5e-27	k__Bacteria	p__Firmicutes	c__Clostridia	o__Clostridiales	f__Clostridiaceae	Clostridium_ss_1	NA	ASV9733_Clostridium_ss_1	1.1917	1.71399	***	Jamaica-USA
ASV10084	2.11931	0.194068	9.2e-28	1.16e-26	k__Bacteria	p__Firmicutes	c__Clostridia	o__Clostridia_UCG-014	f__Clostridia_UCG-014	Clostridia_UCG-014	NA	ASV10084_Clostridia_UCG-014	1.73894	2.49969	***	South Africa-USA
ASV10349	-0.672447	0.151234	8.73e-06	1.75e-05	k__Bacteria	p__Firmicutes	c__Bacilli	o__Erysipelotrichales	f__Erysipelotrichaceae	[Clostridium]_innocuum	NA	ASV10349_[Clostridium]_innocuum	-0.968866	-0.376028	***	South Africa-USA
ASV10646	0.750489	0.207519	0.000298638	0.000479024	k__Bacteria	p__Firmicutes	c__Negativicutes	o__Veillonellales-Selenomonadales	f__Veillonellaceae	Dialister	NA	ASV10646_Dialister	0.343751	1.15723	***	South Africa-USA
ASV10945	0.647563	0.158021	4.17e-05	7.66e-05	k__Bacteria	p__Firmicutes	c__Negativicutes	o__Veillonellales-Selenomonadales	f__Veillonellaceae	Veillonella	NA	ASV10945_Veillonella	0.337842	0.957283	***	South Africa-USA
ASV11120	-0.599648	0.13318	6.71e-06	1.36e-05	k__Bacteria	p__Firmicutes	c__Clostridia	o__Lachnospirales	f__Lachnospiraceae	Anaerostipes	NA	ASV11120_Anaerostipes	-0.860681	-0.338615	***	South Africa-USA
ASV11364	-0.843557	0.187039	6.48e-06	1.34e-05	k__Bacteria	p__Firmicutes	c__Clostridia	o__Lachnospirales	f__Lachnospiraceae	Sellimonas	NA	ASV11364_Sellimonas	-1.21015	-0.476961	***	South Africa-USA
ASV11529	-1.47266	0.145868	5.76e-24	5.99e-23	k__Bacteria	p__Firmicutes	c__Clostridia	o__Lachnospirales	f__Lachnospiraceae	Eisenbergiella	NA	ASV11529_Eisenbergiella	-1.75857	-1.18676	***	South Africa-USA
ASV165	0.98856	0.179806	3.84e-08	9.67e-08	k__Bacteria	p__Proteobacteria	c__Gammaproteobacteria	o__Pasteurellales	f__Pasteurellaceae	Haemophilus	NA	ASV165_Haemophilus	0.636141	1.34098	***	South Africa-USA
ASV1716	-1.4537	0.1576	2.86e-20	2.14e-19	k__Bacteria	p__Bacteroidota	c__Bacteroidia	o__Bacteroidales	f__Rikenellaceae	Alistipes	NA	ASV1716_Alistipes	-1.7626	-1.14481	***	South Africa-USA
ASV1853	-1.04433	0.151967	6.33e-12	2.39e-11	k__Bacteria	p__Bacteroidota	c__Bacteroidia	o__Bacteroidales	f__Tannerellaceae	Parabacteroides	NA	ASV1853_Parabacteroides	-1.34218	-0.746471	***	South Africa-USA
ASV227	0.909704	0.17581	2.29e-07	5.41e-07	k__Bacteria	p__Proteobacteria	c__Gammaproteobacteria	o__Enterobacterales	f__Enterobacteriaceae	Enterobacteriaceae	NA	ASV227_Enterobacteriaceae	0.565116	1.25429	***	South Africa-USA
ASV2718	2.34637	0.166111	2.65e-45	9.05e-44	k__Bacteria	p__Firmicutes	c__Bacilli	o__RF39	f__RF39	Bacilli_RF39	NA	ASV2718_Bacilli_RF39	2.02079	2.67194	***	South Africa-USA
ASV3067	0.798883	0.144624	3.32e-08	8.43e-08	k__Bacteria	p__Firmicutes	c__Bacilli	o__Lactobacillales	f__Leuconostocaceae	Weissella	NA	ASV3067_Weissella	0.51542	1.08235	***	South Africa-USA
ASV3652	-1.31437	0.130956	1.05e-23	1.05e-22	k__Bacteria	p__Firmicutes	c__Clostridia	o__Peptostreptococcales-Tissierellales	f__Anaerovoracaceae	[Eubacterium]_brachy	NA	ASV3652_[Eubacterium]_brachy	-1.57104	-1.0577	***	South Africa-USA
ASV3819	2.33027	0.1989	1.06e-31	1.58e-30	k__Bacteria	p__Firmicutes	c__Clostridia	o__Peptostreptococcales-Tissierellales	f__Anaerovoracaceae	Mogibacterium	NA	ASV3819_Mogibacterium	1.94042	2.72011	***	South Africa-USA
ASV4633	1.1239	0.1607	2.68e-12	1.05e-11	k__Bacteria	p__Firmicutes	c__Clostridia	o__Oscillospirales	f__Oscillospiraceae	Oscillospiraceae_UCG-002	NA	ASV4633_Oscillospiraceae_UCG-002	0.808929	1.43887	***	South Africa-USA
ASV5363	2.95542	0.141775	1.66e-96	3.97e-94	k__Bacteria	p__Actinobacteriota	c__Coriobacteriia	o__Coriobacteriales	f__Atopobiaceae	Olsenella	NA	ASV5363_Olsenella	2.67754	3.2333	***	South Africa-USA
ASV5405	-1.64416	0.137923	9.21e-33	1.57e-31	k__Bacteria	p__Actinobacteriota	c__Coriobacteriia	o__Coriobacteriales	f__Eggerthellaceae	Adlercreutzia	NA	ASV5405_Adlercreutzia	-1.91449	-1.37383	***	South Africa-USA
ASV551	-1.06066	0.165225	1.37e-10	4.6e-10	k__Bacteria	p__Bacteroidota	c__Bacteroidia	o__Bacteroidales	f__Bacteroidaceae	Bacteroides	NA	ASV551_Bacteroides	-1.38451	-0.736824	***	South Africa-USA
ASV5519	-1.15966	0.168784	6.39e-12	2.39e-11	k__Bacteria	p__Actinobacteriota	c__Coriobacteriia	o__Coriobacteriales	f__Eggerthellaceae	Eggerthella	NA	ASV5519_Eggerthella	-1.49048	-0.828844	***	South Africa-USA
ASV5665	0.418639	0.118209	0.000397835	0.000629686	k__Bacteria	p__Firmicutes	c__Clostridia	o__Oscillospirales	f__Butyricicoccaceae	Butyricicoccaceae	NA	ASV5665_Butyricicoccaceae	0.186949	0.650329	***	South Africa-USA
ASV6820	-1.11506	0.136928	3.84e-16	2.02e-15	k__Bacteria	p__Firmicutes	c__Clostridia	o__Oscillospirales	f__Ruminococcaceae	Ruminococcaceae_UBA1819	NA	ASV6820_Ruminococcaceae_UBA1819	-1.38344	-0.846684	***	South Africa-USA
ASV7374	0.991283	0.165946	2.32e-09	6.94e-09	k__Bacteria	p__Firmicutes	c__Clostridia	o__Lachnospirales	f__Lachnospiraceae	[Eubacterium]_ruminantium	NA	ASV7374_[Eubacterium]_ruminantium	0.666029	1.31654	***	South Africa-USA
ASV7981	-0.487976	0.133605	0.000259821	0.000419576	k__Bacteria	p__Firmicutes	c__Clostridia	o__Lachnospirales	f__Lachnospiraceae	Lachnoclostridium	NA	ASV7981_Lachnoclostridium	-0.749842	-0.226111	***	South Africa-USA
ASV8198	1.49012	0.153199	2.32e-22	2.05e-21	k__Bacteria	p__Firmicutes	c__Clostridia	o__Peptostreptococcales-Tissierellales	f__Peptostreptococcaceae	Romboutsia	NA	ASV8198_Romboutsia	1.18985	1.79039	***	South Africa-USA
ASV8565	-1.30474	0.110577	3.93e-32	6.26e-31	k__Bacteria	p__Firmicutes	c__Clostridia	o__Oscillospirales	f__Ruminococcaceae	Ruminococcaceae	NA	ASV8565_Ruminococcaceae	-1.52148	-1.08801	***	South Africa-USA
ASV8650	-1.56723	0.11888	1.09e-39	2.38e-38	k__Bacteria	p__Firmicutes	c__Clostridia	o__Oscillospirales	f__Ruminococcaceae	Ruminococcaceae_DTU089	NA	ASV8650_Ruminococcaceae_DTU089	-1.80023	-1.33422	***	South Africa-USA
ASV884	1.72331	0.179362	7.4e-22	6.31e-21	k__Bacteria	p__Bacteroidota	c__Bacteroidia	o__Bacteroidales	f__Prevotellaceae	Prevotella	NA	ASV884_Prevotella	1.37176	2.07486	***	South Africa-USA
ASV9026	-0.795417	0.135675	4.56e-09	1.34e-08	k__Bacteria	p__Firmicutes	c__Clostridia	o__Oscillospirales	f__Oscillospiraceae	Flavonifractor	NA	ASV9026_Flavonifractor	-1.06134	-0.529494	***	South Africa-USA
ASV9733	2.59012	0.141242	4.11e-75	3.27e-73	k__Bacteria	p__Firmicutes	c__Clostridia	o__Clostridiales	f__Clostridiaceae	Clostridium_ss_1	NA	ASV9733_Clostridium_ss_1	2.31328	2.86695	***	South Africa-USA
ASV10084	0.722667	0.191735	0.000163844	0.000380181	k__Bacteria	p__Firmicutes	c__Clostridia	o__Clostridia_UCG-014	f__Clostridia_UCG-014	Clostridia_UCG-014	NA	ASV10084_Clostridia_UCG-014	0.346866	1.09847	***	Seychelles-USA
ASV10349	-1.7507	0.128189	1.83e-42	1.46e-40	k__Bacteria	p__Firmicutes	c__Bacilli	o__Erysipelotrichales	f__Erysipelotrichaceae	[Clostridium]_innocuum	NA	ASV10349_[Clostridium]_innocuum	-2.00195	-1.49945	***	Seychelles-USA
ASV10646	-0.589578	0.206707	0.00434133	0.00804323	k__Bacteria	p__Firmicutes	c__Negativicutes	o__Veillonellales-Selenomonadales	f__Veillonellaceae	Dialister	NA	ASV10646_Dialister	-0.994724	-0.184431	**	Seychelles-USA
ASV10945	0.737092	0.144902	3.64e-07	1.28e-06	k__Bacteria	p__Firmicutes	c__Negativicutes	o__Veillonellales-Selenomonadales	f__Veillonellaceae	Veillonella	NA	ASV10945_Veillonella	0.453083	1.0211	***	Seychelles-USA
ASV11120	-1.53422	0.143081	7.96e-27	2e-25	k__Bacteria	p__Firmicutes	c__Clostridia	o__Lachnospirales	f__Lachnospiraceae	Anaerostipes	NA	ASV11120_Anaerostipes	-1.81466	-1.25378	***	Seychelles-USA
ASV11364	-1.46066	0.176949	1.52e-16	1.35e-15	k__Bacteria	p__Firmicutes	c__Clostridia	o__Lachnospirales	f__Lachnospiraceae	Sellimonas	NA	ASV11364_Sellimonas	-1.80748	-1.11384	***	Seychelles-USA
ASV11529	-1.84504	0.129766	7.07e-46	8.44e-44	k__Bacteria	p__Firmicutes	c__Clostridia	o__Lachnospirales	f__Lachnospiraceae	Eisenbergiella	NA	ASV11529_Eisenbergiella	-2.09938	-1.5907	***	Seychelles-USA
ASV165	1.52455	0.166885	6.52e-20	7.42e-19	k__Bacteria	p__Proteobacteria	c__Gammaproteobacteria	o__Pasteurellales	f__Pasteurellaceae	Haemophilus	NA	ASV165_Haemophilus	1.19745	1.85164	***	Seychelles-USA
ASV1716	-1.20709	0.152143	2.12e-15	1.69e-14	k__Bacteria	p__Bacteroidota	c__Bacteroidia	o__Bacteroidales	f__Rikenellaceae	Alistipes	NA	ASV1716_Alistipes	-1.50529	-0.908885	***	Seychelles-USA
ASV1853	-1.40769	0.145467	3.77e-22	5.64e-21	k__Bacteria	p__Bacteroidota	c__Bacteroidia	o__Bacteroidales	f__Tannerellaceae	Parabacteroides	NA	ASV1853_Parabacteroides	-1.6928	-1.12257	***	Seychelles-USA
ASV227	0.717123	0.177288	5.23e-05	0.000128939	k__Bacteria	p__Proteobacteria	c__Gammaproteobacteria	o__Enterobacterales	f__Enterobacteriaceae	Enterobacteriaceae	NA	ASV227_Enterobacteriaceae	0.369639	1.06461	***	Seychelles-USA
ASV2718	0.822685	0.133659	7.5e-10	3.32e-09	k__Bacteria	p__Firmicutes	c__Bacilli	o__RF39	f__RF39	Bacilli_RF39	NA	ASV2718_Bacilli_RF39	0.560712	1.08466	***	Seychelles-USA
ASV3067	1.0404	0.161478	1.17e-10	5.38e-10	k__Bacteria	p__Firmicutes	c__Bacilli	o__Lactobacillales	f__Leuconostocaceae	Weissella	NA	ASV3067_Weissella	0.7239	1.35689	***	Seychelles-USA
ASV3652	-0.959392	0.126985	4.18e-14	2.7e-13	k__Bacteria	p__Firmicutes	c__Clostridia	o__Peptostreptococcales-Tissierellales	f__Anaerovoracaceae	[Eubacterium]_brachy	NA	ASV3652_[Eubacterium]_brachy	-1.20828	-0.710502	***	Seychelles-USA
ASV3819	-0.736646	0.193386	0.000139413	0.000329899	k__Bacteria	p__Firmicutes	c__Clostridia	o__Peptostreptococcales-Tissierellales	f__Anaerovoracaceae	Mogibacterium	NA	ASV3819_Mogibacterium	-1.11568	-0.35761	***	Seychelles-USA
ASV4633	-0.518038	0.168538	0.00211408	0.00421055	k__Bacteria	p__Firmicutes	c__Clostridia	o__Oscillospirales	f__Oscillospiraceae	Oscillospiraceae_UCG-002	NA	ASV4633_Oscillospiraceae_UCG-002	-0.848371	-0.187704	**	Seychelles-USA
ASV5363	1.98887	0.146326	4.46e-42	2.67e-40	k__Bacteria	p__Actinobacteriota	c__Coriobacteriia	o__Coriobacteriales	f__Atopobiaceae	Olsenella	NA	ASV5363_Olsenella	1.70207	2.27567	***	Seychelles-USA
ASV5405	-1.15798	0.140557	1.74e-16	1.49e-15	k__Bacteria	p__Actinobacteriota	c__Coriobacteriia	o__Coriobacteriales	f__Eggerthellaceae	Adlercreutzia	NA	ASV5405_Adlercreutzia	-1.43347	-0.882491	***	Seychelles-USA
ASV551	-1.53561	0.169486	1.3e-19	1.35e-18	k__Bacteria	p__Bacteroidota	c__Bacteroidia	o__Bacteroidales	f__Bacteroidaceae	Bacteroides	NA	ASV551_Bacteroides	-1.8678	-1.20342	***	Seychelles-USA
ASV5519	-1.53941	0.162602	2.87e-21	3.61e-20	k__Bacteria	p__Actinobacteriota	c__Coriobacteriia	o__Coriobacteriales	f__Eggerthellaceae	Eggerthella	NA	ASV5519_Eggerthella	-1.85811	-1.22071	***	Seychelles-USA
ASV5665	0.212998	0.0830332	0.0103111	0.0182545	k__Bacteria	p__Firmicutes	c__Clostridia	o__Oscillospirales	f__Butyricicoccaceae	Butyricicoccaceae	NA	ASV5665_Butyricicoccaceae	0.0502532	0.375743	*	Seychelles-USA
ASV6820	-1.62161	0.122714	7.23e-40	3.46e-38	k__Bacteria	p__Firmicutes	c__Clostridia	o__Oscillospirales	f__Ruminococcaceae	Ruminococcaceae_UBA1819	NA	ASV6820_Ruminococcaceae_UBA1819	-1.86212	-1.38109	***	Seychelles-USA
ASV7374	0.502072	0.155457	0.00123942	0.00262143	k__Bacteria	p__Firmicutes	c__Clostridia	o__Lachnospirales	f__Lachnospiraceae	[Eubacterium]_ruminantium	NA	ASV7374_[Eubacterium]_ruminantium	0.197376	0.806768	**	Seychelles-USA
ASV7981	-1.55226	0.144829	8.39e-27	2e-25	k__Bacteria	p__Firmicutes	c__Clostridia	o__Lachnospirales	f__Lachnospiraceae	Lachnoclostridium	NA	ASV7981_Lachnoclostridium	-1.83613	-1.2684	***	Seychelles-USA
ASV8198	0.759134	0.158844	1.76e-06	5.33e-06	k__Bacteria	p__Firmicutes	c__Clostridia	o__Peptostreptococcales-Tissierellales	f__Peptostreptococcaceae	Romboutsia	NA	ASV8198_Romboutsia	0.4478	1.07047	***	Seychelles-USA
ASV8565	-2.12672	0.115697	1.84e-75	4.4e-73	k__Bacteria	p__Firmicutes	c__Clostridia	o__Oscillospirales	f__Ruminococcaceae	Ruminococcaceae	NA	ASV8565_Ruminococcaceae	-2.35348	-1.89995	***	Seychelles-USA
ASV8650	-1.31955	0.107887	2.13e-34	8.48e-33	k__Bacteria	p__Firmicutes	c__Clostridia	o__Oscillospirales	f__Ruminococcaceae	Ruminococcaceae_DTU089	NA	ASV8650_Ruminococcaceae_DTU089	-1.53101	-1.10809	***	Seychelles-USA
ASV884	0.522911	0.16719	0.0017621	0.00363053	k__Bacteria	p__Bacteroidota	c__Bacteroidia	o__Bacteroidales	f__Prevotellaceae	Prevotella	NA	ASV884_Prevotella	0.195219	0.850603	**	Seychelles-USA
ASV9026	-1.24061	0.12438	1.97e-23	3.37e-22	k__Bacteria	p__Firmicutes	c__Clostridia	o__Oscillospirales	f__Oscillospiraceae	Flavonifractor	NA	ASV9026_Flavonifractor	-1.4844	-0.996825	***	Seychelles-USA
ASV9733	0.966826	0.153424	2.94e-10	1.33e-09	k__Bacteria	p__Firmicutes	c__Clostridia	o__Clostridiales	f__Clostridiaceae	Clostridium_ss_1	NA	ASV9733_Clostridium_ss_1	0.666115	1.26754	***	Seychelles-USA
Fig. 2b
asv	log_fold_change	se	p_val	q_val	Kingdom	Phylum	Class	Order	Family	Genus	Species	Taxa	ci_low	ci_up	star	type
ASV10349	-0.293727	0.0892086	0.000993	0.0103156	Bacteria	Firmicutes	Bacilli	Erysipelotrichales	Erysipelotrichaceae	[Clostridium]_innocuum_group	NA	ASV10349_[Clostridium]	-0.468576	-0.118878	*	non-Obese - Obese
ASV10357	-0.17489	0.06542	0.00750985	0.0485096	Bacteria	Firmicutes	Bacilli	Erysipelotrichales	Erysipelotrichaceae	Dielma	NA	ASV10357_Dielma	-0.303113	-0.0466671	*	non-Obese - Obese
ASV10394	0.22951	0.0795108	0.00389521	0.0290923	Bacteria	Firmicutes	Bacilli	Erysipelotrichales	Erysipelotrichaceae	Erysipelotrichaceae_UCG-006	NA	ASV10394_Erysipelotrichaceae_UCG-006	0.0736688	0.385351	*	non-Obese - Obese
ASV10646	0.402596	0.135494	0.00296527	0.0253107	Bacteria	Firmicutes	Negativicutes	Veillonellales-Selenomonadales	Veillonellaceae	Dialister	NA	ASV10646_Dialister	0.137027	0.668164	*	non-Obese - Obese
ASV10700	0.28075	0.0934189	0.00265338	0.0234873	Bacteria	Firmicutes	Negativicutes	Veillonellales-Selenomonadales	Veillonellaceae	Allisonella	NA	ASV10700_Allisonella	0.0976488	0.463851	*	non-Obese - Obese
ASV10805	0.327234	0.0960695	0.000659	0.00773346	Bacteria	Firmicutes	Negativicutes	Veillonellales-Selenomonadales	Selenomonadaceae	Mitsuokella	NA	ASV10805_Mitsuokella	0.138938	0.515531	**	non-Obese - Obese
ASV11529	-0.326924	0.089712	0.000268	0.00493222	Bacteria	Firmicutes	Clostridia	Lachnospirales	Lachnospiraceae	Eisenbergiella	NA	ASV11529_Eisenbergiella	-0.502759	-0.151088	**	non-Obese - Obese
ASV11827	0.327294	0.0836327	9.1e-05	0.00241598	Bacteria	Firmicutes	Clostridia	Lachnospirales	Lachnospiraceae	Oribacterium	NA	ASV11827_Oribacterium	0.163374	0.491214	**	non-Obese - Obese
ASV11840	-0.222092	0.0783741	0.00460056	0.0323392	Bacteria	Firmicutes	Clostridia	Lachnospirales	Lachnospiraceae	[Eubacterium]_fissicatena_group	NA	ASV11840_[Eubacterium]	-0.375706	-0.0684792	*	non-Obese - Obese
ASV1716	-0.478765	0.102762	3.18e-06	0.00038	Bacteria	Bacteroidota	Bacteroidia	Bacteroidales	Rikenellaceae	Alistipes	NA	ASV1716_Alistipes	-0.680179	-0.277351	***	non-Obese - Obese
ASV1762	-0.220462	0.0691144	0.00142364	0.01361	Bacteria	Bacteroidota	Bacteroidia	Bacteroidales	Marinifilaceae	Odoribacter	NA	ASV1762_Odoribacter	-0.355926	-0.0849978	*	non-Obese - Obese
ASV1853	-0.436505	0.0961745	5.66e-06	0.000435	Bacteria	Bacteroidota	Bacteroidia	Bacteroidales	Tannerellaceae	Parabacteroides	NA	ASV1853_Parabacteroides	-0.625007	-0.248003	***	non-Obese - Obese
ASV2465	-0.253241	0.0710144	0.000362	0.00618682	Bacteria	Synergistota	Synergistia	Synergistales	Synergistaceae	Cloacibacillus	NA	ASV2465_Cloacibacillus	-0.392429	-0.114052	**	non-Obese - Obese
ASV3904	-0.309327	0.0882187	0.000454	0.00638656	Bacteria	Firmicutes	Clostridia	Eubacteriales	Eubacteriaceae	Eubacterium	NA	ASV3904_Eubacterium	-0.482235	-0.136418	**	non-Obese - Obese
ASV3912	-0.208063	0.0588881	0.000411	0.00621353	Bacteria	Firmicutes	Clostridia	Eubacteriales	Anaerofustaceae	Anaerofustis	NA	ASV3912_Anaerofustis	-0.323484	-0.0926421	**	non-Obese - Obese
ASV4072	-0.275626	0.0671843	4.09e-05	0.00139524	Bacteria	Firmicutes	Clostridia	Christensenellales	Christensenellaceae	Christensenellaceae Family	NA	ASV4072_Christensenellaceae	-0.407307	-0.143945	**	non-Obese - Obese
ASV4440	-0.17167	0.0505252	0.00068	0.00773346	Bacteria	Firmicutes	Clostridia	Oscillospirales	Oscillospiraceae	UCG-007	NA	ASV4440_Oscillospiraceae_UCG-007	-0.270699	-0.0726408	**	non-Obese - Obese
ASV4454	-0.209755	0.0487014	1.66e-05	0.000791	Bacteria	Firmicutes	Clostridia	Oscillospirales	Oscillospiraceae	Papillibacter	NA	ASV4454_Papillibacter	-0.30521	-0.1143	***	non-Obese - Obese
ASV4953	-0.238621	0.0642366	0.000203	0.00442003	Bacteria	Firmicutes	Clostridia	Oscillospirales	Oscillospirales Order	Oscillospirales Order	NA	ASV4953_Oscillospirales	-0.364524	-0.112717	**	non-Obese - Obese
ASV5343	0.30664	0.109904	0.00526949	0.0359831	Bacteria	Actinobacteriota	Coriobacteriia	Coriobacteriales	Atopobiaceae	Libanicoccus	NA	ASV5343_Libanicoccus	0.0912288	0.52205	*	non-Obese - Obese
ASV551	-0.427562	0.107265	6.72e-05	0.00200721	Bacteria	Bacteroidota	Bacteroidia	Bacteroidales	Bacteroidaceae	Bacteroides	NA	ASV551_Bacteroides	-0.637802	-0.217323	**	non-Obese - Obese
ASV5519	-0.296403	0.111296	0.00774034	0.0486826	Bacteria	Actinobacteriota	Coriobacteriia	Coriobacteriales	Eggerthellaceae	Eggerthella	NA	ASV5519_Eggerthella	-0.514544	-0.0782625	*	non-Obese - Obese
ASV5533	-0.185004	0.0531545	0.0005	0.00664518	Bacteria	Actinobacteriota	Coriobacteriia	Coriobacteriales	Coriobacteriales_Incertae_Sedis	Raoultibacter	NA	ASV5533_Raoultibacter	-0.289187	-0.0808215	**	non-Obese - Obese
ASV5929	-0.163955	0.0560577	0.00344735	0.0277394	Bacteria	Firmicutes	Clostridia	Oscillospirales	[Clostridium]_methylpentosum_group	[Clostridium]_methylpentosum_group	NA	ASV5929_[Clostridium]	-0.273828	-0.0540816	*	non-Obese - Obese
ASV6169	-0.198572	0.0601843	0.000969	0.0103156	Bacteria	Firmicutes	Clostridia	Oscillospirales	Ruminococcaceae	Anaerotruncus	NA	ASV6169_Anaerotruncus	-0.316534	-0.0806112	*	non-Obese - Obese
ASV6208	-0.308494	0.0965979	0.00140516	0.01361	Bacteria	Firmicutes	Clostridia	Oscillospirales	Ruminococcaceae	[Eubacterium]_siraeum_group	NA	ASV6208_[Eubacterium]	-0.497826	-0.119162	*	non-Obese - Obese
ASV6437	0.281879	0.0967029	0.00355811	0.0277394	Bacteria	Firmicutes	Clostridia	Lachnospirales	Lachnospiraceae	Lachnospira	NA	ASV6437_Lachnospira	0.092341	0.471416	*	non-Obese - Obese
ASV6820	-0.436746	0.0846281	2.46e-07	5.88e-05	Bacteria	Firmicutes	Clostridia	Oscillospirales	Ruminococcaceae	UBA1819	NA	ASV6820_Ruminococcaceae_UBA1819	-0.602617	-0.270875	***	non-Obese - Obese
ASV7018	-0.278506	0.0789028	0.000416	0.00621353	Bacteria	Firmicutes	Clostridia	Oscillospirales	Ruminococcaceae	Fournierella	NA	ASV7018_Fournierella	-0.433156	-0.123857	**	non-Obese - Obese
ASV7151	-0.262538	0.0585355	7.29e-06	0.000435	Bacteria	Firmicutes	Clostridia	Clostridia Class	Clostridia Class	Clostridia	NA	ASV7151_Clostridia	-0.377268	-0.147809	***	non-Obese - Obese
ASV7225	-0.206525	0.0541136	0.000135	0.00323499	Bacteria	Firmicutes	Clostridia	Christensenellales	Christensenellaceae	Christensenella	NA	ASV7225_Christensenella	-0.312587	-0.100462	**	non-Obese - Obese
ASV7679	-0.285073	0.0995887	0.00420304	0.0304402	Bacteria	Firmicutes	Clostridia	Lachnospirales	Lachnospiraceae	Hungatella	NA	ASV7679_Hungatella	-0.480267	-0.0898795	*	non-Obese - Obese
ASV7920	0.247387	0.0808743	0.00222144	0.0204202	Bacteria	Firmicutes	Clostridia	Lachnospirales	Lachnospiraceae	Lachnospiraceae_NK3A20_group	NA	ASV7920_Lachnospiraceae_NK3A20	0.0888735	0.405901	*	non-Obese - Obese
ASV8565	-0.245346	0.0667513	0.000237	0.0047274	Bacteria	Firmicutes	Clostridia	Oscillospirales	Ruminococcaceae	Incertae_Sedis	NA	ASV8565_Ruminococcaceae	-0.376179	-0.114514	**	non-Obese - Obese
ASV8650	-0.215417	0.0739905	0.003598	0.0277394	Bacteria	Firmicutes	Clostridia	Oscillospirales	Ruminococcaceae	DTU089	NA	ASV8650_Ruminococcaceae_DTU089	-0.360438	-0.0703954	*	non-Obese - Obese
ASV8819	-0.369474	0.106978	0.000553	0.00695472	Bacteria	Firmicutes	Clostridia	Oscillospirales	UCG-010	UCG-010	NA	ASV8819_Oscillospirales_UCG-010	-0.579151	-0.159797	**	non-Obese - Obese
ASV8996	-0.294114	0.0712897	3.7e-05	0.00139524	Bacteria	Firmicutes	Clostridia	Oscillospirales	Oscillospiraceae	Intestinimonas	NA	ASV8996_Intestinimonas	-0.433842	-0.154386	**	non-Obese - Obese
ASV9102	-0.234045	0.0847758	0.0057668	0.0382851	Bacteria	Firmicutes	Clostridia	Oscillospirales	Oscillospiraceae	Colidextribacter	NA	ASV9102_Colidextribacter	-0.400206	-0.0678847	*	non-Obese - Obese

## Sheet: Fig.4
Data for correlations between Shannon diversity (n = 1764) and concentrations of the different types of fecal short chain fatty acids (SCFA) among countries (n=1704)
data for Fig. 4
country	Propionate	Butyrate	Valerate	Acetate	Total SCFA	Shannon
USA	798.95	471.83	70.52	1651.73	2993.03	3.03821
USA	1192.69	1043.66	165.55	3501.03	5902.94	3.66726
USA	531.02	909.24	88.83	1062.74	2591.82	3.32894
USA	482.63	405.97	96.67	988.76	1974.02	2.93871
USA	317.17	150.45	98.76	1101.35	1667.73	4.33238
USA	471.15	339	91.1	1153.6	2054.85	3.90067
USA	389.81	437.91	211.98	894.33	1934.03	3.6287
USA	233.62	211.33	53.18	396.6	894.73	4.22659
USA	1135.22	1176.99	275.71	1278.05	3865.97	4.01925
USA	1039.67	1895.63	363.37	1513.28	4811.94	3.05522
USA	1147.5	707.52	27.05	2421.9	4303.97	2.91862
USA	3129.17	1310.21	186.42	2807.81	7433.61	3.67245
USA	1293.62	1486.3	129.06	2000.23	4909.21	3.4328
USA	558.93	532.62	80.78	1117.57	2289.91	3.50675
USA	1218.25	1495.67	81.6	3038.63	5834.15	2.76225
USA	531.39	870.32	328.46	995.62	2725.78	4.13749
USA	556.15	371.52	84.01	749.45	1761.13	3.94994
USA	619.68	1106.66	209.57	1724.99	3660.91	3.09584
USA	759.46	566.07	122.74	895.23	2343.52	3.31556
USA	1885.26	2061.83	446.18	1902.84	6296.11	3.29923
USA	809.92	443.63	153.55	1023.49	2430.59	3.24316
USA	339.53	468.91	165.35	592.28	1566.06	3.93667
USA	1461.82	1097.63	273.67	1413.64	4246.76	3.1336
USA	824.52	835.15	139.59	1916.32	3715.59	3.38652
USA	604.39	440.99	86.79	713.94	1846.11	3.24951
USA	579.68	423.63	85.02	2173.88	3262.21	3.75719
USA	147.31	43.68	49.26	363.34	603.58	3.65279
USA	479.67	421.74	102.54	1267.4	2271.34	4.18012
USA	390.36	452.86	102.36	616.55	1562.13	3.31886
USA	347.03	891.67	173.93	1850.8	3263.43	2.31449
USA	1665.13	1978.07	230.53	1977.75	5851.48	2.71278
USA	1417.15	1273.63	129.4	3209.78	6029.96	3.58637
USA	657.46	627.78	140.38	1314.84	2740.46	3.26584
USA	830.07	325.74	97.79	1995.53	3249.13	2.71448
USA	766.36	1382.45	263.9	1696.17	4108.88	3.22167
USA	1309.33	1002.01	135.82	1145.75	3592.9	3.32919
USA	95.01	516.32	1.53	1262.59	1875.45	2.37409
USA	820.07	909.74	182.51	2899.31	4811.62	3.5161
USA	296.06	526.46	191.7	1276.11	2290.32	3.91017
USA	1218.95	964.85	105.16	1642.13	3931.1	3.83
USA	996.6	590.26	185.1	1321.35	3093.3	2.76516
USA	235.39	277.11	167.95	1338.56	2019.01	3.49317
USA	1133.79	1004.01	36.75	2379.26	4553.81	3.2232
USA	355.29	642.76	26.67	1621.1	2645.82	3.34906
USA	1754.4	1449.81	59.75	1705.06	4969.03	3.36691
USA	552.27	314.29	107.95	1097.15	2071.66	3.03673
USA	555.6	1460.42	214.63	1266.8	3497.45	3.65841
USA	1257.03	1266.25	187.62	1056.75	3767.64	3.23019
USA	2844.53	859.99	72.85	2959.14	6736.51	3.55172
USA	338.24	552.22	116.6	915.16	1922.23	3.46112
USA	792.29	626.46	123.17	2002.13	3544.05	2.86463
USA	2713.3	774.48	65.77	2517.14	6070.68	3.26258
USA	880.16	1197.44	77.13	1784.47	3939.2	3.70573
USA	383.36	353.54	100.96	777.37	1615.23	3.54143
USA	1211.93	635.1	85.85	1199.39	3132.26	1.91829
USA	469.67	345.3	90.44	954.53	1859.93	3.48726
USA	789.32	1090.8	260.74	2232.13	4372.99	3.77206
USA	1368.29	1679.97	136.3	3312.74	6497.3	3.13534
USA	739.69	217.28	29.55	1059.92	2046.44	3.36317
USA	757.62	1476.63	320.56	1456.94	4011.75	3.29537
USA	903.78	997.41	92.12	2586.74	4580.04	3.58228
USA	486.34	1180.23	22.33	3170.75	4859.64	3.63229
USA	436.33	541.44	70.37	1247.58	2295.72	3.66413
USA	1352.95	596.85	109.24	1787.47	3846.51	2.41214
USA	564.28	269.74	112.09	614.9	1561.02	3.53333
USA	215.33	104.82	57.38	239.88	617.41	1.67411
USA	575	741.72	157.22	913.51	2387.46	4.18256
USA	841.53	785.25	186.88	1441.06	3254.72	3.33644
USA	268.37	536.18	6.56	1589.69	2400.8	2.2747
USA	519.93	429.78	166.29	605.76	1721.76	2.78548
USA	1183.09	837.57	172.28	1423.68	3616.63	3.1808
USA	1481.96	870.54	153.25	1732.03	4237.79	3.39362
USA	690.71	527.6	144.02	652.51	2014.84	2.95273
USA	298.68	139.48	64.21	511.07	1013.45	2.00725
USA	448.21	728.75	63.86	1739.52	2980.34	2.56318
USA	641.17	977.16	72.8	1193.69	2884.83	3.19452
USA	806.41	1611.61	53.51	1229.8	3701.33	3.35333
USA	351.58	369.05	51.88	1045.21	1817.72	3.28486
USA	1533.46	1178.91	151.71	3101.69	5965.77	3.5819
USA	1188.61	763.03	59.75	2254.65	4266.04	3.52499
USA	3800.3	1260.85	38.46	3867.35	8966.96	3.1372
USA	1930.15	830.44	200.53	4386.8	7347.92	2.75039
USA	717.84	615.45	103.61	1945.68	3382.58	2.92324
USA	1063.05	768.76	95.95	2168.78	4096.54	3.67218
USA	858.22	889.91	159.68	2012.04	3919.85	3.0917
USA	1130.83	819.86	161.11	1942.98	4054.79	1.85468
USA	1178.61	615.45	194.66	2900.21	4888.93	3.59007
USA	327.33	365.36	143.59	703.9	1540.19	3.50676
USA	740.8	836.16	299.39	1468.27	3344.63	2.3167
USA	1013.41	1199.18	103.56	2469.94	4786.09	3.22342
USA	1649.76	1223.41	223.77	3645.16	6742.09	2.73386
USA	684.5	1929.61	303.58	1670.35	4588.04	3.42269
USA	2207.58	2645.94	538.74	3564.09	8956.35	3.93619
USA	301.02	471.83	151.05	1716.29	2640.19	3.12653
USA	930.44	468.75	104.43	1807.26	3310.88	3.09189
USA	811.92	594.3	103.2	1823.18	3332.6	3.3447
USA	1218.62	2129.62	38.51	5389.67	8776.41	3.04422
USA	504.86	1685.54	47.49	1272.8	3510.69	3.30342
USA	543.75	491.65	122.25	1523.22	2680.87	3.09075
USA	1720.95	539.69	106.41	1501.29	3868.35	3.86218
USA	675.98	796.07	324.06	2366.35	4162.46	4.07105
USA	762.79	1211.29	411.02	1754.51	4139.6	3.7669
USA	1671.04	2284.08	206.83	2569.58	6731.54	3.34668
USA	1323.81	1101.82	110.76	3314.87	5851.26	3.22886
USA	1077.86	3729.7	75.88	4050.51	8933.95	3.43885
USA	474.85	575.8	152.53	1473.68	2676.86	3.02073
USA	811.18	398.7	51.42	3837.32	5098.62	2.0748
USA	375.59	272.48	74.55	849.74	1572.36	2.45019
USA	630.42	720.3	84.05	1985.32	3420.09	3.01619
USA	733.39	662.15	117.25	1847.5	3360.28	2.31298
USA	2415.72	1437.28	146.29	2268.42	6267.71	2.79234
USA	1843.48	2280.29	304.86	4672.05	9100.67	3.5263
USA	1191.21	1041.9	37.33	3023.62	5294.05	3.27676
USA	799.2	571.79	105.88	981.23	2458.1	3.32001
USA	1643.84	1152.92	268.86	4041.5	7107.11	3.69072
USA	420.77	416.28	60.31	1192.63	2089.99	3.10363
USA	958.71	1002.23	173.17	1298.42	3432.53	3.92488
USA	NA	NA	NA	NA	NA	4.15077
USA	528.61	317.22	63.78	744.95	1654.57	3.02917
USA	871.55	698.27	125.26	2306.3	4001.38	3.1039
USA	801.24	648.95	187.95	1451.25	3089.39	2.81379
USA	883.4	983.31	123.17	2281.08	4270.96	3.62552
USA	772.03	572.23	127.05	1023.64	2494.95	3.13498
USA	1012.67	846.3	172.75	2129.44	4161.17	2.90623
USA	899.7	980.22	323.75	2522.18	4725.86	3.19865
USA	885.63	2638.45	2.91	5209.51	8736.5	2.16757
USA	493.37	576.24	158.1	1626.21	2853.92	3.44199
USA	1352.4	980.46	119.05	1449	3900.91	2.61091
USA	467.44	447.6	109.69	1081.54	2106.27	3.3453
USA	1285.31	2536.89	226.58	2112.6	6161.37	2.07501
USA	369.4	213.93	73.89	975.24	1632.47	2.74643
USA	1109.72	1353.81	203.49	2764.79	5431.82	3.39358
USA	982.3	611.92	155.34	2042.07	3791.63	2.75719
USA	629.34	593.33	205.99	1204.18	2632.85	3.19662
USA	651.71	651.37	107.63	800.24	2210.95	2.93738
USA	1124.5	1137.86	121.01	1496.8	3880.18	3.24321
South Africa	252.48	804.59	208.06	965.8	2230.93	4.17957
USA	2101.51	1253.5	159.21	2199.5	5713.72	3.32527
USA	706.72	566.11	159.12	994.16	2426.11	3.05439
USA	516.97	537.93	123.28	713.79	1891.97	3.05397
USA	1363.3	2089.09	643.66	1663.11	5759.16	3.86778
USA	1243.9	878.68	201.48	1325.84	3649.91	2.99926
USA	1137.63	994.75	358.78	2111.1	4602.26	4.01613
USA	803.64	703.03	145.42	1132.71	2784.81	3.37352
South Africa	560.03	766.12	137.47	1116.98	2580.61	3.89183
USA	1400.82	1734.05	374.83	2192.01	5701.72	3.17397
USA	3360.64	2251.21	582.14	6419.56	12613.5	3.11316
USA	504.58	386.47	108.5	477.36	1476.91	3.62323
USA	1075.52	799.54	135.56	1583.7	3594.32	3.88219
USA	1634.82	1419.69	71.7	2049.67	5175.88	3.20241
USA	1360.35	1768.79	76.29	2081.14	5286.56	2.82934
USA	575	2317.06	6.27	2753.87	5652.2	3.5363
USA	497.93	532	116.12	575.05	1721.1	2.24287
South Africa	618.26	395.04	113.6	1093.61	2220.5	3.90033
USA	1219.69	2134.81	194.07	1756	5304.57	2.69123
USA	1827.78	967.27	262.71	1526.77	4584.53	3.66143
USA	334.17	466.49	178.62	534.59	1513.88	1.72621
USA	1078.11	1497.95	219.17	1355.66	4150.89	3.72939
USA	522.51	1234.81	320.81	820.47	2898.6	2.66795
USA	1031.53	627.41	178.37	1523.77	3361.08	4.14407
USA	639.51	503.42	70.51	1189.65	2403.09	3.42696
USA	1044.47	648.51	165.4	1766.49	3624.88	3.52797
USA	243.42	234.34	96.04	361.09	934.89	4.12774
USA	368.96	292.97	71.7	821.21	1554.83	3.19014
USA	770.43	658.62	80.22	1874.22	3383.5	3.32146
USA	598.29	789.21	137.73	907.22	2432.45	2.58251
USA	753.37	604.11	113.04	1075.93	2546.43	3.12631
USA	817.87	320.96	66.3	734.02	1939.15	3.8134
South Africa	1160.73	229.95	38.66	1425.63	2854.96	2.61539
USA	939.3	663.24	523.39	1790.47	3916.4	4.12939
South Africa	2084.88	651.81	188.1	1501.29	4426.08	3.33106
South Africa	410.51	395.92	166.78	706.6	1679.8	4.47841
USA	562.27	1096.09	108.87	2574.13	4341.36	3.51098
USA	1672.52	1810.56	193	3084.99	6761.07	3.35964
South Africa	892.54	649.39	323.87	1532.76	3398.56	4.16114
South Africa	528.24	398.78	226.96	959.06	2113.05	3.31226
South Africa	789.04	1263.39	298.39	1323.6	3674.41	4.02727
USA	514.49	512.8	162.95	1638.82	2829.05	3.4434
South Africa	1665.87	1769.23	240.11	2265.43	5940.63	2.64602
USA	1163.5	613.56	341.2	1289.43	3407.69	2.75221
South Africa	843.38	643.24	230.2	1286.74	3003.55	3.35356
USA	4474.72	1633.59	205.35	3675.32	9988.99	2.58433
USA	2.45	1.31	0.65	20.44	24.85	1.26589
USA	711.96	1204.25	37.79	1693.08	3647.08	3.20329
USA	558.37	482.98	123.94	796.94	1962.23	3.46728
USA	766.86	696.88	82.33	1216.32	2762.38	2.6015
USA	2253.07	2627.02	301.96	2885.72	8067.77	3.01035
South Africa	1662.17	758.43	28.13	1667.61	4116.34	1.89093
USA	1669.2	1268.01	251.09	1480.47	4668.76	3.32306
USA	770.74	853.84	161.58	1404.65	3190.81	3.32402
USA	2619.04	1400.35	418.66	3269.28	7707.33	3.19697
USA	2676.51	3055.65	297.3	4068.52	10098	3.47275
USA	712.28	714.57	143.44	2225.23	3795.52	3.82774
South Africa	2639.37	773.38	70.1	1565.72	5048.56	3.68771
USA	552.46	544.53	59.37	1139.31	2295.66	3.23425
South Africa	281.87	228.19	122.06	628.99	1261.09	4.14467
USA	547.45	756.42	168.21	1595.28	3067.37	3.1849
South Africa	1130.6	541.23	142.9	1431.17	3245.91	4.03279
South Africa	1248.15	421.86	37.74	855.98	2563.73	3.50105
South Africa	952.24	378.77	129.47	1549.24	3009.73	3.13209
South Africa	1042.99	984.42	191.01	1642.13	3860.55	4.24485
USA	1478.45	1676.68	147.89	1824.93	5127.95	3.37012
South Africa	2458.23	2047.76	145.32	2902.2	7553.51	3.21466
USA	395.96	822.95	239.34	1431.04	2889.29	3.91254
USA	2029.05	755.98	28.57	3600.12	6413.72	3.39002
USA	211.05	196.53	66.49	729.63	1203.7	3.61801
USA	506.62	798.88	135.69	717.98	2159.17	3.34995
South Africa	1095.49	744.36	56.98	915.31	2812.13	3.12713
South Africa	1498.6	1373.53	140.12	1693.08	4705.32	3.22289
USA	652.64	971.85	13.19	3801.29	5438.98	2.44416
South Africa	1134.67	1274.6	196.95	1738.02	4344.24	3.54485
USA	555.97	155.36	42.83	864.37	1618.53	2.62712
USA	1101.94	1856.04	296.84	1355.37	4610.19	3.43927
USA	1431.97	817.22	5.63	2608.96	4863.78	3.23233
USA	438.18	376.54	75.37	1217.85	2107.95	3.40636
USA	908.96	657.74	147.78	2550.11	4264.59	3.97979
South Africa	599.03	422.74	83.99	852.68	1958.44	3.82155
South Africa	1422.08	979.58	205.18	1556.73	4163.57	4.16236
USA	1069.24	764.14	63.96	1094.81	2992.15	3.33813
USA	533.97	599.49	131.2	697.01	1961.67	3.78244
USA	417.16	538.37	84.39	1158.03	2197.96	1.94088
USA	795.62	651.13	71.34	2225.83	3743.92	3.24666
USA	1170.53	1520.16	76.44	1269.66	4036.78	3.01577
USA	847.48	1045.43	154.73	2528.19	4575.82	3.3861
USA	832.66	790.52	162.01	783.01	2568.2	2.74285
USA	404.11	306.14	114.03	1362.58	2186.85	3.84579
USA	948.22	142.08	92.63	1223.26	2406.19	3.00578
USA	957.11	1233.54	19.57	2645.29	4855.52	3.19366
USA	1604.57	843.65	27.13	3534.06	6009.42	3.65204
USA	364.77	255.08	46.35	801.69	1467.89	2.93053
USA	1344.27	1330.88	108.09	1564.22	4347.46	3.08179
USA	665.2	473.08	117.14	1330.79	2586.21	3.01319
USA	947.25	693.8	39.32	1149.04	2829.41	2.96457
USA	549.5	648.51	89.29	870.36	2157.66	3.57482
USA	557.26	622.57	99.33	783.31	2062.47	3.22903
South Africa	882.93	725.67	70.33	1148.44	2827.38	3.68004
South Africa	562.62	438.57	126.08	889.99	2017.26	3.25718
South Africa	1888.96	624.11	66.4	1352.06	3931.54	2.90772
South Africa	856.32	542.33	61.59	1232.65	2692.89	3.28928
South Africa	524.18	245.99	65.26	616.55	1451.98	3.29921
USA	393.87	604.54	265.01	1140.2	2403.63	3.4489
USA	559.85	566.29	26.25	698.51	1850.89	3.24187
USA	1564.03	1442.99	177.2	1815.94	5000.16	3.67581
USA	1157.03	588.06	220.21	811.63	2776.93	3.10012
USA	359.68	222.91	121.19	327.98	1031.76	1.98139
USA	284.45	419.66	168.66	730.87	1603.65	2.31957
South Africa	1396.94	947.93	68.42	1365.1	3778.38	3.72555
South Africa	1406	1434.2	448.22	2096.12	5384.54	3.14087
South Africa	641.91	474.62	112.73	934.49	2163.75	4.32102
USA	976.64	1113.46	188.72	1002.81	3281.63	2.78641
South Africa	1539.08	1469.37	156.97	1661.61	4827.03	3.27743
South Africa	1057.41	515.29	86.64	1169.72	2829.06	3.41788
South Africa	544.69	604.11	94.89	1190.1	2433.79	2.03274
South Africa	617.33	743.04	60.19	1253.78	2674.33	3.86617
South Africa	1839.79	1548.51	160.3	1833.92	5382.53	3.3899
South Africa	390.18	477.7	121.98	502.98	1492.83	3.31401
South Africa	1714.85	1206.89	46.78	1893.85	4862.37	3.71779
South Africa	1036.71	1634.25	293.04	1437.02	4401.01	3.61523
South Africa	423.81	699.95	259.15	757.24	2140.15	3.59572
South Africa	531.57	1163.36	220.31	1310.26	3225.51	3.87629
USA	915.65	535.96	210.68	1039.97	2702.25	2.51229
South Africa	401.45	1027.29	219.96	716.64	2365.33	3.69361
South Africa	2145.87	1253.94	145.3	1859.39	5404.49	3.48839
South Africa	2574.68	836.25	60.57	1555.23	5026.73	3.50867
USA	403.67	316.56	49.54	634.98	1404.74	3.05041
South Africa	588.5	861.97	220.92	1187.85	2859.24	3.61715
USA	293.14	517.27	136.27	574.15	1520.83	3.18274
USA	2060.85	1177.87	34.27	2126.08	5399.08	2.96849
USA	298.31	197.02	91.78	479.01	1066.12	3.88131
South Africa	308.3	379.21	118.08	367.38	1172.97	2.9815
South Africa	950.58	1711.85	366.93	1721.54	4750.91	3.62044
USA	750.22	1557.31	342.73	1236.84	3887.1	3.20366
USA	1517.82	923.3	63.37	1818.93	4323.43	2.77928
South Africa	851.14	1109.5	128.2	1488.41	3577.25	3.32136
USA	566.5	517.71	97.42	632.58	1814.21	2.81157
South Africa	950.76	681.49	147.84	1129.57	2909.66	3.31142
South Africa	594.6	482.32	58.2	1016	2151.11	3.14799
USA	1621.88	594.87	30.76	1949.28	4196.79	3.18674
USA	972.57	1164.68	90.41	1498.3	3725.96	3.68783
South Africa	750.22	637.52	263.73	861.82	2513.3	3.09802
USA	840.42	855.6	162.06	1420.99	3279.06	3.06622
USA	1286.04	1397.93	154.62	1499.8	4338.39	3.48928
South Africa	1754.96	1235.47	98.64	1895.35	4984.41	3.59041
South Africa	188.71	408.67	154.39	750.5	1502.27	4.24578
South Africa	1286.41	1471.57	253.72	1405.1	4416.81	4.00927
South Africa	961.11	989.91	94.82	1631.65	3677.49	2.96328
South Africa	296.47	33.7	49.66	711.69	1091.52	2.8069
South Africa	774.07	722.16	97.26	1128.67	2722.15	2.8805
South Africa	2140.33	2488.53	321.58	2168.04	7118.46	3.79677
South Africa	330.66	204.89	99.25	892.24	1527.03	4.20244
USA	1042.62	1151.05	117.04	1387.42	3698.14	3.27875
USA	242.13	331.07	144.25	522.01	1239.45	3.3177
South Africa	1218.4	1126.43	173.71	1706.56	4225.1	3.37687
South Africa	661.51	423.84	252.9	1262.17	2600.41	3.69043
South Africa	2254.92	903.52	21.36	1422.63	4602.43	2.37541
South Africa	943.37	1175.67	235.68	1464.89	3819.61	3.49852
South Africa	256.36	312.6	114.31	658.95	1342.22	3.12773
South Africa	1999.86	360.31	136.96	1391.17	3888.3	3.39758
South Africa	91.32	50.25	6.77	324.38	472.73	3.16103
South Africa	808.26	491.33	88.19	1298.27	2686.06	3.71935
South Africa	1249.08	231.93	24.24	1155.79	2661.03	2.02237
South Africa	1209.71	1498.39	85.26	2454.21	5247.57	3.43888
South Africa	934.13	631.36	55.6	1155.49	2776.58	3.56794
South Africa	1120.44	850.32	73.64	1321.8	3366.2	3.28798
South Africa	510.68	571.35	208.11	1037.87	2328.01	3.91243
South Africa	2432.36	591.13	128.55	1705.06	4857.11	3.18784
South Africa	1136.89	954.52	180.28	1679.59	3951.28	3.95844
South Africa	1005.1	1144.68	103.4	1694.57	3947.76	2.75413
South Africa	1182.54	1352.42	366.17	1465.19	4366.31	3.31203
South Africa	832.47	1578.85	195.29	1750.01	4356.62	2.34818
South Africa	369.84	625.21	162.27	887.59	2044.91	3.43506
South Africa	889.03	2074.8	287.43	1706.56	4957.82	2.51418
South Africa	431.58	399.44	114.08	773.72	1718.82	3.42528
South Africa	589.79	530.02	172.46	929.09	2221.36	2.81972
South Africa	380.56	683.9	53.26	706.75	1824.47	3.53319
South Africa	774.44	784.15	231.8	1015.85	2806.24	3.54054
South Africa	759.46	1130.39	269.59	1014.95	3174.39	3.73417
South Africa	1589.35	2220.33	56.65	2018.21	5884.53	3.56361
South Africa	4262.17	2521.5	88.24	4237.19	11109.1	3.63625
South Africa	640.06	580.36	135.79	1100.35	2456.57	2.63504
South Africa	739.13	386.69	118.03	1118.03	2361.88	3.3251
South Africa	2465.63	1334.18	52.52	2440.73	6293.05	3.15781
South Africa	1394.54	1706.14	281.57	2018.21	5400.45	3.97607
South Africa	277.8	1406.72	340.18	1779.98	3804.67	2.85936
South Africa	1456.09	349.76	43.73	996.22	2845.79	3.2277
South Africa	1252.41	853.18	36.31	1254.82	3396.72	3.49283
South Africa	837.46	975.19	84.45	967.45	2864.54	3.60684
South Africa	622.51	985.74	133.12	1815.94	3557.3	2.16636
South Africa	1534.46	1222.94	248.57	2177.03	5182.99	3.11664
South Africa	900.12	1453.33	85.41	1787.47	4226.33	3.28445
South Africa	1305.82	823.72	119.61	1461.89	3711.04	3.4425
South Africa	202.57	395.7	100.6	444.4	1143.27	4.11377
South Africa	882.38	428.24	27.29	778.07	2115.97	3.76237
South Africa	2652.3	1232.61	51.19	1832.42	5768.53	3.37355
South Africa	1584.54	1331.32	245.05	1538.75	4699.67	3.40602
South Africa	783.12	753.81	132.91	1037.42	2707.27	3.33362
South Africa	266.71	336.35	122.36	833.35	1558.77	2.96223
South Africa	1903.74	935.62	11.83	902.12	3753.32	3.03968
South Africa	860.38	945.73	142.19	1541.75	3490.04	3.12764
South Africa	837.65	725.23	182.57	1172.42	2917.87	3.53977
South Africa	668.53	339.2	124.78	1622.66	2755.17	3.77146
South Africa	1375.87	1475.97	174.52	911.41	3937.78	3.06505
South Africa	2430.51	1477.29	98.21	3332.21	7338.22	3.44221
South Africa	504.77	430	63.14	941.98	1939.89	3.12934
South Africa	463	289.52	144.73	713.79	1611.04	4.25152
South Africa	259.32	128.84	99.33	422.67	910.16	3.7674
South Africa	1105.1	1245.8	276.73	1400.91	4028.53	4.19701
South Africa	2622.73	1809.24	145.7	3338.21	7915.88	3.13542
South Africa	227.89	0.67	50.84	519.91	799.31	2.68851
South Africa	863.34	392.62	20.92	1565.72	2842.6	3.83926
South Africa	1457.75	1606.77	359.8	1875.87	5300.19	3.36293
South Africa	3023.81	908.36	39.88	2150.06	6122.1	3.10262
South Africa	805.86	892.31	72.19	1279.25	3049.6	1.4782
South Africa	844.86	745.9	187.21	1156.69	2934.65	3.29592
South Africa	1406.37	674.67	48.01	1504.29	3633.34	3.58657
South Africa	228.26	164.99	104.98	464.32	962.56	3.9838
South Africa	416.61	213.17	79.4	619.7	1328.88	3.40282
South Africa	1834.8	926.82	119.58	2049.67	4930.88	3.0121
South Africa	790.89	1028.83	194.83	992.92	3007.46	3.29042
South Africa	654.11	660.16	61.69	989.18	2365.14	3.6452
South Africa	440.26	718.86	247.12	1426.08	2832.32	3.99119
South Africa	443.41	468.69	103.07	727.42	1742.59	3.69151
South Africa	659.66	540.35	134.67	1037.57	2372.25	3.60734
South Africa	466.14	329.53	95.66	687.87	1579.2	3.97358
South Africa	1916.68	781.29	43.01	1394.32	4135.3	3.14741
South Africa	1002.33	693.8	120.09	1297.83	3114.05	2.61837
South Africa	574.82	583.66	174.14	1064.69	2397.31	3.12198
South Africa	1296.21	652.69	109.9	1311.01	3369.81	2.34917
South Africa	3313.99	830.75	66.89	2278.91	6490.55	3.54659
South Africa	363.74	612.24	185	709.89	1870.87	3.69593
South Africa	918.42	547.61	103.68	828.41	2398.12	3.27194
South Africa	1056.49	1988.62	713.48	2093.12	5851.71	2.19242
South Africa	375.39	1168.2	385.02	1787.47	3716.08	3.49847
South Africa	1320.61	1007.28	103.33	2482.68	4913.89	4.05896
South Africa	1822.24	988.82	68.57	1519.27	4398.89	3.04831
South Africa	488.13	666.54	125.01	1144.55	2424.23	3.76895
South Africa	2388	1684.59	229.97	1988.24	6290.8	3.26164
South Africa	676.48	479.68	101.14	978.39	2235.68	2.40646
South Africa	470.02	474.62	114.05	1062.59	2121.29	3.34984
South Africa	852.62	895.83	160.97	1408.4	3317.81	2.3367
South Africa	784.6	854.06	334.83	2042.18	4015.66	3.92079
South Africa	335.47	837.13	154.93	1421.28	2748.81	3.17194
South Africa	801.24	989.69	59.58	1476.87	3327.38	3.79841
South Africa	491.09	646.75	46.27	803.84	1987.96	3.52916
South Africa	755.03	828.12	158.83	1292.73	3034.7	3.78846
South Africa	1677.14	776.68	105.52	1517.78	4077.11	3.33384
South Africa	485.92	505.84	60.11	1191	2242.86	2.70712
South Africa	412.91	807.67	194.02	1169.42	2584.02	3.23213
South Africa	221.06	295.46	11.39	663.15	1191.05	2.84814
South Africa	192.78	100.4	57.84	466.27	817.29	3.49491
South Africa	881.82	1062.46	169.94	1198.79	3313.01	3.75861
South Africa	468.17	402.3	77	543.73	1491.21	3.63912
South Africa	1992.46	1772.96	289.98	1916.32	5971.73	3.66311
South Africa	1986.92	749.42	50.22	1654.12	4440.68	3.42982
South Africa	886.63	965.07	176.28	1186.95	3214.93	3.28997
South Africa	930.43	1093.46	138.26	1585.2	3747.35	4.03369
South Africa	2071.94	971.67	67.98	1363.45	4475.04	3.51538
South Africa	1239.47	1529.39	329.73	1456.64	4555.23	2.50678
South Africa	679.06	557.5	157.86	862.42	2256.84	3.45274
South Africa	1183.65	898.9	185.45	1429.83	3697.83	2.76597
South Africa	309.22	359.43	108.19	820.17	1597.01	3.61352
South Africa	824.71	402.08	41.03	1103.2	2371.01	3.5356
South Africa	1002.33	1021.79	399.29	1379.48	3802.9	4.4741
South Africa	1541.66	781.07	54.12	1217.22	3594.07	3.85445
South Africa	1003.44	1152.59	64.98	1101.25	3322.26	3.54003
South Africa	605.69	1565.66	500.2	1272.05	3943.6	3.42682
South Africa	613.26	1507.18	312.66	1125.37	3558.48	4.26398
South Africa	2297.43	2108.87	74.51	1654.12	6134.93	3.34543
South Africa	1487.51	664.12	48.01	1550.74	3750.37	4.22104
South Africa	1055.56	965.29	142.9	1582.2	3745.96	3.16253
South Africa	638.4	451.98	114.51	906.62	2111.51	4.01117
South Africa	596.45	598.61	140.56	1038.02	2373.63	4.69492
South Africa	915.09	1070.81	16.42	1217.22	3219.54	3.70114
South Africa	817.69	1833.2	55.63	1541.75	4248.26	3.20463
South Africa	444.33	410.21	162.9	597.82	1615.26	3.69524
South Africa	1425.59	586.3	159.85	1201.33	3373.07	3.90548
South Africa	241.57	513.31	155.51	1083.87	1994.27	3.7329
South Africa	543.58	694.46	11.32	1510.28	2759.64	3.28312
South Africa	466.69	533.98	119.15	1230.25	2350.08	4.08002
South Africa	991.98	882.86	208.72	1547.74	3631.3	4.0713
South Africa	784.05	661.7	69.62	1127.77	2643.13	2.92996
South Africa	742.65	942.43	31.85	1312.66	3029.59	3.03003
South Africa	394.61	372.84	152.53	502.68	1422.66	2.4642
South Africa	1419.31	1186.89	323.61	1856.39	4786.2	4.03598
South Africa	894.58	571.13	41.69	1000.26	2507.66	4.15186
South Africa	1800.06	2308.26	257.87	2190.51	6556.7	3.97496
South Africa	826.74	772.28	250.84	1324.05	3173.91	3.911
South Africa	837.28	797.34	197.35	1290.48	3122.45	4.18931
South Africa	814.36	1056.96	299.15	1233.85	3404.32	4.47784
South Africa	946.33	1081.59	180.64	1347.57	3556.12	4.02823
South Africa	628.61	456.6	110.64	922.2	2118.04	3.54727
Ghana	2450	1530	19.7	3170	7169.7	2.41031
Ghana	2010	974	204	4530	7718	3.99469
South Africa	653.93	987.5	130.69	1395.66	3167.78	4.03935
South Africa	67.24	546.07	38.4	986.78	1638.49	3.71383
Ghana	1009.34	2905.43	3.93	3591.11	7509.81	3.88201
Ghana	1076.01	974.06	292.19	2638.38	4980.65	3.24248
South Africa	299.61	228.63	58.86	496.84	1083.93	2.6499
Ghana	789.69	1007.54	108.77	2772.6	4678.6	4.1852
Ghana	1564.94	1300.06	40.04	3951.42	6856.46	4.09713
Ghana	3235.44	1855.16	75.68	6954.02	12120.3	4.00281
Ghana	2722.07	2287.34	121.23	4648.02	9778.66	3.62137
Ghana	1271.21	1605.36	281.57	5053.38	8211.53	3.68891
South Africa	736.92	879.56	85.06	1133.61	2835.14	4.12613
Ghana	871.55	1882.03	270.95	2448.32	5472.85	4.2056
South Africa	193.15	230.17	45.31	257.71	726.33	3.66461
Ghana	1631.98	1465.27	41.77	4524.92	7663.94	3.42752
Ghana	3221	2749.91	44.3	6362.51	12377.7	3.93126
Ghana	2909.12	2076.31	35.5	3933.41	8954.34	3.53531
Ghana	2374.63	1790.4	116.12	5840.06	10121.2	3.57133
Ghana	1260.47	2052.52	117.7	4792.15	8222.85	3.40003
Ghana	2463.53	3060.06	72	4954.29	10549.9	3.9878
Ghana	1899.78	1299.62	19.93	5107.42	8326.76	3.36871
Ghana	2450.2	3197.07	84	5245.54	10976.8	3.76973
Ghana	1700.51	3442.46	120.36	5792.02	11055.3	3.85043
Ghana	2013.12	1739.73	55.87	6800.89	10609.6	4.25078
Ghana	970.45	712.81	297.1	2517.68	4498.03	4.84428
Ghana	2598.36	1488.62	58.93	4711.08	8856.98	3.48373
Ghana	1129.35	941.46	193.03	3035.63	5299.46	3.0862
Ghana	3900.31	2188.21	77.36	7194.23	13360.1	4.02498
Ghana	2257.59	2171.03	336.72	5041.37	9806.71	4.67826
Ghana	1259.36	974.06	131.24	3813.3	6177.96	3.30531
Ghana	1276.77	1553.82	52.14	5404.68	8287.41	4.04871
Ghana	2181.29	1868.81	87.68	3425.97	7563.74	3.30915
Ghana	552.64	477.56	123.88	1998.23	3152.31	3.56677
Ghana	1624.57	1573.2	158.61	4347.76	7704.15	4.52244
Ghana	1029.34	691.22	238.52	2943.45	4902.54	4.39074
Ghana	1087.49	2070.14	98.96	4449.85	7706.46	3.21722
Ghana	1448.26	2338.44	464.79	5065.39	9316.88	3.95452
Ghana	3.48	0.38	0.42	1686.26	1690.54	2.48424
Ghana	988.6	848.94	87.93	4086.54	6012.01	3.39653
Ghana	2083.5	1652.94	37.67	4590.98	8365.08	4.11315
Ghana	611.53	926.92	191.9	2051.08	3781.43	3.76715
Ghana	3766.97	4942.97	195.22	5206.51	14111.7	3.48854
Ghana	3481.39	1486.86	33.08	4215.65	9216.98	3.0791
Ghana	1149.35	1852.07	96.56	3095.68	6193.67	3.05508
Ghana	1293.81	2378.97	450.04	2998.7	7121.51	4.39831
Ghana	1086.75	1115.03	125.36	2810.13	5137.28	4.368
Ghana	2742.81	2163.98	53.16	3678.19	8638.14	3.59286
Ghana	1832	1840.62	168.62	3972.44	7813.67	3.7307
Ghana	1521.97	1344.12	203.9	3612.13	6682.12	3.89902
Ghana	1891.63	1500.07	172.86	3600.12	7164.68	3.30378
Ghana	2238.7	2767.54	380.59	4254.68	9641.5	4.02444
Ghana	1421.6	1311.96	224.23	3020.62	5978.4	4.17836
Ghana	1093.42	1023.4	306.7	2809.53	5233.05	4.6054
Ghana	970.08	897.84	150.74	2443.22	4461.88	3.69826
Ghana	2735.4	1360.86	89.52	4038.5	8224.28	4.16455
Ghana	1249.36	1800.09	100.39	6044.23	9194.07	3.61781
Ghana	1281.95	2354.74	111.99	4888.23	8636.91	4.29485
Ghana	3321.01	3167.11	17.25	3765.26	10270.6	3.70946
Ghana	3648.07	2656.52	41.46	5536.79	11882.8	3.51007
Ghana	1418.63	1350.29	66.54	3083.67	5919.13	3.78643
Ghana	1217.13	1331.78	99.93	4071.53	6720.38	4.19546
South Africa	537.11	355.03	77.31	888.34	1857.8	3.36315
Ghana	1580.13	3609.87	83.24	6221.39	11494.6	3.63207
South Africa	575.37	554.86	38.27	765.18	1933.69	3.2487
Ghana	1126.39	1651.18	74.04	3702.21	6553.82	4.29357
Ghana	1972.38	2384.7	277.39	3975.44	8609.9	4.18822
Ghana	1268.62	1095.21	268.09	3182.76	5814.67	3.59615
Ghana	1760.88	1333.54	179.34	3368.92	6642.68	3.59978
Ghana	1771.99	3654.8	82.98	4116.56	9626.34	3.2837
Ghana	1506.42	2689.12	96.72	4696.07	8988.32	3.28042
Ghana	1407.89	1193.89	153.65	3227.8	5983.23	4.08066
Ghana	3198.4	2376.33	39.7	4810.17	10424.6	3.82928
Ghana	1379.74	1421.21	176.53	4077.53	7055.02	4.46513
Ghana	872.29	2572.81	61.18	2523.39	6029.66	3.57027
Ghana	1357.15	1381.56	255.02	3972.44	6966.17	4.25101
Ghana	2657.25	4287.43	157.18	6551.67	13653.5	3.55822
Ghana	2732.07	1923	90.28	3759.26	8504.61	3.36075
South Africa	512.35	370.42	163	962.96	2008.73	3.72135
South Africa	600.33	731.61	104.17	1088.81	2524.92	4.41343
Ghana	1011.56	947.62	284.28	2191.6	4435.06	4.25513
South Africa	346.74	650.93	119.33	783.16	1900.16	2.35523
South Africa	1103.62	1595.78	187.82	1250.18	4137.4	3.43568
South Africa	502.92	307.99	141.47	582.69	1535.07	4.22362
South Africa	1346.67	1204.91	267.3	1238.49	4057.37	2.78065
Ghana	1294.92	1335.75	33.88	2271.77	4936.31	3.18388
Ghana	2815.04	2014.19	74.3	4266.69	9170.23	3.83155
Jamaica	360.79	735.57	298.9	941.53	2336.78	4.11337
South Africa	609.2	667.64	123.87	865.42	2266.12	2.91201
Ghana	368.14	180.18	142.27	1238.87	1929.47	4.48161
Ghana	2480.94	1837.53	57.5	4633.01	9008.98	3.52771
Ghana	3527.69	1552.06	64.39	3149.73	8293.87	2.30276
South Africa	906.96	1573.57	113.26	1667.61	4261.4	3.36774
South Africa	1435.57	1549.39	137.96	1895.35	5018.27	3.79914
South Africa	1022.48	1610.07	360.82	2022.7	5016.06	3.98985
Ghana	2132.76	2249.01	24.79	3347.9	7754.46	2.87344
Jamaica	445.25	491.11	186.27	912.61	2035.25	3.63869
South Africa	2561.74	1824.85	80.42	1886.36	6353.36	3.59418
Ghana	2869.49	1015.47	211.56	4071.53	8168.04	3.7654
Jamaica	1927.77	1159.85	120.81	1877.37	5085.79	3.68966
South Africa	275.58	228.41	185.05	510.17	1199.21	3.7418
Ghana	1607.91	1795.24	89.87	4636.01	8129.04	2.2021
Jamaica	426.96	318.32	99.86	543.13	1388.27	3.18998
Jamaica	591.09	2074.8	9.37	2148.56	4823.81	2.69579
Ghana	1315.29	952.47	259.92	4047.5	6575.19	2.63169
South Africa	2044.22	801.96	68.77	1249.88	4164.83	3.7394
South Africa	1326.34	1056.08	28.21	1735.03	4145.66	2.47647
Jamaica	497.56	756.45	280.04	1210.02	2744.08	3.56212
Ghana	3609.55	1796.56	45.15	4128.58	9579.84	3.31842
South Africa	1347.96	1739.11	33.15	1235.35	4355.57	2.96297
Ghana	868.59	1489.5	100.75	3741.24	6200.08	3.76059
Ghana	1583.46	1718.59	46.38	3179.75	6528.18	3.6387
South Africa	1042.07	505.84	158.65	1275.65	2982.21	3.88155
Jamaica	1440.93	787.67	117.78	1430.72	3777.1	3.11932
Jamaica	961.67	768.76	20.58	1883.36	3634.37	1.74549
Jamaica	817.69	658.18	42.86	971.95	2490.68	3.71185
Ghana	1691.99	1950.31	117.04	2751.28	6510.63	3.48197
South Africa	476.86	896.05	230.94	1283.44	2887.29	3.66676
Ghana	1684.21	1426.94	86.1	4416.82	7614.07	3.37739
South Africa	2382.45	1330.22	108.12	1471.18	5291.97	3.68461
Ghana	836.73	640.56	201.66	2444.42	4123.37	3.42031
South Africa	1438.71	882.42	172.71	1610.67	4104.51	3.3093
South Africa	343.04	468.91	273.67	982.88	2068.5	4.1938
Ghana	1370	578	38.4	5080	7066.4	3.01529
South Africa	397.38	350.86	113.37	733.87	1595.47	3.5364
Ghana	1497.53	1345	88.39	3495.03	6425.95	3.65721
Ghana	1044.9	1425.62	332.94	2875.59	5679.05	3.3352
Seychelles	NA	NA	NA	NA	NA	3.00262
Seychelles	NA	NA	NA	NA	NA	2.48933
Seychelles	NA	NA	NA	NA	NA	2.62601
Seychelles	NA	NA	NA	NA	NA	2.33424
Seychelles	NA	NA	NA	NA	NA	3.47785
Seychelles	NA	NA	NA	NA	NA	2.73237
Seychelles	NA	NA	NA	NA	NA	2.53876
Seychelles	NA	NA	NA	NA	NA	3.81097
Seychelles	NA	NA	NA	NA	NA	2.84417
Seychelles	NA	NA	NA	NA	NA	2.86106
Seychelles	NA	NA	NA	NA	NA	2.79607
Ghana	681.91	1448.53	76.04	2144.16	4350.63	2.88492
Seychelles	NA	NA	NA	NA	NA	3.86634
Seychelles	NA	NA	NA	NA	NA	1.81282
Seychelles	NA	NA	NA	NA	NA	3.99983
Seychelles	NA	NA	NA	NA	NA	2.79717
Seychelles	NA	NA	NA	NA	NA	3.23906
Seychelles	NA	NA	NA	NA	NA	1.75392
Seychelles	NA	NA	NA	NA	NA	3.15186
Seychelles	NA	NA	NA	NA	NA	2.96289
Seychelles	NA	NA	NA	NA	NA	3.22112
Ghana	2390	1190	30.5	4230	7840.5	3.16587
Seychelles	NA	NA	NA	NA	NA	2.46498
Ghana	1770.88	1593.91	29.47	2889.1	6283.37	3.42994
Seychelles	NA	NA	NA	NA	NA	3.24763
Jamaica	1032.27	1757.14	538.17	1499.8	4827.37	2.34634
Seychelles	3230	989	49.6	5690	9958.6	2.69151
Seychelles	606	215	82.1	1370	2273.1	3.93765
Jamaica	1091.79	1003.1	97.42	1787.47	3979.78	2.33785
Seychelles	1280	1410	37	5460	8187	2.95226
Seychelles	904	370	108	2850	4232	1.89224
Jamaica	1382.53	1159.41	221.33	1965.77	4729.03	3.3672
Ghana	1549.01	1374.52	46.78	3167.74	6138.05	3.03206
Ghana	2540	1850	372	4060	8822	4.03954
Ghana	1440	801	281	2230	4752	4.26946
Seychelles	1550	335	71.5	2560	4516.5	1.97234
Seychelles	472	165	115	4040	4792	3.03733
Seychelles	3960	1020	99.9	6410	11489.9	3.24939
Seychelles	1290	439	25.5	3540	5294.5	2.61405
South Africa	564.84	612.46	94.97	642.17	1914.44	3.74231
Seychelles	1550	1150	32.5	5360	8092.5	3.24643
Ghana	2080	753	242	4090	7165	0.893851
Ghana	2524.28	1745.02	81.6	4335.75	8686.65	3.56943
Seychelles	1860	626	78.4	3090	5654.4	3.88966
Seychelles	1170	405	90.8	5340	7005.8	1.33361
Ghana	1349.74	1656.91	208.7	6287.44	9502.79	4.09987
Seychelles	947	441	102	5560	7050	2.71015
Seychelles	1370	442	140	2520	4472	3.79386
Seychelles	1400	431	11.9	3610	5452.9	2.7191
South Africa	249.15	511.77	198.93	390.61	1350.46	2.42758
Seychelles	2730	794	35.1	4520	8079.1	3.33083
Seychelles	973	299	91.8	1330	2693.8	1.47641
Jamaica	227.53	193.21	91.07	532.49	1044.3	3.85677
Seychelles	710	674	15.9	2350	3749.9	2.81533
Jamaica	1052.79	1197.88	153.47	1333.93	3738.08	3.13554
Seychelles	1150	596	131	5030	6907	2.98681
Seychelles	842	466	216	1410	2934	3.86769
Seychelles	3230	1220	52.8	5880	10382.8	2.85017
Seychelles	1300	721	43.1	4310	6374.1	2.63505
Seychelles	3150	411	13.3	2880	6454.3	2.05664
Ghana	2160.91	1960.89	106.32	4699.07	8927.19	3.17527
Seychelles	1090	819	36.6	4770	6715.6	1.63543
Seychelles	907	591	92.5	4730	6320.5	2.78423
Seychelles	972	442	71.9	2590	4075.9	3.12305
Seychelles	64.1	106	108	58.8	336.9	2.63291
Jamaica	1091.23	1633.15	46.27	2144.06	4914.72	3.06488
Seychelles	914	334	105	1840	3193	3.67871
Seychelles	1180	657	143	4320	6300	2.7566
Seychelles	989	1290	6.05	5670	7955.05	1.48937
Jamaica	893.1	338.55	65.46	1311.61	2608.71	2.42319
Seychelles	595	427	5.63	2910	3937.63	0.884895
Seychelles	483	296	102	1000	1881	3.12519
Seychelles	631	212	141	1290	2274	2.81995
Seychelles	4350	861	54.6	4430	9695.6	4.20282
Seychelles	911	880	48.6	855	2694.6	3.41221
Seychelles	484	179	122	1200	1985	1.4153
Seychelles	209	86.9	74.8	804	1174.7	2.97406
Seychelles	1480	910	290	2650	5330	3.7413
Seychelles	455	215	105	1290	2065	3.67197
Seychelles	950	379	120	2800	4249	4.09208
Jamaica	NA	NA	NA	NA	NA	2.51629
Ghana	393.36	210.85	58.98	1178.82	1842.01	3.51822
Seychelles	190	74.2	109	1010	1383.2	3.79695
Seychelles	2580	961	33.2	3600	7174.2	3.63814
Seychelles	757	290	221	1600	2868	3.07778
Ghana	1710.14	1957.36	29.76	4209.65	7906.9	3.38265
Seychelles	522	301	139	1500	2462	3.93151
Seychelles	5160	1060	58.4	5290	11568.4	3.29817
Seychelles	2290	565	86.4	3480	6421.4	3.7645
Seychelles	1140	934	129	2830	5033	3.55137
Seychelles	1250	856	70.3	2450	4626.3	3.45405
Seychelles	705	431	67.7	2620	3823.7	3.87722
Seychelles	2250	555	30.4	3880	6715.4	3.26937
Seychelles	1860	899	51.5	5730	8540.5	2.83049
Seychelles	1160	429	90.9	2160	3839.9	3.70448
Seychelles	403	106	128	335	972	2.30376
Seychelles	1610	739	132	2960	5441	3.80405
Seychelles	1690	859	261	5770	8580	3.47279
Seychelles	2580	879	96.6	3990	7545.6	2.65333
Seychelles	1740	702	45.2	4450	6937.2	2.70317
Seychelles	876	457	125	2310	3768	2.61422
Seychelles	1120	631	243	2770	4764	3.72083
Seychelles	1160	581	43.1	3390	5174.1	2.06616
Seychelles	2460	987	14.4	3570	7031.4	3.14337
Seychelles	930	1360	7.63	4910	7207.63	2.03272
Seychelles	1660	1330	99.7	3580	6669.7	2.42729
South Africa	453.94	471.54	200.11	876.35	2001.95	3.50171
Seychelles	2160	514	18.8	2790	5482.8	3.13353
Seychelles	1040	710	99.3	1930	3779.3	3.21073
Seychelles	1270	455	88.2	2870	4683.2	4.06289
Seychelles	981	759	275	2720	4735	3.06602
Seychelles	1310	768	43.1	5100	7221.1	2.57586
Seychelles	1440	1080	32.7	4380	6932.7	2.73445
Seychelles	842	701	22.4	3610	5175.4	3.19187
Seychelles	2100	645	21.8	3900	6666.8	3.0636
Seychelles	2290	838	99	7390	10617	3.3589
Seychelles	757	515	131	2760	4163	3.82269
Seychelles	1300	659	175	5550	7684	2.4786
Seychelles	864	292	61.5	6720	7937.5	1.60747
Seychelles	603	544	303	560	2010	1.1182
Jamaica	604.21	482.98	223.34	1558.23	2868.76	3.2777
Seychelles	1400	1100	9.51	3820	6329.51	2.71569
Seychelles	1280	619	67.4	2290	4256.4	2.83371
Seychelles	2180	916	33.5	3960	7089.5	2.26695
Seychelles	2160	1200	148	4400	7908	3.80626
Seychelles	554	214	97.3	1130	1995.3	3.12234
Seychelles	2170	517	74	2690	5451	3.18198
Seychelles	345	714	8.93	3790	4857.93	2.76873
Seychelles	2670	1740	159	4360	8929	3.98823
Seychelles	541	342	152	2060	3095	3.64063
Jamaica	952.06	970.57	51.09	1473.43	3447.14	3.07448
Seychelles	1400	568	40.2	3070	5078.2	3.20802
Seychelles	269	85.3	42.1	764	1160.4	1.61839
Seychelles	883	782	13.9	3950	5628.9	3.26794
Jamaica	919.71	886.15	105.47	1408.85	3320.18	2.47022
Seychelles	710	464	64.7	1850	3088.7	2.83867
Ghana	1044.16	1624.75	352.65	2548.61	5570.17	3.70263
Jamaica	991.24	526.06	42.43	1332.29	2892.02	3.11839
Seychelles	2600	917	109	4000	7626	3.35317
Seychelles	1570	675	61	3590	5896	3.17041
Ghana	1896.45	1219	131.19	3894.37	7141.01	2.97801
Jamaica	731	2037.21	13.38	1914.82	4696.41	3.00814
Seychelles	848	409	123	2320	3700	3.17504
Seychelles	945	433	96.8	2430	3904.8	3.6872
Seychelles	2110	671	17	3360	6158	3.71109
South Africa	310.51	655.55	302.21	692.21	1960.48	4.59084
Seychelles	1030	333	125	2410	3898	3.65727
Jamaica	991.98	2053.25	16.37	2000.23	5061.84	3.34083
Jamaica	811.96	938.69	94.08	1953.78	3798.51	3.074
Jamaica	435.46	446.7	149.91	1024.99	2057.05	4.20345
Jamaica	700.87	681.93	119.92	862.87	2365.59	3.0056
Seychelles	713	211	155	2050	3129	3.23581
Seychelles	1130	619	273	2180	4202	3.93052
Jamaica	1213.78	1295.26	202.68	1806.95	4518.67	3.3474
Jamaica	NA	NA	NA	NA	NA	2.3647
Seychelles	1540	837	241	2650	5268	3.66795
Seychelles	2230	1020	45.3	4620	7915.3	3.29438
Jamaica	1365.89	2103.6	163.34	2204	5836.82	3.26478
Seychelles	2090	1810	18.5	5230	9148.5	3.29285
South Africa	463	465.17	152.2	476.46	1556.83	3.76551
South Africa	804.56	836.03	268.83	1154.14	3063.56	4.19199
South Africa	1606.91	1572.7	258.38	1526.77	4964.75	3.8554
South Africa	1003.81	1055.21	153.47	1631.65	3844.14	3.80478
Seychelles	2200	1610	126	4900	8836	3.40144
South Africa	934.68	1310.43	350.62	934.34	3530.08	4.01272
South Africa	1092.71	1055.86	252.04	1083.57	3484.18	4.06099
Jamaica	1462.37	1933.66	16.5	1829.42	5241.96	3.77031
Jamaica	622.14	720.62	62.45	902.27	2307.48	2.98378
Seychelles	201	398	45.9	877	1521.9	3.87274
Seychelles	1340	473	49.9	3600	5462.9	3.68799
Seychelles	1720	1150	112	5000	7982	3.22078
Jamaica	999.19	1651.18	84.09	1064.39	3798.84	2.97928
Seychelles	974	485	52.4	3790	5301.4	2.26491
Seychelles	628	466	1.39	2960	4055.39	3.28038
Jamaica	885.89	880	173.55	1459.64	3399.08	3.16642
Jamaica	363.93	285.35	121.04	939.43	1709.74	3.63871
Jamaica	1247.97	1500.15	350.62	2485.68	5584.42	1.71951
Jamaica	381.86	704.57	107	903.62	2097.05	3.18277
Seychelles	915	399	74.5	2190	3578.5	3.23787
Seychelles	2220	661	44.6	3010	5935.6	3.61895
Jamaica	443.04	415.71	128.32	940.18	1927.25	2.69141
Seychelles	5620	2460	70.1	5910	14060.1	2.41677
Jamaica	1263.31	2418.18	606.46	2046.67	6334.62	2.99488
Seychelles	1500	757	60.3	4610	6927.3	2.77837
Seychelles	739	309	120	2020	3188	3.16632
Seychelles	1270	564	55	5630	7519	3.35634
Seychelles	1180	502	91.7	2870	4643.7	3.53436
Seychelles	2560	890	140	4680	8270	3.49399
Jamaica	1381.23	1025.31	120.63	1835.41	4362.58	3.14961
Jamaica	188.53	576.41	116.76	668.69	1550.38	1.88082
Seychelles	2300	1260	41.2	4560	8161.2	3.61126
Jamaica	1235.03	1173.7	70.97	2055.66	4535.36	1.83044
Jamaica	859.09	1188.43	306.8	1082.07	3436.38	3.50602
Jamaica	794.77	692.7	145.63	927.3	2560.39	2.2078
Jamaica	830.07	726.77	112.93	1391.47	3061.24	3.4769
Jamaica	210.34	6.22	45.33	784.21	1046.1	3.96938
Jamaica	2205.02	2578.66	149.37	3146.42	8079.47	2.24011
Jamaica	511.79	526.06	159.9	1109.19	2306.94	3.27608
Jamaica	2899.98	1930.81	24.05	3020.57	7875.4	3.68618
Jamaica	295.54	21.1	168.08	150.58	635.3	1.86461
Jamaica	551.35	434.83	179.85	935.54	2101.56	3.31479
Jamaica	581.29	521.89	131.28	1314.31	2548.76	3.24294
Jamaica	2776.14	1331.54	94.77	2455.71	6658.15	0.821879
Jamaica	357.28	408.45	83.76	807.88	1657.37	3.33517
Jamaica	317.17	211.48	109.47	798.89	1437.01	3.34322
Jamaica	1021.18	1698.66	28.56	1877.37	4625.78	3.21345
Seychelles	NA	NA	NA	NA	NA	2.91418
Seychelles	NA	NA	NA	NA	NA	3.83931
Seychelles	NA	NA	NA	NA	NA	2.43326
Seychelles	NA	NA	NA	NA	NA	3.30256
Seychelles	NA	NA	NA	NA	NA	2.98788
Seychelles	NA	NA	NA	NA	NA	1.36546
Seychelles	NA	NA	NA	NA	NA	3.1768
Seychelles	NA	NA	NA	NA	NA	1.96579
Jamaica	659.29	889.01	349.1	1281.49	3178.89	3.697
Jamaica	423.44	547.17	1.66	1875.87	2848.14	1.89945
Jamaica	723.05	1006.84	116.17	1550.74	3396.8	2.69883
Jamaica	1273.29	1410.68	208.92	1550.74	4443.63	3.135
Jamaica	3665.17	1811	133.24	3122.45	8731.86	3.34638
Jamaica	524.55	364.71	149.45	983.48	2022.18	2.66413
Jamaica	347.48	335.69	39.11	981.68	1703.97	2.81038
Jamaica	1156.29	801.52	205.3	1977.75	4140.87	2.21191
Jamaica	494.79	490.01	130.16	1057.8	2172.76	2.47726
Jamaica	360.05	298.1	84.8	761.28	1504.23	3.30282
Jamaica	1548.87	735.57	129.42	1505.79	3919.65	2.63866
Jamaica	1013.61	486.27	15.22	1534.26	3049.36	2.44732
Jamaica	894.94	577.94	105.65	864.37	2442.9	2.61733
Jamaica	2983.15	1171.5	23.77	2463.2	6641.62	2.94635
Jamaica	468.73	290.18	67.07	729.67	1555.65	2.5306
South Africa	541.55	506.28	92.8	574.45	1715.08	3.1403
USA	322.71	216.3	78.79	284.98	902.77	3.16661
South Africa	1393.98	789.43	69.62	1414.09	3667.12	3.67536
South Africa	769.63	517.49	190.93	1318.65	2796.7	4.00893
South Africa	867.22	378.77	67.55	723.08	2036.62	3.69115
USA	1987.57	1614.62	120.31	3975.44	7697.93	3.63931
South Africa	1181.99	710.72	61.36	1385.93	3339.99	3.10334
South Africa	2600.55	1823.09	289.47	2021.2	6734.31	3.68627
South Africa	662.8	380.97	155.39	898.23	2097.39	4.41102
South Africa	1035.23	921.77	125.78	1175.86	3258.64	3.50206
USA	428.18	276.31	78.23	1414.52	2197.25	3.28243
South Africa	892.54	382.95	112.81	1035.32	2423.62	3.07401
USA	484.48	393.72	85.53	1271.6	2235.34	2.34733
South Africa	1008.8	1125.33	67.63	736.26	2938.02	2.8282
South Africa	591.27	1003.32	136.48	1269.96	3001.03	3.05871
South Africa	1131.71	725.89	98.87	1616.66	3573.14	3.85636
South Africa	201.83	167.45	49.99	294.42	713.69	3.65535
South Africa	1213.41	928.8	117.37	1374.99	3634.56	3.18596
South Africa	900.67	648.29	341.45	1552.24	3442.65	4.15721
South Africa	690.89	672.03	209.69	1170.32	2742.93	3.69137
South Africa	1806.71	2552.28	181.07	2367.31	6907.37	3.49538
USA	1872.37	3105.88	94.57	5383.66	10456.5	3.35543
South Africa	535.82	463.63	85.24	885.19	1969.88	4.3495
South Africa	856.69	1447.17	389.36	1580.7	4273.92	3.46079
South Africa	1320.98	753.15	78.87	934.94	3087.93	3.90226
South Africa	1459.41	929.02	53.56	1574.71	4016.71	4.44864
USA	1709.12	725.45	148.63	1735.03	4318.23	2.83708
South Africa	1222.65	1385.84	108.04	1405.55	4122.08	3.69295
USA	387.4	410.87	167.67	1005.66	1971.6	4.07421
South Africa	1533.53	549.59	30.86	1435.22	3549.19	3.39008
South Africa	2363.97	1281.85	90.28	1472.98	5209.08	3.6266
USA	661.87	502.98	303.99	830.36	2299.21	3.16561
South Africa	2506.29	1399.69	173.02	1985.24	6064.24	2.95913
South Africa	284.64	607.62	121.01	942.43	1955.7	3.65471
South Africa	1333.55	1098.51	162.47	1925.31	4519.84	3.05426
South Africa	1311.92	525.4	57.05	1457.84	3352.22	3.98784
USA	796.36	354.03	46	1963.1	3159.49	3.83082
USA	1346.11	916.27	216.31	1471.63	3950.32	3.25814
South Africa	260.24	648.73	40.24	1114.28	2063.49	2.99435
South Africa	3454.47	413.29	27.47	1941.79	5837.02	3.29322
South Africa	559.85	545.63	261.18	1094.21	2460.87	4.21929
South Africa	1911.14	2257.7	430.38	2527.63	7126.85	2.84963
USA	474.27	390.65	202.53	1009.85	2077.3	3.62636
USA	484.81	43.62	105.19	787.36	1420.97	2.41329
South Africa	2158.81	898.24	29.43	1361.2	4447.69	4.33903
South Africa	1398.05	1717.79	33.99	1155.49	4305.32	3.78984
USA	541	404.06	166.29	717.09	1828.43	3.48541
South Africa	463.37	598.61	61.46	935.24	2058.68	3.33162
South Africa	483.7	128.05	21.32	1147.55	1780.62	2.15732
South Africa	485.73	2341.24	392.92	1992.74	5212.63	4.01109
South Africa	1285.12	726.11	170.37	2006.22	4187.82	3.17414
USA	657.81	840.21	144.33	1461.59	3103.93	2.33176
South Africa	3036.75	2068.2	125.11	2305.88	7535.95	3.68754
South Africa	3800.1	1612.49	47.73	2433.23	7893.54	3.13473
South Africa	1682.32	1136.32	46.3	1583.7	4448.64	3.36348
USA	872.58	1271.52	150.77	1733.53	4028.41	2.628
South Africa	156.37	46.32	1.08	803.24	1007.01	2.14246
USA	1623.36	1634.25	218.96	1835.41	5311.98	2.93145
South Africa	1795.99	1224.7	144.51	1916.32	5081.51	3.45539
USA	2158.81	2719.35	479.05	2755.37	8112.58	3.64082
South Africa	1048.91	832.29	131.74	1610.67	3623.61	4.02471
USA	563.55	688.52	223.04	602.62	2077.72	3.32446
South Africa	318.28	905.72	156.35	1146.2	2526.55	3.5528
South Africa	599.96	547.17	99.79	968.5	2215.41	3.64903
South Africa	1348.89	797.78	119.43	2741.88	5007.98	1.72113
South Africa	687.2	874.5	144.17	1403.01	3108.88	3.72732
USA	1353.51	1001.57	232.52	1973.26	4560.85	3.42678
South Africa	1458.86	1121.38	287.43	3243.81	6111.48	2.98459
South Africa	159.62	745.68	258.38	1094.81	2258.48	3.71226
South Africa	778.13	714.68	167.31	864.07	2524.19	3.66276
South Africa	2343.64	997.83	25.99	2242.95	5610.41	2.71872
USA	716.4	457.48	155.31	1113.38	2442.57	2.90501
South Africa	647.09	677.53	100.6	1079.82	2505.04	3.93651
South Africa	1516.9	552.22	39.04	1316.7	3424.86	2.97944
USA	761.87	1561.7	99.53	1345.92	3769.02	3.30375
South Africa	1496.38	364.27	271.12	2578.57	4710.34	2.58316
South Africa	2092.27	1047.29	55.78	2241.45	5436.79	4.26152
South Africa	1066.1	897.8	205.13	1618.16	3787.19	3.69325
South Africa	1890.81	857.57	34.25	1414.69	4197.32	3.25024
USA	1337.61	1423.65	200.39	2962.13	5923.78	2.85631
South Africa	1652.19	732.71	129.88	1794.96	4309.74	3.20829
South Africa	821.75	716.66	154.09	1147.1	2839.6	4.04492
South Africa	585.91	261.82	41.25	622.84	1511.83	4.00133
USA	858.16	371.3	147.92	1817.43	3194.82	1.66575
South Africa	670.01	1376.16	140.78	1302.17	3489.13	3.67402
South Africa	2404.63	657.96	27.34	1757.5	4847.44	2.95692
USA	1020.81	2218.13	33.51	2725.4	5997.85	3.5341
USA	1365.71	921.55	11.54	2599.55	4898.34	1.70739
South Africa	400.16	154.92	36.64	667.64	1259.36	3.5119
South Africa	745.97	600.15	41.33	1122.82	2510.28	3.05029
South Africa	498.86	623.67	59.19	922.65	2104.37	2.85692
South Africa	899.57	665.88	366.42	1637.64	3569.51	4.33811
USA	1160.36	742.82	259.66	1194.74	3357.58	2.90819
South Africa	1169.6	841.97	152.58	1081.02	3245.17	4.04003
USA	290.18	113.1	90.05	504.33	997.67	3.1412
South Africa	2016.49	1962.46	346.04	1940.3	6265.29	4.32047
USA	1044.84	913.63	32.57	1649.63	3640.66	3.8264
South Africa	974.05	598.39	42.25	1265.01	2879.7	3.16995
South Africa	818.43	946.39	244.85	1040.42	3050.08	4.44627
South Africa	1097.89	2794.1	70.07	1847.4	5809.46	3.13183
South Africa	1420.42	1268.66	208.77	1301.12	4198.97	4.31657
USA	664.65	1169.96	284.12	1333.04	3451.76	3.38175
USA	60.11	23.46	22.78	134.05	240.39	3.9576
USA	456.71	410.43	77.59	697.76	1642.49	3.86789
South Africa	1023.03	880	118.69	1291.38	3313.1	2.73358
South Africa	629.16	480.78	161.27	800.54	2071.75	4.34637
USA	232.89	293.04	138.34	720.98	1385.24	3.3679
South Africa	782.57	621.91	143.41	1248.38	2796.27	1.79806
USA	2277.1	2369.82	233.28	3612.4	8492.59	2.93071
South Africa	3182.77	1518.84	34.12	1441.66	6177.38	2.72799
USA	885.7	1316.81	40.34	1708.06	3950.91	3.29275
South Africa	300.9	209.5	82	502.38	1094.78	3.64423
South Africa	1050.39	640.82	133.09	1213.47	3037.76	3.72084
USA	940.23	1213.27	141.63	1268.91	3564.03	3.43696
South Africa	627.31	730.73	336.35	1406.9	3101.3	4.31359
South Africa	1825.75	1460.8	98.21	1552.24	4936.99	3.60878
South Africa	862.23	291.5	34.2	749.45	1937.38	3.69516
South Africa	1337.61	2818.28	164.89	2695.44	7016.22	3.55616
South Africa	1021.92	1266.03	200.59	1627.15	4115.69	4.10917
South Africa	603.28	676.87	99.22	1200.89	2580.26	3.24286
South Africa	702.72	2268.69	45.36	2460.2	5476.97	2.58531
South Africa	1440.19	632.46	46.27	1438.37	3557.3	3.70822
South Africa	976.45	930.78	208.21	1067.54	3182.98	3.4822
South Africa	358.38	226.65	70.63	403.79	1059.46	3.39075
South Africa	2443.45	1104.67	81.41	2079.64	5709.17	3.70268
South Africa	1052.05	1310.65	188.21	2364.31	4915.22	2.93703
South Africa	509.58	1140.94	297.37	816.87	2764.76	3.2366
South Africa	2195.78	1328.02	104.78	2204	5832.57	3.22836
South Africa	338.98	217.37	71.4	490.99	1118.74	3.87203
South Africa	921.19	411.31	152.86	995.77	2481.13	2.04924
South Africa	1107.68	961.78	47.19	1995.73	4112.38	3.56375
South Africa	497.93	1146	169.53	1519.27	3332.73	3.80058
South Africa	417.35	356.79	85.9	645.47	1505.5	3.15198
South Africa	1143.73	701.93	77.16	1234.45	3157.26	4.22519
South Africa	244.34	309.31	45.64	416.98	1016.27	3.36141
South Africa	57.56	15.73	36.64	236.28	346.21	4.43441
South Africa	435.46	1291.09	268.32	1374.84	3369.7	2.99282
South Africa	1051.31	911.21	43.93	886.99	2893.45	3.67269
USA	721.39	1395.73	46.73	1052.1	3215.96	3.26568
South Africa	1874.17	1807.04	306.03	2292.4	6279.64	2.86778
South Africa	489.8	327.33	45.54	976.29	1838.96	3.10604
USA	1116.19	1357.7	90.94	1394.77	3959.59	3.07998
South Africa	1604.14	1630.95	335.59	1679.59	5250.27	3.92579
South Africa	597.92	475.06	124.32	1295.88	2493.19	3.97611
South Africa	949.65	691.16	200.87	1782.97	3624.66	2.6829
South Africa	498.86	314.58	92.57	1028.43	1934.44	4.12874
South Africa	381.86	595.09	158.62	910.07	2045.64	3.62357
South Africa	878.68	863.73	137.75	1377.53	3257.7	4.34455
South Africa	288.15	248.63	137.42	754.84	1429.05	3.20394
South Africa	1125.8	688.96	150.29	1417.84	3382.89	4.01961
South Africa	1171.08	660.16	47.68	1172.87	3051.79	3.24037
South Africa	845.78	864.39	180.51	1150.39	3041.07	3.97266
South Africa	306.45	306.89	79.12	407.09	1099.54	4.47161
South Africa	604.95	847.46	128.55	977.79	2558.75	3.79814
South Africa	1924.08	1090.6	56.59	1637.64	4708.91	3.83296
South Africa	506.43	938.25	17.95	1839.91	3302.55	2.8999
South Africa	1581.4	388.23	45.61	1385.03	3400.27	3.96356
South Africa	1905.59	1316.59	126.85	1505.79	4854.82	4.18904
South Africa	1571.61	2065.34	371.77	1893.85	5902.57	3.39271
South Africa	870.36	1443.87	259.4	1669.1	4242.74	4.01339
South Africa	626.57	635.32	116.58	839.8	2218.27	3.94079
South Africa	1014.71	606.96	66.68	1047.31	2735.67	3.63257
South Africa	1480.3	993.43	29.46	1355.21	3858.4	2.17001
South Africa	1180.14	1104.45	74.71	1163.43	3522.72	3.89033
South Africa	695.88	660.38	158.6	1230.85	2745.71	3.70157
South Africa	2253.07	894.07	252.57	1679.59	5079.3	3.37655
South Africa	1505.07	1447.17	172.41	1576.21	4700.85	3.59202
South Africa	1388.62	1095.65	127.08	1838.41	4449.77	3.85421
South Africa	264.68	135.86	24.92	508.82	934.28	3.63247
South Africa	1624.65	664.12	49.66	1345.02	3683.46	3.89284
South Africa	1348.15	917.59	19.88	1522.27	3807.89	3.52578
South Africa	621.4	638.62	138.87	889.54	2288.43	4.19868
South Africa	1480.49	1272.62	427.58	1911.83	5092.51	2.39274
South Africa	2635.67	1500.81	213.31	2382.29	6732.08	3.79094
South Africa	475.38	497.05	132.55	788.7	1893.69	4.19819
South Africa	1126.91	884.39	197.51	1310.26	3519.07	3.44446
South Africa	1221.91	494.19	38.96	1050.16	2805.21	3.22924
USA	1112.67	2040.5	536.89	1706.56	5396.63	3.08552
South Africa	701.06	832.95	110.44	1094.51	2738.95	3.61076
South Africa	2935.09	1201.4	150.31	1860.89	6147.69	4.11396
South Africa	418.82	359.43	125.37	673.48	1577.11	3.33591
USA	741.91	667.64	141.37	992.92	2543.84	3.09588
USA	1138.37	2080.29	280.81	1666.11	5165.57	3.47883
USA	224.94	290.62	80.09	384.91	980.56	3.56958
South Africa	991.61	1068.18	322.34	1516.28	3898.4	4.21229
South Africa	275.4	466.49	193.74	461.33	1396.95	3.56627
South Africa	276.69	402.08	90.13	764.58	1533.48	3.21891
Ghana	1560	1810	40.3	4360	7770.3	3.98832
South Africa	1275.69	912.53	58.71	1556.73	3803.67	2.68432
Ghana	2170	1160	31.5	4910	8271.5	4.54116
Ghana	2650	1230	238	4670	8788	4.02769
Ghana	4920	1650	56.7	6470	13096.7	3.60839
Ghana	3450	1150	43.2	5470	10113.2	4.02023
Ghana	541	194	107	1510	2352	3.97177
Ghana	4320	1320	29.4	6220	11889.4	2.22848
Ghana	3680	1040	103	4480	9303	3.72348
Ghana	2310	1580	280	4860	9030	3.49449
Ghana	2750	1760	77.6	4150	8737.6	3.43897
Ghana	1360	558	11.6	1600	3529.6	3.37656
Ghana	4060	1820	34.4	6220	12134.4	3.35378
Ghana	3830	1940	43.1	5340	11153.1	3.99604
Ghana	1960	913	204	3970	7047	4.18763
Ghana	2940	1110	56.8	4430	8536.8	3.73011
Ghana	2090	564	27	3180	5861	3.28524
Ghana	953	2760	5.11	4830	8548.11	3.44925
Ghana	1260	1940	40.4	5070	8310.4	3.14875
Ghana	2360	658	0.73	5090	8108.73	3.18281
Ghana	2840	678	8.47	2120	5646.47	3.42124
Ghana	2220	899	16	4540	7675	2.47404
Ghana	2660	883	39.9	4270	7852.9	3.16059
Ghana	5020	1560	180	6310	13070	4.59525
Ghana	1080	686	57.5	3410	5233.5	4.35118
Ghana	1680	1140	205	5520	8545	3.88445
Ghana	2740	2100	49.1	5850	10739.1	3.76714
Ghana	3210	1480	49	4450	9189	3.77981
Ghana	2900	1820	29.8	4840	9589.8	3.81109
USA	1711.34	1077.41	205.76	2141.07	5135.58	3.63536
USA	202.76	165.16	55.5	481.25	904.67	3.40771
Ghana	3330	1600	50.7	6200	11180.7	3.15339
USA	611.97	415.93	129.88	699.85	1857.63	2.83891
Ghana	5390	1880	61.3	5890	13221.3	3.97972
Ghana	1440	742	170	3130	5482	3.98155
Ghana	1180	630	134	3070	5014	4.06448
Ghana	2430	1480	71.4	4190	8171.4	3.60048
Ghana	933	491	167	2230	3821	3.92102
South Africa	584.62	310.63	76.75	874.71	1846.7	3.93533
Ghana	5390	1440	22.8	5190	12042.8	3.07458
Ghana	1560	960	93.1	4980	7593.1	4.07395
Ghana	2950	2170	22.8	5320	10462.8	3.89553
Ghana	5010	1450	78.9	6440	12978.9	4.05137
Ghana	5150	2270	367	5390	13177	3.94335
Ghana	4070	1360	93.3	4970	10493.3	4.25526
Ghana	4070	1790	360	5580	11800	4.03744
Ghana	3670	1560	113	5480	10823	2.85018
Ghana	1800	1200	53.8	4140	7193.8	3.20963
Ghana	1150	431	176	3500	5257	4.23751
Ghana	793	360	118	2000	3271	4.33573
Ghana	1610	690	2.4	3230	5532.4	3.54058
Ghana	1980	868	114	4910	7872	4.35658
Ghana	1360	803	76.4	3630	5869.4	4.40562
Ghana	1440	1140	252	3670	6502	4.18737
Ghana	1870	807	134	5630	8441	4.06096
Ghana	2460	1550	107	6030	10147	3.33511
Ghana	3600	1360	101	5200	10261	3.83074
Ghana	3070	1430	62.7	8100	12662.7	3.95692
Ghana	1670	154	12.4	2280	4116.4	1.64611
Ghana	3430	1090	81.3	4240	8841.3	4.22859
Ghana	2270	545	11.2	2310	5136.2	3.42905
Ghana	4380	2200	50.4	5210	11840.4	3.6948
Ghana	2890	1140	42.5	4850	8922.5	3.8285
USA	1925.92	1137.86	111.51	2352.33	5527.62	3.25453
USA	374.65	515.73	130.01	549.73	1570.11	3.86482
Ghana	1600	941	127	4720	7388	4.62713
Ghana	1810	902	83.2	4580	7375.2	3.38869
Ghana	3740	1990	54.5	5410	11194.5	4.05048
Ghana	4390	1980	46.1	4900	11316.1	3.89215
Ghana	1870	480	41.8	3470	5861.8	3.90802
Ghana	1660	621	130	3810	6221	3.80846
Ghana	3950	1040	59.6	4610	9659.6	3.53543
Ghana	2330	1180	55.5	5090	8655.5	3.65359
Ghana	983	697	178	2500	4358	4.00737
Ghana	2450	1060	179	4600	8289	4.35387
USA	321.79	488.47	112.04	531.3	1453.6	3.67887
Ghana	1480	687	139	3460	5766	3.99314
Ghana	1270	1380	109	4340	7099	4.25622
Ghana	4590	607	68.4	6020	11285.4	3.29199
Ghana	3210	2250	63.8	6450	11973.8	3.90417
Ghana	2020	1050	142	4800	8012	4.08994
Ghana	1853.48	1511.53	158.91	4557.95	8081.87	4.37899
USA	1071.83	2068.64	25.74	1875.87	5042.07	3.49121
Ghana	1918.3	4160.55	110.56	4825.18	11014.6	3.55348
Ghana	2749.85	1606.69	51.88	5903.11	10311.5	4.49901
Ghana	569.3	1403.15	3.96	4284.71	6261.13	3.18928
Ghana	3680	2110	46.4	4710	10546.4	3.35964
USA	844.3	913.19	146.42	1250.63	3154.54	3.80002
Ghana	2102.39	2259.14	119.7	5786.01	10267.2	3.58493
USA	930.25	454.84	174.42	896.88	2456.39	3.58408
USA	499.22	1521.47	361.58	970.75	3353.03	3.66789
Ghana	2350	794	125	4190	7459	4.45866
Ghana	1777.55	1441.04	182.91	4957.29	8358.8	3.73174
Ghana	2014.98	2231.83	163.15	6344.49	10754.5	3.72248
Ghana	1140	756	158	3960	6014	3.84306
Ghana	992.67	1433.55	314.56	4359.78	7100.56	4.4805
Ghana	4490	2030	15.5	4960	11495.5	3.58035
USA	424.55	263.14	6.33	1040.57	1734.6	2.09289
USA	946.33	805.25	109.8	941.98	2803.36	3.48323
Ghana	738	518	193	2400	3849	4.1036
USA	606.43	584.76	132.33	654.76	1978.27	2.36429
Ghana	2980	1820	227	5120	10147	4.16464
USA	1546.65	1460.58	51.06	2000.23	5058.53	3.69452
Ghana	2930	1590	44.7	6440	11004.7	4.20245
Ghana	1340	588	196	3230	5354	3.60288
Ghana	2360	1070	61	4490	7981	4.20458
Ghana	2534.65	2165.74	141.09	4669.04	9510.53	4.02218
Ghana	4000	1780	58.5	5850	11688.5	3.81492
Ghana	1922.75	1634	45.73	5858.07	9460.55	4.30332
Ghana	1950	1550	128	5750	9378	4.30298
Ghana	2655.4	2252.53	114.33	4963.3	9985.56	3.72225
Ghana	2354.63	1951.64	74.81	5158.47	9539.55	4.45297
Ghana	1511.97	1000.49	155.95	3011.61	5680.02	3.88389
USA	882.93	951.66	157.14	2105.11	4096.85	3.15027
Ghana	1880	1450	381	3400	7111	4.39617
Ghana	3376.2	4440.74	28.86	5990.19	13836	3.56571
Ghana	903	475	44.6	2560	3982.6	3.54275
Ghana	4126.26	3126.14	81.35	6836.92	14170.7	3.89878
USA	1041.7	289.3	126.03	1242.24	2699.27	3.35226
Ghana	1644.21	1437.96	40.35	5338.62	8461.13	3.98396
Ghana	993.04	924.71	306.24	3422.96	5646.96	4.25215
Ghana	2180.92	2547.26	103.41	7272.3	12103.9	3.72553
Ghana	1489.75	1091.24	102.33	4317.74	7001.06	3.81416
Ghana	585.23	298.78	198.08	3059.65	4141.74	4.72991
Ghana	3132.1	2671.05	148.6	6518.64	12470.4	3.54848
Ghana	547	373	94.1	1850	2864.1	4.00913
Ghana	1532.34	1879.39	18.44	5659.9	9090.07	3.30705
Ghana	3640	1860	39.5	5550	11089.5	3.6624
Ghana	475.96	505.31	143.29	2281.38	3405.94	4.40263
USA	777.02	893.41	34.5	1567.22	3272.15	3.19421
USA	661.69	580.14	111.3	678.88	2032.01	2.73403
Ghana	2015.35	3549.51	134.91	6887.96	12587.7	4.14722
Ghana	1566.42	1533.55	336.72	3807.3	7244	3.79135
Ghana	1156.02	1805.81	185.47	5359.64	8506.94	4.57932
Ghana	1797.92	2268.39	64.5	4987.32	9118.13	3.96404
Ghana	2823.19	2298.79	113.16	6281.44	11516.6	4.52943
Ghana	3592.88	1768.37	104.48	5644.89	11110.6	2.54624
Ghana	3940	1700	26.5	5200	10866.5	3.37413
Ghana	1866.45	2373.24	114.95	5062.38	9417.02	3.89759
Ghana	2043.5	2636.69	75.37	4894.24	9649.8	4.00342
Ghana	2362.78	606.64	35.46	5278.57	8283.45	3.73066
Ghana	2940	1400	29.6	4890	9259.6	3.5627
Ghana	1617.17	1993.05	218.46	5059.38	8888.05	3.43977
Ghana	1534.94	480.2	37.3	3425.97	5478.4	2.42335
Ghana	790.8	692.54	116.48	3410.95	5010.78	4.45554
Ghana	2677.99	1579.37	58.16	5134.45	9449.97	3.4164
Ghana	2074.98	1979.39	106.98	6047.24	10208.6	3.63857
Ghana	1729.77	2091.29	42.63	3993.46	7857.15	3.44516
Ghana	2272.77	1059.96	63.73	5188.49	8584.96	2.7891
Ghana	3580	1260	76	5770	10686	3.51947
Ghana	2690	2070	16.4	5020	9796.4	3.48953
Ghana	213	1650	878	860	3601	3.46875
Ghana	2040	786	69.3	3890	6785.3	4.20067
Ghana	4730	2910	50.6	7740	15430.6	3.99506
Ghana	1450	735	49.2	3310	5544.2	3.74948
Ghana	1349	844.97	236.33	4164.61	6594.91	3.26267
Ghana	806.73	1468.79	82.88	3627.14	5985.54	3.56896
Ghana	2095.35	1603.6	173.88	4335.75	8208.59	4.15834
Ghana	2617.99	1523.42	23.48	5101.42	9266.31	2.95533
Ghana	1822.74	1761.76	231.32	5188.49	9004.32	3.98366
Ghana	2840	1100	78.1	4070	8088.1	3.38108
Ghana	1430.48	1347.2	24.14	4206.64	7008.47	2.85562
Ghana	3929.94	3720	38.02	6404.55	14092.5	3.27128
Ghana	1493.45	1219.88	233.16	4359.78	7306.27	4.19631
Ghana	1600.5	2023.45	333.76	4846.2	8803.9	4.24918
Seychelles	1980	1090	203	3830	7103	3.9561
Seychelles	1390	699	69.5	4840	6998.5	3.47083
Seychelles	1410	395	177	5970	7952	1.24645
Seychelles	1120	309	89.6	2160	3678.6	3.48335
Ghana	1060	418	75.1	3180	4733.1	3.96966
Seychelles	1040	771	208	2770	4789	3.60293
Seychelles	1870	840	24.9	4240	6974.9	4.1379
Seychelles	796	255	105	2070	3226	4.23157
Seychelles	NA	NA	NA	NA	NA	2.89053
Seychelles	320	88.6	58.6	970	1437.2	4.19696
Seychelles	12.4	107	162	44.5	325.9	2.44447
Ghana	2110	595	135	4870	7710	4.4266
Seychelles	4480	382	16.6	3840	8718.6	3.02407
Seychelles	798	431	61.4	8590	9880.4	1.31913
Ghana	2960	1240	110	4630	8940	4.04585
Seychelles	3260	948	36.2	3590	7834.2	3.39383
Seychelles	846	462	122	3110	4540	2.9965
Seychelles	1390	861	17.1	6600	8868.1	1.92361
Seychelles	2440	1250	38	4540	8268	3.04117
Seychelles	1280	226	6.07	2490	4002.07	3.30557
Seychelles	945	646	292	2860	4743	3.29554
Seychelles	1480	681	55.5	2840	5056.5	3.4624
Seychelles	1020	500	135	2240	3895	3.49022
Seychelles	1020	772	414	2540	4746	3.70488
Seychelles	1020	438	147	2710	4315	2.69019
Seychelles	1700	620	65.3	5170	7555.3	3.41589
Seychelles	895	812	76.9	4940	6723.9	2.52269
Seychelles	1040	372	42.4	5300	6754.4	2.36066
Seychelles	493	251	214	2090	3048	4.02506
Seychelles	24.1	400	162	561	1147.1	2.81391
Seychelles	23	74.8	164	61.6	323.4	1.57818
Seychelles	1260	1060	111	5930	8361	2.53932
Seychelles	1340	676	21.4	2970	5007.4	3.64181
Seychelles	2890	1020	45.1	6830	10785.1	2.86094
Seychelles	845	656	83.6	4690	6274.6	2.94348
Seychelles	1060	647	137	4330	6174	2.88725
Seychelles	4700	177	8.06	4030	8915.06	2.26741
Seychelles	351	255	31	719	1356	1.07681
Ghana	989.71	1324.73	241.69	3311.87	5868	3.81945
Ghana	1730.51	1781.58	113.62	3597.11	7222.83	3.50055
Seychelles	1050	646	125	4150	5971	1.54357
Seychelles	1420	878	59.6	5060	7417.6	2.77803
Seychelles	1220	328	92.8	1840	3480.8	3.67353
Seychelles	3660	883	34.8	4360	8937.8	2.81135
Seychelles	1430	746	258	4490	6924	2.66782
Ghana	3082.47	2015.08	78.03	4969.3	10144.9	3.1873
Seychelles	645	527	172	166	1510	2.82718
Ghana	3089.88	2801.46	58.57	5359.64	11309.5	2.93309
Seychelles	3400	818	61	4780	9059	3.7623
Seychelles	3190	778	59.8	4000	8027.8	2.83652
Ghana	1498.64	1553.38	288.21	4587.97	7928.2	4.67369
Ghana	181.68	741.01	43.17	897.78	1863.63	2.87089
Ghana	1854.22	1621.66	104.12	3471.01	7051.01	3.73772
Ghana	495.22	840.13	46.73	1276.41	2658.49	4.17049
Ghana	775.25	655.1	154.06	2234.84	3819.24	4.18258
Seychelles	646	318	97	1690	2751	2.76705
Ghana	2354.26	1942.83	80.43	3825.31	8202.83	3.68202
Seychelles	2310	1190	24.8	5930	9454.8	2.5453
Seychelles	979	357	103	3830	5269	2.23438
Ghana	998.97	1030.89	230.81	2927.54	5188.2	4.11393
Ghana	1514.2	1608.01	83.08	3744.24	6949.53	3.60031
Ghana	1324.18	952.03	83.08	2554.31	4913.6	3.68733
Ghana	1632.35	1650.3	14.15	3095.68	6392.48	2.95475
Ghana	2509.46	2432.72	104.94	3870.35	8917.47	3.32363
Ghana	1936.08	1980.27	118.11	5086.4	9120.87	3.53331
Ghana	1716.06	2452.1	115.71	5783.01	10066.9	4.38832
Ghana	1563.83	2477.21	425.12	2950.96	7417.11	3.76485
Ghana	4010	1370	51.1	4730	10161.1	3.43016
Ghana	1119.35	1503.6	65.11	4314.74	7002.79	3.39495
Ghana	2032.76	2270.15	77.67	4101.55	8482.13	3.75865
Ghana	1844.59	3027.02	276.98	4590.98	9739.56	3.49043
Ghana	NA	NA	NA	NA	NA	3.13782
Ghana	1665.32	1781.58	240.52	4170.61	7858.03	4.18134
Ghana	1686.8	1293.9	113.93	4870.22	7964.84	4.18943
Ghana	1001.93	1080.23	268.4	2150.46	4501.02	4.19503
Ghana	512.26	867.44	198.59	1989.52	3567.82	4.12356
Ghana	2500	1220	133	5750	9603	4.43443
Ghana	1998.68	2414.21	241.28	3558.08	8212.26	4.41481
Ghana	811.92	996.52	100.04	4143.59	6052.07	4.59911
Seychelles	767	317	147	4490	5721	2.36856
Seychelles	775	675	171	2490	4111	2.54761
Seychelles	1410	1110	51.3	5960	8531.3	2.58378
Seychelles	649	187	59.2	3930	4825.2	2.18629
Seychelles	1120	414	60.8	4620	6214.8	3.43001
Seychelles	2970	442	53.4	3780	7245.4	3.18994
Seychelles	1280	446	97.4	3670	5493.4	3.43057
Seychelles	1670	483	150	7340	9643	3.79403
Ghana	1490.12	1875.86	379.11	4825.18	8570.27	3.80477
Ghana	2048.31	1847.67	139.36	4170.61	8205.95	3.02983
Ghana	1833.11	2741.54	46.21	5500.76	10121.6	4.30513
Ghana	1411.96	2011.99	128.12	4702.07	8254.15	4.53322
Seychelles	2290	1340	324	5830	9784	2.2107
Ghana	3881.79	2782.51	31.71	5410.69	12106.7	3.37803
Seychelles	1020	463	139	2160	3782	3.79395
Ghana	1496.42	1196.53	317.78	3732.23	6742.96	3.95722
Ghana	1924.23	1770.57	250.47	4068.52	8013.8	4.34959
Ghana	1350.85	1300.06	109.43	3038.63	5798.98	2.89797
Ghana	1286.03	2495.72	138.54	4059.52	7979.8	3.2875
Seychelles	1210	521	167	2130	4028	2.28794
Ghana	1203.43	3597.97	49.62	6134.31	10985.3	3.63006
Seychelles	1730	1070	76.4	3840	6716.4	3.3482
Ghana	1236.4	5828.48	59.59	6425.56	13550	3.69173
Seychelles	978	317	192	1180	2667	3.94174
Seychelles	1540	1550	111	3260	6461	3.28303
Seychelles	1040	683	35.4	5230	6988.4	2.07895
Seychelles	104	1.81	29.4	973	1108.21	1.41827
Seychelles	714	482	43.7	2420	3659.7	3.17576
Seychelles	876	516	280	2140	3812	3.70749
Seychelles	608	493	229	2260	3590	3.51433
Seychelles	404	231	59.3	1030	1724.3	3.65346
Ghana	1548.64	1273.19	303.43	3702.21	6827.47	4.23393
Ghana	1627.17	1775.42	64.85	4191.63	7659.07	3.84103
Ghana	2903.57	2321.7	111.73	4482.88	9819.88	3.66349
Seychelles	1410	952	35.7	3980	6377.7	3.14078
Ghana	3206.92	2495.72	132.41	4176.62	10011.7	3.61306
Seychelles	875	423	114	4780	6192	2.34169
Seychelles	1000	597	148	4800	6545	2.90938
Ghana	1822.74	2440.21	122.25	3600.12	7985.31	3.26815
Ghana	1781.25	1409.32	126.59	2799.32	6116.49	2.60856
Ghana	1967.94	1128.25	198.34	3912.39	7206.91	4.14872
Seychelles	1010	642	29.7	3500	5181.7	2.62388
Ghana	683.76	793.43	212.23	2199.1	3888.52	4.1503
Seychelles	1690	475	60.8	6830	9055.8	2.48212
Seychelles	1110	884	16.5	3550	5560.5	2.99089
Ghana	1116.76	1067.01	132.36	2899.01	5215.14	4.33968
Ghana	1329	1387.29	163.31	3927.4	6806.99	4.08904
Ghana	2184.62	2164.42	58.06	4648.02	9055.13	3.45542
Ghana	847.85	711.05	173.01	2467.54	4199.44	3.36436
Seychelles	3790	1050	40	4480	9360	3.18687
Jamaica	441.56	537.5	156.18	681.73	1816.95	2.89169
Ghana	1970	1200	232	3060	6462	3.52158
Ghana	3790	884	209	4050	8933	4.09106
Seychelles	2250	210	216	1050	3726	1.22362
Ghana	2510	1420	35.7	4980	8945.7	3.37626
Seychelles	1530	466	109	3420	5525	2.84967
Jamaica	1722.24	1339.67	15.96	2334.35	5412.22	2.23529
Seychelles	573	312	177	1840	2902	3.08604
Seychelles	567	240	104	2950	3861	1.50041
Seychelles	1290	266	296	3670	5522	2.99194
Seychelles	866	792	76.2	2360	4094.2	2.40037
Ghana	1108.24	1407.12	123.37	3311.87	5950.59	2.76792
Ghana	3420	1790	72.5	4950	10232.5	3.43165
Ghana	1227.51	901.81	187.1	3386.93	5703.35	3.53031
Jamaica	1176.81	762.83	68.39	1706.56	3714.59	2.0346
Seychelles	1310	552	225	2410	4497	4.03597
Seychelles	1570	928	57.8	5570	8125.8	3.0469
Jamaica	NA	NA	NA	NA	NA	3.38665
Seychelles	1450	660	115	2950	5175	3.30933
Seychelles	925	792	27	4250	5994	2.71956
Jamaica	644.13	1038.28	15.22	885.49	2583.13	2.46059
Jamaica	736.18	682.37	195.57	919.51	2533.62	2.6036
Jamaica	993.64	753.59	13.32	1450.8	3211.36	2.27131
Seychelles	1830	630	39.9	4510	7009.9	2.38898
Seychelles	778	248	175	3260	4461	3.6401
Seychelles	1460	488	88.8	4790	6826.8	2.37734
Seychelles	1160	599	61.6	3980	5800.6	2.64826
Seychelles	280	585	2.17	3900	4767.17	2.87101
Seychelles	1570	393	111	1930	4004	4.21248
Seychelles	1610	543	80	2720	4953	3.4458
Seychelles	979	537	79.9	2260	3855.9	3.53299
Seychelles	456	262	173	2380	3271	3.04841
Seychelles	1610	459	57.3	2640	4766.3	1.50003
Seychelles	1040	580	110	3410	5140	2.14508
Seychelles	3170	766	76.3	4270	8282.3	3.24599
Seychelles	1400	230	1.89	2410	4041.89	2.109
Seychelles	524	153	70.9	1180	1927.9	3.48227
Seychelles	894	415	34.8	2630	3973.8	3.62675
Seychelles	40.4	132	170	84.6	427	2.11879
Seychelles	1360	771	104	4090	6325	2.49865
Seychelles	867	555	2.28	2610	4034.28	3.21479
Seychelles	1220	549	212	3850	5831	3.44185
Ghana	2430	1090	164	4550	8234	4.30494
Ghana	1670	818	120	4520	7128	4.20397
Ghana	3830	1270	5.22	5070	10175.2	3.4828
Seychelles	1350	405	240	3700	5695	2.86847
Ghana	1470	931	154	3230	5785	3.71604
Seychelles	442	156	45.1	1040	1683.1	2.89186
Ghana	2690	1950	37.5	4670	9347.5	3.69632
Ghana	1930	1300	7.39	3250	6487.39	2.83354
Seychelles	876	288	161	4700	6025	2.58803
Seychelles	1330	336	35.2	2040	3741.2	3.81209
Ghana	5090	1120	133	5160	11503	3.20877
Seychelles	2100	781	67.1	3770	6718.1	3.6981
Ghana	3640	858	17.1	4050	8565.1	3.54669
Seychelles	3920	926	27.1	4690	9563.1	3.7067
Ghana	1710	563	83.2	2920	5276.2	4.0976
Seychelles	152	40.1	46.6	530	768.7	3.67116
Seychelles	711	381	36.5	2150	3278.5	3.61988
Ghana	4660	1600	49.6	7000	13309.6	4.26178
Seychelles	1210	397	95.7	2400	4102.7	3.57344
Ghana	1480	581	188	3050	5299	4.65511
Seychelles	584	304	144	1690	2722	3.85663
Ghana	1240	585	159	2960	4944	4.54837
Ghana	1890	2070	14.8	4920	8894.8	3.69103
Seychelles	1970	600	105	2410	5085	3.37502
Ghana	1360	746	172	3950	6228	4.68646
Seychelles	733	282	135	1540	2690	3.54953
Ghana	788	716	4.72	1950	3458.72	3.37624
Seychelles	1740	522	52.8	2790	5104.8	2.57126
Ghana	3450	1140	77.1	5130	9797.1	3.81564
Seychelles	1690	517	105	2500	4812	3.71068
Ghana	2250	1690	80	4680	8700	3.9413
Ghana	4030	1830	372	7780	14012	3.59225
Ghana	1740	1040	52.5	3560	6392.5	4.57291
Seychelles	858	442	116	1520	2936	3.6621
Seychelles	965	429	94.4	2010	3498.4	3.00945
Seychelles	1870	243	30.4	3270	5413.4	2.98635
Seychelles	604	291	190	1360	2445	2.85997
Seychelles	461	393	76.3	1680	2610.3	3.94964
Seychelles	1730	736	43.7	3500	6009.7	3.11002
Ghana	2840	1240	58.1	3910	8048.1	3.42328
Ghana	3690	1230	27	5430	10377	3.78639
Ghana	3710	999	3	5250	9962	3.39194
Ghana	1900	1100	134	4480	7614	3.78632
Ghana	3140	1050	77.3	5160	9427.3	3.78412
Ghana	2510	666	21.6	4900	8097.6	2.74067
Ghana	1650	852	247	3590	6339	3.99027
Ghana	2070	1270	37.7	5370	8747.7	4.23209
Ghana	1140	486	61.4	2930	4617.4	4.29438
Seychelles	898	188	33.2	1630	2749.2	2.65003
Seychelles	1590	352	62	2730	4734	3.21588
Seychelles	1760	646	102	3460	5968	3.31723
Seychelles	499	224	105	1440	2268	4.05438
Ghana	862.66	596.95	217.59	2634.18	4311.38	3.30176
Seychelles	987	434	114	1980	3515	4.22537
Seychelles	834	487	96.2	2440	3857.2	3.57173
Seychelles	3510	1640	129	7970	13249	3.87526
Seychelles	1550	809	38.8	2880	5277.8	3.55522
Ghana	2270.55	2223.46	210.23	3984.45	8688.69	3.70978
Seychelles	1800	701	82.5	3530	6113.5	4.18979
Seychelles	372	158	97.8	1380	2007.8	3.4879
Seychelles	2690	823	86.3	4010	7609.3	3.45577
Seychelles	1170	997	19.8	3290	5476.8	2.71502
Seychelles	4330	1030	45.1	5400	10805.1	3.47998
Seychelles	2000	1240	320	4440	8000	3.94949
Seychelles	541	118	100	1150	1909	3.62707
Ghana	2220	1420	43.3	3880	7563.3	3.2862
Seychelles	1090	335	116	2220	3761	3.69086
Seychelles	1960	688	170	2480	5298	3.36971
Ghana	1560	525	132	2430	4647	2.64489
Seychelles	1460	605	108	2610	4783	3.87366
Seychelles	2660	1000	44.2	2670	6374.2	3.58896
Seychelles	904	523	67.4	2360	3854.4	4.23371
Seychelles	2520	919	136	4110	7685	3.42771
Seychelles	2300	935	47.8	4030	7312.8	3.77136
Ghana	1117.13	975.38	129.81	3125.71	5348.02	3.62515
Seychelles	384	174	122	1150	1830	3.74988
Seychelles	792	315	91.3	1430	2628.3	3.92449
Seychelles	3780	1010	33.5	4950	9773.5	3.42924
Seychelles	2070	1050	9.76	4710	7839.76	3.15698
Seychelles	1300	538	79.9	3210	5127.9	3.62168
Seychelles	1350	832	36.2	3640	5858.2	2.5143
Seychelles	605	283	102	1500	2490	3.52311
Seychelles	902	391	97.3	1520	2910.3	3.61411
Seychelles	1290	713	43.4	4230	6276.4	3.43502
Seychelles	837	383	128	1890	3238	2.80422
Seychelles	566	408	42.3	2050	3066.3	2.86324
Seychelles	378	90.6	72	1550	2090.6	3.91292
Seychelles	870	520	142	2270	3802	3.61407
Seychelles	2590	540	77.8	3740	6947.8	2.91888
Seychelles	1090	809	59.6	4310	6268.6	3.27281
Seychelles	1510	792	127	3160	5589	3.37003
Seychelles	454	334	13.8	1360	2161.8	2.62653
Seychelles	5600	910	40.9	4700	11250.9	3.90508
Seychelles	1810	1060	99.2	3910	6879.2	3.04746
Seychelles	2670	348	24.9	3630	6672.9	3.28176
Seychelles	1360	1310	29.2	4940	7639.2	3.32724
Seychelles	2690	611	6.29	3040	6347.29	2.73884
Seychelles	1630	432	64.1	2010	4136.1	2.76005
Seychelles	4300	2750	287	6370	13707	3.43327
Seychelles	447	743	2.89	3430	4622.89	2.27868
Seychelles	316	1130	2.24	4040	5488.24	3.07475
Seychelles	695	447	147	1850	3139	3.79431
Seychelles	2210	1070	241	3200	6721	3.43613
Seychelles	1880	679	51.7	3370	5980.7	3.37365
Seychelles	1070	669	98.9	2790	4627.9	3.33897
Seychelles	1290	306	86.8	2750	4432.8	3.31002
Seychelles	722	372	146	2110	3350	2.93657
Seychelles	1000	456	183	2510	4149	3.74355
Seychelles	641	199	76	1270	2186	3.78365
Seychelles	639	390	148	1240	2417	3.79572
Seychelles	1460	523	7.71	2020	4010.71	2.5426
Seychelles	1490	320	13.2	2630	4453.2	2.7337
Seychelles	1460	871	52	4370	6753	3.5824
Ghana	1800	1190	44.8	4130	7164.8	3.89474
Ghana	1200	796	79	2540	4615	3.49601
Seychelles	1650	374	182	4050	6256	3.36096
Seychelles	1330	394	63.5	3000	4787.5	2.89039
Seychelles	809	261	64.6	2140	3274.6	3.5468
Seychelles	1420	595	109	2020	4144	2.92538
Seychelles	1510	1260	146	3430	6346	3.53504
Seychelles	468	153	143	1680	2444	3.55098
Ghana	1120	556	130	3470	5276	3.29178
Ghana	2250	1230	108	5110	8698	4.17954
Seychelles	985	483	91.1	3210	4769.1	3.29265
Seychelles	1060	907	89.6	3260	5316.6	3.26948
Ghana	927	852	33.4	3270	5082.4	3.65462
Ghana	1890	1930	121	5830	9771	3.39855
Seychelles	796	413	119	2470	3798	3.1499
Seychelles	1610	814	57	3270	5751	3.1333
Seychelles	1970	1320	65.2	5060	8415.2	2.94152
Ghana	4900	1220	34.3	4150	10304.3	3.60294
Ghana	2670	1430	232	4700	9032	4.12033
Seychelles	423	78.7	76.8	1400	1978.5	3.73379
Ghana	4680	1380	34.8	5270	11364.8	3.08193
Seychelles	351	136	149	2050	2686	3.53278
Seychelles	1830	1140	101	5160	8231	4.18701
Seychelles	1010	561	136	2270	3977	3.53701
Seychelles	2660	1030	29.5	4250	7969.5	3.47904
Seychelles	2980	217	33.3	3730	6960.3	3.49162
Seychelles	786	316	121	1210	2433	3.55784
Seychelles	696	469	38.1	3220	4423.1	3.78079
Seychelles	437	194	118	1520	2269	3.30939
Seychelles	2720	594	26.5	4640	7980.5	3.50358
Seychelles	2000	389	1.03	3360	5750.03	2.54171
Seychelles	1100	558	199	2550	4407	2.64544
Seychelles	2590	980	36	5280	8886	3.70165
Seychelles	1370	588	28.4	4090	6076.4	3.01
Seychelles	623	443	108	2420	3594	3.08413
Seychelles	1200	639	147	2550	4536	3.97538
Seychelles	1830	1290	80	4950	8150	3.19381
Seychelles	3070	895	43	4770	8778	3.1729
Seychelles	2120	550	28.3	4070	6768.3	3.20156
Seychelles	1330	776	36.8	3660	5802.8	3.5536
USA	270.96	580.14	164.94	574.6	1590.64	2.84901
Jamaica	1633.34	657.09	141.98	1733.53	4165.94	2.38604
Ghana	2627.99	1974.55	60.05	5302.59	9965.18	2.0674
Jamaica	652.08	828.56	280.55	813.28	2574.46	2.64111
Jamaica	1322.27	2083.59	476.76	2012.21	5894.83	3.29812
Jamaica	NA	NA	NA	NA	NA	3.30179
South Africa	1239.1	1122.04	79.35	1409	3849.48	2.95863
Jamaica	664.83	916.27	51.5	1045.36	2677.96	3.40315
Jamaica	187.23	178	110.33	459.83	935.39	3.48042
South Africa	950.02	791.62	165.5	1110.39	3017.54	3.13223
Jamaica	607.35	589.38	105.29	1657.12	2959.13	3.82943
USA	1028.23	778.45	161.16	2555.51	4523.36	3.49459
USA	1024.16	1230.02	158.97	2375.96	4789.09	3.67907
Jamaica	1929.62	1561.26	55.55	2040.68	5587.12	3.50881
South Africa	2450.84	1859.8	42.04	1980.75	6333.43	3.1
Jamaica	34.71	1.56	1.41	460.73	498.4	0.604912
USA	299.62	391.16	33.51	861.15	1585.44	2.50702
South Africa	218.1	98.31	44.06	378.17	738.64	3.64229
Jamaica	728.6	735.79	83.48	1622.66	3170.52	3.43615
USA	938.22	663.91	136.85	1431.64	3170.63	2.61223
USA	709.69	1048.07	9.49	2953.36	4720.6	2.0131
Jamaica	777.02	1025.31	28.84	1328.24	3159.42	3.1766
South Africa	2595.01	1630.51	96.57	1651.12	5973.22	3.39062
USA	970.82	748.05	218.92	2591.84	4529.63	3.15179
Jamaica	1761.24	1502.79	65.64	1875.87	5205.54	3.47878
Jamaica	838.39	1586.33	182.93	1532.76	4140.4	3.48136
Ghana	1370	1510	76.3	4510	7466.3	3.27728
USA	615.6	560.38	69.96	1560.45	2806.39	2.4482
Ghana	1650	1120	117	4130	7017	4.08636
Jamaica	385.74	799.54	181.63	867.51	2234.42	3.78138
Jamaica	2583.92	1978.95	15.3	3228.83	7807	3.53539
USA	859.33	790.35	180.41	3236.8	5066.89	3.24321
Ghana	4680	1100	53.2	4990	10823.2	4.03312
USA	187.9	212.3	69.4	580.1	1049.7	2.50816
Jamaica	433.24	472.86	175.85	612.8	1694.76	3.16958
Ghana	2660	844	72.7	4120	7696.7	3.54241
Jamaica	1005.47	787.67	149.96	1230.4	3173.5	3.29335
USA	516.71	1169.66	100.14	1455.36	3241.87	2.61093
USA	382.25	418.43	213.71	1270.4	2284.79	1.28309
Ghana	956	1820	19	3410	6205	2.8892
Jamaica	1024.7	924.84	193.96	1739.52	3883.03	3.58868
USA	695.61	593.42	64.04	1938.18	3291.25	2.64319
Jamaica	2698.51	1617.76	58.94	2262.43	6637.64	2.58725
Ghana	1970	774	65.3	3550	6359.3	2.04613
Jamaica	765.01	581.46	230.99	1054.05	2631.51	4.00081
Jamaica	1432.98	2310.46	131.56	2801.82	6676.82	2.80606
Jamaica	1268.3	1246.46	60.88	1877.37	4453	2.80432
Ghana	691.54	359	145.99	2540.8	3737.34	4.03863
Jamaica	346.74	223.13	153.63	897.78	1621.28	3.28252
Jamaica	853.91	1177.87	373.3	1571.71	3976.8	2.50446
Jamaica	2363.97	1993.68	361.58	2439.23	7158.46	2.79642
Ghana	1636.43	1464.39	166.63	5344.63	8612.07	4.24324
Jamaica	1872.32	2677.58	116.78	2992.1	7658.79	2.19091
Jamaica	441.56	2124.26	2.66	1893.85	4462.32	2.7541
Ghana	1602.72	1872.78	85.74	4581.97	8143.2	3.63683
Jamaica	NA	NA	NA	NA	NA	3.66504
Jamaica	2293.74	1804.84	111.71	2180.02	6390.31	2.35102
Jamaica	777.21	535.3	122.03	895.83	2330.37	2.41005
USA	3180.92	1615.78	57.97	2876.73	7731.4	3.49552
Ghana	1370.85	992.56	38.05	2724.56	5126.02	2.68071
Jamaica	1289.19	1812.32	340.43	1609.17	5051.11	3.41497
Jamaica	1780.09	1861.12	77.16	2153.05	5871.42	3.24717
USA	1129.86	1118.08	234.2	1567.22	4049.36	4.05208
Jamaica	2049.76	2244.51	98.94	2801.82	7195.03	2.75589
Jamaica	928.03	998.93	213.46	1514.78	3655.19	3.56914
Ghana	1687.17	1465.27	205.49	4221.66	7579.58	3.90651
USA	753	666.32	128.12	987.83	2535.26	3.57808
Jamaica	1153.89	1530.05	131.74	1350.72	4166.39	2.47028
Jamaica	1803.01	1432.22	118.64	2340.34	5694.22	3.64525
Jamaica	564.1	499.9	106.1	1231.6	2401.71	2.88488
Jamaica	1011.39	242.92	65.54	786.16	2106	2.10619
Ghana	1681.99	777.57	27.72	4509.91	6997.19	2.24594
Ghana	2681.7	3551.71	35.38	4984.32	11253.1	1.87971
USA	580	791.4	89.82	1475.22	2936.44	1.66318
Jamaica	479.63	395.04	167.97	622.24	1664.89	1.6512
Jamaica	1447.4	1178.75	83.38	1651.12	4360.65	3.77595
Ghana	1330.11	963.04	134.1	2339.33	4766.57	3.13493
Jamaica	1949.95	955.62	107.96	2102.11	5115.65	2.86313
Jamaica	780.54	1374.4	62.61	1961.27	4178.82	3.08263
USA	486.29	591.57	61.18	626.74	1765.78	3.17116
Jamaica	1070.35	1616.88	124.86	2262.43	5074.52	2.71023
Jamaica	1717.99	1028.39	59.75	2385.29	5191.42	1.72607
Jamaica	747.82	870.32	34.09	1405.85	3058.09	1.53845
Ghana	1094.53	1018.99	157.38	2351.64	4622.54	3.67152
Jamaica	764.64	739.96	125.88	977.49	2607.97	3.8747
Jamaica	1091.42	3213.98	65.79	2824.29	7195.48	2.22057
Jamaica	996.6	1353.74	109.8	2060.16	4520.3	2.22894
USA	816.21	816.47	193.53	1026.03	2852.24	2.73296
Jamaica	1024.88	965.51	172.23	1333.04	3495.66	3.28572
Ghana	1603.83	1161.29	189.81	2795.42	5750.35	3.30483
Jamaica	1225.97	1360.56	453.31	1934.3	4974.15	3.86241
USA	2293.74	2394	160.35	2485.68	7333.76	3.49625
Ghana	2336.85	2529.64	101.72	4044.5	9012.72	2.23991
Jamaica	1674.56	1093.02	67.68	1935.8	4771.05	3.36907
Jamaica	183.57	80.64	33.31	633.19	930.71	1.95861
Jamaica	3456.31	1357.7	9.32	2589.06	7412.39	2.33409
USA	814.91	998.71	421.97	1223.51	3459.1	3.4977
Ghana	3186.18	920.75	72.51	4882.23	9061.67	2.89672
Jamaica	1880.15	937.84	133.26	3380.93	6332.18	3.97542
USA	1026.54	779.09	386.04	1576.21	3767.89	2.52767
Ghana	1006.01	587.69	154.11	2484.95	4232.77	4.05297
Jamaica	NA	NA	NA	NA	NA	1.84977
Jamaica	1237.14	579.94	119.04	3313.67	5249.79	2.77289
Jamaica	1445.89	1804.49	789.87	3103.49	7143.75	2.58017
Jamaica	1016.38	473.5	155.4	2860.88	4506.16	2.14028
Jamaica	1040.82	295.17	164.88	1268.3	2769.17	1.57303
Jamaica	2377.97	726.56	118.29	3408.55	6631.36	3.43733
Jamaica	318.99	218.16	171.88	1334.36	2043.39	3.02349
Jamaica	3226.92	1554.79	106.42	3676.38	8564.52	2.59937
Jamaica	1245.88	696.07	73.96	2145.06	4160.97	2.31155
Jamaica	1209.73	346.62	207.53	2762.39	4526.27	3.7003
Jamaica	787.32	1078.47	15.16	2082.6	3963.55	2.73093
Jamaica	1651.98	417.82	46.92	2470.54	4587.26	2.75056
Jamaica	902.89	591.92	179.65	1849.6	3524.06	3.79069
Jamaica	1248.84	824.71	217.54	1979.31	4270.4	1.46291
Jamaica	678.42	649.19	24.72	1866.42	3218.75	2.19937
Jamaica	391.74	58.49	106.99	1143.03	1700.24	2.0292
Jamaica	499.15	237.37	119.7	1330.75	2186.97	1.47644
Jamaica	717.84	422.4	198.13	1437.64	2776.01	3.98471
Jamaica	2084.61	556.33	121.04	3559.88	6321.86	2.75842
Jamaica	505.23	356.14	136.65	1142.43	2140.45	2.93532
Jamaica	904.07	847.62	270.24	1616.6	3638.53	3.35784
Jamaica	792.8	486.9	172.03	1208.25	2659.97	3.39132
Jamaica	1595.68	768.67	9.92	3021.82	5396.09	2.78725
Jamaica	693.11	643.46	228.03	906.62	2471.22	3.51569
Jamaica	1304.1	495.88	38.93	2877.69	4716.61	3.28822
Jamaica	1074.31	523.55	109.01	2589.44	4296.31	4.3514
Jamaica	807.32	691.49	45.39	2901.71	4445.91	2.59241
Jamaica	1441.89	682.15	230.2	3041.03	5395.28	2.82978
Jamaica	1346.33	440.02	79.52	2547.41	4413.28	3.30459
Jamaica	1887.56	1452.05	242.25	3350.9	6932.77	3.21368
Jamaica	1164.09	1430.73	110.32	3528.66	6233.8	2.44144
Jamaica	1325.29	1788.63	12.98	3544.27	6671.17	3.72808
Jamaica	444.33	5.85	8.78	634.87	1093.83	3.73169
Jamaica	940.22	537.12	55.82	2048.97	3582.14	3.60876
Jamaica	497.97	207.41	149.21	1357.18	2211.76	2.96152
Jamaica	998.45	488.13	12.46	2454.93	3953.96	4.53036
Jamaica	1959.19	900.66	76.27	1836.91	4773.03	3.50171
Jamaica	955.04	696.25	223.66	2659.1	4534.05	2.81909
Jamaica	1748.29	717.57	59.19	3367.72	5892.77	2.70552
Jamaica	873.55	1030.71	187.78	2735.97	4828.01	3.38446
Jamaica	793.84	536.24	43.16	3009.81	4383.05	1.902
Jamaica	1058.31	648.49	124.58	3033.83	4865.2	3.32015
Jamaica	1086.31	435.44	91.45	2593.05	4206.24	3.11172
Jamaica	962.89	533.07	220.6	1631.01	3347.57	1.60142
Jamaica	1091.2	1800.97	41.08	2602.65	5535.9	2.11483
Jamaica	922.89	694.48	62.56	2776.8	4456.74	3.67724
Jamaica	1781.57	1758.02	112.09	2758.37	6410.05	2.50829
Jamaica	324.91	131.3	89.3	852.38	1397.9	3.76826
Jamaica	1096.83	839.69	43.65	3580.3	5560.47	3.60769
Jamaica	857.7	347.68	107.67	1619	2932.05	2.5518
Jamaica	664.65	408.13	58.99	2182.29	3314.05	3.35233
Jamaica	631.31	461.34	51.41	1552.94	2697.01	4.23262
Jamaica	959.48	1302.09	30.9	3054.24	5346.72	3.05247
Jamaica	695.14	835.15	63.35	1606.17	3199.82	2.69322
Jamaica	1512.71	903.3	77.41	3743.64	6237.07	2.25602
Jamaica	672.2	438.96	135.14	2417.69	3664	3.41242
Jamaica	884.81	401.96	168.96	1996.13	3451.86	3.98662
Jamaica	879.03	545.93	149.21	2235.14	3809.31	1.94914
Jamaica	766.73	97.26	101.31	1135.7	2101	2.6832
Jamaica	1170.91	619.59	199.19	1964.9	3954.59	3.92863
Jamaica	896.37	1899.65	12.96	3132.31	5941.29	2.82262
Jamaica	922.3	335.52	43.73	1597.38	2898.93	3.19841
Jamaica	438.79	160.37	98.36	780.46	1477.98	3.95201
Jamaica	304.47	103.41	103.11	908.95	1419.93	3.80014
Jamaica	2189.8	787	48.33	3724.43	6749.56	3.37989
Jamaica	840.36	588.05	217.33	1879.63	3525.37	3.73358
Jamaica	485.22	294.11	150.27	1376.39	2306	2.77595
Jamaica	2099.43	970.8	34.58	2989.39	6094.19	2.23094
Jamaica	936.67	592.45	93.35	2331.22	3953.68	2.92637
Jamaica	747.27	625.43	173.63	669.74	2216.06	3.00097
Jamaica	183.13	81.03	4.3	697.8	966.25	2.49064
Jamaica	862.88	1808.02	70.47	2841.66	5583.03	3.51518
Jamaica	1252.25	262.39	89.49	1975.71	3579.84	3.75424
Jamaica	3203.22	648.31	22.33	2874.09	6747.95	3.08364
Jamaica	502.37	243.14	143.13	1051.8	1940.44	1.51199
Jamaica	683.17	845.15	38.73	2791.22	4358.26	3.13713
Jamaica	1657.91	740.12	100.95	2342.03	4841.01	2.29889
Jamaica	629.38	210.94	65.47	1413.62	2319.41	3.14618
Jamaica	653.83	365.83	180.99	1974.51	3175.17	4.02436
Jamaica	861.31	72	156.61	1559.73	2649.64	3.23532
Jamaica	1274.18	1301.74	453.46	2970.17	5999.54	3.49506
Jamaica	345.21	256.58	139.37	983.05	1724.21	3.4525
Jamaica	603.16	690.08	173.66	2513.78	3980.68	2.72718
Jamaica	828.36	725.32	251.44	2277.17	4082.3	3.28037
Jamaica	426.7	65.98	130.67	728.43	1351.77	3.07669
Jamaica	419.44	161.56	90.94	636.07	1308.01	2.15709
Jamaica	2487.61	1419.98	526.38	4021.08	8455.05	3.18573
Jamaica	371.88	140.99	109.2	1275.5	1897.58	3.58101
Jamaica	1520.12	592.28	140.24	3119.1	5371.74	3.96446
Jamaica	937.41	715.28	83.05	1819.58	3555.31	3.40167
Jamaica	470.26	276.84	21.53	1520.52	2289.15	3.37238
Jamaica	1506.79	597.56	90.53	2561.82	4756.7	3.31366
Jamaica	1204.99	717.74	60.32	2702.34	4685.39	3.81543
Jamaica	2453.53	1018.02	107.26	3361.71	6940.52	2.41513
Jamaica	1071.34	1379.8	74.6	3365.31	5891.06	3.40223
Jamaica	774.43	452.71	90.61	1970.91	3288.66	3.38614
Jamaica	1614.94	1206.23	15.07	2023.75	4859.99	3.27184
Jamaica	636.94	498	201.75	1807.57	3144.25	3.30813
Jamaica	900.66	336.93	38.32	1703.07	2978.99	3.85701
Jamaica	810.29	532.71	283.92	2077.8	3704.72	3.44997
Jamaica	943.33	478.08	68.77	2368.45	3858.64	3.07252
Jamaica	1229.43	1089.22	156.79	2310.8	4786.24	2.638
Jamaica	672.65	610.6	156.61	2004.54	3444.39	3.87548
Jamaica	654.87	481.79	156.95	1472.48	2766.08	3.67687
Jamaica	1466.64	231.38	24.82	1993.73	3716.56	2.19673
Jamaica	538.86	575.89	194.33	1620.2	2929.28	3.70951
Jamaica	793.1	599.15	57.05	2750.38	4199.68	3.85662
Jamaica	5282.43	1003.32	28.87	2797.32	9111.95	3.70738
Jamaica	873.4	550.86	95.55	2230.33	3750.15	3.41076
Jamaica	835.47	193.84	127.58	2275.97	3432.87	3.0502
Jamaica	744.8	711.58	219.78	2434.51	4110.67	2.76784
Jamaica	408.33	217.81	59.03	1072.89	1758.06	3.49768
Jamaica	2271.56	1182.27	314.44	2524.63	6292.9	3.32451
Jamaica	197.94	65.2	88.22	928.52	1279.89	3.62044
Jamaica	756.8	236.49	138.06	1783.54	2914.89	1.57151
Jamaica	1092.16	2189.77	107.4	1419.64	4808.97	3.0708
Jamaica	1046.6	1296.45	58.34	2805.63	5207.02	3.4969
Jamaica	3042.3	5306.8	171.46	3216.84	11737.4	3.008
Jamaica	728.21	677.39	251.24	1931.27	3588.11	3.59293
Jamaica	951.93	493.94	144.39	2759.99	4350.25	3.8894
Jamaica	285.65	447.6	227.14	784.16	1744.55	2.82799
Jamaica	1038.9	1288.34	158.4	2808.03	5293.68	2.70356
Jamaica	847.77	736.6	66.65	2266.36	3917.38	3.57867
Jamaica	560.04	201.42	116.51	1673.05	2551.02	3.74052
Jamaica	1086.9	1039.35	250.42	2836.86	5213.53	2.8508
Jamaica	719.46	1397.25	5.3	2681.92	4803.93	2.41959
Jamaica	519.6	192.43	85.16	826.56	1623.74	2.62232
Jamaica	1774.96	1205.87	105.38	3054.24	6140.45	3.06118
Jamaica	1511.23	1103.31	201.48	4347.76	7163.79	2.69133
Jamaica	161.49	12.79	59.99	746.33	980.61	2.46945
Jamaica	1514.2	611.48	80.27	2477.75	4683.7	2.57399
Jamaica	3573.62	1705.63	225.71	4603.59	10108.5	2.86942
Jamaica	1484.56	670.16	92.49	2494.56	4741.78	1.78825
Jamaica	870.29	542.05	166.94	2374.46	3953.74	3.47727
Jamaica	508.93	343.45	56.74	2236.34	3145.46	3.27271
Jamaica	928.96	256.4	45.2	1878.43	3108.99	2.94783
Jamaica	486.56	247.41	108.48	1121.53	1963.98	3.15286
Jamaica	1614.94	918.99	63.3	3459	6056.23	2.69448
Jamaica	531.3	348.21	99.64	1090.42	2069.57	3.62172
Jamaica	1366.48	1082.17	211	3095.08	5754.73	3.45347
Jamaica	944.96	856.25	327.02	1969.71	4097.94	3.05083
Jamaica	719.61	259.92	163.33	1597.38	2740.25	3.68771
Jamaica	1021.71	1420.86	38.83	4016.28	6497.68	3.52982
Jamaica	339.88	265.74	133.5	1408.82	2147.94	2.86124
Jamaica	1095.2	697.83	146.58	2087.41	4027.01	3.35238
Jamaica	385.51	197.19	102.8	1514.51	2200.02	2.15913
Jamaica	1016.38	63.69	52.31	2322.81	3455.19	2.49296
Jamaica	988.23	825.94	98.21	2472.94	4385.32	3.73962
Jamaica	1311.36	532.89	77.78	2248.35	4170.38	3.24215
Jamaica	NA	NA	NA	NA	NA	3.26927
Jamaica	746.28	1198.3	68.98	2230.33	4243.89	2.73399
Jamaica	2819.48	1000.93	99.74	4102.75	8022.91	2.94851
Jamaica	741.99	141.73	86.59	1078.53	2048.84	2.53364
Jamaica	865.4	803.21	44.1	2035.76	3748.48	3.32379
Jamaica	1969.05	996.17	35.83	2349.23	5350.28	3.27035
Jamaica	1663.84	996.88	224.07	4376.59	7261.38	3.72012
Jamaica	851.48	455.18	21.79	2015.35	3343.79	2.69518
Jamaica	561.82	797.04	58.66	1733.1	3150.63	3.5303
Jamaica	1336.26	1069.13	382.58	3592.31	6380.27	3.95144
Jamaica	2671.32	1027.72	23.33	2432.11	6154.47	3.7544
Jamaica	338.4	90.22	71.8	787.88	1288.3	3.33048
Jamaica	2579.47	1199.88	19.02	2615.87	6414.23	1.52991
Jamaica	1081.86	843.04	305.16	2112.63	4342.69	2.41462
Jamaica	679.61	523.9	239.6	1358.38	2801.49	3.23433
Jamaica	879.63	566.02	271.67	2414.09	4131.4	3.97208
Jamaica	1554.2	1021.55	177.34	3364.11	6117.2	3.23727
Jamaica	1323.07	1010.45	243.07	2828.45	5405.03	3.00346
Jamaica	678.87	357.55	129.5	2137.85	3303.77	3.85803
Jamaica	1275.06	1228.96	29.64	3748.45	6282.11	3.06553
Jamaica	702.72	528.66	94.92	1889.24	3215.54	3.31696
Jamaica	1573.46	773.25	96.08	2905.32	5348.11	2.16936
Jamaica	334.25	225.91	163.14	943.06	1666.36	3.61786
Jamaica	701.39	570.6	166.39	1712.68	3151.06	2.92406
Jamaica	968.37	667.17	148.66	2348.03	4132.24	3.70175
Jamaica	570.86	389.62	63.69	1902.45	2926.62	3.27229
Jamaica	4561.85	1391.08	17.69	4686.46	10657.1	2.85568
Jamaica	417.07	181.15	230.41	1656.23	2484.86	2.92297
Jamaica	561.08	215.16	173.03	1361.98	2311.25	3.56762
Jamaica	1450.63	576.24	138.41	2710.75	4876.03	2.91189
Jamaica	1249.14	493.59	25.37	2076.6	3844.7	2.51139
Jamaica	900.52	1098.38	173.64	3370.12	5542.66	3.19034
Jamaica	1433.15	694.48	122.98	3332.89	5583.51	2.14513
Jamaica	1324.25	1904.94	382.37	2063.39	5674.95	2.17856
Jamaica	1601.61	1277.07	350.92	2394.87	5624.47	3.25065
Jamaica	217.35	91.93	125.15	836.64	1271.08	4.4263
Jamaica	910	971.85	2.08	4066.72	5950.65	3.20636
Jamaica	874.74	401.96	113.43	2035.76	3425.88	2.93205
Jamaica	624.2	207.76	213.66	1980.51	3026.13	3.40038
Jamaica	1090.46	1047.8	60.69	4162.8	6361.75	3.18545
Jamaica	615.9	492.01	89.3	2122.24	3319.45	2.73134
Jamaica	557.23	183.8	70.27	1124.77	1936.07	3.92222
Jamaica	826.44	585.4	250.63	1974.51	3636.98	3.60056
Jamaica	770.14	893.79	64.81	3156.33	4885.07	3.28364
Jamaica	1154.76	707.7	113.28	2862.08	4837.82	3.39319
Jamaica	504.48	412.35	176.13	1426.84	2519.81	3.42981
Jamaica	NA	NA	NA	NA	NA	3.63029
Jamaica	870.29	302.22	151.3	1972.11	3295.91	3.36961
Jamaica	601.53	361.43	138.49	1970.91	3072.35	4.42772
Jamaica	946.45	703.12	89.69	2874.09	4613.34	3.50205
Jamaica	1497.9	804.44	136.75	2866.88	5305.98	2.7618
Jamaica	43.38	19.1	21.47	224.95	308.91	2.61791
Jamaica	1640.13	519.32	19.04	4541.13	6719.62	1.97537
Jamaica	NA	NA	NA	NA	NA	2.66474
Jamaica	894.44	241.42	115.12	1412.42	2663.41	3.20425
Jamaica	649.68	484.08	72.29	2230.33	3436.38	3.21523
Jamaica	924.81	603.2	198.74	2865.68	4592.44	3.50926
Jamaica	NA	NA	NA	NA	NA	3.16233
Jamaica	5676.01	425.4	98.68	4257.69	10457.8	4.06794
Jamaica	NA	NA	NA	NA	NA	2.11085
Jamaica	5339.69	2229.18	127.05	6220.19	13916.1	2.40263
Jamaica	2031.27	870.53	25.23	4138.78	7065.81	2.91648
Jamaica	NA	NA	NA	NA	NA	2.89573
Jamaica	3164.7	561.08	18.18	2549.81	6293.77	2.63181
Jamaica	727.91	344.86	133.79	1436.44	2643.01	3.8435
Jamaica	294.99	35.98	67.61	894.29	1292.88	3.54154
Jamaica	727.32	303.98	214.06	2475.34	3720.7	3.56068
Jamaica	NA	NA	NA	NA	NA	2.63126
Jamaica	NA	NA	NA	NA	NA	2.15549
Jamaica	NA	NA	NA	NA	NA	3.65428
Jamaica	936.52	551.57	182.47	2160.67	3831.22	3.69515
Jamaica	1841.63	734.66	180.89	2689.13	5446.31	2.90122
Jamaica	569.68	393.85	197.17	1978.11	3138.81	4.10364
Jamaica	594.12	403.02	203.93	1420.83	2621.9	3.7978
Jamaica	76.85	296.58	44.3	1354.77	1772.51	2.8012
Jamaica	NA	NA	NA	NA	NA	2.7152
Jamaica	1194.02	1086.04	30.68	2727.56	5038.31	2.38794
Jamaica	NA	NA	NA	NA	NA	3.64791
Jamaica	694.57	331.47	196.58	2869.28	4091.91	3.34892
Jamaica	521.97	526.9	161.53	2110.23	3320.62	3.99954
Jamaica	800.66	440.55	188.74	1949.29	3379.23	3.20161
Jamaica	NA	NA	NA	NA	NA	2.58821
Jamaica	478.41	222.92	116.63	1145.55	1963.51	3.67508
Jamaica	NA	NA	NA	NA	NA	3.84838
Jamaica	NA	NA	NA	NA	NA	3.27819
Jamaica	1346.92	386.1	125.52	2701.14	4559.68	3.63871
Jamaica	NA	NA	NA	NA	NA	3.56332
Jamaica	880.37	716.69	141.2	2011.74	3750	3.07386
Jamaica	484.19	144.15	111.63	1563.75	2303.72	3.95464
Jamaica	664.79	703.82	0.74	3097.48	4466.84	3.41188
Jamaica	NA	NA	NA	NA	NA	2.1777
Jamaica	590.57	437.2	160.51	1459.26	2647.54	2.79986
Jamaica	311.14	56.21	112.89	1153.84	1634.08	3.39691
Jamaica	1179.65	411.12	74.17	1727.1	3392.03	3.27189
Jamaica	1258.62	1290.81	339.48	1668.24	4557.16	0.838231
Jamaica	NA	NA	NA	NA	NA	3.52303
Jamaica	755.32	564.43	90.73	1751.12	3161.6	3.3018
Jamaica	1155.5	537.82	175.11	3201.97	5070.41	2.80899
Jamaica	1471.97	623.82	234.29	3055.45	5385.52	2.76509
Jamaica	NA	NA	NA	NA	NA	3.85231
Jamaica	737.84	571.83	97.49	2142.66	3549.82	3.71304
Jamaica	1629.76	1452.93	372.57	3628.34	7083.61	3.93822
Jamaica	301.95	195.08	133.85	1051.03	1681.91	3.83704
Seychelles	766	450	103	3960	5279	2.49418
Seychelles	2490	3710	52.9	10400	16652.9	3.16288
Jamaica	NA	NA	NA	NA	NA	2.38647
Jamaica	765.1	285.12	41.55	2177.49	3269.25	2.42978
Jamaica	398.25	116.29	93.41	954.83	1562.78	3.45881
Jamaica	NA	NA	NA	NA	NA	3.81882
Jamaica	522.56	240.72	89.83	986.41	1839.52	3.65414
Jamaica	963.34	653.25	246.75	2159.47	4022.8	2.66991
Seychelles	1110	553	19.3	2820	4502.3	2.95846
Seychelles	1160	550	37	2680	4427	2.77488
Jamaica	NA	NA	NA	NA	NA	2.87509
Jamaica	NA	NA	NA	NA	NA	2.71344
Seychelles	814	562	42.4	2440	3858.4	2.50002
Seychelles	552	330	35.9	3310	4227.9	3.33974
Jamaica	480.63	347.51	148.5	1030.61	2007.25	3.53682
Seychelles	1170	600	191	4700	6661	2.33171
Seychelles	882	476	94.9	3050	4502.9	2.96527
Seychelles	1340	411	16.4	2920	4687.4	2.78318
Seychelles	1070	829	352	3740	5991	3.0229
Seychelles	878	232	99.8	1900	3109.8	3.27333
Jamaica	1166.32	1147.02	38.46	3114.3	5466.09	2.84307
Seychelles	NA	NA	NA	NA	NA	3.75548
Seychelles	511	105	105	1400	2121	3.78195
Seychelles	914	249	62	2610	3835	3.3095
Seychelles	NA	NA	NA	NA	NA	2.88479
Seychelles	982	300	84.9	2270	3636.9	3.73367
Seychelles	776	216	45.8	1860	2897.8	2.49559
Seychelles	888	1050	172	4910	7020	2.46907
Seychelles	1430	452	26.2	3410	5318.2	3.84247
Seychelles	660	293	147	1370	2470	3.43529
Seychelles	835	316	254	3510	4915	3.18032
Seychelles	682	1340	58.7	4060	6140.7	1.67103
Seychelles	1460	577	35.1	2800	4872.1	3.25425
Seychelles	974	1320	20.5	4730	7044.5	3.24191
Jamaica	808.81	442.84	118.37	2238.74	3608.75	3.50691
Seychelles	4010	974	42.5	4930	9956.5	3.44793
Seychelles	194	43.1	69	361	667.1	1.38747
Jamaica	1973.49	1503.69	134.69	4030.69	7642.56	3.67144
Seychelles	891	512	78	1460	2941	2.66529
Seychelles	189	88.3	49	678	1004.3	3.30217
Seychelles	NA	NA	NA	NA	NA	3.63787
Jamaica	658.87	195.43	48.04	2091.01	2993.35	3.61347
Seychelles	242	155	131	1140	1668	2.9618
Seychelles	1500	829	74.9	4000	6403.9	3.11179
Jamaica	317.21	130.67	133.1	870.03	1451.01	2.55874
Seychelles	2770	1160	291	5660	9881	2.8832
Seychelles	963	232	77.1	1550	2822.1	2.12426
Jamaica	1007.19	652.9	62.52	2797.22	4519.83	4.26934
Seychelles	757	371	37.3	2610	3775.3	4.16809
Jamaica	871.18	596.33	84.13	2547.41	4099.05	3.19052
Seychelles	2480	631	15.2	4160	7286.2	3.11436
Jamaica	1398.63	753.69	149.68	2565.42	4867.43	3.73169
Jamaica	763.47	200.01	70.53	1209.45	2243.46	3.21641
Seychelles	544	183	163	1750	2640	4.04156
Seychelles	1990	1040	8.59	4150	7188.59	2.62242
Seychelles	1110	524	191	2900	4725	4.05772
Seychelles	2050	584	81.7	4390	7105.7	3.58857

## Sheet: Fig.5
Spearman’s correlation between concentrations of SCFAs and differentially abundant ASVs (identified by ANCOMBC) among countries (5a) or obese status (Fig. 5b). For country correlations, top 30 differentially abundant taxa are used. star- FDR-adjusted (p < 0.05) p values indicated by *, ** and ***, corresponding to p < 0.05, <0.01 and <0.001 respectively. n= 1694 samples.									5b
Fig. 5a									Fig. 5a=b
Taxa	Env	Correlation	Pvalue	Type	AdjPvalue	Significance			Taxa	Env	Correlation	Pvalue	Type	AdjPvalue	Significance
ASV12822.Blautia	Acetate	-0.0896216	0.016078	Obese	0.0403621	*			ASV551.Bacteroides	Acetate	-0.139497	0.0150958	USA	0.0479253	*
ASV12822.Blautia	Acetate	-0.0227937	0.477593	non-Obese	0.54521				ASV551.Bacteroides	Acetate	-0.121709	0.0185412	South Africa	0.0704566
ASV12822.Blautia	Butyrate	0.134415	0.000295	Obese	0.000763	***			ASV551.Bacteroides	Acetate	-0.0520211	0.347637	Ghana	0.666133
ASV12822.Blautia	Butyrate	0.0983423	0.00213279	non-Obese	0.00300529	**			ASV551.Bacteroides	Acetate	-0.0295523	0.575705	Jamaica	0.591265
ASV12822.Blautia	Propionate	0.0472873	0.204712	Obese	0.26442				ASV551.Bacteroides	Acetate	-0.220354	5.69e-05	Seychelles	0.000144	***
ASV12822.Blautia	Propionate	0.0291428	0.363839	non-Obese	0.402822				ASV551.Bacteroides	Butyrate	-0.146729	0.0105457	USA	0.0572479
ASV12822.Blautia	Valerate	0.00873345	0.814905	Obese	0.935631				ASV551.Bacteroides	Butyrate	-0.0213544	0.680605	South Africa	0.862099
ASV12822.Blautia	Valerate	-0.0533542	0.0962486	non-Obese	0.186482				ASV551.Bacteroides	Butyrate	0.0886357	0.109092	Ghana	0.183201
ASV12822.Blautia	TotalSCFA	0.00173181	0.962966	Obese	0.962966				ASV551.Bacteroides	Butyrate	-0.236108	5.77e-06	Jamaica	0.000219	***
ASV12822.Blautia	TotalSCFA	0.0155961	0.627044	non-Obese	0.647945				ASV551.Bacteroides	Butyrate	-0.0685562	0.215596	Seychelles	0.390127
ASV9208.Faecalibacterium	Acetate	0.124964	0.000772	Obese	0.00332663	**			ASV551.Bacteroides	Propionate	-0.160592	0.0050777	USA	0.0321588	*
ASV9208.Faecalibacterium	Acetate	0.197249	5.44e-10	non-Obese	2.81e-09	***			ASV551.Bacteroides	Propionate	-0.132876	0.0100963	South Africa	0.0348783	*
ASV9208.Faecalibacterium	Butyrate	0.186631	4.49e-07	Obese	2.78e-06	***			ASV551.Bacteroides	Propionate	-0.200452	0.000259	Ghana	0.00196499	**
ASV9208.Faecalibacterium	Butyrate	0.241794	2.07e-14	non-Obese	3.21e-13	***			ASV551.Bacteroides	Propionate	-0.18485	0.000415	Jamaica	0.00197058	**
ASV9208.Faecalibacterium	Propionate	0.104364	0.00502979	Obese	0.00974522	**			ASV551.Bacteroides	Propionate	-0.172319	0.00173394	Seychelles	0.0219632	*
ASV9208.Faecalibacterium	Propionate	0.223547	1.74e-12	non-Obese	1.35e-11	***			ASV551.Bacteroides	Valerate	0.0428467	0.45743	USA	0.620797
ASV9208.Faecalibacterium	Valerate	-0.0998188	0.00731111	Obese	0.0174342	*			ASV551.Bacteroides	Valerate	0.0345005	0.505941	South Africa	0.609142
ASV9208.Faecalibacterium	Valerate	-0.0880813	0.00597176	non-Obese	0.0142404	*			ASV551.Bacteroides	Valerate	-0.0643221	0.245366	Ghana	0.310797
ASV9208.Faecalibacterium	TotalSCFA	0.121697	0.00106733	Obese	0.00367635	**			ASV551.Bacteroides	Valerate	-0.105541	0.0450772	Jamaica	0.0897797
ASV9208.Faecalibacterium	TotalSCFA	0.223756	1.66e-12	non-Obese	1.03e-11	***			ASV551.Bacteroides	Valerate	-0.00280253	0.959674	Seychelles	0.959674
ASV2136.Bifidobacterium	Acetate	0.0229264	0.538805	Obese	0.601819				ASV551.Bacteroides	TotalSCFA	-0.155276	0.00676607	USA	0.0367301	*
ASV2136.Bifidobacterium	Acetate	-0.136865	1.84e-05	non-Obese	4.74e-05	***			ASV551.Bacteroides	TotalSCFA	-0.0992398	0.0551723	South Africa	0.190595
ASV2136.Bifidobacterium	Butyrate	-0.0157452	0.67297	Obese	0.695402				ASV551.Bacteroides	TotalSCFA	-0.0612145	0.268966	Ghana	0.393104
ASV2136.Bifidobacterium	Butyrate	-0.135312	2.29e-05	non-Obese	4.43e-05	***			ASV551.Bacteroides	TotalSCFA	-0.142897	0.00653634	Jamaica	0.0146106	*
ASV2136.Bifidobacterium	Propionate	-0.0190972	0.60869	Obese	0.655778				ASV551.Bacteroides	TotalSCFA	-0.217707	7.02e-05	Seychelles	0.000243	***
ASV2136.Bifidobacterium	Propionate	-0.127379	6.76e-05	non-Obese	0.00013	***			ASV10646.Dialister	Acetate	0.0871764	0.130005	USA	0.240306
ASV2136.Bifidobacterium	Valerate	-0.018322	0.623313	Obese	0.772908				ASV10646.Dialister	Acetate	0.0390049	0.452003	South Africa	0.572538
ASV2136.Bifidobacterium	Valerate	0.0489673	0.126914	non-Obese	0.218574				ASV10646.Dialister	Acetate	0.0821047	0.13786	Ghana	0.637224
ASV2136.Bifidobacterium	TotalSCFA	0.0254461	0.495028	Obese	0.590226				ASV10646.Dialister	Acetate	0.198399	0.000148	Jamaica	0.000256	***
ASV2136.Bifidobacterium	TotalSCFA	-0.138729	1.41e-05	non-Obese	3.35e-05	***			ASV10646.Dialister	Acetate	0.0128848	0.816171	Seychelles	0.863331
ASV11946.Agathobacter	Acetate	0.0379481	0.308887	Obese	0.38302				ASV10646.Dialister	Butyrate	0.120442	0.0361275	USA	0.124804
ASV11946.Agathobacter	Acetate	0.0424321	0.186009	non-Obese	0.250708				ASV10646.Dialister	Butyrate	0.0660899	0.202227	South Africa	0.622974
ASV11946.Agathobacter	Butyrate	0.208788	1.52e-08	Obese	1.57e-07	***			ASV10646.Dialister	Butyrate	-0.122885	0.0260485	Ghana	0.0761419
ASV11946.Agathobacter	Butyrate	0.211434	2.7e-11	non-Obese	1.19e-10	***			ASV10646.Dialister	Butyrate	0.216259	3.42e-05	Jamaica	0.000649	***
ASV11946.Agathobacter	Propionate	0.0672477	0.0711362	Obese	0.0958793				ASV10646.Dialister	Butyrate	0.074403	0.178879	Seychelles	0.377634
ASV11946.Agathobacter	Propionate	0.134715	2.49e-05	non-Obese	5.51e-05	***			ASV10646.Dialister	Propionate	0.0756929	0.18884	USA	0.311997
ASV11946.Agathobacter	Valerate	-0.111616	0.0026889	Obese	0.0075778	**			ASV10646.Dialister	Propionate	0.165464	0.00132101	South Africa	0.0100397	*
ASV11946.Agathobacter	Valerate	-0.00843661	0.792682	non-Obese	0.792682				ASV10646.Dialister	Propionate	0.201722	0.000236	Ghana	0.00196499	**
ASV11946.Agathobacter	TotalSCFA	0.0742238	0.0463553	Obese	0.0798341				ASV10646.Dialister	Propionate	0.21034	5.63e-05	Jamaica	0.000535	***
ASV11946.Agathobacter	TotalSCFA	0.0978824	0.0022382	non-Obese	0.00365179	**			ASV10646.Dialister	Propionate	0.0598763	0.279592	Seychelles	0.42498
ASV11476.Dorea	Acetate	-0.00788677	0.83257	Obese	0.860322				ASV10646.Dialister	Valerate	-0.0505405	0.380662	USA	0.619473
ASV11476.Dorea	Acetate	0.000416	0.989653	non-Obese	0.989653				ASV10646.Dialister	Valerate	-0.0191563	0.711935	South Africa	0.756848
ASV11476.Dorea	Butyrate	0.168687	5.26e-06	Obese	1.9e-05	***			ASV10646.Dialister	Valerate	0.136423	0.0134035	Ghana	0.0727619
ASV11476.Dorea	Butyrate	0.158235	7.02e-07	non-Obese	1.67e-06	***			ASV10646.Dialister	Valerate	0.0759456	0.149856	Jamaica	0.21902
ASV11476.Dorea	Propionate	0.207473	1.88e-08	Obese	1.46e-07	***			ASV10646.Dialister	Valerate	0.0213722	0.699768	Seychelles	0.831267
ASV11476.Dorea	Propionate	0.146342	4.57e-06	non-Obese	1.09e-05	***			ASV10646.Dialister	TotalSCFA	0.0939247	0.102724	USA	0.185882
ASV11476.Dorea	Valerate	0.0192474	0.605875	Obese	0.772908				ASV10646.Dialister	TotalSCFA	0.0911364	0.078364	South Africa	0.233801
ASV11476.Dorea	Valerate	0.0432399	0.177763	non-Obese	0.262412				ASV10646.Dialister	TotalSCFA	0.0777084	0.160286	Ghana	0.262042
ASV11476.Dorea	TotalSCFA	0.0994879	0.00752959	Obese	0.0155612	*			ASV10646.Dialister	TotalSCFA	0.238259	4.71e-06	Jamaica	3.58e-05	***
ASV11476.Dorea	TotalSCFA	0.0725094	0.0237066	non-Obese	0.0334047	*			ASV10646.Dialister	TotalSCFA	0.0276513	0.6178	Seychelles	0.652122
ASV7064.Subdoligranulum	Acetate	0.0889233	0.0169261	Obese	0.0403621	*			ASV8565.Ruminococcaceae	Acetate	0.058582	0.309444	USA	0.452264
ASV7064.Subdoligranulum	Acetate	0.0508248	0.113111	non-Obese	0.166974				ASV8565.Ruminococcaceae	Acetate	0.0934575	0.07103	South Africa	0.192796
ASV7064.Subdoligranulum	Butyrate	0.22596	8.44e-10	Obese	1.31e-08	***			ASV8565.Ruminococcaceae	Acetate	-0.0862663	0.118927	Ghana	0.637224
ASV7064.Subdoligranulum	Butyrate	0.182835	9.23e-09	non-Obese	3.58e-08	***			ASV8565.Ruminococcaceae	Acetate	-0.266053	2.89e-07	Jamaica	1.37e-06	***
ASV7064.Subdoligranulum	Propionate	0.0254133	0.495676	Obese	0.605491				ASV8565.Ruminococcaceae	Acetate	-0.012762	0.817893	Seychelles	0.863331
ASV7064.Subdoligranulum	Propionate	0.0199462	0.534308	non-Obese	0.571157				ASV8565.Ruminococcaceae	Butyrate	0.16297	0.00445356	USA	0.0564118
ASV7064.Subdoligranulum	Valerate	-0.00265164	0.943337	Obese	0.943337				ASV8565.Ruminococcaceae	Butyrate	0.138057	0.00750039	South Africa	0.163591
ASV7064.Subdoligranulum	Valerate	0.0299349	0.35094	non-Obese	0.435166				ASV8565.Ruminococcaceae	Butyrate	0.0283918	0.608415	Ghana	0.700599
ASV7064.Subdoligranulum	TotalSCFA	0.10748	0.00387627	Obese	0.00924341	**			ASV8565.Ruminococcaceae	Butyrate	0.115262	0.0285473	Jamaica	0.0602666
ASV7064.Subdoligranulum	TotalSCFA	0.0697696	0.0295423	non-Obese	0.0398179	*			ASV8565.Ruminococcaceae	Butyrate	0.0349738	0.527924	Seychelles	0.7104
ASV11443.Ruminococcus_torques	Acetate	-0.123872	0.000858	Obese	0.00332663	**			ASV8565.Ruminococcaceae	Propionate	0.112453	0.050515	USA	0.130735
ASV11443.Ruminococcus_torques	Acetate	-0.0391878	0.22198	non-Obese	0.284189				ASV8565.Ruminococcaceae	Propionate	-0.0284591	0.583252	South Africa	0.738786
ASV11443.Ruminococcus_torques	Butyrate	0.129585	0.000486	Obese	0.00115945	**			ASV8565.Ruminococcaceae	Propionate	-0.119431	0.0305818	Ghana	0.0553385
ASV11443.Ruminococcus_torques	Butyrate	0.14791	3.6e-06	non-Obese	7.44e-06	***			ASV8565.Ruminococcaceae	Propionate	-0.0863213	0.101531	Jamaica	0.175373
ASV11443.Ruminococcus_torques	Propionate	0.0819938	0.0276978	Obese	0.0429316	*			ASV8565.Ruminococcaceae	Propionate	0.0105498	0.849042	Seychelles	0.940232
ASV11443.Ruminococcus_torques	Propionate	0.0862672	0.00709207	non-Obese	0.0091606	**			ASV8565.Ruminococcaceae	Valerate	0.0663074	0.249855	USA	0.517917
ASV11443.Ruminococcus_torques	Valerate	0.140306	0.000157	Obese	0.000696	***			ASV8565.Ruminococcaceae	Valerate	0.0339334	0.512962	South Africa	0.609142
ASV11443.Ruminococcus_torques	Valerate	0.0351681	0.273111	non-Obese	0.366673				ASV8565.Ruminococcaceae	Valerate	0.125564	0.0229429	Ghana	0.0792574
ASV11443.Ruminococcus_torques	TotalSCFA	-0.0172438	0.643825	Obese	0.688226				ASV8565.Ruminococcaceae	Valerate	0.0567191	0.282469	Jamaica	0.357794
ASV11443.Ruminococcus_torques	TotalSCFA	0.0336593	0.294233	non-Obese	0.325758				ASV8565.Ruminococcaceae	Valerate	0.17668	0.00131397	Seychelles	0.0166436	*
ASV11443.Ruminococcus_torques	Acetate	-0.130002	0.000466	Obese	0.00240802	**			ASV8565.Ruminococcaceae	TotalSCFA	0.10082	0.0797511	USA	0.159502
ASV11443.Ruminococcus_torques	Acetate	-0.135891	2.11e-05	non-Obese	5.03e-05	***			ASV8565.Ruminococcaceae	TotalSCFA	0.0675928	0.192132	South Africa	0.36505
ASV11443.Ruminococcus_torques	Butyrate	0.00755006	0.839619	Obese	0.839619				ASV8565.Ruminococcaceae	TotalSCFA	-0.088083	0.111327	Ghana	0.206509
ASV11443.Ruminococcus_torques	Butyrate	-0.0372805	0.245318	non-Obese	0.292494				ASV8565.Ruminococcaceae	TotalSCFA	-0.131676	0.0122772	Jamaica	0.0245544	*
ASV11443.Ruminococcus_torques	Propionate	-0.192991	1.77e-07	Obese	9.13e-07	***			ASV8565.Ruminococcaceae	TotalSCFA	0.00235564	0.9661	Seychelles	0.9661
ASV11443.Ruminococcus_torques	Propionate	-0.162241	3.62e-07	non-Obese	9.35e-07	***			ASV1853.Parabacteroides	Acetate	0.0395164	0.493166	USA	0.604526
ASV11443.Ruminococcus_torques	Valerate	0.188777	3.29e-07	Obese	1.7e-06	***			ASV1853.Parabacteroides	Acetate	-0.168183	0.001095	South Africa	0.0138699	*
ASV11443.Ruminococcus_torques	Valerate	0.238313	4.96e-14	non-Obese	3.08e-13	***			ASV1853.Parabacteroides	Acetate	0.000155	0.997775	Ghana	0.997775
ASV11443.Ruminococcus_torques	TotalSCFA	-0.130297	0.000457	Obese	0.00180342	**			ASV1853.Parabacteroides	Acetate	-0.0899195	0.0880075	Jamaica	0.095551
ASV11443.Ruminococcus_torques	TotalSCFA	-0.137726	1.62e-05	non-Obese	3.6e-05	***			ASV1853.Parabacteroides	Acetate	-0.176639	0.00131745	Seychelles	0.00217666	**
ASV6612.Eubacterium_hallii	Acetate	-0.0590561	0.113109	Obese	0.175318				ASV1853.Parabacteroides	Butyrate	-0.0339406	0.556177	USA	0.607339
ASV6612.Eubacterium_hallii	Acetate	0.00752914	0.814552	non-Obese	0.867704				ASV1853.Parabacteroides	Butyrate	-0.050256	0.332413	South Africa	0.622974
ASV6612.Eubacterium_hallii	Butyrate	0.145964	8.37e-05	Obese	0.000236	***			ASV1853.Parabacteroides	Butyrate	0.0477483	0.388716	Ghana	0.509352
ASV6612.Eubacterium_hallii	Butyrate	0.120697	0.000161	non-Obese	0.000262	***			ASV1853.Parabacteroides	Butyrate	-0.164204	0.00174607	Jamaica	0.00960946	**
ASV6612.Eubacterium_hallii	Propionate	0.0823643	0.0269997	Obese	0.0429316	*			ASV1853.Parabacteroides	Butyrate	-0.172192	0.00174782	Seychelles	0.031405	*
ASV6612.Eubacterium_hallii	Propionate	0.0525714	0.101237	non-Obese	0.116236				ASV1853.Parabacteroides	Propionate	-0.00473675	0.934558	USA	0.934558
ASV6612.Eubacterium_hallii	Valerate	0.0669127	0.0725587	Obese	0.112466				ASV1853.Parabacteroides	Propionate	-0.134682	0.00911271	South Africa	0.0346283	*
ASV6612.Eubacterium_hallii	Valerate	0.0385115	0.230066	non-Obese	0.324184				ASV1853.Parabacteroides	Propionate	-0.100287	0.0696905	Ghana	0.101855
ASV6612.Eubacterium_hallii	TotalSCFA	0.0402475	0.280396	Obese	0.362178				ASV1853.Parabacteroides	Propionate	-0.125278	0.0172464	Jamaica	0.0392823	*
ASV6612.Eubacterium_hallii	TotalSCFA	0.0485975	0.129812	non-Obese	0.154775				ASV1853.Parabacteroides	Propionate	-0.144439	0.00880148	Seychelles	0.0477795	*
ASV11293.Coprococcus	Acetate	0.0214212	0.565794	Obese	0.604814				ASV1853.Parabacteroides	Valerate	0.0357048	0.535826	USA	0.702116
ASV11293.Coprococcus	Acetate	0.0603434	0.0598926	non-Obese	0.0928335				ASV1853.Parabacteroides	Valerate	0.0035422	0.945568	South Africa	0.945568
ASV11293.Coprococcus	Butyrate	0.125102	0.000761	Obese	0.00168531	**			ASV1853.Parabacteroides	Valerate	0.0957953	0.083222	Ghana	0.180791
ASV11293.Coprococcus	Butyrate	0.173579	5.07e-08	non-Obese	1.43e-07	***			ASV1853.Parabacteroides	Valerate	0.086808	0.0996113	Jamaica	0.151409
ASV11293.Coprococcus	Propionate	0.103318	0.00548867	Obese	0.0100087	*			ASV1853.Parabacteroides	Valerate	0.0947823	0.0865494	Seychelles	0.270374
ASV11293.Coprococcus	Propionate	0.0963412	0.00262711	non-Obese	0.00354089	**			ASV1853.Parabacteroides	TotalSCFA	0.0187404	0.745263	USA	0.786667
ASV11293.Coprococcus	Valerate	0.0940263	0.0115382	Obese	0.0238457	*			ASV1853.Parabacteroides	TotalSCFA	-0.132643	0.0102296	South Africa	0.0777448
ASV11293.Coprococcus	Valerate	0.0934841	0.00351504	non-Obese	0.00990603	**			ASV1853.Parabacteroides	TotalSCFA	-0.0253208	0.647741	Ghana	0.819301
ASV11293.Coprococcus	TotalSCFA	0.0612355	0.100385	Obese	0.155596				ASV1853.Parabacteroides	TotalSCFA	-0.126263	0.0163818	Jamaica	0.0296433	*
ASV11293.Coprococcus	TotalSCFA	0.0887588	0.00559603	non-Obese	0.00867384	**			ASV1853.Parabacteroides	TotalSCFA	-0.182952	0.000872	Seychelles	0.0016567	**
ASV5592.Eubacterium_coprostanoligenes	Acetate	-0.0648868	0.081663	Obese	0.140642				ASV1716.Alistipes	Acetate	-0.214241	0.000172	USA	0.0032598	**
ASV5592.Eubacterium_coprostanoligenes	Acetate	-0.073958	0.0210458	non-Obese	0.0350318	*			ASV1716.Alistipes	Acetate	-0.0974081	0.0598421	South Africa	0.174923
ASV5592.Eubacterium_coprostanoligenes	Butyrate	-0.0325769	0.382417	Obese	0.439072				ASV1716.Alistipes	Acetate	-0.0139309	0.801544	Ghana	0.915352
ASV5592.Eubacterium_coprostanoligenes	Butyrate	-0.0351467	0.273404	non-Obese	0.308723				ASV1716.Alistipes	Acetate	0.00986811	0.851779	Jamaica	0.851779
ASV5592.Eubacterium_coprostanoligenes	Propionate	-0.0675935	0.0696918	Obese	0.0958793				ASV1716.Alistipes	Acetate	-0.114615	0.0380158	Seychelles	0.0473541	*
ASV5592.Eubacterium_coprostanoligenes	Propionate	-0.103801	0.00118507	non-Obese	0.00166987	**			ASV1716.Alistipes	Butyrate	-0.176696	0.00201958	USA	0.0383721	*
ASV5592.Eubacterium_coprostanoligenes	Valerate	0.28858	2.7e-15	Obese	3.24e-14	***			ASV1716.Alistipes	Butyrate	0.0487888	0.34674	South Africa	0.622974
ASV5592.Eubacterium_coprostanoligenes	Valerate	0.37808	2.01e-34	non-Obese	6.24e-33	***			ASV1716.Alistipes	Butyrate	0.130502	0.01805	Ghana	0.0761419
ASV5592.Eubacterium_coprostanoligenes	TotalSCFA	-0.07768	0.0370588	Obese	0.0714752				ASV1716.Alistipes	Butyrate	-0.0958515	0.0689033	Jamaica	0.124682
ASV5592.Eubacterium_coprostanoligenes	TotalSCFA	-0.0847497	0.00817018	non-Obese	0.0120607	*			ASV1716.Alistipes	Butyrate	-0.0494228	0.372279	Seychelles	0.589441
ASV5243.Collinsella	Acetate	0.0368283	0.323391	Obese	0.385582				ASV1716.Alistipes	Propionate	-0.243263	1.86e-05	USA	0.000706	***
ASV5243.Collinsella	Acetate	-0.0385844	0.229185	non-Obese	0.284189				ASV1716.Alistipes	Propionate	-0.118476	0.0219271	South Africa	0.0640947
ASV5243.Collinsella	Butyrate	0.105405	0.00460761	Obese	0.00793533	**			ASV1716.Alistipes	Propionate	-0.162247	0.00321136	Ghana	0.0196865	*
ASV5243.Collinsella	Butyrate	-0.0347508	0.278846	non-Obese	0.308723				ASV1716.Alistipes	Propionate	-0.128704	0.0144021	Jamaica	0.0364853	*
ASV5243.Collinsella	Propionate	0.141842	0.000133	Obese	0.000374	***			ASV1716.Alistipes	Propionate	-0.124157	0.0245317	Seychelles	0.0932206
ASV5243.Collinsella	Propionate	0.0153806	0.631812	non-Obese	0.652873				ASV1716.Alistipes	Valerate	0.0920204	0.109918	USA	0.357715
ASV5243.Collinsella	Valerate	0.0959059	0.00997525	Obese	0.022088	*			ASV1716.Alistipes	Valerate	-0.0832578	0.107938	South Africa	0.204215
ASV5243.Collinsella	Valerate	0.131904	3.67e-05	non-Obese	0.000142	***			ASV1716.Alistipes	Valerate	0.188834	0.000586	Ghana	0.00445614	**
ASV5243.Collinsella	TotalSCFA	0.115606	0.00188671	Obese	0.0058488	**			ASV1716.Alistipes	Valerate	0.163966	0.00177368	Jamaica	0.00674	**
ASV5243.Collinsella	TotalSCFA	-0.01236	0.700191	non-Obese	0.700191				ASV1716.Alistipes	Valerate	0.182198	0.000917	Seychelles	0.0166436	*
ASV3232.Streptococcus	Acetate	0.183978	6.56e-07	Obese	1.02e-05	***			ASV1716.Alistipes	TotalSCFA	-0.229185	5.66e-05	USA	0.00107505	**
ASV3232.Streptococcus	Acetate	0.277964	1.01e-18	non-Obese	1.56e-17	***			ASV1716.Alistipes	TotalSCFA	-0.0800207	0.122389	South Africa	0.290674
ASV3232.Streptococcus	Butyrate	0.149846	5.36e-05	Obese	0.000166	***			ASV1716.Alistipes	TotalSCFA	-0.0221191	0.689809	Ghana	0.819301
ASV3232.Streptococcus	Butyrate	0.174127	4.59e-08	non-Obese	1.42e-07	***			ASV1716.Alistipes	TotalSCFA	-0.0640004	0.225117	Jamaica	0.267326
ASV3232.Streptococcus	Propionate	0.212691	8.06e-09	Obese	8.32e-08	***			ASV1716.Alistipes	TotalSCFA	-0.116824	0.0344346	Seychelles	0.0467327	*
ASV3232.Streptococcus	Propionate	0.308261	7.28e-23	non-Obese	1.13e-21	***			ASV6437.Lachnospira	Acetate	0.179668	0.00168876	USA	0.0106955	*
ASV3232.Streptococcus	Valerate	-0.214263	6.21e-09	Obese	3.85e-08	***			ASV6437.Lachnospira	Acetate	0.139691	0.00681531	South Africa	0.0373513	*
ASV3232.Streptococcus	Valerate	-0.1892	2.72e-09	non-Obese	1.4e-08	***			ASV6437.Lachnospira	Acetate	0.291098	7.94e-08	Ghana	3.02e-06	***
ASV3232.Streptococcus	TotalSCFA	0.217373	4.06e-09	Obese	6.29e-08	***			ASV6437.Lachnospira	Acetate	0.173367	0.000941	Jamaica	0.00134946	**
ASV3232.Streptococcus	TotalSCFA	0.296984	2.9e-21	non-Obese	4.49e-20	***			ASV6437.Lachnospira	Acetate	0.121992	0.0271617	Seychelles	0.0355912	*
ASV12914.Fusicatenibacter	Acetate	-0.0732291	0.0493523	Obese	0.09562				ASV6437.Lachnospira	Butyrate	0.146858	0.0104771	USA	0.0572479
ASV12914.Fusicatenibacter	Acetate	-0.0737161	0.0214711	non-Obese	0.0350318	*			ASV6437.Lachnospira	Butyrate	0.116561	0.0241754	South Africa	0.163591
ASV12914.Fusicatenibacter	Butyrate	0.168316	5.52e-06	Obese	1.9e-05	***			ASV6437.Lachnospira	Butyrate	0.191469	0.000489	Ghana	0.0185816	*
ASV12914.Fusicatenibacter	Butyrate	0.126151	7.96e-05	non-Obese	0.000137	***			ASV6437.Lachnospira	Butyrate	0.12017	0.022395	Jamaica	0.0500595
ASV12914.Fusicatenibacter	Propionate	-0.00850523	0.819657	Obese	0.846071				ASV6437.Lachnospira	Butyrate	0.111714	0.043193	Seychelles	0.234476
ASV12914.Fusicatenibacter	Propionate	-0.00465652	0.88466	non-Obese	0.88466				ASV6437.Lachnospira	Propionate	0.100352	0.0811594	USA	0.171336
ASV12914.Fusicatenibacter	Valerate	-0.0197587	0.596333	Obese	0.772908				ASV6437.Lachnospira	Propionate	0.136379	0.00826688	South Africa	0.0346283	*
ASV12914.Fusicatenibacter	Valerate	-0.0193922	0.545724	non-Obese	0.626572				ASV6437.Lachnospira	Propionate	0.238263	1.29e-05	Ghana	0.000245	***
ASV12914.Fusicatenibacter	TotalSCFA	-0.00923998	0.804334	Obese	0.831145				ASV6437.Lachnospira	Propionate	0.0978634	0.0632518	Jamaica	0.114456
ASV12914.Fusicatenibacter	TotalSCFA	-0.0282318	0.379034	non-Obese	0.405175				ASV6437.Lachnospira	Propionate	0.163829	0.00292161	Seychelles	0.0277553	*
ASV12167.Lachnospiraceae	Acetate	0.101961	0.00614031	Obese	0.019035	*			ASV6437.Lachnospira	Valerate	-0.142261	0.0131863	USA	0.12527
ASV12167.Lachnospiraceae	Acetate	0.171451	7.4e-08	non-Obese	2.87e-07	***			ASV6437.Lachnospira	Valerate	-0.161448	0.00173393	South Africa	0.00732102	**
ASV12167.Lachnospiraceae	Butyrate	0.0291776	0.434057	Obese	0.480563				ASV6437.Lachnospira	Valerate	-0.360513	1.67e-11	Ghana	3.18e-10	***
ASV12167.Lachnospiraceae	Butyrate	0.115761	0.000296	non-Obese	0.000459	***			ASV6437.Lachnospira	Valerate	-0.179248	0.000622	Jamaica	0.00337888	**
ASV12167.Lachnospiraceae	Propionate	0.0990597	0.00777172	Obese	0.0133846	*			ASV6437.Lachnospira	Valerate	-0.0449742	0.416896	Seychelles	0.660085
ASV12167.Lachnospiraceae	Propionate	0.131403	3.93e-05	non-Obese	8.13e-05	***			ASV6437.Lachnospira	TotalSCFA	0.161057	0.00494987	USA	0.0313492	*
ASV12167.Lachnospiraceae	Valerate	-0.0765035	0.040007	Obese	0.0689009				ASV6437.Lachnospira	TotalSCFA	0.125223	0.0153875	South Africa	0.0974545
ASV12167.Lachnospiraceae	Valerate	-0.0464396	0.147755	non-Obese	0.241074				ASV6437.Lachnospira	TotalSCFA	0.275426	4.03e-07	Ghana	1.53e-05	***
ASV12167.Lachnospiraceae	TotalSCFA	0.0768253	0.0391961	Obese	0.0714752				ASV6437.Lachnospira	TotalSCFA	0.155325	0.00308718	Jamaica	0.00837949	**
ASV12167.Lachnospiraceae	TotalSCFA	0.155872	1.03e-06	non-Obese	2.9e-06	***			ASV6437.Lachnospira	TotalSCFA	0.143909	0.00905572	Seychelles	0.0149616	*
ASV11120.Anaerostipes	Acetate	-0.138422	0.000193	Obese	0.00149371	**			ASV9102.Colidextribacter	Acetate	-0.0229191	0.691106	USA	0.772413
ASV11120.Anaerostipes	Acetate	-0.170703	8.45e-08	non-Obese	2.91e-07	***			ASV9102.Colidextribacter	Acetate	0.106457	0.0396145	South Africa	0.13685
ASV11120.Anaerostipes	Butyrate	0.0535979	0.150514	Obese	0.179459				ASV9102.Colidextribacter	Acetate	0.0652848	0.238357	Ghana	0.663677
ASV11120.Anaerostipes	Butyrate	-0.00759729	0.812905	non-Obese	0.845454				ASV9102.Colidextribacter	Acetate	-0.145303	0.00567689	Jamaica	0.00695877	**
ASV11120.Anaerostipes	Propionate	-0.126945	0.000634	Obese	0.00131056	**			ASV9102.Colidextribacter	Acetate	0.000855	0.98769	Seychelles	0.98769
ASV11120.Anaerostipes	Propionate	-0.126565	7.53e-05	non-Obese	0.00013	***			ASV9102.Colidextribacter	Butyrate	-0.109636	0.0566135	USA	0.165486
ASV11120.Anaerostipes	Valerate	-0.00337123	0.927997	Obese	0.943337				ASV9102.Colidextribacter	Butyrate	0.115248	0.0258302	South Africa	0.163591
ASV11120.Anaerostipes	Valerate	0.0343897	0.283876	non-Obese	0.366673				ASV9102.Colidextribacter	Butyrate	-0.0554438	0.316795	Ghana	0.429936
ASV11120.Anaerostipes	TotalSCFA	-0.110699	0.00293027	Obese	0.00756987	**			ASV9102.Colidextribacter	Butyrate	-0.0412762	0.434297	Jamaica	0.493167
ASV11120.Anaerostipes	TotalSCFA	-0.142587	8.01e-06	non-Obese	2.07e-05	***			ASV9102.Colidextribacter	Butyrate	-0.0052045	0.92519	Seychelles	0.947379
ASV551.Bacteroides	Acetate	-0.143466	0.000111	Obese	0.00114516	**			ASV9102.Colidextribacter	Propionate	-0.124756	0.0299212	USA	0.105277
ASV551.Bacteroides	Acetate	-0.147005	4.13e-06	non-Obese	1.28e-05	***			ASV9102.Colidextribacter	Propionate	-0.0463397	0.37151	South Africa	0.631547
ASV551.Bacteroides	Butyrate	-0.18475	5.88e-07	Obese	3.04e-06	***			ASV9102.Colidextribacter	Propionate	-0.0473765	0.392424	Ghana	0.451882
ASV551.Bacteroides	Butyrate	-0.158955	6.24e-07	non-Obese	1.61e-06	***			ASV9102.Colidextribacter	Propionate	-0.0680936	0.196777	Jamaica	0.287597
ASV551.Bacteroides	Propionate	-0.308493	2.32e-17	Obese	7.18e-16	***			ASV9102.Colidextribacter	Propionate	0.0374367	0.499259	Seychelles	0.729686
ASV551.Bacteroides	Propionate	-0.210418	3.37e-11	non-Obese	1.74e-10	***			ASV9102.Colidextribacter	Valerate	0.0638727	0.267705	USA	0.517917
ASV551.Bacteroides	Valerate	0.101923	0.00615926	Obese	0.0159114	*			ASV9102.Colidextribacter	Valerate	0.12564	0.0150464	South Africa	0.0408402	*
ASV551.Bacteroides	Valerate	0.0788707	0.0138597	non-Obese	0.0306892	*			ASV9102.Colidextribacter	Valerate	0.0822371	0.137224	Ghana	0.217271
ASV551.Bacteroides	TotalSCFA	-0.239784	7.94e-11	Obese	2.46e-09	***			ASV9102.Colidextribacter	Valerate	0.141983	0.00689175	Jamaica	0.0218239	*
ASV551.Bacteroides	TotalSCFA	-0.188739	2.97e-09	non-Obese	1.15e-08	***			ASV9102.Colidextribacter	Valerate	0.0383495	0.488848	Seychelles	0.71447
ASV884.Prevotella	Acetate	0.189826	2.82e-07	Obese	8.75e-06	***			ASV9102.Colidextribacter	TotalSCFA	-0.0782837	0.174105	USA	0.275666
ASV884.Prevotella	Acetate	0.29758	2.4e-21	non-Obese	7.43e-20	***			ASV9102.Colidextribacter	TotalSCFA	0.0487947	0.346681	South Africa	0.470495
ASV884.Prevotella	Butyrate	0.0679633	0.0681739	Obese	0.0960632				ASV9102.Colidextribacter	TotalSCFA	-0.00935982	0.865899	Ghana	0.964369
ASV884.Prevotella	Butyrate	0.211958	2.4e-11	non-Obese	1.19e-10	***			ASV9102.Colidextribacter	TotalSCFA	-0.10971	0.0372008	Jamaica	0.0589013
ASV884.Prevotella	Propionate	0.2706	1.45e-13	Obese	2.25e-12	***			ASV9102.Colidextribacter	TotalSCFA	0.0277228	0.616892	Seychelles	0.652122
ASV884.Prevotella	Propionate	0.378604	1.61e-34	non-Obese	4.98e-33	***			ASV8819.Oscillospirales_UCG.010	Acetate	-0.0432464	0.45324	USA	0.574104
ASV884.Prevotella	Valerate	0.0051876	0.889408	Obese	0.943337				ASV8819.Oscillospirales_UCG.010	Acetate	-0.148055	0.00411122	South Africa	0.0312453	*
ASV884.Prevotella	Valerate	-0.024605	0.4433	non-Obese	0.52855				ASV8819.Oscillospirales_UCG.010	Acetate	-0.176299	0.00134656	Ghana	0.0255847	*
ASV884.Prevotella	TotalSCFA	0.194491	1.5e-07	Obese	1.55e-06	***			ASV8819.Oscillospirales_UCG.010	Acetate	-0.174364	0.000878	Jamaica	0.00133459	**
ASV884.Prevotella	TotalSCFA	0.331055	2.56e-26	non-Obese	7.95e-25	***			ASV8819.Oscillospirales_UCG.010	Acetate	0.00669555	0.903849	Seychelles	0.928278
ASV10205.Holdemanella	Acetate	-0.0575475	0.122629	Obese	0.181024				ASV8819.Oscillospirales_UCG.010	Butyrate	-0.0741143	0.198255	USA	0.330713
ASV10205.Holdemanella	Acetate	0.0494562	0.12316	non-Obese	0.173544				ASV8819.Oscillospirales_UCG.010	Butyrate	-0.0579077	0.263964	South Africa	0.622974
ASV10205.Holdemanella	Butyrate	0.108415	0.00356091	Obese	0.00689926	**			ASV8819.Oscillospirales_UCG.010	Butyrate	-0.0957803	0.0832705	Ghana	0.166541
ASV10205.Holdemanella	Butyrate	0.155046	1.18e-06	non-Obese	2.61e-06	***			ASV8819.Oscillospirales_UCG.010	Butyrate	-0.134314	0.0106277	Jamaica	0.0269236	*
ASV10205.Holdemanella	Propionate	0.17215	3.33e-06	Obese	1.29e-05	***			ASV8819.Oscillospirales_UCG.010	Butyrate	-0.161759	0.00330579	Seychelles	0.031405	*
ASV10205.Holdemanella	Propionate	0.17695	2.75e-08	non-Obese	8.54e-08	***			ASV8819.Oscillospirales_UCG.010	Propionate	-0.184987	0.00121768	USA	0.011568	*
ASV10205.Holdemanella	Valerate	0.0295269	0.428572	Obese	0.603897				ASV8819.Oscillospirales_UCG.010	Propionate	-0.267776	1.46e-07	South Africa	5.55e-06	***
ASV10205.Holdemanella	Valerate	0.0514867	0.108489	non-Obese	0.197833				ASV8819.Oscillospirales_UCG.010	Propionate	-0.303061	2.14e-08	Ghana	8.15e-07	***
ASV10205.Holdemanella	TotalSCFA	0.0492027	0.186899	Obese	0.263358				ASV8819.Oscillospirales_UCG.010	Propionate	-0.192024	0.000243	Jamaica	0.00141504	**
ASV10205.Holdemanella	TotalSCFA	0.121097	0.000153	non-Obese	0.000296	***			ASV8819.Oscillospirales_UCG.010	Propionate	-0.102264	0.064333	Seychelles	0.152191
ASV8198.Romboutsia	Acetate	0.0525897	0.158352	Obese	0.223133				ASV8819.Oscillospirales_UCG.010	Valerate	0.0870309	0.13065	USA	0.357715
ASV8198.Romboutsia	Acetate	0.192374	1.45e-09	non-Obese	6.43e-09	***			ASV8819.Oscillospirales_UCG.010	Valerate	0.330959	5.21e-11	South Africa	1.98e-09	***
ASV8198.Romboutsia	Butyrate	0.180697	1.04e-06	Obese	4.61e-06	***			ASV8819.Oscillospirales_UCG.010	Valerate	0.470507	1.8e-19	Ghana	6.82e-18	***
ASV8198.Romboutsia	Butyrate	0.177934	2.3e-08	non-Obese	7.92e-08	***			ASV8819.Oscillospirales_UCG.010	Valerate	0.265651	3.02e-07	Jamaica	3.83e-06	***
ASV8198.Romboutsia	Propionate	0.132626	0.000356	Obese	0.000788	***			ASV8819.Oscillospirales_UCG.010	Valerate	0.20966	0.000131	Seychelles	0.00496506	**
ASV8198.Romboutsia	Propionate	0.163813	2.78e-07	non-Obese	7.83e-07	***			ASV8819.Oscillospirales_UCG.010	TotalSCFA	-0.081174	0.158695	USA	0.262192
ASV8198.Romboutsia	Valerate	0.0748063	0.0446448	Obese	0.0728415				ASV8819.Oscillospirales_UCG.010	TotalSCFA	-0.177354	0.00057	South Africa	0.0154605	*
ASV8198.Romboutsia	Valerate	-0.0168653	0.599278	non-Obese	0.640607				ASV8819.Oscillospirales_UCG.010	TotalSCFA	-0.236828	1.46e-05	Ghana	0.000277	***
ASV8198.Romboutsia	TotalSCFA	0.130115	0.000465	Obese	0.00180342	**			ASV8819.Oscillospirales_UCG.010	TotalSCFA	-0.181519	0.000529	Jamaica	0.00200935	**
ASV8198.Romboutsia	TotalSCFA	0.205006	1.08e-10	non-Obese	5.58e-10	***			ASV8819.Oscillospirales_UCG.010	TotalSCFA	-0.0317633	0.566505	Seychelles	0.633153
ASV4633.UCG.002	Acetate	-0.130843	0.000428	Obese	0.00240802	**			ASV6820.Ruminococcaceae.UBA1819	Acetate	-0.133899	0.01972	USA	0.0535256
ASV4633.UCG.002	Acetate	-0.144384	6.13e-06	non-Obese	1.73e-05	***			ASV6820.Ruminococcaceae.UBA1819	Acetate	-0.00466076	0.92842	South Africa	0.944523
ASV4633.UCG.002	Butyrate	-0.115079	0.00196837	Obese	0.00406796	**			ASV6820.Ruminococcaceae.UBA1819	Acetate	-0.000676	0.990262	Ghana	0.997775
ASV4633.UCG.002	Butyrate	-0.0994635	0.00189459	non-Obese	0.00279678	**			ASV6820.Ruminococcaceae.UBA1819	Acetate	-0.238699	4.52e-06	Jamaica	1.01e-05	***
ASV4633.UCG.002	Propionate	-0.185635	5.18e-07	Obese	2.29e-06	***			ASV6820.Ruminococcaceae.UBA1819	Acetate	0.0291736	0.598575	Seychelles	0.668995
ASV4633.UCG.002	Propionate	-0.212182	2.29e-11	non-Obese	1.42e-10	***			ASV6820.Ruminococcaceae.UBA1819	Butyrate	-0.136053	0.017812	USA	0.0676858
ASV4633.UCG.002	Valerate	0.287923	3.14e-15	Obese	3.24e-14	***			ASV6820.Ruminococcaceae.UBA1819	Butyrate	-0.0145028	0.779825	South Africa	0.92381
ASV4633.UCG.002	Valerate	0.370697	4.65e-33	non-Obese	7.22e-32	***			ASV6820.Ruminococcaceae.UBA1819	Butyrate	0.0433233	0.434221	Ghana	0.550013
ASV4633.UCG.002	TotalSCFA	-0.174421	2.55e-06	Obese	1.98e-05	***			ASV6820.Ruminococcaceae.UBA1819	Butyrate	0.0373371	0.479448	Jamaica	0.520543
ASV4633.UCG.002	TotalSCFA	-0.171802	6.96e-08	non-Obese	2.2e-07	***			ASV6820.Ruminococcaceae.UBA1819	Butyrate	-0.0829921	0.13364	Seychelles	0.338554
ASV8658.Ruminococcus	Acetate	0.0457114	0.220226	Obese	0.296826				ASV6820.Ruminococcaceae.UBA1819	Propionate	-0.12236	0.0332455	USA	0.105277
ASV8658.Ruminococcus	Acetate	0.200894	2.57e-10	non-Obese	1.59e-09	***			ASV6820.Ruminococcaceae.UBA1819	Propionate	-0.0792472	0.126055	South Africa	0.252111
ASV8658.Ruminococcus	Butyrate	0.106102	0.00434325	Obese	0.00792004	**			ASV6820.Ruminococcaceae.UBA1819	Propionate	0.0570795	0.302706	Ghana	0.369575
ASV8658.Ruminococcus	Butyrate	0.211481	2.67e-11	non-Obese	1.19e-10	***			ASV6820.Ruminococcaceae.UBA1819	Propionate	-0.0668299	0.205233	Jamaica	0.288847
ASV8658.Ruminococcus	Propionate	-0.0236303	0.526411	Obese	0.605491				ASV6820.Ruminococcaceae.UBA1819	Propionate	-0.0611005	0.269861	Seychelles	0.42498
ASV8658.Ruminococcus	Propionate	0.126894	7.21e-05	non-Obese	0.00013	***			ASV6820.Ruminococcaceae.UBA1819	Valerate	0.213144	0.000186	USA	0.00705194	**
ASV8658.Ruminococcus	Valerate	0.113949	0.00218125	Obese	0.00676188	**			ASV6820.Ruminococcaceae.UBA1819	Valerate	-0.0188032	0.717014	South Africa	0.756848
ASV8658.Ruminococcus	Valerate	0.159185	6.01e-07	non-Obese	2.66e-06	***			ASV6820.Ruminococcaceae.UBA1819	Valerate	-0.019908	0.71944	Ghana	0.71944
ASV8658.Ruminococcus	TotalSCFA	0.0236698	0.525629	Obese	0.6035				ASV6820.Ruminococcaceae.UBA1819	Valerate	0.230737	9.48e-06	Jamaica	9.01e-05	***
ASV8658.Ruminococcus	TotalSCFA	0.191513	1.72e-09	non-Obese	7.63e-09	***			ASV6820.Ruminococcaceae.UBA1819	Valerate	0.168979	0.00213515	Seychelles	0.0202839	*
ASV9465.Christensenellaceae_R.7	Acetate	-0.112855	0.00240723	Obese	0.00829157	**			ASV6820.Ruminococcaceae.UBA1819	TotalSCFA	-0.133132	0.0204404	USA	0.0863038
ASV9465.Christensenellaceae_R.7	Acetate	-0.102812	0.00132087	non-Obese	0.00240865	**			ASV6820.Ruminococcaceae.UBA1819	TotalSCFA	-0.0354149	0.494725	South Africa	0.64826
ASV9465.Christensenellaceae_R.7	Butyrate	-0.104683	0.00489679	Obese	0.00798951	**			ASV6820.Ruminococcaceae.UBA1819	TotalSCFA	0.0537408	0.331911	Ghana	0.467134
ASV9465.Christensenellaceae_R.7	Butyrate	-0.0709288	0.0269375	non-Obese	0.0363071	*			ASV6820.Ruminococcaceae.UBA1819	TotalSCFA	-0.122843	0.019555	Jamaica	0.0337768	*
ASV9465.Christensenellaceae_R.7	Propionate	-0.198394	7.81e-08	Obese	4.84e-07	***			ASV6820.Ruminococcaceae.UBA1819	TotalSCFA	0.00468272	0.932671	Seychelles	0.957879
ASV9465.Christensenellaceae_R.7	Propionate	-0.207255	6.68e-11	non-Obese	2.96e-10	***			ASV6208.Eubacterium_siraeum	Acetate	0.026439	0.646666	USA	0.767916
ASV9465.Christensenellaceae_R.7	Valerate	0.322053	7.32e-19	Obese	2.27e-17	***			ASV6208.Eubacterium_siraeum	Acetate	-0.019925	0.700919	South Africa	0.832342
ASV9465.Christensenellaceae_R.7	Valerate	0.35723	1.17e-30	non-Obese	1.2e-29	***			ASV6208.Eubacterium_siraeum	Acetate	0.044995	0.41668	Ghana	0.71972
ASV9465.Christensenellaceae_R.7	TotalSCFA	-0.152875	3.83e-05	Obese	0.000238	***			ASV6208.Eubacterium_siraeum	Acetate	-0.227267	1.3e-05	Jamaica	2.47e-05	***
ASV9465.Christensenellaceae_R.7	TotalSCFA	-0.136537	1.92e-05	non-Obese	3.98e-05	***			ASV6208.Eubacterium_siraeum	Acetate	0.24206	9.28e-06	Seychelles	4.41e-05	***
ASV12100.Roseburia	Acetate	0.0741803	0.046466	Obese	0.09562				ASV6208.Eubacterium_siraeum	Butyrate	-0.0437936	0.447539	USA	0.607339
ASV12100.Roseburia	Acetate	0.221158	3.03e-12	non-Obese	3.13e-11	***			ASV6208.Eubacterium_siraeum	Butyrate	-0.00673023	0.896786	South Africa	0.946608
ASV12100.Roseburia	Butyrate	0.0980961	0.00839363	Obese	0.0130101	*			ASV6208.Eubacterium_siraeum	Butyrate	0.143746	0.00913508	Ghana	0.0761419
ASV12100.Roseburia	Butyrate	0.229655	4.12e-13	non-Obese	3.19e-12	***			ASV6208.Eubacterium_siraeum	Butyrate	-0.0491994	0.35128	Jamaica	0.444954
ASV12100.Roseburia	Propionate	0.0798995	0.0319429	Obese	0.0471537	*			ASV6208.Eubacterium_siraeum	Butyrate	0.0844467	0.126939	Seychelles	0.338554
ASV12100.Roseburia	Propionate	0.243596	1.31e-14	non-Obese	1.35e-13	***			ASV6208.Eubacterium_siraeum	Propionate	-0.0950884	0.0985144	USA	0.187177
ASV12100.Roseburia	Valerate	-0.132587	0.000357	Obese	0.00138467	**			ASV6208.Eubacterium_siraeum	Propionate	-0.0883563	0.0879433	South Africa	0.196579
ASV12100.Roseburia	Valerate	-0.091599	0.00424199	non-Obese	0.0109585	*			ASV6208.Eubacterium_siraeum	Propionate	-0.158321	0.00404631	Ghana	0.0196865	*
ASV12100.Roseburia	TotalSCFA	0.0638421	0.0867063	Obese	0.141468				ASV6208.Eubacterium_siraeum	Propionate	-0.131743	0.0122326	Jamaica	0.0357567	*
ASV12100.Roseburia	TotalSCFA	0.240891	2.6e-14	non-Obese	2.69e-13	***			ASV6208.Eubacterium_siraeum	Propionate	0.0648842	0.241256	Seychelles	0.398598
ASV9733.Clostridium_ss_1	Acetate	0.0653735	0.0793957	Obese	0.140642				ASV6208.Eubacterium_siraeum	Valerate	-0.0664157	0.24908	USA	0.517917
ASV9733.Clostridium_ss_1	Acetate	0.206292	8.22e-11	non-Obese	6.37e-10	***			ASV6208.Eubacterium_siraeum	Valerate	-0.016837	0.745525	South Africa	0.765675
ASV9733.Clostridium_ss_1	Butyrate	0.192922	1.79e-07	Obese	1.38e-06	***			ASV6208.Eubacterium_siraeum	Valerate	0.0901062	0.103318	Ghana	0.186956
ASV9733.Clostridium_ss_1	Butyrate	0.253426	1e-15	non-Obese	3.11e-14	***			ASV6208.Eubacterium_siraeum	Valerate	0.111965	0.0334492	Jamaica	0.0706149
ASV9733.Clostridium_ss_1	Propionate	0.139567	0.00017	Obese	0.000406	***			ASV6208.Eubacterium_siraeum	Valerate	-0.0269588	0.626635	Seychelles	0.827194
ASV9733.Clostridium_ss_1	Propionate	0.202717	1.75e-10	non-Obese	6.79e-10	***			ASV6208.Eubacterium_siraeum	TotalSCFA	-0.0246004	0.669735	USA	0.734689
ASV9733.Clostridium_ss_1	Valerate	0.083662	0.0246729	Obese	0.0478036	*			ASV6208.Eubacterium_siraeum	TotalSCFA	-0.0550045	0.2887	South Africa	0.421946
ASV9733.Clostridium_ss_1	Valerate	0.0176134	0.583177	non-Obese	0.640607				ASV6208.Eubacterium_siraeum	TotalSCFA	-0.00244695	0.964787	Ghana	0.990863
ASV9733.Clostridium_ss_1	TotalSCFA	0.137679	0.000212	Obese	0.00109292	**			ASV6208.Eubacterium_siraeum	TotalSCFA	-0.174609	0.000863	Jamaica	0.00252319	**
ASV9733.Clostridium_ss_1	TotalSCFA	0.235727	9.42e-14	non-Obese	7.3e-13	***			ASV6208.Eubacterium_siraeum	TotalSCFA	0.197919	0.00031	Seychelles	0.000750418	***
ASV10605.Catenibacterium	Acetate	-0.0621272	0.0955299	Obese	0.155865				ASV5519.Eggerthella	Acetate	-0.0470273	0.41469	USA	0.557904
ASV10605.Catenibacterium	Acetate	-0.00649245	0.839713	non-Obese	0.867704				ASV5519.Eggerthella	Acetate	0.13953	0.00688051	South Africa	0.0373513	*
ASV10605.Catenibacterium	Butyrate	0.0662729	0.0753398	Obese	0.101545				ASV5519.Eggerthella	Acetate	0.0223101	0.687271	Ghana	0.842461
ASV10605.Catenibacterium	Butyrate	0.0654017	0.0413868	non-Obese	0.0513196				ASV5519.Eggerthella	Acetate	-0.173094	0.000959	Jamaica	0.00134946	**
ASV10605.Catenibacterium	Propionate	0.147239	7.24e-05	Obese	0.000224	***			ASV5519.Eggerthella	Acetate	0.19348	0.000425	Seychelles	0.000769	***
ASV10605.Catenibacterium	Propionate	0.110264	0.00057	non-Obese	0.000841	***			ASV5519.Eggerthella	Butyrate	-0.0331568	0.565339	USA	0.607339
ASV10605.Catenibacterium	Valerate	0.123604	0.000881	Obese	0.00303527	**			ASV5519.Eggerthella	Butyrate	0.118709	0.0216666	South Africa	0.163591
ASV10605.Catenibacterium	Valerate	0.127488	6.67e-05	non-Obese	0.00023	***			ASV5519.Eggerthella	Butyrate	0.15729	0.00429594	Ghana	0.0704971
ASV10605.Catenibacterium	TotalSCFA	0.0342754	0.358	Obese	0.44392				ASV5519.Eggerthella	Butyrate	0.18834	0.00032	Jamaica	0.00304292	**
ASV10605.Catenibacterium	TotalSCFA	0.0542179	0.0909733	non-Obese	0.112807				ASV5519.Eggerthella	Butyrate	0.0369569	0.504778	Seychelles	0.7104
ASV13125.Ruminococcus_gauvreauii	Acetate	-0.000282	0.993972	Obese	0.993972				ASV5519.Eggerthella	Propionate	0.0365424	0.526295	USA	0.617663
ASV13125.Ruminococcus_gauvreauii	Acetate	0.103849	0.0011788	non-Obese	0.00228392	**			ASV5519.Eggerthella	Propionate	0.102982	0.0465686	South Africa	0.1264
ASV13125.Ruminococcus_gauvreauii	Butyrate	0.22739	6.57e-10	Obese	1.31e-08	***			ASV5519.Eggerthella	Propionate	0.088211	0.110806	Ghana	0.15038
ASV13125.Ruminococcus_gauvreauii	Butyrate	0.23599	8.83e-14	non-Obese	9.12e-13	***			ASV5519.Eggerthella	Propionate	0.046737	0.375937	Jamaica	0.420165
ASV13125.Ruminococcus_gauvreauii	Propionate	0.163782	9.87e-06	Obese	3.4e-05	***			ASV5519.Eggerthella	Propionate	-0.034372	0.535054	Seychelles	0.753039
ASV13125.Ruminococcus_gauvreauii	Propionate	0.192833	1.33e-09	non-Obese	4.56e-09	***			ASV5519.Eggerthella	Valerate	-0.0550221	0.339816	USA	0.586955
ASV13125.Ruminococcus_gauvreauii	Valerate	0.0108406	0.771366	Obese	0.919706				ASV5519.Eggerthella	Valerate	-0.137014	0.00796894	South Africa	0.025235	*
ASV13125.Ruminococcus_gauvreauii	Valerate	-0.0087484	0.785205	non-Obese	0.792682				ASV5519.Eggerthella	Valerate	-0.202286	0.000226	Ghana	0.00214927	**
ASV13125.Ruminococcus_gauvreauii	TotalSCFA	0.0998255	0.00732778	Obese	0.0155612	*			ASV5519.Eggerthella	Valerate	-0.0656132	0.213622	Jamaica	0.279918
ASV13125.Ruminococcus_gauvreauii	TotalSCFA	0.171699	7.09e-08	non-Obese	2.2e-07	***			ASV5519.Eggerthella	Valerate	-0.129878	0.0186137	Seychelles	0.141464
ASV4386.UCG.005	Acetate	-0.0784578	0.0351785	Obese	0.0778952				ASV5519.Eggerthella	TotalSCFA	-0.0294649	0.609433	USA	0.701772
ASV4386.UCG.005	Acetate	-0.0323882	0.312855	non-Obese	0.373019				ASV5519.Eggerthella	TotalSCFA	0.116292	0.0245073	South Africa	0.13304
ASV4386.UCG.005	Butyrate	-0.0594698	0.110602	Obese	0.142861				ASV5519.Eggerthella	TotalSCFA	0.0948366	0.0863684	Ghana	0.172737
ASV4386.UCG.005	Butyrate	0.00638774	0.842264	non-Obese	0.845454				ASV5519.Eggerthella	TotalSCFA	-0.0117484	0.823962	Jamaica	0.869737
ASV4386.UCG.005	Propionate	-0.140389	0.000156	Obese	0.000402	***			ASV5519.Eggerthella	TotalSCFA	0.126493	0.0219435	Seychelles	0.0320713	*
ASV4386.UCG.005	Propionate	-0.121428	0.000147	non-Obese	0.000227	***			ASV10349.Clostridium_innocuum	Acetate	-0.116929	0.0419577	USA	0.0885773
ASV4386.UCG.005	Valerate	0.280452	1.69e-14	Obese	1.31e-13	***			ASV10349.Clostridium_innocuum	Acetate	0.0315334	0.54323	South Africa	0.665895
ASV4386.UCG.005	Valerate	0.330042	3.7e-26	non-Obese	2.87e-25	***			ASV10349.Clostridium_innocuum	Acetate	0.0431167	0.436418	Ghana	0.721038
ASV4386.UCG.005	TotalSCFA	-0.113369	0.00231078	Obese	0.0065122	**			ASV10349.Clostridium_innocuum	Acetate	-0.334569	6.86e-11	Jamaica	1.3e-09	***
ASV4386.UCG.005	TotalSCFA	-0.0574959	0.07303	non-Obese	0.0943305				ASV10349.Clostridium_innocuum	Acetate	0.112624	0.0415096	Seychelles	0.0492926	*
ASV196.Escherichia.Shigella	Acetate	0.0388453	0.297581	Obese	0.38302				ASV10349.Clostridium_innocuum	Butyrate	-0.107043	0.0627541	USA	0.165577
ASV196.Escherichia.Shigella	Acetate	0.107816	0.000756	non-Obese	0.00156139	**			ASV10349.Clostridium_innocuum	Butyrate	0.0432846	0.403901	South Africa	0.638205
ASV196.Escherichia.Shigella	Butyrate	0.0246288	0.50908	Obese	0.544189				ASV10349.Clostridium_innocuum	Butyrate	0.126044	0.0224211	Ghana	0.0761419
ASV196.Escherichia.Shigella	Butyrate	0.0675286	0.0351946	non-Obese	0.0454597	*			ASV10349.Clostridium_innocuum	Butyrate	0.0822596	0.118723	Jamaica	0.180458
ASV196.Escherichia.Shigella	Propionate	-0.0188429	0.61347	Obese	0.655778				ASV10349.Clostridium_innocuum	Butyrate	-0.0476379	0.389815	Seychelles	0.592518
ASV196.Escherichia.Shigella	Propionate	0.0713773	0.0259843	non-Obese	0.0322205	*			ASV10349.Clostridium_innocuum	Propionate	-0.0565534	0.326526	USA	0.427862
ASV196.Escherichia.Shigella	Valerate	0.00527741	0.887506	Obese	0.943337				ASV10349.Clostridium_innocuum	Propionate	-0.0169416	0.743999	South Africa	0.883499
ASV196.Escherichia.Shigella	Valerate	0.0450591	0.16019	non-Obese	0.248295				ASV10349.Clostridium_innocuum	Propionate	0.120088	0.0296714	Ghana	0.0553385
ASV196.Escherichia.Shigella	TotalSCFA	0.0176783	0.635493	Obese	0.688226				ASV10349.Clostridium_innocuum	Propionate	-0.113181	0.0315631	Jamaica	0.0666331
ASV196.Escherichia.Shigella	TotalSCFA	0.0993007	0.0019276	non-Obese	0.00331975	**			ASV10349.Clostridium_innocuum	Propionate	-0.00437868	0.937033	Seychelles	0.940232
ASV8124.Lachnospiraceae_NK4A136	Acetate	0.0966479	0.00941206	Obese	0.0265249	*			ASV10349.Clostridium_innocuum	Valerate	0.0958778	0.0957382	USA	0.357715
ASV8124.Lachnospiraceae_NK4A136	Acetate	0.129908	4.82e-05	non-Obese	0.000107	***			ASV10349.Clostridium_innocuum	Valerate	-0.0376342	0.468064	South Africa	0.592881
ASV8124.Lachnospiraceae_NK4A136	Butyrate	0.0961407	0.00979384	Obese	0.0144576	*			ASV10349.Clostridium_innocuum	Valerate	-0.119301	0.0307651	Ghana	0.0974227
ASV8124.Lachnospiraceae_NK4A136	Butyrate	0.130656	4.35e-05	non-Obese	7.94e-05	***			ASV10349.Clostridium_innocuum	Valerate	0.0167789	0.7507	Jamaica	0.7507
ASV8124.Lachnospiraceae_NK4A136	Propionate	-0.0072424	0.846071	Obese	0.846071				ASV10349.Clostridium_innocuum	Valerate	-0.0658494	0.234313	Seychelles	0.423995
ASV8124.Lachnospiraceae_NK4A136	Propionate	0.0645442	0.0441319	non-Obese	0.0526188				ASV10349.Clostridium_innocuum	TotalSCFA	-0.106593	0.0638719	USA	0.134841
ASV8124.Lachnospiraceae_NK4A136	Valerate	0.0436949	0.241279	Obese	0.356174				ASV10349.Clostridium_innocuum	TotalSCFA	0.0255978	0.621686	South Africa	0.71706
ASV8124.Lachnospiraceae_NK4A136	Valerate	0.0657373	0.0403525	non-Obese	0.0833951				ASV10349.Clostridium_innocuum	TotalSCFA	0.114756	0.0377788	Ghana	0.105573
ASV8124.Lachnospiraceae_NK4A136	TotalSCFA	0.0514529	0.167517	Obese	0.247287				ASV10349.Clostridium_innocuum	TotalSCFA	-0.177444	0.000708	Jamaica	0.00244413	**
ASV8124.Lachnospiraceae_NK4A136	TotalSCFA	0.106247	0.000902	non-Obese	0.00164568	**			ASV10349.Clostridium_innocuum	TotalSCFA	0.0842615	0.127778	Seychelles	0.147138
ASV7981.Lachnoclostridium	Acetate	-0.0226576	0.543578	Obese	0.601819				ASV11827.Oribacterium	Acetate	0.18567	0.00116685	USA	0.00886803	**
ASV7981.Lachnoclostridium	Acetate	0.0220313	0.492448	non-Obese	0.54521				ASV11827.Oribacterium	Acetate	0.0710798	0.170141	South Africa	0.307874
ASV7981.Lachnoclostridium	Butyrate	-0.0538644	0.148492	Obese	0.179459				ASV11827.Oribacterium	Acetate	-0.0311106	0.574509	Ghana	0.76001
ASV7981.Lachnoclostridium	Butyrate	0.0062569	0.845454	non-Obese	0.845454				ASV11827.Oribacterium	Acetate	-0.0904284	0.0862175	Jamaica	0.095551
ASV7981.Lachnoclostridium	Propionate	0.0235759	0.527364	Obese	0.605491				ASV11827.Oribacterium	Acetate	0.245083	7.11e-06	Seychelles	3.86e-05	***
ASV7981.Lachnoclostridium	Propionate	0.125123	9.1e-05	non-Obese	0.000149	***			ASV11827.Oribacterium	Butyrate	0.138858	0.0155709	USA	0.0676858
ASV7981.Lachnoclostridium	Valerate	-0.0791723	0.0335416	Obese	0.0611642				ASV11827.Oribacterium	Butyrate	0.0184175	0.722578	South Africa	0.885741
ASV7981.Lachnoclostridium	Valerate	-0.116335	0.000276	non-Obese	0.000857	***			ASV11827.Oribacterium	Butyrate	-0.0317137	0.567111	Ghana	0.675995
ASV7981.Lachnoclostridium	TotalSCFA	-0.0460843	0.216425	Obese	0.291703				ASV11827.Oribacterium	Butyrate	0.143702	0.00623652	Jamaica	0.019749	*
ASV7981.Lachnoclostridium	TotalSCFA	0.0429983	0.1802	non-Obese	0.206896				ASV11827.Oribacterium	Butyrate	0.0896921	0.104919	Seychelles	0.332562
									ASV11827.Oribacterium	Propionate	0.135283	0.0184746	USA	0.0877542
									ASV11827.Oribacterium	Propionate	0.079438	0.125143	South Africa	0.252111
									ASV11827.Oribacterium	Propionate	-0.056085	0.311221	Ghana	0.369575
									ASV11827.Oribacterium	Propionate	0.0723317	0.170271	Jamaica	0.258812
									ASV11827.Oribacterium	Propionate	0.139104	0.0116708	Seychelles	0.0523377
									ASV11827.Oribacterium	Valerate	-0.063406	0.271224	USA	0.517917
									ASV11827.Oribacterium	Valerate	0.0703692	0.174462	South Africa	0.301344
									ASV11827.Oribacterium	Valerate	0.210211	0.000125	Ghana	0.00158726	**
									ASV11827.Oribacterium	Valerate	-0.0554111	0.293733	Jamaica	0.36006
									ASV11827.Oribacterium	Valerate	-0.102587	0.0634903	Seychelles	0.252996
									ASV11827.Oribacterium	TotalSCFA	0.174589	0.00228882	USA	0.017395	*
									ASV11827.Oribacterium	TotalSCFA	0.0642619	0.215017	South Africa	0.371393
									ASV11827.Oribacterium	TotalSCFA	-0.049654	0.370044	Ghana	0.502202
									ASV11827.Oribacterium	TotalSCFA	0.0252505	0.632528	Jamaica	0.706943
									ASV11827.Oribacterium	TotalSCFA	0.230243	2.55e-05	Seychelles	0.000138	***
									ASV5343.Libanicoccus	Acetate	0.189079	0.000941	USA	0.00886803	**
									ASV5343.Libanicoccus	Acetate	0.178766	0.000513	South Africa	0.0125429	*
									ASV5343.Libanicoccus	Acetate	-0.0194779	0.725254	Ghana	0.861239
									ASV5343.Libanicoccus	Acetate	-0.125796	0.0167873	Jamaica	0.0199349	*
									ASV5343.Libanicoccus	Acetate	0.277507	3.27e-07	Seychelles	6.21e-06	***
									ASV5343.Libanicoccus	Butyrate	0.137797	0.0163881	USA	0.0676858
									ASV5343.Libanicoccus	Butyrate	0.041719	0.421133	South Africa	0.638205
									ASV5343.Libanicoccus	Butyrate	0.023969	0.665376	Ghana	0.743656
									ASV5343.Libanicoccus	Butyrate	0.0895249	0.0894162	Jamaica	0.141576
									ASV5343.Libanicoccus	Butyrate	0.189801	0.000549	Seychelles	0.0208504	*
									ASV5343.Libanicoccus	Propionate	0.167277	0.00349656	USA	0.0265738	*
									ASV5343.Libanicoccus	Propionate	0.157191	0.00229816	South Africa	0.014555	*
									ASV5343.Libanicoccus	Propionate	0.101994	0.0650447	Ghana	0.101855
									ASV5343.Libanicoccus	Propionate	0.0622627	0.237987	Jamaica	0.291624
									ASV5343.Libanicoccus	Propionate	0.243326	8.3e-06	Seychelles	0.000158	***
									ASV5343.Libanicoccus	Valerate	-0.0920301	0.10988	USA	0.357715
									ASV5343.Libanicoccus	Valerate	0.03786	0.465398	South Africa	0.592881
									ASV5343.Libanicoccus	Valerate	0.0795709	0.150471	Ghana	0.218295
									ASV5343.Libanicoccus	Valerate	0.117606	0.0254491	Jamaica	0.0568862
									ASV5343.Libanicoccus	Valerate	-0.0158209	0.775298	Seychelles	0.839097
									ASV5343.Libanicoccus	TotalSCFA	0.197962	0.000528	USA	0.00501815	**
									ASV5343.Libanicoccus	TotalSCFA	0.151749	0.00326195	South Africa	0.0309885	*
									ASV5343.Libanicoccus	TotalSCFA	0.0437441	0.429765	Ghana	0.56314
									ASV5343.Libanicoccus	TotalSCFA	-0.00446363	0.932647	Jamaica	0.932647
									ASV5343.Libanicoccus	TotalSCFA	0.297399	4.01e-08	Seychelles	1.52e-06	***
									ASV4072.Christensenellaceae	Acetate	0.0085249	0.882515	USA	0.931544
									ASV4072.Christensenellaceae	Acetate	-0.0623733	0.228831	South Africa	0.3632
									ASV4072.Christensenellaceae	Acetate	-0.032455	0.558081	Ghana	0.76001
									ASV4072.Christensenellaceae	Acetate	-0.222027	2.07e-05	Jamaica	3.75e-05	***
									ASV4072.Christensenellaceae	Acetate	0.114254	0.0386309	Seychelles	0.0473541	*
									ASV4072.Christensenellaceae	Butyrate	-0.0407204	0.480076	USA	0.607339
									ASV4072.Christensenellaceae	Butyrate	-0.00928721	0.857931	South Africa	0.946608
									ASV4072.Christensenellaceae	Butyrate	-0.00652081	0.906347	Ghana	0.930843
									ASV4072.Christensenellaceae	Butyrate	-0.0711041	0.177659	Jamaica	0.250038
									ASV4072.Christensenellaceae	Butyrate	-0.0307029	0.579537	Seychelles	0.7104
									ASV4072.Christensenellaceae	Propionate	-0.123972	0.0309766	USA	0.105277
									ASV4072.Christensenellaceae	Propionate	-0.198031	0.000116	South Africa	0.00146488	**
									ASV4072.Christensenellaceae	Propionate	-0.0185459	0.737906	Ghana	0.778901
									ASV4072.Christensenellaceae	Propionate	-0.191076	0.000261	Jamaica	0.00141504	**
									ASV4072.Christensenellaceae	Propionate	0.00731938	0.894941	Seychelles	0.940232
									ASV4072.Christensenellaceae	Valerate	0.137298	0.0167846	USA	0.127563
									ASV4072.Christensenellaceae	Valerate	0.108842	0.0353686	South Africa	0.0840004
									ASV4072.Christensenellaceae	Valerate	0.0950566	0.085638	Ghana	0.180791
									ASV4072.Christensenellaceae	Valerate	0.293112	1.39e-08	Jamaica	2.68e-07	***
									ASV4072.Christensenellaceae	Valerate	0.0212678	0.701165	Seychelles	0.831267
									ASV4072.Christensenellaceae	TotalSCFA	-0.0313632	0.58657	USA	0.696552
									ASV4072.Christensenellaceae	TotalSCFA	-0.0906474	0.0799847	South Africa	0.233801
									ASV4072.Christensenellaceae	TotalSCFA	-0.0096851	0.861285	Ghana	0.964369
									ASV4072.Christensenellaceae	TotalSCFA	-0.18946	0.000294	Jamaica	0.00159866	**
									ASV4072.Christensenellaceae	TotalSCFA	0.0917873	0.0970158	Seychelles	0.118923
									ASV11529.Eisenbergiella	Acetate	-0.195533	0.00062	USA	0.00785491	**
									ASV11529.Eisenbergiella	Acetate	0.0391669	0.450126	South Africa	0.572538
									ASV11529.Eisenbergiella	Acetate	0.0598948	0.279443	Ghana	0.663677
									ASV11529.Eisenbergiella	Acetate	-0.290069	1.98e-08	Jamaica	1.51e-07	***
									ASV11529.Eisenbergiella	Acetate	0.106445	0.0541138	Seychelles	0.0623129
									ASV11529.Eisenbergiella	Butyrate	-0.21452	0.000168	USA	0.00639029	**
									ASV11529.Eisenbergiella	Butyrate	0.0466449	0.368365	South Africa	0.622974
									ASV11529.Eisenbergiella	Butyrate	0.11283	0.0411345	Ghana	0.0946815
									ASV11529.Eisenbergiella	Butyrate	0.00291496	0.955985	Jamaica	0.972765
									ASV11529.Eisenbergiella	Butyrate	-0.03183	0.565689	Seychelles	0.7104
									ASV11529.Eisenbergiella	Propionate	-0.189689	0.000905	USA	0.0114663	*
									ASV11529.Eisenbergiella	Propionate	0.00819453	0.874499	South Africa	0.936706
									ASV11529.Eisenbergiella	Propionate	0.131646	0.0170562	Ghana	0.0360076	*
									ASV11529.Eisenbergiella	Propionate	-0.155522	0.00304937	Jamaica	0.0115876	*
									ASV11529.Eisenbergiella	Propionate	-0.00863281	0.876228	Seychelles	0.940232
									ASV11529.Eisenbergiella	Valerate	0.154269	0.00713722	USA	0.0904048
									ASV11529.Eisenbergiella	Valerate	-0.133886	0.00953517	South Africa	0.027872	*
									ASV11529.Eisenbergiella	Valerate	-0.129632	0.0188398	Ghana	0.0785457
									ASV11529.Eisenbergiella	Valerate	0.1842	0.000435	Jamaica	0.00330685	**
									ASV11529.Eisenbergiella	Valerate	-0.0420397	0.447973	Seychelles	0.680918
									ASV11529.Eisenbergiella	TotalSCFA	-0.213689	0.000178	USA	0.00226092	**
									ASV11529.Eisenbergiella	TotalSCFA	0.0272686	0.59911	South Africa	0.71706
									ASV11529.Eisenbergiella	TotalSCFA	0.118545	0.031847	Ghana	0.100849
									ASV11529.Eisenbergiella	TotalSCFA	-0.187482	0.000341	Jamaica	0.00162206	**
									ASV11529.Eisenbergiella	TotalSCFA	0.0873927	0.114169	Seychelles	0.135575
									ASV10700.Allisonella	Acetate	0.271417	1.62e-06	USA	6.17e-05	***
									ASV10700.Allisonella	Acetate	0.052967	0.30696	South Africa	0.466579
									ASV10700.Allisonella	Acetate	0.0794835	0.150921	Ghana	0.637224
									ASV10700.Allisonella	Acetate	0.0572849	0.277687	Jamaica	0.293114
									ASV10700.Allisonella	Acetate	0.223484	4.43e-05	Seychelles	0.00012	***
									ASV10700.Allisonella	Butyrate	0.151689	0.00817309	USA	0.0572479
									ASV10700.Allisonella	Butyrate	0.0458048	0.377063	South Africa	0.622974
									ASV10700.Allisonella	Butyrate	-0.000327	0.995292	Ghana	0.995292
									ASV10700.Allisonella	Butyrate	0.145053	0.00576137	Jamaica	0.019749	*
									ASV10700.Allisonella	Butyrate	0.164627	0.00278459	Seychelles	0.031405	*
									ASV10700.Allisonella	Propionate	0.211273	0.000212	USA	0.00402735	**
									ASV10700.Allisonella	Propionate	0.193102	0.000172	South Africa	0.00163144	**
									ASV10700.Allisonella	Propionate	0.231226	2.35e-05	Ghana	0.000297	***
									ASV10700.Allisonella	Propionate	0.161653	0.0020628	Jamaica	0.00870959	**
									ASV10700.Allisonella	Propionate	0.270695	6.46e-07	Seychelles	2.45e-05	***
									ASV10700.Allisonella	Valerate	-0.046995	0.415011	USA	0.619473
									ASV10700.Allisonella	Valerate	-0.14236	0.00581626	South Africa	0.0200925	*
									ASV10700.Allisonella	Valerate	-0.0360896	0.514835	Ghana	0.558964
									ASV10700.Allisonella	Valerate	-0.0221239	0.675254	Jamaica	0.712768
									ASV10700.Allisonella	Valerate	-0.104436	0.0588434	Seychelles	0.252996
									ASV10700.Allisonella	TotalSCFA	0.244314	1.7e-05	USA	0.000648	***
									ASV10700.Allisonella	TotalSCFA	0.106238	0.0400253	South Africa	0.159771
									ASV10700.Allisonella	TotalSCFA	0.133457	0.01558	Ghana	0.0740048
									ASV10700.Allisonella	TotalSCFA	0.133075	0.0113763	Jamaica	0.0240165	*
									ASV10700.Allisonella	TotalSCFA	0.263728	1.27e-06	Seychelles	1.84e-05	***
									ASV7018.Fournierella	Acetate	0.0847954	0.140865	USA	0.240306
									ASV7018.Fournierella	Acetate	0.080963	0.118035	South Africa	0.249185
									ASV7018.Fournierella	Acetate	0.129011	0.0194212	Ghana	0.246002
									ASV7018.Fournierella	Acetate	-0.180264	0.000579	Jamaica	0.000956	***
									ASV7018.Fournierella	Acetate	0.227099	3.3e-05	Seychelles	9.65e-05	***
									ASV7018.Fournierella	Butyrate	0.0348554	0.545578	USA	0.607339
									ASV7018.Fournierella	Butyrate	0.128056	0.013197	South Africa	0.163591
									ASV7018.Fournierella	Butyrate	0.136978	0.0130272	Ghana	0.0761419
									ASV7018.Fournierella	Butyrate	0.0567173	0.282483	Jamaica	0.370151
									ASV7018.Fournierella	Butyrate	0.0945936	0.087181	Seychelles	0.331288
									ASV7018.Fournierella	Propionate	0.0283369	0.623202	USA	0.657824
									ASV7018.Fournierella	Propionate	-0.00412003	0.936706	South Africa	0.936706
									ASV7018.Fournierella	Propionate	0.0713618	0.197354	Ghana	0.258602
									ASV7018.Fournierella	Propionate	-0.0506475	0.337266	Jamaica	0.388367
									ASV7018.Fournierella	Propionate	0.11845	0.0319865	Seychelles	0.10129
									ASV7018.Fournierella	Valerate	0.00751483	0.896352	USA	0.920578
									ASV7018.Fournierella	Valerate	0.0502691	0.332287	South Africa	0.526122
									ASV7018.Fournierella	Valerate	0.101692	0.0658476	Ghana	0.159906
									ASV7018.Fournierella	Valerate	0.180647	0.000563	Jamaica	0.00337888	**
									ASV7018.Fournierella	Valerate	-0.0756917	0.171448	Seychelles	0.342897
									ASV7018.Fournierella	TotalSCFA	0.063434	0.271013	USA	0.367803
									ASV7018.Fournierella	TotalSCFA	0.0720228	0.164529	South Africa	0.34734
									ASV7018.Fournierella	TotalSCFA	0.120539	0.0290588	Ghana	0.100385
									ASV7018.Fournierella	TotalSCFA	-0.0865988	0.100433	Jamaica	0.127215
									ASV7018.Fournierella	TotalSCFA	0.215535	8.32e-05	Seychelles	0.000264	***
									ASV10805.Mitsuokella	Acetate	0.124412	0.0303811	USA	0.0721551
									ASV10805.Mitsuokella	Acetate	0.0454381	0.380899	South Africa	0.556698
									ASV10805.Mitsuokella	Acetate	0.0531392	0.337359	Ghana	0.666133
									ASV10805.Mitsuokella	Acetate	-0.104429	0.047401	Jamaica	0.054583
									ASV10805.Mitsuokella	Acetate	0.189014	0.000579	Seychelles	0.00100035	**
									ASV10805.Mitsuokella	Butyrate	0.09519	0.0981537	USA	0.202713
									ASV10805.Mitsuokella	Butyrate	0.0403395	0.436667	South Africa	0.638205
									ASV10805.Mitsuokella	Butyrate	-0.00835565	0.880171	Ghana	0.92907
									ASV10805.Mitsuokella	Butyrate	0.139851	0.00779008	Jamaica	0.022771	*
									ASV10805.Mitsuokella	Butyrate	0.0782934	0.157153	Seychelles	0.373238
									ASV10805.Mitsuokella	Propionate	0.104624	0.0689655	USA	0.163793
									ASV10805.Mitsuokella	Propionate	0.093711	0.0702643	South Africa	0.178003
									ASV10805.Mitsuokella	Propionate	0.143323	0.00934394	Ghana	0.0273131	*
									ASV10805.Mitsuokella	Propionate	0.0615291	0.243572	Jamaica	0.291624
									ASV10805.Mitsuokella	Propionate	0.137942	0.0123958	Seychelles	0.0523377
									ASV10805.Mitsuokella	Valerate	-0.109293	0.0573956	USA	0.311576
									ASV10805.Mitsuokella	Valerate	0.0226384	0.66255	South Africa	0.756848
									ASV10805.Mitsuokella	Valerate	0.0526992	0.341381	Ghana	0.381543
									ASV10805.Mitsuokella	Valerate	0.0338752	0.521145	Jamaica	0.607704
									ASV10805.Mitsuokella	Valerate	0.00720612	0.896557	Seychelles	0.920788
									ASV10805.Mitsuokella	TotalSCFA	0.12627	0.0279715	USA	0.0885764
									ASV10805.Mitsuokella	TotalSCFA	0.0700058	0.176704	South Africa	0.353407
									ASV10805.Mitsuokella	TotalSCFA	0.0874036	0.114123	Ghana	0.206509
									ASV10805.Mitsuokella	TotalSCFA	0.0183278	0.728554	Jamaica	0.791001
									ASV10805.Mitsuokella	TotalSCFA	0.196209	0.000351	Seychelles	0.000784	***
									ASV4953.Oscillospirales	Acetate	-0.0459207	0.425769	USA	0.557904
									ASV4953.Oscillospirales	Acetate	-0.0882865	0.0881953	South Africa	0.223428
									ASV4953.Oscillospirales	Acetate	0.00362801	0.947811	Ghana	0.997775
									ASV4953.Oscillospirales	Acetate	-0.310441	1.67e-09	Jamaica	1.58e-08	***
									ASV4953.Oscillospirales	Acetate	0.151419	0.00600124	Seychelles	0.00853488	**
									ASV4953.Oscillospirales	Butyrate	-0.0500312	0.385486	USA	0.553662
									ASV4953.Oscillospirales	Butyrate	-0.0937522	0.0701405	South Africa	0.333168
									ASV4953.Oscillospirales	Butyrate	0.0315383	0.569259	Ghana	0.675995
									ASV4953.Oscillospirales	Butyrate	-0.149235	0.00448921	Jamaica	0.019749	*
									ASV4953.Oscillospirales	Butyrate	-0.0425082	0.442924	Seychelles	0.647351
									ASV4953.Oscillospirales	Propionate	-0.144331	0.0118983	USA	0.0645907
									ASV4953.Oscillospirales	Propionate	-0.149166	0.00383679	South Africa	0.0182248	*
									ASV4953.Oscillospirales	Propionate	-0.0256243	0.643809	Ghana	0.698993
									ASV4953.Oscillospirales	Propionate	-0.277395	8.43e-08	Jamaica	3.2e-06	***
									ASV4953.Oscillospirales	Propionate	-0.0215758	0.697049	Seychelles	0.854447
									ASV4953.Oscillospirales	Valerate	0.0845801	0.14188	USA	0.35943
									ASV4953.Oscillospirales	Valerate	0.0199183	0.701015	South Africa	0.756848
									ASV4953.Oscillospirales	Valerate	0.0786806	0.155104	Ghana	0.218295
									ASV4953.Oscillospirales	Valerate	0.292987	1.41e-08	Jamaica	2.68e-07	***
									ASV4953.Oscillospirales	Valerate	0.0161172	0.771205	Seychelles	0.839097
									ASV4953.Oscillospirales	TotalSCFA	-0.0721621	0.210366	USA	0.319756
									ASV4953.Oscillospirales	TotalSCFA	-0.110515	0.0326263	South Africa	0.154975
									ASV4953.Oscillospirales	TotalSCFA	0.00601289	0.913612	Ghana	0.964369
									ASV4953.Oscillospirales	TotalSCFA	-0.286884	2.87e-08	Jamaica	5.46e-07	***
									ASV4953.Oscillospirales	TotalSCFA	0.113874	0.0392859	Seychelles	0.0497621	*
									ASV7679.Hungatella	Acetate	-0.143957	0.0121224	USA	0.0479253	*
									ASV7679.Hungatella	Acetate	0.00706933	0.891617	South Africa	0.944523
									ASV7679.Hungatella	Acetate	0.049853	0.368126	Ghana	0.666133
									ASV7679.Hungatella	Acetate	-0.405568	1e-15	Jamaica	3.81e-14	***
									ASV7679.Hungatella	Acetate	0.131576	0.0171158	Seychelles	0.0232286	*
									ASV7679.Hungatella	Butyrate	-0.0942986	0.101356	USA	0.202713
									ASV7679.Hungatella	Butyrate	-0.0234954	0.650606	South Africa	0.862099
									ASV7679.Hungatella	Butyrate	0.0881917	0.110885	Ghana	0.183201
									ASV7679.Hungatella	Butyrate	-0.134504	0.0105172	Jamaica	0.0269236	*
									ASV7679.Hungatella	Butyrate	-0.011572	0.834617	Seychelles	0.880984
									ASV7679.Hungatella	Propionate	-0.111929	0.0516061	USA	0.130735
									ASV7679.Hungatella	Propionate	-0.0322561	0.534022	South Africa	0.724745
									ASV7679.Hungatella	Propionate	0.134803	0.0145565	Ghana	0.0325381	*
									ASV7679.Hungatella	Propionate	-0.266691	2.7e-07	Jamaica	5.14e-06	***
									ASV7679.Hungatella	Propionate	0.0305875	0.580964	Seychelles	0.761264
									ASV7679.Hungatella	Valerate	0.16014	0.00520493	USA	0.0904048
									ASV7679.Hungatella	Valerate	-0.0622904	0.229451	South Africa	0.379093
									ASV7679.Hungatella	Valerate	-0.149322	0.00674423	Ghana	0.0427135	*
									ASV7679.Hungatella	Valerate	0.10147	0.0540777	Jamaica	0.093407
									ASV7679.Hungatella	Valerate	0.0265963	0.63128	Seychelles	0.827194
									ASV7679.Hungatella	TotalSCFA	-0.121433	0.0346126	USA	0.101175
									ASV7679.Hungatella	TotalSCFA	-0.0167324	0.747052	South Africa	0.811085
									ASV7679.Hungatella	TotalSCFA	0.111636	0.0433412	Ghana	0.105573
									ASV7679.Hungatella	TotalSCFA	-0.325502	2.35e-10	Jamaica	8.93e-09	***
									ASV7679.Hungatella	TotalSCFA	0.115846	0.035983	Seychelles	0.0471502	*
									ASV1762.Odoribacter	Acetate	0.0248092	0.667099	USA	0.768175
									ASV1762.Odoribacter	Acetate	0.0081541	0.875113	South Africa	0.944523
									ASV1762.Odoribacter	Acetate	-0.022489	0.684897	Ghana	0.842461
									ASV1762.Odoribacter	Acetate	-0.156265	0.00291044	Jamaica	0.00394988	**
									ASV1762.Odoribacter	Acetate	0.217922	6.9e-05	Seychelles	0.000164	***
									ASV1762.Odoribacter	Butyrate	-0.0328678	0.568735	USA	0.607339
									ASV1762.Odoribacter	Butyrate	0.00786042	0.879576	South Africa	0.946608
									ASV1762.Odoribacter	Butyrate	0.112162	0.0423575	Ghana	0.0946815
									ASV1762.Odoribacter	Butyrate	-0.0322462	0.54139	Jamaica	0.571467
									ASV1762.Odoribacter	Butyrate	0.069697	0.208038	Seychelles	0.390127
									ASV1762.Odoribacter	Propionate	-0.0635022	0.270497	USA	0.395342
									ASV1762.Odoribacter	Propionate	-0.00448934	0.931045	South Africa	0.936706
									ASV1762.Odoribacter	Propionate	-0.0435362	0.431963	Ghana	0.482782
									ASV1762.Odoribacter	Propionate	-0.0804817	0.126929	Jamaica	0.209709
									ASV1762.Odoribacter	Propionate	0.0321368	0.561948	Seychelles	0.761264
									ASV1762.Odoribacter	Valerate	-0.0445086	0.440152	USA	0.619473
									ASV1762.Odoribacter	Valerate	-0.0869844	0.0930057	South Africa	0.186011
									ASV1762.Odoribacter	Valerate	-0.0213329	0.700293	Ghana	0.71922
									ASV1762.Odoribacter	Valerate	0.0665604	0.207071	Jamaica	0.279918
									ASV1762.Odoribacter	Valerate	-0.0532229	0.336597	Seychelles	0.581396
									ASV1762.Odoribacter	TotalSCFA	-0.0123985	0.829818	USA	0.829818
									ASV1762.Odoribacter	TotalSCFA	0.00258955	0.960192	South Africa	0.986144
									ASV1762.Odoribacter	TotalSCFA	0.00673179	0.903332	Ghana	0.964369
									ASV1762.Odoribacter	TotalSCFA	-0.104653	0.0469248	Jamaica	0.0713257
									ASV1762.Odoribacter	TotalSCFA	0.177399	0.00125447	Seychelles	0.00226999	**
									ASV3904.Eubacterium	Acetate	-0.010201	0.859635	USA	0.931544
									ASV3904.Eubacterium	Acetate	0.0765638	0.139438	South Africa	0.264932
									ASV3904.Eubacterium	Acetate	0.0646928	0.242651	Ghana	0.663677
									ASV3904.Eubacterium	Acetate	-0.268873	2.14e-07	Jamaica	1.16e-06	***
									ASV3904.Eubacterium	Acetate	0.17327	0.00163308	Seychelles	0.00258571	**
									ASV3904.Eubacterium	Butyrate	-0.049205	0.393391	USA	0.553662
									ASV3904.Eubacterium	Butyrate	0.0525449	0.310837	South Africa	0.622974
									ASV3904.Eubacterium	Butyrate	0.135967	0.01372	Ghana	0.0761419
									ASV3904.Eubacterium	Butyrate	0.0936362	0.0755972	Jamaica	0.125516
									ASV3904.Eubacterium	Butyrate	-0.0188348	0.733976	Seychelles	0.796889
									ASV3904.Eubacterium	Propionate	-0.0314913	0.585042	USA	0.635188
									ASV3904.Eubacterium	Propionate	0.0504537	0.330513	South Africa	0.598071
									ASV3904.Eubacterium	Propionate	0.152341	0.00569874	Ghana	0.0196865	*
									ASV3904.Eubacterium	Propionate	-0.0648887	0.218732	Jamaica	0.291624
									ASV3904.Eubacterium	Propionate	-0.00700378	0.899446	Seychelles	0.940232
									ASV3904.Eubacterium	Valerate	-0.00109958	0.984792	USA	0.984792
									ASV3904.Eubacterium	Valerate	-0.100412	0.0523465	South Africa	0.116603
									ASV3904.Eubacterium	Valerate	-0.101521	0.0663045	Ghana	0.159906
									ASV3904.Eubacterium	Valerate	0.017182	0.744916	Jamaica	0.7507
									ASV3904.Eubacterium	Valerate	0.0835991	0.130811	Seychelles	0.292927
									ASV3904.Eubacterium	TotalSCFA	-0.0240513	0.676687	USA	0.734689
									ASV3904.Eubacterium	TotalSCFA	0.0645578	0.212908	South Africa	0.371393
									ASV3904.Eubacterium	TotalSCFA	0.139696	0.0113163	Ghana	0.0716696
									ASV3904.Eubacterium	TotalSCFA	-0.126419	0.0162489	Jamaica	0.0296433	*
									ASV3904.Eubacterium	TotalSCFA	0.132878	0.0160392	Seychelles	0.0243795	*
									ASV8650.Ruminococcaceae.DTU089	Acetate	0.126405	0.0278025	USA	0.0704331
									ASV8650.Ruminococcaceae.DTU089	Acetate	0.0820207	0.113293	South Africa	0.249185
									ASV8650.Ruminococcaceae.DTU089	Acetate	0.0887594	0.108597	Ghana	0.637224
									ASV8650.Ruminococcaceae.DTU089	Acetate	-0.146534	0.00527805	Jamaica	0.00668553	**
									ASV8650.Ruminococcaceae.DTU089	Acetate	0.199055	0.000286	Seychelles	0.000543	***
									ASV8650.Ruminococcaceae.DTU089	Butyrate	0.104344	0.0697168	USA	0.165577
									ASV8650.Ruminococcaceae.DTU089	Butyrate	0.0771669	0.136339	South Africa	0.518089
									ASV8650.Ruminococcaceae.DTU089	Butyrate	0.120622	0.0289482	Ghana	0.0785737
									ASV8650.Ruminococcaceae.DTU089	Butyrate	0.0712382	0.17684	Jamaica	0.250038
									ASV8650.Ruminococcaceae.DTU089	Butyrate	0.0252573	0.648566	Seychelles	0.75289
									ASV8650.Ruminococcaceae.DTU089	Propionate	0.0591366	0.304878	USA	0.420354
									ASV8650.Ruminococcaceae.DTU089	Propionate	0.0576024	0.266495	South Africa	0.50634
									ASV8650.Ruminococcaceae.DTU089	Propionate	0.143963	0.00902912	Ghana	0.0273131	*
									ASV8650.Ruminococcaceae.DTU089	Propionate	-0.124916	0.0175737	Jamaica	0.0392823	*
									ASV8650.Ruminococcaceae.DTU089	Propionate	0.0272251	0.623231	Seychelles	0.789426
									ASV8650.Ruminococcaceae.DTU089	Valerate	0.0632263	0.272588	USA	0.517917
									ASV8650.Ruminococcaceae.DTU089	Valerate	-0.192885	0.000175	South Africa	0.00221296	**
									ASV8650.Ruminococcaceae.DTU089	Valerate	-0.116392	0.0351124	Ghana	0.102636
									ASV8650.Ruminococcaceae.DTU089	Valerate	0.150699	0.00410795	Jamaica	0.0141911	*
									ASV8650.Ruminococcaceae.DTU089	Valerate	-0.0197266	0.72189	Seychelles	0.831267
									ASV8650.Ruminococcaceae.DTU089	TotalSCFA	0.109839	0.0561547	USA	0.127963
									ASV8650.Ruminococcaceae.DTU089	TotalSCFA	0.0739991	0.153222	South Africa	0.342496
									ASV8650.Ruminococcaceae.DTU089	TotalSCFA	0.142531	0.00974619	Ghana	0.0716696
									ASV8650.Ruminococcaceae.DTU089	TotalSCFA	-0.100068	0.0575039	Jamaica	0.0809314
									ASV8650.Ruminococcaceae.DTU089	TotalSCFA	0.164179	0.00286071	Seychelles	0.00494122	**
									ASV8996.Intestinimonas	Acetate	0.00481872	0.933428	USA	0.935283
									ASV8996.Intestinimonas	Acetate	0.01618	0.755132	South Africa	0.869546
									ASV8996.Intestinimonas	Acetate	0.114787	0.037726	Ghana	0.358397
									ASV8996.Intestinimonas	Acetate	-0.254318	9.78e-07	Jamaica	3.38e-06	***
									ASV8996.Intestinimonas	Acetate	0.162048	0.00324951	Seychelles	0.00493925	**
									ASV8996.Intestinimonas	Butyrate	-0.112738	0.0499291	USA	0.158109
									ASV8996.Intestinimonas	Butyrate	-0.0598142	0.248536	South Africa	0.622974
									ASV8996.Intestinimonas	Butyrate	0.123435	0.025383	Ghana	0.0761419
									ASV8996.Intestinimonas	Butyrate	-0.192819	0.000228	Jamaica	0.00289115	**
									ASV8996.Intestinimonas	Butyrate	0.0248528	0.653826	Seychelles	0.75289
									ASV8996.Intestinimonas	Propionate	-0.101729	0.0770511	USA	0.171336
									ASV8996.Intestinimonas	Propionate	-0.0353116	0.495986	South Africa	0.724745
									ASV8996.Intestinimonas	Propionate	0.15264	0.00560337	Ghana	0.0196865	*
									ASV8996.Intestinimonas	Propionate	-0.216597	3.32e-05	Jamaica	0.00042	***
									ASV8996.Intestinimonas	Propionate	0.00553731	0.920421	Seychelles	0.940232
									ASV8996.Intestinimonas	Valerate	0.0136201	0.813343	USA	0.883058
									ASV8996.Intestinimonas	Valerate	-0.15155	0.00330318	South Africa	0.0125521	*
									ASV8996.Intestinimonas	Valerate	-0.0878574	0.11225	Ghana	0.193886
									ASV8996.Intestinimonas	Valerate	0.136295	0.00952178	Jamaica	0.0258848	*
									ASV8996.Intestinimonas	Valerate	-0.101091	0.0674693	Seychelles	0.252996
									ASV8996.Intestinimonas	TotalSCFA	-0.0530369	0.357552	USA	0.452899
									ASV8996.Intestinimonas	TotalSCFA	-0.0284023	0.584004	South Africa	0.71706
									ASV8996.Intestinimonas	TotalSCFA	0.146362	0.00793285	Ghana	0.0716696
									ASV8996.Intestinimonas	TotalSCFA	-0.251343	1.32e-06	Jamaica	1.67e-05	***
									ASV8996.Intestinimonas	TotalSCFA	0.133951	0.015197	Seychelles	0.0240619	*
									ASV11840.Eubacterium_fissicatena	Acetate	-0.0955542	0.0968685	USA	0.193737
									ASV11840.Eubacterium_fissicatena	Acetate	0.0667994	0.197414	South Africa	0.340988
									ASV11840.Eubacterium_fissicatena	Acetate	0.0732929	0.185468	Ghana	0.640709
									ASV11840.Eubacterium_fissicatena	Acetate	-0.253114	1.1e-06	Jamaica	3.5e-06	***
									ASV11840.Eubacterium_fissicatena	Acetate	0.2302	2.56e-05	Seychelles	8.09e-05	***
									ASV11840.Eubacterium_fissicatena	Butyrate	-0.149679	0.00907033	USA	0.0572479
									ASV11840.Eubacterium_fissicatena	Butyrate	0.062091	0.230949	South Africa	0.622974
									ASV11840.Eubacterium_fissicatena	Butyrate	0.113032	0.0407718	Ghana	0.0946815
									ASV11840.Eubacterium_fissicatena	Butyrate	0.104873	0.0464623	Jamaica	0.0929246
									ASV11840.Eubacterium_fissicatena	Butyrate	0.0319337	0.564424	Seychelles	0.7104
									ASV11840.Eubacterium_fissicatena	Propionate	-0.0585469	0.309735	USA	0.420354
									ASV11840.Eubacterium_fissicatena	Propionate	0.0453092	0.382252	South Africa	0.631547
									ASV11840.Eubacterium_fissicatena	Propionate	0.135487	0.0140594	Ghana	0.0325381	*
									ASV11840.Eubacterium_fissicatena	Propionate	-0.0759722	0.149712	Jamaica	0.237044
									ASV11840.Eubacterium_fissicatena	Propionate	0.0691668	0.211527	Seychelles	0.365364
									ASV11840.Eubacterium_fissicatena	Valerate	0.0188081	0.744374	USA	0.857158
									ASV11840.Eubacterium_fissicatena	Valerate	-0.168507	0.00107057	South Africa	0.00508521	**
									ASV11840.Eubacterium_fissicatena	Valerate	-0.0916773	0.0974183	Ghana	0.186956
									ASV11840.Eubacterium_fissicatena	Valerate	0.136267	0.0095365	Jamaica	0.0258848	*
									ASV11840.Eubacterium_fissicatena	Valerate	-0.0334574	0.54598	Seychelles	0.768416
									ASV11840.Eubacterium_fissicatena	TotalSCFA	-0.109358	0.0572465	USA	0.127963
									ASV11840.Eubacterium_fissicatena	TotalSCFA	0.0563939	0.276674	South Africa	0.420545
									ASV11840.Eubacterium_fissicatena	TotalSCFA	0.134373	0.0148771	Ghana	0.0740048
									ASV11840.Eubacterium_fissicatena	TotalSCFA	-0.11711	0.0260791	Jamaica	0.0430872	*
									ASV11840.Eubacterium_fissicatena	TotalSCFA	0.197963	0.000309	Seychelles	0.000750418	***
									ASV6169.Anaerotruncus	Acetate	-0.0856095	0.137077	USA	0.240306
									ASV6169.Anaerotruncus	Acetate	0.039494	0.446348	South Africa	0.572538
									ASV6169.Anaerotruncus	Acetate	0.0508657	0.358465	Ghana	0.666133
									ASV6169.Anaerotruncus	Acetate	-0.320437	4.6e-10	Jamaica	5.82e-09	***
									ASV6169.Anaerotruncus	Acetate	0.208509	0.000143	Seychelles	0.000285	***
									ASV6169.Anaerotruncus	Butyrate	-0.105452	0.0667859	USA	0.165577
									ASV6169.Anaerotruncus	Butyrate	0.0129923	0.802256	South Africa	0.92381
									ASV6169.Anaerotruncus	Butyrate	0.0887746	0.108536	Ghana	0.183201
									ASV6169.Anaerotruncus	Butyrate	-0.0673576	0.201671	Jamaica	0.273696
									ASV6169.Anaerotruncus	Butyrate	0.0872484	0.11477	Seychelles	0.335481
									ASV6169.Anaerotruncus	Propionate	-0.115017	0.0454518	USA	0.130735
									ASV6169.Anaerotruncus	Propionate	0.0365398	0.481111	South Africa	0.724745
									ASV6169.Anaerotruncus	Propionate	0.136127	0.0136076	Ghana	0.0325381	*
									ASV6169.Anaerotruncus	Propionate	-0.20653	7.71e-05	Jamaica	0.000586	***
									ASV6169.Anaerotruncus	Propionate	0.101089	0.0674737	Seychelles	0.152191
									ASV6169.Anaerotruncus	Valerate	0.129849	0.0237901	USA	0.150671
									ASV6169.Anaerotruncus	Valerate	-0.198114	0.000115	South Africa	0.00218262	**
									ASV6169.Anaerotruncus	Valerate	-0.101143	0.0673288	Ghana	0.159906
									ASV6169.Anaerotruncus	Valerate	0.102909	0.05074	Jamaica	0.0918152
									ASV6169.Anaerotruncus	Valerate	-0.0907715	0.100786	Seychelles	0.273562
									ASV6169.Anaerotruncus	TotalSCFA	-0.095733	0.0962425	USA	0.182861
									ASV6169.Anaerotruncus	TotalSCFA	0.0241473	0.64158	South Africa	0.71706
									ASV6169.Anaerotruncus	TotalSCFA	0.11026	0.0460045	Ghana	0.105573
									ASV6169.Anaerotruncus	TotalSCFA	-0.245789	2.28e-06	Jamaica	2.17e-05	***
									ASV6169.Anaerotruncus	TotalSCFA	0.197668	0.000316	Seychelles	0.000750418	***
									ASV7151.Clostridia	Acetate	0.0670069	0.244883	USA	0.387731
									ASV7151.Clostridia	Acetate	0.10104	0.0508804	South Africa	0.161121
									ASV7151.Clostridia	Acetate	-0.0122605	0.82493	Ghana	0.915352
									ASV7151.Clostridia	Acetate	-0.240868	3.68e-06	Jamaica	8.73e-06	***
									ASV7151.Clostridia	Acetate	0.209217	0.000135	Seychelles	0.000285	***
									ASV7151.Clostridia	Butyrate	-0.00049	0.993219	USA	0.993219
									ASV7151.Clostridia	Butyrate	0.0320902	0.53613	South Africa	0.754553
									ASV7151.Clostridia	Butyrate	-0.00917411	0.868535	Ghana	0.92907
									ASV7151.Clostridia	Butyrate	-0.0474543	0.368647	Jamaica	0.451812
									ASV7151.Clostridia	Butyrate	0.0211918	0.702181	Seychelles	0.78479
									ASV7151.Clostridia	Propionate	-0.0342445	0.552646	USA	0.617663
									ASV7151.Clostridia	Propionate	0.00605296	0.907123	South Africa	0.936706
									ASV7151.Clostridia	Propionate	-0.00131564	0.981063	Ghana	0.981063
									ASV7151.Clostridia	Propionate	-0.135703	0.00984081	Jamaica	0.0311626	*
									ASV7151.Clostridia	Propionate	0.0705677	0.202399	Seychelles	0.365364
									ASV7151.Clostridia	Valerate	-0.00914027	0.874103	USA	0.920578
									ASV7151.Clostridia	Valerate	-0.08212	0.112856	South Africa	0.204215
									ASV7151.Clostridia	Valerate	0.0549763	0.320899	Ghana	0.381067
									ASV7151.Clostridia	Valerate	0.121466	0.0209772	Jamaica	0.0498209	*
									ASV7151.Clostridia	Valerate	-0.0457075	0.409332	Seychelles	0.660085
									ASV7151.Clostridia	TotalSCFA	0.0315644	0.58417	USA	0.696552
									ASV7151.Clostridia	TotalSCFA	0.056429	0.276375	South Africa	0.420545
									ASV7151.Clostridia	TotalSCFA	-0.000276	0.99602	Ghana	0.99602
									ASV7151.Clostridia	TotalSCFA	-0.175748	0.000797	Jamaica	0.00252319	**
									ASV7151.Clostridia	TotalSCFA	0.184775	0.000772	Seychelles	0.00154406	**
									ASV10394.Erysipelotrichaceae_UCG.006	Acetate	0.152693	0.00775508	USA	0.0368366	*
									ASV10394.Erysipelotrichaceae_UCG.006	Acetate	0.175321	0.00066	South Africa	0.0125429	*
									ASV10394.Erysipelotrichaceae_UCG.006	Acetate	0.0517156	0.35048	Ghana	0.666133
									ASV10394.Erysipelotrichaceae_UCG.006	Acetate	-0.147904	0.00486352	Jamaica	0.00637288	**
									ASV10394.Erysipelotrichaceae_UCG.006	Acetate	0.259463	1.91e-06	Seychelles	1.45e-05	***
									ASV10394.Erysipelotrichaceae_UCG.006	Butyrate	0.0799438	0.165124	USA	0.298795
									ASV10394.Erysipelotrichaceae_UCG.006	Butyrate	0.0855784	0.0984326	South Africa	0.415604
									ASV10394.Erysipelotrichaceae_UCG.006	Butyrate	0.0733061	0.185389	Ghana	0.270953
									ASV10394.Erysipelotrichaceae_UCG.006	Butyrate	0.179186	0.000625	Jamaica	0.0047514	**
									ASV10394.Erysipelotrichaceae_UCG.006	Butyrate	0.117402	0.0335467	Seychelles	0.212462
									ASV10394.Erysipelotrichaceae_UCG.006	Propionate	0.08568	0.136752	USA	0.247456
									ASV10394.Erysipelotrichaceae_UCG.006	Propionate	0.201541	8.68e-05	South Africa	0.00146488	**
									ASV10394.Erysipelotrichaceae_UCG.006	Propionate	0.100982	0.0677663	Ghana	0.101855
									ASV10394.Erysipelotrichaceae_UCG.006	Propionate	0.0620657	0.239478	Jamaica	0.291624
									ASV10394.Erysipelotrichaceae_UCG.006	Propionate	0.159697	0.00373367	Seychelles	0.0283759	*
									ASV10394.Erysipelotrichaceae_UCG.006	Valerate	-0.0867749	0.13179	USA	0.357715
									ASV10394.Erysipelotrichaceae_UCG.006	Valerate	-0.040677	0.432837	South Africa	0.587422
									ASV10394.Erysipelotrichaceae_UCG.006	Valerate	0.0558827	0.312972	Ghana	0.381067
									ASV10394.Erysipelotrichaceae_UCG.006	Valerate	0.0333409	0.527743	Jamaica	0.607704
									ASV10394.Erysipelotrichaceae_UCG.006	Valerate	-0.103481	0.0612065	Seychelles	0.252996
									ASV10394.Erysipelotrichaceae_UCG.006	TotalSCFA	0.128385	0.0254301	USA	0.0885764
									ASV10394.Erysipelotrichaceae_UCG.006	TotalSCFA	0.172405	0.000814	South Africa	0.0154605	*
									ASV10394.Erysipelotrichaceae_UCG.006	TotalSCFA	0.080047	0.148037	Ghana	0.2557
									ASV10394.Erysipelotrichaceae_UCG.006	TotalSCFA	0.0067561	0.898211	Jamaica	0.922487
									ASV10394.Erysipelotrichaceae_UCG.006	TotalSCFA	0.251994	3.82e-06	Seychelles	2.9e-05	***
									ASV3912.Anaerofustis	Acetate	0.0599597	0.298185	USA	0.452264
									ASV3912.Anaerofustis	Acetate	0.124417	0.0160654	South Africa	0.0687501
									ASV3912.Anaerofustis	Acetate	0.0406417	0.463225	Ghana	0.73344
									ASV3912.Anaerofustis	Acetate	-0.241437	3.48e-06	Jamaica	8.73e-06	***
									ASV3912.Anaerofustis	Acetate	0.29946	3.2e-08	Seychelles	1.22e-06	***
									ASV3912.Anaerofustis	Butyrate	0.0323052	0.575374	USA	0.607339
									ASV3912.Anaerofustis	Butyrate	0.0990694	0.0555935	South Africa	0.301793
									ASV3912.Anaerofustis	Butyrate	0.0919818	0.0963069	Ghana	0.182983
									ASV3912.Anaerofustis	Butyrate	0.144255	0.00603781	Jamaica	0.019749	*
									ASV3912.Anaerofustis	Butyrate	0.107952	0.0507788	Seychelles	0.239993
									ASV3912.Anaerofustis	Propionate	0.0549119	0.340786	USA	0.431662
									ASV3912.Anaerofustis	Propionate	0.0260861	0.615051	South Africa	0.753933
									ASV3912.Anaerofustis	Propionate	0.125434	0.0230854	Ghana	0.0461709	*
									ASV3912.Anaerofustis	Propionate	-0.034572	0.512606	Jamaica	0.556544
									ASV3912.Anaerofustis	Propionate	0.105918	0.0553243	Seychelles	0.152191
									ASV3912.Anaerofustis	Valerate	-0.0287208	0.618501	USA	0.783435
									ASV3912.Anaerofustis	Valerate	-0.117545	0.0229962	South Africa	0.058257
									ASV3912.Anaerofustis	Valerate	-0.0756808	0.171511	Ghana	0.224738
									ASV3912.Anaerofustis	Valerate	0.0226433	0.66808	Jamaica	0.712768
									ASV3912.Anaerofustis	Valerate	-0.0813436	0.141559	Seychelles	0.298848
									ASV3912.Anaerofustis	TotalSCFA	0.0558784	0.332342	USA	0.435483
									ASV3912.Anaerofustis	TotalSCFA	0.0875157	0.0910181	South Africa	0.243293
									ASV3912.Anaerofustis	TotalSCFA	0.110586	0.0453602	Ghana	0.105573
									ASV3912.Anaerofustis	TotalSCFA	-0.0897745	0.0885229	Jamaica	0.115996
									ASV3912.Anaerofustis	TotalSCFA	0.262341	1.45e-06	Seychelles	1.84e-05	***
									ASV7225.Christensenella	Acetate	0.13941	0.0151598	USA	0.0479253	*
									ASV7225.Christensenella	Acetate	0.0622987	0.229389	South Africa	0.3632
									ASV7225.Christensenella	Acetate	0.0831436	0.13293	Ghana	0.637224
									ASV7225.Christensenella	Acetate	-0.228802	1.13e-05	Jamaica	2.28e-05	***
									ASV7225.Christensenella	Acetate	0.236496	1.5e-05	Seychelles	5.19e-05	***
									ASV7225.Christensenella	Butyrate	0.0601203	0.29689	USA	0.451273
									ASV7225.Christensenella	Butyrate	0.0541512	0.296257	South Africa	0.622974
									ASV7225.Christensenella	Butyrate	0.126646	0.0217819	Ghana	0.0761419
									ASV7225.Christensenella	Butyrate	0.121705	0.0207233	Jamaica	0.0492179	*
									ASV7225.Christensenella	Butyrate	0.0511805	0.355494	Seychelles	0.589441
									ASV7225.Christensenella	Propionate	0.0697151	0.226286	USA	0.358287
									ASV7225.Christensenella	Propionate	-0.00450081	0.93087	South Africa	0.936706
									ASV7225.Christensenella	Propionate	0.152938	0.00550998	Ghana	0.0196865	*
									ASV7225.Christensenella	Propionate	-0.0310123	0.556981	Jamaica	0.587924
									ASV7225.Christensenella	Propionate	0.0853872	0.122747	Seychelles	0.259134
									ASV7225.Christensenella	Valerate	0.0872705	0.129589	USA	0.357715
									ASV7225.Christensenella	Valerate	-0.0459237	0.375824	South Africa	0.53704
									ASV7225.Christensenella	Valerate	-0.131726	0.0169881	Ghana	0.0785457
									ASV7225.Christensenella	Valerate	0.16577	0.00157448	Jamaica	0.00664779	**
									ASV7225.Christensenella	Valerate	-0.0675356	0.222523	Seychelles	0.422795
									ASV7225.Christensenella	TotalSCFA	0.111371	0.0527895	USA	0.127963
									ASV7225.Christensenella	TotalSCFA	0.0494481	0.340254	South Africa	0.470495
									ASV7225.Christensenella	TotalSCFA	0.139719	0.0113029	Ghana	0.0716696
									ASV7225.Christensenella	TotalSCFA	-0.0911151	0.0838485	Jamaica	0.113794
									ASV7225.Christensenella	TotalSCFA	0.20673	0.000163	Seychelles	0.000476	***
									ASV5929.Clostridium_methylpentosum	Acetate	0.00468412	0.935283	USA	0.935283
									ASV5929.Clostridium_methylpentosum	Acetate	0.0781272	0.131514	South Africa	0.263029
									ASV5929.Clostridium_methylpentosum	Acetate	0.076002	0.169694	Ghana	0.640709
									ASV5929.Clostridium_methylpentosum	Acetate	-0.269274	2.05e-07	Jamaica	1.16e-06	***
									ASV5929.Clostridium_methylpentosum	Acetate	0.216996	7.42e-05	Seychelles	0.000166	***
									ASV5929.Clostridium_methylpentosum	Butyrate	-0.0161823	0.779065	USA	0.800121
									ASV5929.Clostridium_methylpentosum	Butyrate	0.059402	0.251818	South Africa	0.622974
									ASV5929.Clostridium_methylpentosum	Butyrate	0.110134	0.0462547	Ghana	0.0976487
									ASV5929.Clostridium_methylpentosum	Butyrate	0.00180311	0.972765	Jamaica	0.972765
									ASV5929.Clostridium_methylpentosum	Butyrate	0.0502179	0.364626	Seychelles	0.589441
									ASV5929.Clostridium_methylpentosum	Propionate	-0.0531429	0.35659	USA	0.437111
									ASV5929.Clostridium_methylpentosum	Propionate	0.0339399	0.512881	South Africa	0.724745
									ASV5929.Clostridium_methylpentosum	Propionate	0.101095	0.0674576	Ghana	0.101855
									ASV5929.Clostridium_methylpentosum	Propionate	-0.129136	0.0140746	Jamaica	0.0364853	*
									ASV5929.Clostridium_methylpentosum	Propionate	0.0783209	0.157007	Seychelles	0.314013
									ASV5929.Clostridium_methylpentosum	Valerate	-0.0246058	0.669667	USA	0.795229
									ASV5929.Clostridium_methylpentosum	Valerate	-0.177812	0.000551	South Africa	0.00304953	**
									ASV5929.Clostridium_methylpentosum	Valerate	-0.0910418	0.0997717	Ghana	0.186956
									ASV5929.Clostridium_methylpentosum	Valerate	0.104499	0.0472525	Jamaica	0.0897797
									ASV5929.Clostridium_methylpentosum	Valerate	-0.0930472	0.0924963	Seychelles	0.270374
									ASV5929.Clostridium_methylpentosum	TotalSCFA	-0.0154796	0.788427	USA	0.809736
									ASV5929.Clostridium_methylpentosum	TotalSCFA	0.0600115	0.246976	South Africa	0.408047
									ASV5929.Clostridium_methylpentosum	TotalSCFA	0.109649	0.04723	Ghana	0.105573
[truncated: 152 more rows]

## Sheet: Supplementary Fig.1
[truncated: 20,222 more chars]
